# Supplementary material for: Diversity and evolution of the vertebrate chemoreceptor gene repertoire
Source: Research Square preprint supplement (doi:10.21203/rs.3.rs-2922188/v1), 2023-05-15
Supplement: Supplementary file 1 [file 7f3ddc25780350d599f35b98.xlsx]

## Sheet: a-BUSCO
genome_name	assembly version	Complete	Complete_single	Complete_duplicated	Fragmented	Missing	Total	Ref_busco
Loxodonta_africana	GCA_000001905.1_Loxafr3.0	3214	3165	49	80	60	3354	This study
Notamacropus_eugenii	GCA_000004035.1_Meug_1.1	1518	1435	83	1090	746	3354	This study
Myotis_lucifugus	GCA_000147115.1_Myoluc2.0	3044	2851	193	156	154	3354	This study
Mchenga_conophoros	GCA_000150855.1_ASM15085v1	20	20	0	161	3173	3354	This study
Labeotropheus_fuelleborni	GCA_000150875.1_ASM15087v1	14	14	0	168	3172	3354	This study
Melanochromis_auratus	GCA_000150895.1_ASM15089v1	15	13	2	168	3171	3354	This study
Rhamphochromis_esox	GCA_000150935.1_ASM15093v1	19	19	0	159	3176	3354	This study
Cavia_porcellus	GCA_000151735.1_Cavpor3.0	3224	3163	61	67	63	3354	This study
Pteropus_vampyrus	GCA_000151845.2_Pvam_2.0	3131	3108	23	143	80	3354	This study
Dipodomys_ordii	GCA_000151885.2_Dord_2.0	3125	3058	67	146	83	3354	This study
Choloepus_hoffmanni	GCA_000164785.2_C_hoffmanni-2.0.1	2994	2727	267	259	101	3354	This study
Carlito_syrichta	GCA_000164805.2_Tarsius_syrichta-2.0.1	3073	2931	142	191	90	3354	This study
Vicugna_pacos	GCA_000164845.5_VicPac3.2	3234	3195	39	67	53	3354	This study
Tetraodon_nigroviridis	GCA_000180735.1_ASM18073v1	2982	2913	69	172	200	3354	This study
Sorex_araneus	GCA_000181275.2_SorAra2.0	3147	3076	71	132	75	3354	This study
Otolemur_garnettii	GCA_000181295.3_OtoGar3	3265	3114	151	50	39	3354	This study
Tupaia_belangeri	GCA_000181375.1_ASM18137v1	650	550	100	1062	1642	3354	This study
Python_bivittatus	GCA_000186305.2_Python_molurus_bivittatus-5.0.2	2999	2971	28	227	128	3354	This study
Dasypus_novemcinctus	GCA_000208655.4_Dasnov3.2	3124	2958	166	143	87	3354	This study
Latimeria_chalumnae	GCA_000225785.1_LatCha1	2995	2954	41	239	120	3354	This study
Pelodiscus_sinensis	GCA_000230535.1_PelSin_1.0	3070	3043	27	153	131	3354	This study
Leucoraja_erinacea	GCA_000238235.1_LER_WGS_1	234	218	16	803	2317	3354	This study
Pundamilia_nyererei	GCA_000239375.1_PunNye1.0	3231	3218	13	69	54	3354	This study
Neolamprologus_brichardi	GCA_000239395.1_NeoBri1.0	3084	3061	23	160	110	3354	This study
Trichechus_manatus_latirostris	GCA_000243295.1_TriManLat1.0	3206	3143	63	82	66	3354	This study
Octodon_degus	GCA_000260255.1_OctDeg1.0	3217	2883	334	78	59	3354	This study
Condylura_cristata	GCA_000260355.1_ConCri1.0	3026	3003	23	128	200	3354	This study
Geospiza_fortis	GCA_000277835.1_GeoFor_1.0	2945	2913	32	207	202	3354	This study
Alligator_mississippiensis	GCA_000281125.4_ASM28112v4	3241	3222	19	66	47	3354	This study
Chrysochloris_asiatica	GCA_000296735.1_ChrAsi1.0	3252	3082	170	55	47	3354	This study
Erinaceus_europaeus	GCA_000296755.1_EriEur2.0	3208	3123	85	84	62	3354	This study
Orycteropus_afer_afer	GCA_000298275.1_OryAfe1.0	3190	3141	49	101	63	3354	This study
Bos_mutus	GCA_000298355.1_BosGru_v2.0	3183	3122	61	110	61	3354	This study
Elephantulus_edwardii	GCA_000299155.1_EleEdw1.0	3251	2845	406	60	43	3354	This study
Eptesicus_fuscus	GCA_000308155.1_EptFus1.0	3236	3179	57	71	47	3354	This study
Echinops_telfairi	GCA_000313985.2_ASM31398v2	3138	3027	111	128	88	3354	This study
Odobenus_rosmarus_divergens	GCA_000321225.1_Oros_1.0	3249	3079	170	54	51	3354	This study
Myotis_davidii	GCA_000327345.1_ASM32734v1	3089	2995	94	175	90	3354	This study
Pseudopodoces_humilis	GCA_000331425.1_PseHum1.0	3200	3184	16	71	83	3354	This study
Amazona_vittata	GCA_000332375.2_ASM33237v2	2732	2711	21	370	252	3354	This study
Tupaia_chinensis	GCA_000334495.1_TupChi_1.0	3243	3075	168	74	37	3354	This study
Leptonychotes_weddellii	GCA_000349705.1_LepWed1.0	2796	2679	117	397	161	3354	This study
Zonotrichia_albicollis	GCA_000385455.1_Zonotrichia_albicollis-1.0.1	2814	2791	23	260	280	3354	This study
Apalone_spinifera	GCA_000385615.1_ASM38561v1	700	686	14	1528	1126	3354	This study
Ara_macao	GCA_000400695.1_SMACv1.1	1389	1383	6	1262	703	3354	This study
Pantholops_hodgsonii	GCA_000400835.1_PHO1.0	3171	3055	116	103	80	3354	This study
Myotis_brandtii	GCA_000412655.1_ASM41265v1	3120	2977	143	146	88	3354	This study
Lipotes_vexillifer	GCA_000442215.1_Lipotes_vexillifer_v1	3236	3119	117	61	57	3354	This study
Alligator_sinensis	GCA_000455745.1_ASM45574v1	3120	3102	18	158	76	3354	This study
Panthera_tigris_altaica	GCA_000464555.1_PanTig1.0	3073	3043	30	177	104	3354	This study
Eidolon_helvum	GCA_000465285.1_ASM46528v1	2120	2094	26	834	400	3354	This study
Pteronotus_parnellii	GCA_000465405.1_ASM46540v1	1806	1751	55	966	582	3354	This study
Sebastes_nigrocinctus	GCA_000475235.3_ASM47523v3	2625	2609	16	431	298	3354	This study
Balaenoptera_acutorostrata_scammoni	GCA_000493695.1_BalAcu1.0	3224	3100	124	73	57	3354	This study
Anoplopoma_fimbria	GCA_000499045.2_NWFSC_Afim_r7.pbjelly	3026	2891	135	244	84	3354	This study
Ophiophagus_hannah	GCA_000516915.1_OphHan1.0	2848	2827	21	321	185	3354	This study
Lyrurus_tetrix_tetrix	GCA_000586395.1_tetTet1	136	132	4	905	2313	3354	This study
Nannospalax_galili	GCA_000622305.1_S.galili_v1.0	3236	3181	55	56	62	3354	This study
Egretta_garzetta	GCA_000687185.1_ASM68718v1	2943	2913	30	231	180	3354	This study
Phaethon_lepturus	GCA_000687285.1_ASM68728v1	2590	2579	11	494	270	3354	This study
Pelecanus_crispus	GCA_000687375.1_ASM68737v1	2427	2417	10	600	327	3354	This study
Cavia_aperea	GCA_000688575.1_CavAp1.0	2349	2312	37	624	381	3354	This study
Colius_striatus	GCA_000690715.1_ASM69071v1	2315	2305	10	662	377	3354	This study
Stegastes_partitus	GCA_000690725.1_Stegastes_partitus-1.0.2	3247	3230	17	58	49	3354	This study
Eurypyga_helias	GCA_000690775.1_ASM69077v1	2256	2238	18	681	417	3354	This study
Fulmarus_glacialis	GCA_000690835.1_ASM69083v1	2454	2444	10	568	332	3354	This study
Gavia_stellata	GCA_000690875.1_ASM69087v1	2376	2357	19	609	369	3354	This study
Haliaeetus_albicilla	GCA_000691405.1_ASM69140v1	2488	2474	14	526	340	3354	This study
Leptosomus_discolor	GCA_000691785.1_ASM69178v1	2508	2489	19	539	307	3354	This study
Corvus_brachyrhynchos	GCA_000691975.1_ASM69197v1	2958	2935	23	221	175	3354	This study
Opisthocomus_hoazin	GCA_000692075.1_ASM69207v1	2779	2760	19	288	287	3354	This study
Chlamydotis_macqueenii	GCA_000695195.1_ASM69519v1	2437	2420	17	557	360	3354	This study
Mesitornis_unicolor	GCA_000695765.1_ASM69576v1	2459	2438	21	568	327	3354	This study
Galeopterus_variegatus	GCA_000696425.1_G_variegatus-3.0.2	3024	2952	72	239	91	3354	This study
Equus_przewalskii	GCA_000696695.1_Burgud	3052	3014	38	219	83	3354	This study
Nestor_notabilis	GCA_000696875.1_ASM69687v1	2584	2573	11	484	286	3354	This study
Pampus_argenteus	GCA_000697985.1_PamArg1.0	404	394	10	1029	1921	3354	This study
Struthio_camelus_australis	GCA_000698965.1_ASM69896v1	2949	2923	26	215	190	3354	This study
Pygoscelis_adeliae	GCA_000699105.1_ASM69910v1	2876	2855	21	234	244	3354	This study
Aptenodytes_forsteri	GCA_000699145.1_ASM69914v1	3018	2999	19	178	158	3354	This study
Podiceps_cristatus	GCA_000699545.1_ASM69954v1	2142	2129	13	777	435	3354	This study
Cathartes_aura	GCA_000699945.1_ASM69994v1	1891	1872	19	925	538	3354	This study
Antrostomus_carolinensis	GCA_000700745.2_ASM70074v2	2292	2272	20	710	352	3354	This study
Apaloderma_vittatum	GCA_000703405.1_ASM70340v1	2385	2372	13	587	382	3354	This study
Tinamus_guttatus	GCA_000705375.2_ASM70537v2	2668	2636	32	411	275	3354	This study
Charadrius_vociferus	GCA_000708025.2_ASM70802v2	2966	2934	32	228	160	3354	This study
Nipponia_nippon	GCA_000708225.1_ASM70822v1	3043	3024	19	197	114	3354	This study
Phalacrocorax_carbo	GCA_000708925.1_ASM70892v1	2365	2353	12	618	371	3354	This study
Buceros_rhinoceros_silvestris	GCA_000710305.1_ASM71030v1	2483	2465	18	513	358	3354	This study
Notothenia_coriiceps	GCA_000735185.1_NC01	2212	2198	14	752	390	3354	This study
Crotalus_pyrrhus	GCA_000737285.1_CrotMitch1.0	999	980	19	1370	985	3354	This study
Haliaeetus_leucocephalus	GCA_000737465.1_Haliaeetus_leucocephalus-4.0	3170	3150	20	106	78	3354	This study
Chaetura_pelagica	GCA_000747805.2_ChaPel_1.1	2913	2886	27	239	202	3354	This study
Cervus_capreolus	GCA_000751575.1_kmer631	1703	1634	69	1107	544	3354	This study
Bison_bison_bison	GCA_000754665.1_Bison_UMD1.0	3148	3058	90	129	77	3354	This study
Ovis_aries_musimon	GCA_000765115.1_Oori1	3240	3142	98	63	51	3354	This study
Aquila_chrysaetos_canadensis	GCA_000766835.1_Aquila_chrysaetos-1.0.2	3192	3177	15	96	66	3354	This study
Vicugna_pacos_huacaya	GCA_000767525.1_Vi_pacos_V1.0	3248	3207	41	56	50	3354	This study
Camelus_bactrianus	GCA_000767855.1_Ca_bactrianus_MBC_1.0	3230	3192	38	77	47	3354	This study
Cyprinodon_nevadensis_pectoralis	GCA_000776015.1_ASM77601v1	2525	2507	18	491	338	3354	This study
Periophthalmodon_schlosseri	GCA_000787095.1_PS.fa	2760	2746	14	400	194	3354	This study
Scartelaos_histophorus	GCA_000787155.1_SH.fa	2481	2460	21	553	320	3354	This study
Pseudopleuronectes_yokohamae	GCA_000787555.1_Pyoko_1.0	1194	1163	31	1340	820	3354	This study
Boleophthalmus_pectinirostris	GCA_000788275.1_BP.fa	3215	3191	24	75	64	3354	This study
Vipera_berus_berus	GCA_000800605.1_Vber.be_1.0	2769	2744	25	383	202	3354	This study
Colobus_angolensis_palliatus	GCA_000951035.1_Cang.pa_1.0	3170	3044	126	134	50	3354	This study
Mandrillus_leucophaeus	GCA_000951045.1_Mleu.le_1.0	3164	3061	103	138	52	3354	This study
Aotus_nancymaae	GCA_000952055.2_Anan_2.0	3236	3066	170	64	54	3354	This study
Cercocebus_atys	GCA_000955945.1_Caty_1.0	3234	3126	108	70	50	3354	This study
Macaca_nemestrina	GCA_000956065.1_Mnem_1.0	3240	3141	99	71	43	3354	This study
Propithecus_coquereli	GCA_000956105.1_Pcoq_1.0	3088	2995	93	165	101	3354	This study
Anser_cygnoides_domesticus	GCA_000971095.1_AnsCyg_PRJNA183603_v1.0	2915	2898	17	231	208	3354	This study
Balaenoptera_bonaerensis	GCA_000978805.1_ASM97880v1	1776	1698	78	1124	454	3354	This study
Apteryx_mantelli_mantelli	GCA_001039765.2_AptMant0	2916	2891	25	250	188	3354	This study
Thamnophis_sirtalis	GCA_001077635.2_Thamnophis_sirtalis-6.0	2210	2183	27	609	535	3354	This study
Pantherophis_guttatus	GCA_001185365.2_UNIGE_PanGut_3.0	3149	3114	35	115	90	3354	This study
Eulemur_macaco	GCA_001262655.1_Emacaco_refEf_BWA_oneround	3136	3079	57	155	63	3354	This study
Eulemur_flavifrons	GCA_001262665.1_Eflavifronsk33QCA	3113	3055	58	161	80	3354	This study
Austrofundulus_limnaeus	GCA_001266775.1_Austrofundulus_limnaeus-1.0	2992	2973	19	222	140	3354	This study
Zosterops_lateralis_melanops	GCA_001281735.1_ASM128173v1	2958	2926	32	214	182	3354	This study
Apodemus_sylvaticus	GCA_001305905.1_ASM130590v1	2710	2690	20	420	224	3354	This study
Calidris_pugnax	GCA_001431845.1_ASM143184v1	3170	3147	23	87	97	3354	This study
Poecilia_latipinna	GCA_001443285.1_P_latipinna-1.0	3214	3187	27	82	58	3354	This study
Poecilia_mexicana	GCA_001443325.1_P_mexicana-1.0	3215	3181	34	79	60	3354	This study
Gekko_japonicus	GCA_001447785.1_Gekko_japonicus_V1.1	3088	3039	49	183	83	3354	This study
Cottus_rhenanus	GCA_001455555.1_ASM145555v1	1816	1803	13	997	541	3354	This study
Marmota_marmota_marmota	GCA_001458135.2_marMar	3234	3138	96	72	48	3354	This study
Sinocyclocheilus_anshuiensis	GCA_001515605.1_SAMN03320099.WGS_v1.1	3269	1140	2129	50	35	3354	This study
Sinocyclocheilus_rhinocerous	GCA_001515625.1_SAMN03320098_v1.1	3264	1269	1995	53	37	3354	This study
Sinocyclocheilus_grahami	GCA_001515645.1_SAMN03320097.WGS_v1.1	3167	1622	1545	121	66	3354	This study
Protobothrops_mucrosquamatus	GCA_001527695.3_P.Mucros_1.0	3139	3094	45	123	92	3354	This study
Miichthys_miiuy	GCA_001593715.1_ASM159371v1	2938	2897	41	202	214	3354	This study
Miniopterus_natalensis	GCA_001595765.1_Mnat.v1	3251	3200	51	62	41	3354	This study
Lepidothrix_coronata	GCA_001604755.1_Lepidothrix_coronata-1.0	3138	3123	15	86	130	3354	This study
Cebus_imitator	GCA_001604975.1_Cebus_imitator-1.0	3222	3098	124	80	52	3354	This study
Crotalus_horridus	GCA_001625485.1_ASM162548v1	2140	2109	31	786	428	3354	This study
Lates_calcarifer	GCA_001640805.2_TLL_Latcal_v3	3310	3230	80	19	25	3354	This study
Phylloscopus_trochiloides_viridanus	GCA_001655095.1_GWvir1.0	2132	2113	19	808	414	3354	This study
Phylloscopus_plumbeitarsus	GCA_001655115.1_GWplu1.0	1359	1350	9	1252	743	3354	This study
Phylloscopus_trochiloides_trochiloides	GCA_001655135.1_GWtro1.0	863	858	5	1405	1086	3354	This study
Neotoma_lepida	GCA_001675575.1_ASM167557v1	2665	2624	41	426	263	3354	This study
Ellobius_lutescens	GCA_001685075.1_ASM168507v1	2966	2902	64	271	117	3354	This study
Ellobius_talpinus	GCA_001685095.1_ETalpinus_0.1	1859	1811	48	1057	438	3354	This study
Rhinopithecus_bieti	GCA_001698545.2_ASM169854v2	3151	3030	121	134	69	3354	This study
Mola_mola	GCA_001698575.1_ASM169857v1	3271	3247	24	29	54	3354	This study
Manacus_vitellinus	GCA_001715985.3_ASM171598v3	2950	2932	18	191	213	3354	This study
Crocodylus_porosus	GCA_001723895.1_CroPor_comp1	3061	3045	16	78	215	3354	This study
Gavialis_gangeticus	GCA_001723915.1_GavGan_comp1	3015	2995	20	84	255	3354	This study
Malaclemys_terrapin_terrapin	GCA_001728815.2_terp_v2_2	3108	3051	57	156	90	3354	This study
Panthera_pardus	GCA_001857705.1_PanPar1.0	3258	3216	42	59	37	3354	This study
Tympanuchus_cupido_pinnatus	GCA_001870855.1_T_cupido_pinnatus_GPC_3440_v1	3167	3151	16	71	116	3354	This study
Rhinolophus_sinicus	GCA_001888835.1_ASM188883v1	3261	3177	84	55	38	3354	This study
Hipposideros_armiger	GCA_001890085.1_ASM189008v1	3059	2978	81	190	105	3354	This study
Hippocampus_comes	GCA_001891065.2_H_comes_QL1_v1.1	3213	3189	24	66	75	3354	This study
Monopterus_albus	GCA_001952655.1_M_albus_1.0	3252	3237	15	45	57	3354	This study
Castor_canadensis	GCA_001984765.1_C.can_genome_v1.0	2946	2830	116	286	122	3354	This study
Ciconia_boyciana	GCA_002002965.1_Ciconia_boyciana_ver1.0	1706	1653	53	1119	529	3354	This study
Grus_japonensis	GCA_002002985.1_Grus_japonensis_ver1.0	1527	1504	23	1192	635	3354	This study
Hypotaenidia_okinawae	GCA_002003005.1_Gallirallus_okinawae_ver1.0	1185	1171	14	1357	812	3354	This study
Ailurus_styani	GCA_002007465.1_ASM200746v1	3224	3152	72	79	51	3354	This study
Patagioenas_fasciata_monilis	GCA_002029285.1_NIATT_ARIZONA	3124	3104	20	132	98	3354	This study
Phascolarctos_cinereus	GCA_002099425.1_phaCin_unsw_v4.1	3266	3172	94	36	52	3354	This study
Odocoileus_virginianus_texanus	GCA_002102435.1_Ovir.te_1.0	3191	3063	128	108	55	3354	This study
Maccullochella_peelii	GCA_002120245.1_mcod_v1	3094	3081	13	184	76	3354	This study
Anser_cygnoides	GCA_002166845.1_GooseV1.0	3133	3110	23	115	106	3354	This study
Sporophila_hypoxantha	GCA_002167245.1_SpoHypox2.0	2918	2891	27	108	328	3354	This study
Phalacrocorax_pelagicus	GCA_002173435.1_ASM217343v1	3239	3225	14	66	49	3354	This study
Phalacrocorax_auritus	GCA_002173455.1_ASM217345v1	3244	3212	32	61	49	3354	This study
Phalacrocorax_harrisi	GCA_002173475.1_Pharrisi_ref_V1	3270	3255	15	44	40	3354	This study
Phalacrocorax_brasilianus	GCA_002174335.1_ASM217433v1	2803	2773	30	367	184	3354	This study
Eschrichtius_robustus	GCA_002189225.1_ASM218922v1	2890	2777	113	347	117	3354	This study
Ammotragus_lervia	GCA_002201775.1_ALER1.0	3212	3103	109	90	52	3354	This study
Meriones_unguiculatus	GCA_002204375.1_MunDraft-v1.0	3105	3061	44	165	84	3354	This study
Seriola_quinqueradiata	GCA_002217815.1_Squ_2.0	3271	3254	17	35	48	3354	This study
Callipepla_squamata	GCA_002218305.1_ASM221830v1	3159	3135	24	85	110	3354	This study
Anas_zonorhyncha	GCA_002224875.1_ASM222487v1	3122	3066	56	150	82	3354	This study
Seriola_dumerili	GCA_002260705.1_Sdu_1.0	3316	3298	18	15	23	3354	This study
Lithobates_catesbeianus	GCA_002284835.2_RCv2.1	1545	1486	59	1085	724	3354	This study
Enhydra_lutris_kenyoni	GCA_002288905.2_ASM228890v2	3269	3214	55	42	43	3354	This study
Delphinapterus_leucas	GCA_002288925.3_ASM228892v3	3246	3137	109	67	41	3354	This study
Uria_lomvia	GCA_002289315.1_UriLom_1.1	3212	3192	20	61	81	3354	This study
Phylloscopus_trochilus_acredula	GCA_002305835.1_ASM230583v1	3129	3107	22	84	141	3354	This study
Apodemus_speciosus	GCA_002335545.1_Aspe_assembly01	1573	1538	35	1049	732	3354	This study
Strix_occidentalis_caurina	GCA_002372975.2_StrOccCau_2.0	3198	3174	24	82	74	3354	This study
Spermophilus_dauricus	GCA_002406435.1_ASM240643v1	3143	3009	134	125	86	3354	This study
Tympanoctomys_barrerae	GCA_002564285.1_Tym_barrerae_AO245_v1	1305	1186	119	1128	921	3354	This study
Octomys_mimax	GCA_002564305.1_Oct_mimax_AO248_v1	1041	937	104	1255	1058	3354	This study
Anser_brachyrhynchus	GCA_002592135.1_ASM259213v1	3143	3120	23	104	107	3354	This study
Micropterus_floridanus	GCA_002592385.1_ASM259238v1	2318	2278	40	801	235	3354	This study
Agapornis_roseicollis	GCA_002631895.1_ASM263189v1	2907	2892	15	307	140	3354	This study
Seriola_lalandi_dorsalis	GCA_002814215.1_Sedor1	3261	3230	31	50	43	3354	This study
Symphodus_melops	GCA_002819105.1_ASM281910v1	3134	3072	62	71	149	3354	This study
Limosa_lapponica_baueri	GCA_002844005.1_Godwit_v1	1834	1819	15	680	840	3354	This study
Dicerorhinus_sumatrensis_sumatrensis	GCA_002844835.1_ASM284483v1	3167	3133	34	131	56	3354	This study
Acridotheres_javanicus	GCA_002849675.1_ASM284967v1	3148	3129	19	73	133	3354	This study
Psittacula_krameri	GCA_002870145.1_P.krameri1.0	3196	3147	49	90	68	3354	This study
Paramormyrops_kingsleyae	GCA_002872115.1_PKINGS_0.1	3238	3084	154	59	57	3354	This study
Coryphaenoides_rupestris	GCA_002895965.2_CRUPv2	2986	2846	140	213	155	3354	This study
Gopherus_agassizii	GCA_002896415.1_ASM289641v1	3107	3071	36	127	120	3354	This study
Pagrus_major	GCA_002897255.1_Pmaj_1.0	1525	1506	19	1147	682	3354	This study
Solenodon_paradoxus_woodi	GCA_002901085.1_ASM290108v1	2895	2876	19	327	132	3354	This study
Cyanistes_caeruleus	GCA_002901205.1_cyaCae2	3004	2980	24	180	170	3354	This study
Bambusicola_thoracicus	GCA_002909625.1_Bthov1.0	1777	1763	14	1101	476	3354	This study
Terrapene_carolina_triunguis	GCA_002925995.2_T_m_triunguis-2.0	3193	2968	225	101	60	3354	This study
Seriola_rivoliana	GCA_002994505.1_ASM299450v1	3248	3229	19	29	77	3354	This study
Hyaena_hyaena	GCA_003009895.1_ASM300989v1	3270	3222	48	39	45	3354	This study
Neophocaena_asiaeorientalis_asiaeorientalis	GCA_003031525.2_Neophocaena_asiaeorientalis_V1	3215	3117	98	81	58	3354	This study
Empidonax_traillii	GCA_003031625.1_ASM303162v1	3150	3128	22	91	113	3354	This study
Equus_asinus_asinus	GCA_003033725.1_ASM303372v1	3238	3200	38	63	53	3354	This study
Seriola_lalandi	GCA_003054885.1_wag_ytk_001	3014	2984	30	217	123	3354	This study
Sphenodon_punctatus	GCA_003113815.1_ASM311381v1	3184	3140	44	96	74	3354	This study
Macaca_fuscata_fuscata	GCA_003118495.1_macFus_1.0	2458	2346	112	679	217	3354	This study
Paroedura_picta	GCA_003118565.2_Ppicta_v2.0	2930	2902	28	279	145	3354	This study
Ovis_ammon	GCA_003121645.1_O_ammon_KGZ_v1.0	1971	1913	58	111	1272	3354	This study
Vulpes_vulpes	GCA_003160815.1_VulVul2.2	3246	3140	106	59	49	3354	This study
Pseudois_nayaur	GCA_003182575.1_ASM318257v1	2120	2036	84	871	363	3354	This study
Capra_sibirica	GCA_003182615.2_ASM318261v2	3258	3145	113	52	44	3354	This study
Tursiops_aduncus	GCA_003227395.1_ASM322739v1	3195	3061	134	112	47	3354	This study
Thunnus_thynnus	GCA_003231725.1_GBYP_Tthy_1.0	1221	1186	35	1341	792	3354	This study
Prolemur_simus	GCA_003258685.1_Prosim_1.0	3245	3174	71	64	45	3354	This study
Athene_cunicularia	GCA_003259725.1_athCun1	2940	2918	22	186	228	3354	This study
Spheniscus_mendiculus	GCA_003264655.1_ASM326465v1	2876	2857	19	224	254	3354	This study
Callorhinus_ursinus	GCA_003265705.1_ASM326570v1	3268	2990	278	45	41	3354	This study
Chlorodrepanis_virens	GCA_003286495.1_ASM328649v1	2961	2933	28	201	192	3354	This study
Hucho_hucho	GCA_003317085.1_ASM331708v1	3022	1743	1279	201	131	3354	This study
Puma_concolor	GCA_003327715.1_PumCon1.0	2997	2970	27	226	131	3354	This study
Mus_spicilegus	GCA_003336285.1_MUSP714	3236	3125	111	65	53	3354	This study
Eudromia_elegans	GCA_003342815.1_eudEle1	3139	3119	20	92	123	3354	This study
Rhea_pennata	GCA_003342835.1_rhePen1	3159	3139	20	98	97	3354	This study
Nothoprocta_perdicaria	GCA_003342845.1_notPer1	3103	3083	20	129	122	3354	This study
Casuarius_casuarius	GCA_003342895.1_casCas1	3199	3181	18	77	78	3354	This study
Crypturellus_cinnamomeus	GCA_003342915.1_cryCin1	3134	3109	25	121	99	3354	This study
Apteryx_owenii	GCA_003342965.1_aptOwe1	3134	3121	13	124	96	3354	This study
Apteryx_haastii	GCA_003342985.1_aptHaa1	3126	3114	12	124	104	3354	This study
Rhea_americana	GCA_003343005.1_rheAme1	3157	3139	18	91	106	3354	This study
Apteryx_rowi	GCA_003343035.1_aptRow1	3158	3147	11	113	83	3354	This study
Ageneiosus_marmoratus	GCA_003347165.1_ASM334716v1	2313	2289	24	573	468	3354	This study
Chlamydotis_undulata_undulata	GCA_003400225.2_REN_Cundu_1.1	3100	3079	21	149	105	3354	This study
Protobothrops_flavoviridis	GCA_003402635.1_HabAm_1.0	3074	3054	20	171	109	3354	This study
Chrysolophus_pictus	GCA_003413605.1_Chrysolophus_pictus_GenomeV1.0	3021	3004	17	198	135	3354	This study
Oplegnathus_fasciatus	GCA_003416845.1_ASM341684v1	3274	3262	12	47	33	3354	This study
Eopsaltria_australis	GCA_003426825.1_eyr_v1	3157	3055	102	87	110	3354	This study
Urocitellus_parryii	GCA_003426925.1_ASM342692v1	3206	3148	58	80	68	3354	This study
Chiloscyllium_punctatum	GCA_003427335.1_Cpunctatum_v1.0	2878	2821	57	248	228	3354	This study
Scyliorhinus_torazame	GCA_003427355.1_Storazame_v1.0	2553	2456	97	468	333	3354	This study
Syrmaticus_mikado	GCA_003435085.1_NTU_Smik_1.2	3181	3164	17	80	93	3354	This study
Thermophis_baileyi	GCA_003457575.1_DSBC_Tbai_1.0	3220	3189	31	55	79	3354	This study
Eonycteris_spelaea	GCA_003508835.1_Espe.v1	3184	3148	36	76	94	3354	This study
Mixornis_gularis	GCA_003546035.1_ASM354603v1	3080	3055	25	104	170	3354	This study
Oxygymnocypris_stewartii	GCA_003573665.1_Novo_Ost_1.0	3245	1948	1297	50	59	3354	This study
Ursus_arctos_horribilis	GCA_003584765.2_ASM358476v2	3258	3215	43	52	44	3354	This study
Salvator_merianae	GCA_003586115.2_HLtupMer6	3271	3239	32	40	43	3354	This study
Anguilla_japonica	GCA_003597225.1_Ajp_01	3129	2896	233	141	84	3354	This study
Chelonoidis_abingdonii	GCA_003597395.1_ASM359739v1	3213	3180	33	94	47	3354	This study
Sardina_pilchardus	GCA_003604335.1_UP_Spi	2212	2183	29	682	460	3354	This study
Chloebia_gouldiae	GCA_003676055.1_GouldianFinch	3091	3034	57	115	148	3354	This study
Marmota_flaviventris	GCA_003676075.3_GSC_YBM_2.1	3273	3163	110	48	33	3354	This study
Lagenorhynchus_obliquidens	GCA_003676395.1_ASM367639v1	3247	3132	115	63	44	3354	This study
Hirundo_rustica_rustica	GCA_003692655.1_Chelidonia	3193	3135	58	54	107	3354	This study
Calidris_pygmaea	GCA_003697955.1_ASM369795v1	3179	3151	28	79	96	3354	This study
Odocoileus_hemionus_sitkensis	GCA_003697985.1_ASM369798v1	1268	1186	82	1314	772	3354	This study
Taxidea_taxus_jeffersonii	GCA_003697995.1_ASM369799v1	2141	2097	44	883	330	3354	This study
Acinonyx_jubatus	GCA_003709585.1_Aci_jub_2	3259	2732	527	53	42	3354	This study
Paradisaea_rubra	GCA_003713215.1_ParRub_1.0	3157	3131	26	88	109	3354	This study
Paradisaea_raggiana	GCA_003713265.1_ParRag_1.0	3070	3042	28	139	145	3354	This study
Diphyllodes_magnificus	GCA_003713285.1_DipMag_1.0	3152	3131	21	81	121	3354	This study
Parotia_lawesii	GCA_003713295.1_ParLaw_1.0	3165	3144	21	72	117	3354	This study
Cicinnurus_regius	GCA_003713305.1_CicReg_1.0	3152	3135	17	82	120	3354	This study
Anabarilius_grahami	GCA_003731715.1_BGI_Agra_1.0	3273	3244	29	44	37	3354	This study
Axis_porcinus	GCA_003798545.1_ASM379854v1	3263	3098	165	55	36	3354	This study
Cuora_mccordi	GCA_003846335.1_ASM384633v1	3190	3130	60	109	55	3354	This study
Platysternon_megacephalum	GCA_003942145.1_ASM394214v1	3287	3252	35	28	39	3354	This study
Pipra_filicauda	GCA_003945595.2_ASM394559v2	3154	3130	24	58	142	3354	This study
Corapipo_altera	GCA_003945725.1_ASM394572v1	3160	3137	23	79	115	3354	This study
Oryx_gazella	GCA_003945745.1_UCDavis_Ogaz_1	3135	3052	83	116	103	3354	This study
Amazona_collaria	GCA_003947215.1_ASM394721v1	3169	3092	77	78	107	3354	This study
Neopelma_chrysocephalum	GCA_003984885.2_ASM398488v2	3174	1812	1362	83	97	3354	This study
Clarias_batrachus	GCA_003987875.1_ASM398787v1	3028	2995	33	174	152	3354	This study
Himantopus_leucocephalus	GCA_003993805.1_UO_Hhiman_2.0	2871	2855	16	256	227	3354	This study
Recurvirostra_avosetta	GCA_004023745.1_ASM402374v1	2567	2551	16	583	204	3354	This study
Hydrophis_hardwickii	GCA_004023765.1_ASM402376v1	1128	1100	28	1324	902	3354	This study
Mungos_mungo	GCA_004023785.1_MunMun_v1_BIUU	2999	2928	71	257	98	3354	This study
Panthera_onca	GCA_004023805.1_PanOnc_v1_BIUU	2700	2667	33	513	141	3354	This study
Helogale_parvula	GCA_004023845.1_HelPar_v1_BIUU	2886	2813	73	337	131	3354	This study
Cryptoprocta_ferox	GCA_004023885.1_CryFer_v1_BIUU	2976	2915	61	292	86	3354	This study
Felis_nigripes	GCA_004023925.1_FelNig_v1_BIUU	1434	1409	25	1300	620	3354	This study
Spilogale_gracilis	GCA_004023965.1_SpiGra_v1_BIUU	2623	2589	34	555	176	3354	This study
Paradoxurus_hermaphroditus	GCA_004024585.1_ParHer_v1_BIUU	2568	2536	32	586	200	3354	This study
Pteronura_brasiliensis	GCA_004024605.1_PteBra_v1_BIUU	2863	2806	57	379	112	3354	This study
Mellivora_capensis	GCA_004024625.1_MelCap_v1_BIUU	2723	2664	59	482	149	3354	This study
Mirza_coquereli	GCA_004024645.1_MizCoq_v1_BIUU	2406	2295	111	700	248	3354	This study
Dipodomys_stephensi	GCA_004024685.1_DipSte_v1_BIUU	2343	2255	88	755	256	3354	This study
Moschus_moschiferus	GCA_004024705.2_MosMos_v2_BIUU_UCD	3274	3106	168	50	30	3354	This study
Catagonus_wagneri	GCA_004024745.2_CatWag_v2_BIUU_UCD	3259	3227	32	49	46	3354	This study
Zapus_hudsonius	GCA_004024765.1_ZapHud_v1_BIUU	2315	2224	91	745	294	3354	This study
Xerus_inauris	GCA_004024805.1_XerIna_v1_BIUU	2647	2560	87	540	167	3354	This study
Pygathrix_nemaeus	GCA_004024825.1_PygNem_v1_BIUU	2544	2416	128	600	210	3354	This study
Tonatia_saurophila	GCA_004024845.1_TonSau_v1_BIUU	2949	2911	38	306	99	3354	This study
Saguinus_imperator	GCA_004024885.1_SagImp_v1_BIUU	2713	2462	251	477	164	3354	This study
Tapirus_indicus	GCA_004024905.1_TapInd_v1_BIUU	2905	2869	36	345	104	3354	This study
Scalopus_aquaticus	GCA_004024925.1_ScaAqu_v1_BIUU	2885	2852	33	349	120	3354	This study
Uropsilus_gracilis	GCA_004024945.1_UroGra_v1_BIUU	2159	2114	45	785	410	3354	This study
Tragulus_javanicus	GCA_004024965.2_ASM402496v2	3259	3107	152	46	49	3354	This study
Saiga_tatarica	GCA_004024985.1_SaiTat_v1_BIUU	1065	1007	58	1414	875	3354	This study
Tadarida_brasiliensis	GCA_004025005.1_TadBra_v1_BIUU	2309	2202	107	772	273	3354	This study
Tapirus_terrestris	GCA_004025025.1_TapTer_v1_BIUU	2822	2798	24	415	117	3354	This study
Sigmodon_hispidus	GCA_004025045.1_SigHis_v1_BIUU	2950	2723	227	298	106	3354	This study
Semnopithecus_entellus	GCA_004025065.1_SemEnt_v1_BIUU	1948	1835	113	1011	395	3354	This study
Thryonomys_swinderianus	GCA_004025085.1_ThrSwi_v1_BIUU	2008	1966	42	970	376	3354	This study
Tolypeutes_matacus	GCA_004025125.1_TolMat_v1_BIUU	1779	1552	227	1077	498	3354	This study
Miniopterus_schreibersii	GCA_004026525.1_MinSch_v1_BIUU	2991	2947	44	260	103	3354	This study
Mormoops_blainvillei	GCA_004026545.1_MorMeg_v1_BIUU	3026	3005	21	246	82	3354	This study
Noctilio_leporinus	GCA_004026585.1_NocLep_v1_BIUU	2972	2835	137	274	108	3354	This study
Ondatra_zibethicus	GCA_004026605.1_OndZib_v1_BIUU	2808	2733	75	395	151	3354	This study
Murina_aurata_feae	GCA_004026665.1_MurFea_v1_BIUU	2175	2105	70	871	308	3354	This study
Microgale_talazaci	GCA_004026705.1_MicTal_v1_BIUU	2218	2089	129	805	331	3354	This study
Myrmecophaga_tridactyla	GCA_004026745.1_MyrTri_v1_BIUU	2313	2201	112	766	275	3354	This study
Micronycteris_hirsuta	GCA_004026765.1_MicHir_v1_BIUU	2691	2641	50	498	165	3354	This study
Lasiurus_borealis	GCA_004026805.1_LasBor_v1_BIUU	2329	1726	603	789	236	3354	This study
Hemitragus_hylocrius	GCA_004026825.1_HemHyl_v1_BIUU	2792	2671	121	409	153	3354	This study
Heterohyrax_brucei	GCA_004026845.1_HetBruBak_v1_BIUU	2666	2635	31	531	157	3354	This study
Lepus_americanus	GCA_004026855.1_LepAme_v1_BIUU	1728	1630	98	1117	509	3354	This study
Megaderma_lyra	GCA_004026885.1_MegLyr_v1_BIUU	3064	3020	44	207	83	3354	This study
Hystrix_cristata	GCA_004026905.1_HysCri_v1_BIUU	2742	2675	67	443	169	3354	This study
Procavia_capensis	GCA_004026925.2_ProCapCap_v2_BIUU_UCD	3227	3199	28	73	54	3354	This study
Ovis_canadensis	GCA_004026945.1_OviCan_v1_BIUU	2683	2562	121	495	176	3354	This study
Petromus_typicus	GCA_004026965.1_PetTyp_v1_BIUU	2293	2241	52	768	293	3354	This study
Muscardinus_avellanarius	GCA_004027005.1_MusAve_v1_BIUU	2487	2396	91	650	217	3354	This study
Myocastor_coypus	GCA_004027025.1_MyoCoy_v1_BIUU	2248	2023	225	783	323	3354	This study
Mesoplodon_bidens	GCA_004027085.1_MesBid_v1_BIUU	2332	2203	129	756	266	3354	This study
Ctenomys_sociabilis	GCA_004027165.1_CteSoc_v1_BIUU	2593	2309	284	558	203	3354	This study
Glis_glis	GCA_004027185.1_GliGli_v1_BIUU	1905	1825	80	1034	415	3354	This study
Ctenodactylus_gundi	GCA_004027205.1_CteGun_v1_BIUU	3161	3131	30	130	63	3354	This study
Eulemur_fulvus	GCA_004027275.1_EulFul_v1_BIUU	1959	1887	72	1020	375	3354	This study
Dolichotis_patagonum	GCA_004027295.1_DolPat_v1_BIUU	2499	2443	56	628	227	3354	This study
Diceros_bicornis	GCA_004027315.2_DicBicMic_v2_BIUU_UCD	3280	3241	39	43	31	3354	This study
Macroglossus_sobrinus	GCA_004027375.1_MacSob_v1_BIUU	3137	3119	18	150	67	3354	This study
Hipposideros_galeritus	GCA_004027415.1_HipGal_v1_BIUU	2466	2301	165	651	237	3354	This study
Anoura_caudifer	GCA_004027475.1_AnoCau_v1_BIUU	3006	2974	32	263	85	3354	This study
Beatragus_hunteri	GCA_004027495.1_BeaHun_v1_BIUU	2628	2549	79	531	195	3354	This study
Acomys_cahirinus	GCA_004027535.1_AcoCah_v1_BIUU	2593	2524	69	572	189	3354	This study
Craseonycteris_thonglongyai	GCA_004027555.1_CraTho_v1_BIUU	2294	2221	73	749	311	3354	This study
Cricetomys_gambianus	GCA_004027575.1_CriGam_v1_BIUU	2951	2931	20	302	101	3354	This study
Dinomys_branickii	GCA_004027595.1_DinBra_v1_BIUU	2791	2714	77	401	162	3354	This study
Cercopithecus_neglectus	GCA_004027615.1_CertNeg_v1_BIUU	1683	1601	82	1075	596	3354	This study
Crocidura_indochinensis	GCA_004027635.1_CroInd_v1_BIUU	978	926	52	1318	1058	3354	This study
Graphiurus_murinus	GCA_004027655.1_GraMur_v1_BIUU	2003	1917	86	933	418	3354	This study
Cavia_tschudii	GCA_004027695.1_CavTsc_v1_BIUU	2899	2841	58	347	108	3354	This study
Plecturocebus_donacophilus	GCA_004027715.1_CalDon_v1_BIUU	2288	2190	98	790	276	3354	This study
Carollia_perspicillata	GCA_004027735.1_CarPer_v1_BIUU	1710	1672	38	1113	531	3354	This study
Bradypus_variegatus	GCA_004027775.1_BraVar_v1_BIUU	1175	1091	84	786	1393	3354	This study
Nycticebus_coucang	GCA_004027815.1_NycCou_v1_BIUU	2172	1956	216	857	325	3354	This study
Alouatta_palliata	GCA_004027835.1_AloPal_v1_BIUU	2527	2332	195	637	190	3354	This study
Aplodontia_rufa	GCA_004027875.1_AplRuf_v1_BIUU	2479	2393	86	663	212	3354	This study
Orientallactaga_bullata	GCA_004027895.1_AllBul_v1_BIUU	2079	1964	115	919	356	3354	This study
Capromys_pilorides	GCA_004027915.1_CapPil_v1_BIUU	1678	1539	139	965	711	3354	This study
Chaetophractus_vellerosus	GCA_004027955.1_ChaVel_v1_BIUU	1003	893	110	1298	1053	3354	This study
Eumetopias_jubatus	GCA_004028035.1_ASM402803v1	3257	3079	178	54	43	3354	This study
Cirrhinus_molitorella	GCA_004028445.1_ASM402844v1	1096	1070	26	1405	853	3354	This study
Cuora_amboinensis	GCA_004028625.2_ASM402862v2	2766	2670	96	422	166	3354	This study
Odocoileus_hemionus_hemionus	GCA_004115125.1_UofA_Ohem_1.0	3192	3079	113	111	51	3354	This study
Poropuntius_huangchuchieni	GCA_004124795.1_ASM412479v1	1208	1185	23	1247	899	3354	This study
Phasianus_colchicus	GCA_004143745.1_ASM414374v1	3212	3195	17	63	79	3354	This study
Emydocephalus_ijimae	GCA_004319985.1_emyIji_1.0	2220	2191	29	796	338	3354	This study
Hydrophis_melanocephalus	GCA_004320005.1_hydMel_1.0	2610	2587	23	461	283	3354	This study
Laticauda_laticaudata	GCA_004320025.1_latLat_1.0	2574	2555	19	533	247	3354	This study
Scolopax_mira	GCA_004320125.1_Scolopax_mira_ver1.0	2837	2820	17	377	140	3354	This study
Accipiter_nisus	GCA_004320145.1_Accipiter_nisus_ver1.0	2935	2914	21	306	113	3354	This study
Dendrocopos_noguchii	GCA_004320165.1_Dendrocopos_noguchii_ver1.0	1958	1941	17	919	477	3354	This study
Lagopus_muta_japonica	GCA_004320205.1_Lagopus_muta_japonica_ver1.0	2687	2671	16	474	193	3354	This study
Bubo_blakistoni	GCA_004320225.1_Bubo_blakistoni_ver1.0	2816	2794	22	392	146	3354	This study
Megaptera_novaeangliae	GCA_004329385.1_megNov1	3221	3131	90	82	51	3354	This study
Pseudoliparis_sp_Yap_Trench	GCA_004335475.1_ASM433547v1	3083	2766	317	102	169	3354	This study
Phoca_vitulina	GCA_004348235.1_GSC_HSeal_1.0	3264	3164	100	51	39	3354	This study
Anarrhichthys_ocellatus	GCA_004355925.1_GSC_Weel_1.0	3117	3100	17	136	101	3354	This study
Grus_nigricollis	GCA_004360235.1_ASM436023v1	3211	3196	15	55	88	3354	This study
Platanista_minor	GCA_004363435.1_PlaMin_v1_BIUU	1953	1820	133	1041	360	3354	This study
Eubalaena_japonica	GCA_004363455.1_EubJap_v1_BIUU	2491	2358	133	645	218	3354	This study
Phocoena_phocoena	GCA_004363495.1_PhoPho_v1_BIUU	2866	2769	97	371	117	3354	This study
Inia_geoffrensis	GCA_004363515.1_IniGeo_v1_BIUU	2247	2146	101	754	353	3354	This study
Dasyprocta_punctata	GCA_004363535.1_DasPun_v1_BIUU	2416	2351	65	686	252	3354	This study
Solenodon_paradoxus	GCA_004363575.1_SolPar_v1_BIUU	3139	3120	19	142	73	3354	This study
Indri_indri	GCA_004363605.1_IndInd_v1_BIUU	2301	2220	81	739	314	3354	This study
Kogia_breviceps	GCA_004363705.1_KogBre_v1_BIUU	2189	2087	102	867	298	3354	This study
Ziphius_cavirostris	GCA_004364475.1_ZipCav_v1_BIUU	1307	1239	68	1243	804	3354	This study
Orycteropus_afer	GCA_004365145.1_OryAfe_v1_BIUU	1903	1849	54	1049	402	3354	This study
Cuniculus_paca	GCA_004365215.1_CunPac_v1_BIUU	1139	1087	52	1374	841	3354	This study
Tupaia_tana	GCA_004365275.1_TupTan_v1_BIUU	1412	1259	153	1178	764	3354	This study
Phataginus_tricuspis	GCA_004765945.1_ManTri_v1_BIUU	2257	2206	51	812	285	3354	This study
Grammomys_surdaster	GCA_004785775.1_NIH_TR_1.0	3277	3113	164	41	36	3354	This study
Varanus_komodoensis	GCA_004798865.1_ASM479886v1	3219	3201	18	55	80	3354	This study
Morone_saxatilis	GCA_004916995.1_NCSU_SB_2.0	2983	2975	8	191	180	3354	This study
Planiliza_haematocheilus	GCA_005024645.1_Liza_haematocheila_0.1	3258	3039	219	27	69	3354	This study
Monodon_monoceros	GCA_005190385.2_NGI_Narwhal_1	3247	3138	109	63	44	3354	This study
Marmota_himalayana	GCA_005280165.1_ASM528016v1	3152	3058	94	93	109	3354	This study
Prionailurus_bengalensis_euptilurus	GCA_005406085.2_Prionailurus_bengalensis_euptilurus_v03	2824	2787	37	403	127	3354	This study
Macquaria_australasica	GCA_005408345.1_DU_Maus_v1.0	3261	3248	13	57	36	3354	This study
Marmota_vancouverensis	GCA_005458795.1_GSC_VIM_1.0	3088	2990	98	178	88	3354	This study
Bagarius_yarrelli	GCA_005784505.1_ASM578450v1	3190	3170	20	57	107	3354	This study
Centrocercus_minimus	GCA_005890655.1_Cmin_1.0	2937	2905	32	162	255	3354	This study
Triplophysa_siluroides	GCA_006030095.1_ASM603009v1	3231	3195	36	34	89	3354	This study
Branta_canadensis	GCA_006130075.1_GSC_cangoose_1.0	3173	3148	25	91	90	3354	This study
Anser_indicus	GCA_006229135.1_ASM622913v1	3131	3112	19	118	105	3354	This study
Liparis_tanakae	GCA_006348945.1_SNU_Ltan_1.0	2649	2627	22	400	305	3354	This study
Cervus_albirostris	GCA_006408465.1_WLD	3176	3007	169	109	69	3354	This study
Damaliscus_lunatus	GCA_006408505.1_CTB	3176	3079	97	118	60	3354	This study
Alcelaphus_buselaphus	GCA_006408545.1_HBT	291	284	7	862	2201	3354	This study
Giraffa_camelopardalis	GCA_006408565.1_GFE	3233	3163	70	68	53	3354	This study
Antidorcas_marsupialis	GCA_006408585.1_SGB	2887	2797	90	338	129	3354	This study
Connochaetes_taurinus	GCA_006408615.1_BWD	3108	3036	72	156	90	3354	This study
Nanger_granti	GCA_006408635.1_GTG	2686	2591	95	426	242	3354	This study
Madoqua_kirkii	GCA_006408675.1_KDD	1980	1908	72	963	411	3354	This study
Aepyceros_melampus	GCA_006408695.1_IMP	2719	2631	88	430	205	3354	This study
Sylvicapra_grimmia	GCA_006408735.1_CMD	2841	2741	100	356	157	3354	This study
Eudorcas_thomsonii	GCA_006408755.1_TMG	3220	3098	122	79	55	3354	This study
Tragelaphus_scriptus	GCA_006410495.1_BUB	2801	2662	139	395	158	3354	This study
Procapra_przewalskii	GCA_006410515.1_PLG	3139	3054	85	135	80	3354	This study
Litocranius_walleri	GCA_006410535.1_GRK	3220	3101	119	84	50	3354	This study
Capra_ibex	GCA_006410555.1_IBX	1854	1813	41	95	1405	3354	This study
Neotragus_moschatus	GCA_006410615.1_SUN	2622	2551	71	484	248	3354	This study
Cephalophus_harveyi	GCA_006410635.1_HVD	3004	2901	103	255	95	3354	This study
Kobus_ellipsiprymnus	GCA_006410655.1_DFW	3107	3020	87	174	73	3354	This study
Oreotragus_oreotragus	GCA_006410675.1_KSP	2837	2737	100	361	156	3354	This study
Philantomba_maxwellii	GCA_006410695.1_MXD	2436	2356	80	612	306	3354	This study
Enhydra_lutris_nereis	GCA_006410715.1_ASM641071v1	3052	3009	43	205	97	3354	This study
Raphicerus_campestris	GCA_006410735.1_SNB	2357	2279	78	624	373	3354	This study
Tragelaphus_imberbis	GCA_006410775.1_LEK	2519	2403	116	572	263	3354	This study
Tragelaphus_strepsiceros	GCA_006410795.1_GTK	2968	2839	129	277	109	3354	This study
Neotragus_pygmaeus	GCA_006410875.1_RAL	2316	2239	77	734	304	3354	This study
Redunca_redunca	GCA_006410935.1_BHR	2597	2515	82	525	232	3354	This study
Tragelaphus_spekii	GCA_006411015.1_STG	2264	2138	126	734	356	3354	This study
Tragelaphus_buxtoni	GCA_006411685.1_MTN	1241	1208	33	1298	815	3354	This study
Tragelaphus_oryx	GCA_006416875.1_CME	553	529	24	1270	1531	3354	This study
Ourebia_ourebi	GCA_006417275.1_ORB	493	478	15	1265	1596	3354	This study
Moschus_chrysogaster	GCA_006461725.1_NPU_MCHR_1.0	1589	1475	114	1063	702	3354	This study
Erethizon_dorsatum	GCA_006547115.1_GSC_porc_1.0	3259	3189	70	51	44	3354	This study
Globicephala_melas	GCA_006547405.1_ASM654740v1	3245	3124	121	66	43	3354	This study
Anomalopteryx_didiformis	GCA_006937325.1_anoDid_nucDNA_orig	2888	2870	18	268	198	3354	This study
Pachypanchax_playfairii	GCA_006937955.1_MPIBA_Ppla_1.0	3272	3254	18	38	44	3354	This study
Callopanchax_toddi	GCA_006937965.1_MPIBA_Ctod_1.0	3252	3224	28	51	51	3354	This study
Aphyosemion_australe	GCA_006937985.1_MPIBA_Aaus_1.0	3255	3218	37	52	47	3354	This study
Nothobranchius_kuhntae	GCA_006942095.1_MPIBA_Nkuh_1.0	3216	3184	32	76	62	3354	This study
Hippotragus_niger_niger	GCA_006942125.1_SCBI_HNig_1.0	3245	3141	104	63	46	3354	This study
Serinus_canaria	GCA_007115625.1_cibio_Scana_2019	3096	3071	25	110	148	3354	This study
Neogobius_melanostomus	GCA_007210695.1_RGoby_Basel_V2	3172	3119	53	71	111	3354	This study
Danionella_translucida	GCA_007224835.1_ASM722483v1	3092	3024	68	118	144	3354	This study
Zosterops_borbonicus	GCA_007252995.1_ZoBo_15179_v2.0	3191	3159	32	82	81	3354	This study
Microtus_oeconomus	GCA_007455595.1_ASM745559v1	2913	2808	105	327	114	3354	This study
Microtus_arvalis	GCA_007455615.1_ASM745561v1	2697	2550	147	495	162	3354	This study
Zosterops_pallidus	GCA_007556475.1_ZoPa_MNHNZO2015-572_v1.0	3081	3046	35	157	116	3354	This study
Alces_alces	GCA_007570765.1_GSC_moose_1.0	3055	2912	143	212	87	3354	This study
Antilocapra_americana	GCA_007570785.1_GSC_phorn_1.0	3259	3043	216	48	47	3354	This study
Tachycineta_bicolor	GCA_007636935.1_CLO_TRES_1	2340	2289	51	631	383	3354	This study
Sousa_chinensis	GCA_007760645.1_ASM776064v1	3246	3125	121	68	40	3354	This study
Peromyscus_californicus_insignis	GCA_007827085.3_ASM782708v3	3276	3178	98	35	43	3354	This study
Bos_frontalis	GCA_007844835.1_NRC_Mithun_1	3072	2997	75	193	89	3354	This study
Mesoclemmys_tuberculata	GCA_007922155.1_Mesoclemmys_tuberculata-1.0	3253	3185	68	51	50	3354	This study
Pelusios_castaneus	GCA_007922175.1_Pelusios_castaneus-1.0	3239	3213	26	72	43	3354	This study
Carettochelys_insculpta	GCA_007922185.1_Carettochelys_insculpta-1.0	3240	3138	102	66	48	3354	This study
Podocnemis_expansa	GCA_007922195.1_Podocnemis_expansa-1.0	3278	3251	27	31	45	3354	This study
Emydura_subglobosa	GCA_007922225.1_Emydura_subglobosa-1.0	3294	3239	55	19	41	3354	This study
Dermatemys_mawii	GCA_007922305.1_Dermatemys_mawii-1.0	3267	3227	40	44	43	3354	This study
Pedetes_capensis	GCA_007922755.1_PedCap_v1_BIUU	2767	2704	63	431	156	3354	This study
Antrozous_pallidus	GCA_007922775.1_AntPal_v1_BIUU	1808	1541	267	1124	422	3354	This study
Nycticeius_humeralis	GCA_007922795.1_NycHum_v1_BIUU	1802	1635	167	1109	443	3354	This study
Macrotus_californicus	GCA_007922815.1_MacCal_v1_BIUU	2330	2247	83	651	373	3354	This study
Pseudorectes_ferrugineus	GCA_008033365.1_NUS_rp_v1	1908	1891	17	943	503	3354	This study
Thalassoma_bifasciatum	GCA_008086565.1_UOO_Thbifa_1.2	3238	2797	441	70	46	3354	This study
Cheirogaleus_medius	GCA_008086735.1_ASM808673v1	3050	2973	77	165	139	3354	This study
Oreochromis_spilurus	GCA_008269305.1_ASM826930v1	2312	2293	19	777	265	3354	This study
Macquaria_ambigua	GCA_008360985.1_GOP001_1.1	3211	3199	12	98	45	3354	This study
Oryzias_sinensis	GCA_008586565.1_ASM858656v1	2919	2871	48	284	151	3354	This study
Colinus_virginianus	GCA_008692595.2_Cv_LA_2.0	3145	3127	18	79	130	3354	This study
Crocuta_crocuta	GCA_008692635.1_BGI_CrCroc_1.0	3222	3177	45	81	51	3354	This study
Cyanoderma_ruficeps	GCA_008694505.1_ASM869450v1	3158	3131	27	92	104	3354	This study
Charadrius_alexandrinus	GCA_008711295.1_ASM871129v1	3172	3153	19	108	74	3354	This study
Mirza_zaza	GCA_008750895.1_Mzaz_1.0	2555	2438	117	610	189	3354	This study
Microcebus_sp_3_GT-2019	GCA_008750915.1_Mjon_1.0	2214	2057	157	876	264	3354	This study
Microcebus_tavaratra	GCA_008750935.1_Mtav_1.0	2098	1942	156	927	329	3354	This study
Microcebus_mittermeieri	GCA_008750955.1_Mmit_1.0	1886	1720	166	1076	392	3354	This study
Microcebus_ravelobensis	GCA_008750975.1_Mrav_1.0	1705	1600	105	1150	499	3354	This study
Microcebus_griseorufus	GCA_008750995.1_Mgri_1.0	1843	1694	149	1081	430	3354	This study
Burhinus_oedicnemus	GCA_008921705.1_REN_Boedic_1.0	3018	2991	27	139	197	3354	This study
Datnioides_undecimradiatus	GCA_008933995.1_BGI_Dund_1.0	3300	3253	47	30	24	3354	This study
Carassius_auratus_red_var	GCA_009069565.1_ASM906956v1	3254	1601	1653	52	48	3354	This study
Ompok_bimaculatus	GCA_009108245.1_ASM910824v1	2904	2831	73	235	215	3354	This study
Sander_vitreus	GCA_009193085.1_ASM919308v1	1309	1279	30	1271	774	3354	This study
Spea_multiplicata	GCA_009364415.1_usc_Smult_1.0	2706	2489	217	453	195	3354	This study
Scaphiopus_couchii	GCA_009364435.1_usc_Scouchii_0.1	30	30	0	392	2932	3354	This study
Scaphiopus_holbrookii	GCA_009364455.1_usc_Sholbrookii_0.1	85	78	7	666	2603	3354	This study
Spea_bombifrons	GCA_009364475.1_usc_Sbombifrons_0.1	112	109	3	822	2420	3354	This study
Anthochaera_phrygia	GCA_009430485.1_ANU_Anthochaera_phrygia_1.0	392	390	2	1127	1835	3354	This study
Ursus_thibetanus_thibetanus	GCA_009660055.1_ASM966005v1	3274	3232	42	45	35	3354	This study
Lophius_piscatorius	GCA_009660295.1_BF2_Nord	3055	3040	15	216	83	3354	This study
Gambusia_holbrooki	GCA_009663075.1_ASM966307v1	2954	2878	76	291	109	3354	This study
Hemignathus_wilsoni	GCA_009690805.1_HemiWil1.0	3084	3061	23	137	133	3354	This study
Chionodraco_myersi	GCA_009756435.1_Cmyersi_v0.1	2661	2576	85	423	270	3354	This study
Chionodraco_hamatus	GCA_009756495.1_Chamatus_v0.1	1845	1829	16	873	636	3354	This study
Oreamnos_americanus	GCA_009758055.1_ASM975805v1	3065	2992	73	183	106	3354	This study
Sapajus_apella	GCA_009761245.1_GSC_monkey_1.0	3240	3082	158	66	48	3354	This study
Trachypithecus_francoisi	GCA_009764315.1_Tfra_2.0	3232	3080	152	61	61	3354	This study
Eremophila_alpestris_peregrina	GCA_009792885.1_CLO_EAlp_1.0	3173	3141	32	87	94	3354	This study
Cynopterus_brachyotis	GCA_009793145.1_ASM979314v1	2720	2704	16	384	250	3354	This study
Oophaga_pumilio	GCA_009801035.1_UCB_Opum_1.0	2408	2372	36	617	329	3354	This study
Tetrax_tetrax	GCA_009806455.1_REN_Tetrax_1.0	3016	2998	18	206	132	3354	This study
Sialia_sialis	GCA_009812075.1_Ss_LA_1.0	2906	2885	21	119	329	3354	This study
Nymphicus_hollandicus	GCA_009823435.1_ASM982343v1	1900	1866	34	1009	445	3354	This study
Rhizomys_pruinosus	GCA_009823505.1_RhiPru_1.0	3166	2940	226	121	67	3354	This study
Hylobates_moloch	GCA_009828535.3_HMol_V3	3224	3075	149	89	41	3354	This study
Aratinga_weddellii	GCA_009867205.1_ASM986720v1	2129	2114	15	889	336	3354	This study
Psittacus_erithacus	GCA_009867235.1_ASM986723v1	2528	2505	23	607	219	3354	This study
Psittacus_timneh	GCA_009867315.1_ASM986731v1	2535	2514	21	596	223	3354	This study
Culter_alburnus	GCA_009869775.1_ASM986977v1	3256	3224	32	43	55	3354	This study
Anodorhynchus_hyacinthinus	GCA_009936445.2_ASM993644v2	1671	1653	18	1123	560	3354	This study
Gymnarchus_niloticus	GCA_009936485.1_ASM993648v1	2826	2708	118	386	142	3354	This study
Ara_chloropterus	GCA_010014725.1_ASM1001472v1	609	496	113	1282	1463	3354	This study
Ara_ararauna	GCA_010014805.1_ASM1001480v1	2008	1993	15	974	372	3354	This study
Pyrrhura_frontalis	GCA_010014865.1_ASM1001486v1	2201	2184	17	839	314	3354	This study
Psitteuteles_goldiei	GCA_010014875.2_ASM1001487v2	2172	2161	11	867	315	3354	This study
Lorius_garrulus	GCA_010014925.1_ASM1001492v1	1706	1686	20	1103	545	3354	This study
Syngnathus_floridae	GCA_010014945.1_ASM1001494v1	2396	2366	30	613	345	3354	This study
Pyrrhura_griseipectus	GCA_010014965.2_ASM1001496v2	2351	2326	25	744	259	3354	This study
Lophochroa_leadbeateri	GCA_010015045.2_ASM1001504v2	1504	1494	10	1299	551	3354	This study
Lontra_canadensis	GCA_010015895.1_GSC_riverotter_1.0	3259	3185	74	47	48	3354	This study
Ara_militaris	GCA_010015965.1_ASM1001596v1	634	550	84	1442	1278	3354	This study
Spheniscus_magellanicus	GCA_010076225.1_BGI_Smag.V1	3169	3139	30	105	80	3354	This study
Spheniscus_humboldti	GCA_010076325.1_BGI_Shum.V1	3197	3180	17	96	61	3354	This study
Spheniscus_demersus	GCA_010077935.1_BGI_Sdem.V1	3003	2975	28	183	168	3354	This study
Pygoscelis_antarcticus	GCA_010078415.1_BGI_Pant.V1	2977	2947	30	189	188	3354	This study
Eudyptes_sclateri	GCA_010078445.1_BGI_Escl.V1	3097	3078	19	141	116	3354	This study
Megadyptes_antipodes_antipodes	GCA_010078485.1_BGI_Mant.V1	3041	3018	23	174	139	3354	This study
Eudyptula_novaehollandiae	GCA_010078495.1_BGI_Enov.V1	3103	3042	61	135	116	3354	This study
Eudyptula_minor	GCA_010080355.1_BGI_Emin.V1	3036	2904	132	187	131	3354	This study
Eudyptes_schlegeli	GCA_010080425.1_BGI_Esch.V1	3177	3149	28	101	76	3354	This study
Eudyptula_albosignata	GCA_010080465.1_BGI_Emin_alb.V1	3032	2968	64	190	132	3354	This study
Eudyptes_moseleyi	GCA_010082375.1_BGI_Emos.V1	3192	3178	14	86	76	3354	This study
Eudyptes_chrysolophus	GCA_010084205.1_BGI_Echrysol.V1	3009	2906	103	176	169	3354	This study
Eudyptes_robustus	GCA_010085315.1_BGI_Erob.V1	3052	3012	40	198	104	3354	This study
Eudyptes_pachyrhynchus	GCA_010085335.1_BGI_Epac.V1	3261	2694	567	58	35	3354	This study
Eudyptes_chrysocome	GCA_010085355.1_BGI_Echrysoc.V1	3118	3100	18	121	115	3354	This study
Eudyptes_filholi	GCA_010085365.1_BGI_Echrysoc_fil.V1	3138	3115	23	114	102	3354	This study
Aptenodytes_patagonicus	GCA_010087175.1_BGI_Apat.V1	2951	2927	24	198	205	3354	This study
Pygoscelis_papua	GCA_010090195.1_BGI_Ppap.V1	2996	2964	32	208	150	3354	This study
Rhombomys_opimus	GCA_010120015.1_ASM1012001v1	3229	3175	54	70	55	3354	This study
Poeciliopsis_turrubarensis	GCA_010277015.1_ASM1027701v1	3233	3219	14	59	62	3354	This study
Poeciliopsis_retropinna	GCA_010277075.1_ASM1027707v1	3279	3265	14	26	49	3354	This study
Bubo_bubo	GCA_010303855.1_BubBub1.0	2970	2949	21	215	169	3354	This study
Buteo_japonicus	GCA_010312235.1_ButJap1.0	3049	3025	24	194	111	3354	This study
Otus_sunia	GCA_010365825.1_OtuSun1.0	3116	3093	23	149	89	3354	This study
Protosalanx_chinensis	GCA_010882115.1_ASM1088211v1	3208	3181	27	75	71	3354	This study
Poeciliopsis_occidentalis	GCA_010883035.1_ASM1088303v1	3195	3134	61	85	74	3354	This study
Limnodynastes_dumerilii	GCA_011038615.1_BGI_Ldum_1.0	2820	2774	46	332	202	3354	This study
Pterocles_orientalis	GCA_011057875.1_REN_Porient_1.0	3086	3064	22	129	139	3354	This study
Melospiza_melodia_maxima	GCA_011057915.1_Mmel_1.0	2572	2554	18	364	418	3354	This study
Melanerpes_aurifrons	GCA_011125475.1_OU_Melaur_1	3233	3187	46	48	73	3354	This study
Cynomys_gunnisoni	GCA_011316645.1_ASM1131664v1	3186	3058	128	112	56	3354	This study
Eupsittula_pertinax	GCA_011317185.1_ASM1131718v1	2335	2300	35	738	281	3354	This study
Clarias_macrocephalus	GCA_011419295.1_DU_Cmac_1.0	2973	2934	39	246	135	3354	This study
Gymnobelideus_leadbeateri	GCA_011680675.1_LBP_v1	3144	2745	399	147	63	3354	This study
Aeorestes_cinereus	GCA_011751065.1_L.cinereus_Cryan_1219_p1.0	3168	3021	147	80	106	3354	This study
Pontoporia_blainvillei	GCA_011754075.1_ASM1175407v1	996	963	33	1407	951	3354	This study
Pionus_senilis	GCA_011762725.1_ASM1176272v1	317	297	20	1144	1893	3354	This study
Pyrrhura_molinae	GCA_011763355.1_ASM1176335v1	2159	2140	19	867	328	3354	This study
Pyrrhura_perlata	GCA_011763455.2_ASM1176345v2	2404	2389	15	702	248	3354	This study
Lythrypnus_dalli	GCA_011763505.1_ASM1176350v1	1199	1076	123	1213	942	3354	This study
Mormyrus_iriodes	GCA_011763525.1_ASM1176352v1	2610	2509	101	530	214	3354	This study
Eclectus_roratus	GCA_011763535.2_ASM1176353v2	2253	2239	14	803	298	3354	This study
Mustela_putorius_furo	GCA_011764305.2_ASM1176430v1.1	3276	3210	66	41	37	3354	This study
Guaruba_guarouba	GCA_011800095.2_ASM1180009v2	2318	2294	24	773	263	3354	This study
Mirounga_leonina	GCA_011800145.1_KU_Mleo_1.0	3262	3140	122	50	42	3354	This study
Ardeotis_arabs	GCA_011801015.1_REN_Aarabs_1.0	2550	2524	26	577	227	3354	This study
Dissostichus_mawsoni	GCA_011823955.1_KU_Dm_1.0	3201	3035	166	69	84	3354	This study
Hydrolagus_affinis	GCA_012026655.1_UP_Haf	1835	1803	32	933	586	3354	This study
Aquila_chrysaetos_japonica	GCA_012057345.1_Achrysaetos_1.0	2948	2927	21	313	93	3354	This study
Fukomys_damarensis	GCA_012274545.1_DMR_v1.0_HiC	3188	3130	58	107	59	3354	This study
Halichoerus_grypus	GCA_012393455.1_Tufts_HGry_1.1	3183	3093	90	107	64	3354	This study
Nisaetus_nipalensis	GCA_012487455.1_Nnipalensis_1.0	2927	2905	22	310	117	3354	This study
Grus_monacha	GCA_012487855.1_Gmonacha_1.0	2858	2845	13	374	122	3354	This study
Antigone_vipio	GCA_012488435.1_Gvipio_1.0	2836	2822	14	382	136	3354	This study
Martes_zibellina	GCA_012583365.1_ASM1258336v1	3217	3181	36	93	44	3354	This study
Ptyas_mucosa	GCA_012654045.1_UNIGE_Pmuc_v1.0	3155	3119	36	103	96	3354	This study
Pantherophis_obsoletus	GCA_012654085.1_UNIGE_PanObs_1.0	3078	3046	32	159	117	3354	This study
Trematomus_loennbergii	GCA_012861695.1_KUTl01	3150	2784	366	98	106	3354	This study
Capreolus_pygargus	GCA_012922965.1_ASM1292296v1	3240	3072	168	65	49	3354	This study
Labeo_catla	GCA_012976165.1_CIFA_Catla_1.0	3229	3188	41	51	74	3354	This study
Acipenser_oxyrinchus_oxyrinchus	GCA_013184475.1_ASM1318447v1	229	209	20	1109	2016	3354	This study
Turdus_rufiventris	GCA_013186435.1_ASM1318643v1	3069	3043	26	133	152	3354	This study
Lama_glama_chaku	GCA_013239585.1_ASM1323958v1	3264	3227	37	49	41	3354	This study
Lama_guanicoe_cacsilensis	GCA_013239625.1_ASM1323962v1	3278	3239	39	37	39	3354	This study
Vicugna_vicugna_mensalis	GCA_013265495.1_ASM1326549v1	3281	3244	37	39	34	3354	This study
Menidia_beryllina	GCA_013363375.1_ASM1336337v1	2744	2641	103	246	364	3354	This study
Fulica_atra	GCA_013372525.1_Fatr_1.0	3036	3008	28	152	166	3354	This study
Percina_caprodes	GCA_013375575.1_MU_Pcap_1.0	3278	2877	401	24	52	3354	This study
Cygnus_atratus	GCA_013377495.1_Cygnus_atratus_primary_v1.0	3209	3191	18	49	96	3354	This study
Crypturellus_undulatus	GCA_013389825.1_ASM1338982v1	2883	2861	22	304	167	3354	This study
Crypturellus_soui	GCA_013389845.1_ASM1338984v1	2951	2925	26	246	157	3354	This study
Piaya_cayana	GCA_013389865.1_ASM1338986v1	2770	2755	15	374	210	3354	This study
Geococcyx_californianus	GCA_013389885.1_ASM1338988v1	2436	2426	10	621	297	3354	This study
Sula_dactylatra	GCA_013389905.1_ASM1338990v1	2394	2382	12	573	387	3354	This study
Aegithalos_caudatus	GCA_013389925.1_ASM1338992v1	2822	2800	22	315	217	3354	This study
Fregata_magnificens	GCA_013389945.1_ASM1338994v1	2428	2413	15	588	338	3354	This study
Todus_mexicanus	GCA_013389965.1_ASM1338996v1	1438	1418	20	990	926	3354	This study
Dryoscopus_gambensis	GCA_013389985.1_ASM1338998v1	2455	2439	16	510	389	3354	This study
Calyptomena_viridis	GCA_013390005.1_ASM1339000v1	2703	2683	20	393	258	3354	This study
Pitta_sordida	GCA_013390025.1_ASM1339002v1	2876	2858	18	287	191	3354	This study
Picathartes_gymnocephalus	GCA_013390045.1_ASM1339004v1	2727	2709	18	378	249	3354	This study
Chloropsis_hardwickii	GCA_013390065.1_ASM1339006v1	2948	2910	38	188	218	3354	This study
Grus_americana	GCA_013390085.1_ASM1339008v1	2742	2730	12	399	213	3354	This study
Tichodroma_muraria	GCA_013390105.1_ASM1339010v1	2058	2043	15	675	621	3354	This study
Hydrodamalis_gigas	GCA_013391785.1_H_Gigas_1.0	490	448	42	952	1912	3354	This study
Menura_novaehollandiae	GCA_013396355.1_ASM1339635v1	3143	3131	12	96	115	3354	This study
Cochlearius_cochlearius	GCA_013396365.1_ASM1339636v1	3106	3093	13	134	114	3354	This study
Ardeotis_kori	GCA_013396375.1_ASM1339637v1	3026	3008	18	177	151	3354	This study
Anhinga_anhinga	GCA_013396435.1_ASM1339643v1	2981	2943	38	218	155	3354	This study
Lophotis_ruficrista	GCA_013396455.1_ASM1339645v1	3075	3060	15	132	147	3354	This study
Smithornis_capensis	GCA_013396465.1_ASM1339646v1	3051	3036	15	134	169	3354	This study
Ptilorrhoa_leucosticta	GCA_013396485.1_ASM1339648v1	2975	2952	23	177	202	3354	This study
Chunga_burmeisteri	GCA_013396505.1_ASM1339650v1	3169	3156	13	101	84	3354	This study
Chaetorhynchus_papuensis	GCA_013396525.1_ASM1339652v1	3079	3051	28	143	132	3354	This study
Tachuris_rubrigastra	GCA_013396555.1_ASM1339655v1	3135	3115	20	104	115	3354	This study
Rhodinocichla_rosea	GCA_013396575.1_ASM1339657v1	3084	3062	22	131	139	3354	This study
Nyctibius_bracteatus	GCA_013396595.1_ASM1339659v1	3002	2984	18	209	143	3354	This study
Oceanites_oceanicus	GCA_013396615.1_ASM1339661v1	3070	3051	19	183	101	3354	This study
Penelope_pileata	GCA_013396635.1_ASM1339663v1	3118	3101	17	115	121	3354	This study
Campylorhamphus_procurvoides	GCA_013396655.1_ASM1339665v1	3096	3078	18	129	129	3354	This study
Eubucco_bourcierii	GCA_013396675.1_ASM1339667v1	2955	2933	22	252	147	3354	This study
Sakesphorus_luctuosus	GCA_013396695.1_ASM1339669v1	3040	3022	18	170	144	3354	This study
Ciccaba_nigrolineata	GCA_013396715.1_ASM1339671v1	3029	3011	18	205	120	3354	This study
Grallaria_varia	GCA_013396735.1_ASM1339673v1	3029	3007	22	188	137	3354	This study
Sclerurus_mexicanus	GCA_013396755.1_ASM1339675v1	3084	3069	15	133	137	3354	This study
Cephalopterus_ornatus	GCA_013396775.1_ASM1339677v1	2959	2944	15	239	156	3354	This study
Corythaeola_cristata	GCA_013396815.1_ASM1339681v1	2314	2289	25	590	450	3354	This study
Psilopogon_haemacephalus	GCA_013396835.1_ASM1339683v1	3035	3019	16	183	136	3354	This study
Vireo_altiloquus	GCA_013396875.1_ASM1339687v1	3094	3068	26	134	126	3354	This study
Loxia_leucoptera	GCA_013396895.1_ASM1339689v1	3029	2999	30	184	141	3354	This study
Stercorarius_parasiticus	GCA_013396915.1_ASM1339691v1	3107	3087	20	136	111	3354	This study
Baryphthengus_martii	GCA_013396935.1_ASM1339693v1	2878	2857	21	307	169	3354	This study
Regulus_satrapa	GCA_013396955.1_ASM1339695v1	2860	2840	20	282	212	3354	This study
Bucco_capensis	GCA_013396975.1_ASM1339697v1	3024	3006	18	214	116	3354	This study
Dicaeum_eximium	GCA_013396995.1_ASM1339699v1	3107	3081	26	130	117	3354	This study
Myiagra_hebetior	GCA_013397015.1_ASM1339701v1	3071	3048	23	151	132	3354	This study
Oceanodroma_tethys	GCA_013397025.1_ASM1339702v1	2999	2978	21	234	121	3354	This study
Pachycephala_philippinensis	GCA_013397055.1_ASM1339705v1	3011	2990	21	184	159	3354	This study
Rhabdornis_inornatus	GCA_013397075.1_ASM1339707v1	3147	3130	17	99	108	3354	This study
Sterrhoptilus_dennistouni	GCA_013397095.1_ASM1339709v1	3010	2979	31	194	150	3354	This study
Edolisoma_coerulescens	GCA_013397115.1_ASM1339711v1	3096	3072	24	131	127	3354	This study
Pachyramphus_minor	GCA_013397135.1_ASM1339713v1	3090	3072	18	128	136	3354	This study
Irena_cyanogastra	GCA_013397155.1_ASM1339715v1	3002	2976	26	208	144	3354	This study
Platysteira_castanea	GCA_013397175.1_ASM1339717v1	3070	3044	26	152	132	3354	This study
Hylia_prasina	GCA_013397195.1_ASM1339719v1	3031	3008	23	161	162	3354	This study
Lanius_ludovicianus	GCA_013397235.1_ASM1339723v1	3006	2989	17	185	163	3354	This study
Thryothorus_ludovicianus	GCA_013397245.1_ASM1339724v1	2951	2923	28	229	174	3354	This study
Burhinus_bistriatus	GCA_013397275.1_ASM1339727v1	3068	3043	25	184	102	3354	This study
Polioptila_caerulea	GCA_013397295.1_ASM1339729v1	3013	2989	24	170	171	3354	This study
Donacobius_atricapilla	GCA_013397315.1_ASM1339731v1	3001	2978	23	192	161	3354	This study
Motacilla_alba	GCA_013397355.1_ASM1339735v1	2966	2939	27	226	162	3354	This study
Toxostoma_redivivum	GCA_013397375.1_ASM1339737v1	3090	3070	20	134	130	3354	This study
Sinosuthora_webbiana	GCA_013397395.1_ASM1339739v1	3086	3060	26	145	123	3354	This study
Neopipo_cinnamomea	GCA_013397415.1_ASM1339741v1	3006	2989	17	176	172	3354	This study
Erythrocercus_mccallii	GCA_013397435.1_ASM1339743v1	2922	2895	27	225	207	3354	This study
Crotophaga_sulcirostris	GCA_013397455.1_ASM1339745v1	3080	3062	18	137	137	3354	This study
Furnarius_figulus	GCA_013397465.1_ASM1339746v1	3010	2996	14	178	166	3354	This study
Mionectes_macconnelli	GCA_013397495.1_ASM1339749v1	3129	3109	20	102	123	3354	This study
Upupa_epops	GCA_013397515.1_ASM1339751v1	2946	2926	20	236	172	3354	This study
Pterocles_burchelli	GCA_013397535.1_ASM1339753v1	3055	3039	16	157	142	3354	This study
Urocynchramus_pylzowi	GCA_013397555.1_ASM1339755v1	3054	3029	25	155	145	3354	This study
Ptilonorhynchus_violaceus	GCA_013397565.1_ASM1339756v1	3083	3062	21	143	128	3354	This study
Halcyon_senegalensis	GCA_013397595.1_ASM1339759v1	3157	3140	17	100	97	3354	This study
Eolophus_roseicapilla	GCA_013397615.1_ASM1339761v1	2881	2862	19	266	207	3354	This study
Columbina_picui	GCA_013397635.1_ASM1339763v1	2695	2674	21	366	293	3354	This study
Chroicocephalus_maculipennis	GCA_013397655.1_ASM1339765v1	2905	2878	27	253	196	3354	This study
Probosciger_aterrimus	GCA_013397665.1_ASM1339766v1	2868	2851	17	326	160	3354	This study
Centropus_unirufus	GCA_013397695.1_ASM1339769v1	3085	3065	20	131	138	3354	This study
Calcarius_ornatus	GCA_013397715.1_ASM1339771v1	2974	2949	25	195	185	3354	This study
Rhagologus_leucostigma	GCA_013397725.1_ASM1339772v1	3124	3101	23	115	115	3354	This study
Cnemophilus_loriae	GCA_013397755.1_ASM1339775v1	3099	3075	24	129	126	3354	This study
Eulacestoma_nigropectus	GCA_013397775.1_ASM1339777v1	3134	3113	21	111	109	3354	This study
Orthonyx_spaldingii	GCA_013397795.1_ASM1339779v1	3146	3124	22	108	100	3354	This study
Aleadryas_rufinucha	GCA_013397815.1_ASM1339781v1	2957	2934	23	222	175	3354	This study
Onychorhynchus_coronatus	GCA_013397825.1_ASM1339782v1	3156	3142	14	86	112	3354	This study
Melanocharis_versteri	GCA_013397845.1_ASM1339784v1	3071	3052	19	145	138	3354	This study
Struthidea_cinerea	GCA_013397865.1_ASM1339786v1	3108	3086	22	122	124	3354	This study
Origma_solitaria	GCA_013397895.1_ASM1339789v1	3126	3100	26	128	100	3354	This study
Daphoenositta_chrysoptera	GCA_013397915.1_ASM1339791v1	3051	3024	27	157	146	3354	This study
Dasyornis_broadbenti	GCA_013397935.1_ASM1339793v1	3147	3128	19	116	91	3354	This study
Grantiella_picta	GCA_013397955.1_ASM1339795v1	3117	3095	22	115	122	3354	This study
Machaerirhynchus_nigripectus	GCA_013397975.1_ASM1339797v1	3067	3045	22	147	140	3354	This study
Malurus_elegans	GCA_013397995.1_ASM1339799v1	3033	3013	20	158	163	3354	This study
Oreocharis_arfaki	GCA_013398015.1_ASM1339801v1	3048	3026	22	160	146	3354	This study
Panurus_biarmicus	GCA_013398035.1_ASM1339803v1	2597	2572	25	406	351	3354	This study
Ifrita_kowaldi	GCA_013398055.1_ASM1339805v1	2997	2970	27	221	136	3354	This study
Notiomystis_cincta	GCA_013398075.1_ASM1339807v1	2857	2833	24	316	181	3354	This study
Rhynochetos_jubatus	GCA_013398095.1_ASM1339809v1	3040	3024	16	153	161	3354	This study
Falcunculus_frontatus	GCA_013398115.1_ASM1339811v1	3109	3088	21	131	114	3354	This study
Aegotheles_bennettii	GCA_013398125.1_ASM1339812v1	2929	2910	19	268	157	3354	This study
Pedionomus_torquatus	GCA_013398155.1_ASM1339815v1	2874	2859	15	297	183	3354	This study
Climacteris_rufus	GCA_013398175.1_ASM1339817v1	3073	3052	21	156	125	3354	This study
Caloenas_nicobarica	GCA_013398195.1_ASM1339819v1	3046	3027	19	85	223	3354	This study
Steatornis_caripensis	GCA_013398225.1_ASM1339822v1	3013	2990	23	229	112	3354	This study
Promerops_cafer	GCA_013398275.1_ASM1339827v1	3056	3034	22	146	152	3354	This study
Chionis_minor	GCA_013398295.1_ASM1339829v1	3100	3081	19	153	101	3354	This study
Nothoprocta_pentlandii	GCA_013398315.1_ASM1339831v1	2981	2967	14	185	188	3354	This study
Nothoprocta_ornata	GCA_013398335.1_ASM1339833v1	3035	3019	16	167	152	3354	This study
Nothocercus_nigrocapillus	GCA_013398345.1_ASM1339834v1	2957	2942	15	214	183	3354	This study
Aphelocoma_coerulescens	GCA_013398375.1_ASM1339837v1	3165	3149	16	84	105	3354	This study
Pheucticus_melanocephalus	GCA_013398405.1_ASM1339840v1	2748	2725	23	308	298	3354	This study
Loxia_curvirostra	GCA_013398455.1_ASM1339845v1	3153	3123	30	95	106	3354	This study
Asarcornis_scutulata	GCA_013398475.1_ASM1339847v1	3146	3123	23	114	94	3354	This study
Vidua_chalybeata	GCA_013398495.1_ASM1339849v1	3132	3104	28	108	114	3354	This study
Certhia_familiaris	GCA_013398575.1_ASM1339857v1	2742	2725	17	365	247	3354	This study
Cercotrichas_coryphoeus	GCA_013398595.1_ASM1339859v1	3028	3009	19	133	193	3354	This study
Brachypodius_atriceps	GCA_013398615.1_ASM1339861v1	2923	2898	25	114	317	3354	This study
Copsychus_sechellarum	GCA_013398635.1_ASM1339863v1	3158	3135	23	81	115	3354	This study
Nesospiza_acunhae	GCA_013398715.1_ASM1339871v1	3083	3051	32	155	116	3354	This study
Nothocercus_julius	GCA_013398735.1_ASM1339873v1	3007	2989	18	180	167	3354	This study
Sapayoa_aenigma	GCA_013398745.1_ASM1339874v1	2989	2972	17	191	174	3354	This study
Elachura_formosa	GCA_013398795.1_ASM1339879v1	3062	2966	96	124	168	3354	This study
Ibidorhyncha_struthersii	GCA_013398815.1_ASM1339881v1	3051	3032	19	188	115	3354	This study
Emberiza_fucata	GCA_013398835.1_ASM1339883v1	2898	2873	25	231	225	3354	This study
Mohoua_ochrocephala	GCA_013398855.1_ASM1339885v1	2878	2859	19	295	181	3354	This study
Prunella_himalayana	GCA_013398875.1_ASM1339887v1	3055	3028	27	144	155	3354	This study
Dromas_ardeola	GCA_013398915.1_ASM1339891v1	2957	2941	16	261	136	3354	This study
Ceuthmochares_aereus	GCA_013398935.1_ASM1339893v1	2562	2551	11	426	366	3354	This study
Callaeas_wilsoni	GCA_013398955.1_ASM1339895v1	3024	3003	21	207	123	3354	This study
Catharus_fuscescens	GCA_013398975.1_ASM1339897v1	2929	2911	18	241	184	3354	This study
Alaudala_cheleensis	GCA_013398995.1_ASM1339899v1	2975	2948	27	203	176	3354	This study
Galbula_dea	GCA_013399015.1_ASM1339901v1	3167	3149	18	99	88	3354	This study
Quiscalus_mexicanus	GCA_013399035.1_ASM1339903v1	2750	2725	25	370	234	3354	This study
Ramphastos_sulfuratus	GCA_013399055.1_ASM1339905v1	2768	2749	19	404	182	3354	This study
Chloroceryle_aenea	GCA_013399075.1_ASM1339907v1	2779	2754	25	328	247	3354	This study
Psophia_crepitans	GCA_013399095.1_ASM1339909v1	2989	2973	16	233	132	3354	This study
Anseranas_semipalmata	GCA_013399115.1_ASM1339911v1	3092	3077	15	161	101	3354	This study
Heliornis_fulica	GCA_013399135.1_ASM1339913v1	2960	2942	18	224	170	3354	This study
Odontophorus_gujanensis	GCA_013399175.1_ASM1339917v1	3048	3033	15	148	158	3354	This study
Dicrurus_megarhynchus	GCA_013399195.1_ASM1339919v1	3126	3100	26	114	114	3354	This study
Spizaetus_tyrannus	GCA_013399215.1_ASM1339921v1	3134	3122	12	128	92	3354	This study
Rhipidura_dahli	GCA_013399225.1_ASM1339922v1	3093	3071	22	133	128	3354	This study
Trogon_melanurus	GCA_013399275.1_ASM1339927v1	3098	3075	23	129	127	3354	This study
Piprites_chloris	GCA_013399295.1_ASM1339929v1	3139	3124	15	96	119	3354	This study
Rostratula_benghalensis	GCA_013399305.1_ASM1339930v1	3136	3120	16	102	116	3354	This study
Fregetta_grallaria	GCA_013399335.1_ASM1339933v1	2886	2877	9	279	189	3354	This study
Herpetotheres_cachinnans	GCA_013399355.1_ASM1339935v1	3156	3141	15	107	91	3354	This study
Alopecoenas_beccarii	GCA_013399365.1_ASM1339936v1	3104	3089	15	159	91	3354	This study
Nyctiprogne_leucopyga	GCA_013399395.1_ASM1339939v1	2627	2606	21	440	287	3354	This study
Sagittarius_serpentarius	GCA_013399415.1_ASM1339941v1	2406	2392	14	625	323	3354	This study
Arenaria_interpres	GCA_013399435.1_ASM1339943v1	2828	2811	17	364	162	3354	This study
Anthoscopus_minutus	GCA_013399455.1_ASM1339945v1	2741	2725	16	361	252	3354	This study
Chauna_torquata	GCA_013399475.1_ASM1339947v1	2847	2831	16	335	172	3354	This study
Corythaixoides_concolor	GCA_013399495.1_ASM1339949v1	3148	3131	17	117	89	3354	This study
Sylvietta_virens	GCA_013399515.1_ASM1339951v1	3087	3063	24	109	158	3354	This study
Phaetusa_simplex	GCA_013399535.1_ASM1339953v1	2941	2920	21	221	192	3354	This study
Circaetus_pectoralis	GCA_013399555.1_ASM1339955v1	3157	3141	16	99	98	3354	This study
Podilymbus_podiceps	GCA_013399565.1_ASM1339956v1	3128	3110	18	113	113	3354	This study
Glaucidium_brasilianum	GCA_013399595.1_ASM1339959v1	3150	3137	13	109	95	3354	This study
Amazona_guildingii	GCA_013399615.1_ASM1339961v1	3062	3037	25	173	119	3354	This study
Chordeiles_acutipennis	GCA_013399635.1_ASM1339963v1	3063	3044	19	158	133	3354	This study
Setophaga_kirtlandii	GCA_013399655.1_ASM1339965v1	2994	2974	20	205	155	3354	This study
Mesembrinibis_cayennensis	GCA_013399675.1_ASM1339967v1	3047	3027	20	206	101	3354	This study
Formicarius_rufipectus	GCA_013399695.1_ASM1339969v1	3099	3084	15	113	142	3354	This study
Alectura_lathami	GCA_013399715.1_ASM1339971v1	2834	2813	21	309	211	3354	This study
Tyrannus_savana	GCA_013399735.1_ASM1339973v1	3030	3015	15	184	140	3354	This study
Podargus_strigoides	GCA_013399755.1_ASM1339975v1	2750	2733	17	378	226	3354	This study
Semnornis_frantzii	GCA_013399775.1_ASM1339977v1	1868	1854	14	845	641	3354	This study
Zosterops_hypoxanthus	GCA_013399795.1_ASM1339979v1	2973	2954	19	226	155	3354	This study
Leptocoma_aspasia	GCA_013399835.1_ASM1339983v1	3089	3063	26	140	125	3354	This study
Oxyruncus_cristatus	GCA_013399855.1_ASM1339985v1	3113	3102	11	116	125	3354	This study
Gymnorhina_tibicen	GCA_013399875.1_ASM1339987v1	3093	3071	22	133	128	3354	This study
Serilophus_lunatus	GCA_013399895.1_ASM1339989v1	3092	3077	15	130	132	3354	This study
Illadopsis_cleaveri	GCA_013399915.1_ASM1339991v1	2955	2938	17	218	181	3354	This study
Cinclus_mexicanus	GCA_013399935.1_ASM1339993v1	2711	2698	13	388	255	3354	This study
Ploceus_nigricollis	GCA_013399945.1_ASM1339994v1	3019	2996	23	180	155	3354	This study
Indicator_maculatus	GCA_013399975.1_ASM1339997v1	3033	3012	21	190	131	3354	This study
Oenanthe_oenanthe	GCA_013399995.1_ASM1339999v1	3023	2998	25	167	164	3354	This study
Rynchops_niger	GCA_013400035.1_ASM1340003v1	3091	3069	22	153	110	3354	This study
Nycticryphes_semicollaris	GCA_013400055.1_ASM1340005v1	3137	3118	19	108	109	3354	This study
Hippolais_icterina	GCA_013400075.1_ASM1340007v1	2971	2946	25	201	182	3354	This study
Himantopus_himantopus	GCA_013400095.1_ASM1340009v1	3099	3077	22	156	99	3354	This study
Rhinopomastus_cyanomelas	GCA_013400115.1_ASM1340011v1	3082	3064	18	150	122	3354	This study
Rhinoptilus_africanus	GCA_013400135.1_ASM1340013v1	2958	2937	21	240	156	3354	This study
Locustella_ochotensis	GCA_013400155.1_ASM1340015v1	3059	3038	21	147	148	3354	This study
Phainopepla_nitens	GCA_013400175.1_ASM1340017v1	2980	2957	23	211	163	3354	This study
Aramus_guarauna	GCA_013400195.1_ASM1340019v1	3104	3088	16	141	109	3354	This study
Cisticola_juncidis	GCA_013400215.1_ASM1340021v1	2984	2966	18	195	175	3354	This study
Oriolus_oriolus	GCA_013400235.1_ASM1340023v1	3040	3020	20	157	157	3354	This study
Sitta_europaea	GCA_013400255.1_ASM1340025v1	2983	2958	25	216	155	3354	This study
Rhadina_sibilatrix	GCA_013400275.1_ASM1340027v1	2958	2934	24	205	191	3354	This study
Larus_smithsonianus	GCA_013400295.1_ASM1340029v1	2472	2457	15	609	273	3354	This study
Bombycilla_garrulus	GCA_013400315.1_ASM1340031v1	3008	2989	19	187	159	3354	This study
Eurystomus_gularis	GCA_013400335.1_ASM1340033v1	2879	2865	14	319	156	3354	This study
Certhia_brachydactyla	GCA_013400355.1_ASM1340035v1	3105	3086	19	124	125	3354	This study
Thinocorus_orbignyianus	GCA_013400375.1_ASM1340037v1	3097	3076	21	140	117	3354	This study
Vidua_macroura	GCA_013400395.1_ASM1340039v1	2619	2599	20	437	298	3354	This study
Scytalopus_superciliaris	GCA_013400415.1_ASM1340041v1	3025	3001	24	175	154	3354	This study
Pycnonotus_jocosus	GCA_013400435.1_ASM1340043v1	2875	2847	28	282	197	3354	This study
Leiothrix_lutea	GCA_013400445.1_ASM1340044v1	2789	2763	26	313	252	3354	This study
Tricholaema_leucomelas	GCA_013400475.1_ASM1340047v1	3055	3035	20	183	116	3354	This study
Nicator_chloris	GCA_013400495.1_ASM1340049v1	2647	2626	21	440	267	3354	This study
Erpornis_zantholeuca	GCA_013400515.1_ASM1340051v1	2662	2648	14	421	271	3354	This study
Scopus_umbretta	GCA_013400535.1_ASM1340053v1	2140	2119	21	759	455	3354	This study
Jacana_jacana	GCA_013400555.1_ASM1340055v1	2577	2559	18	495	282	3354	This study
Peucedramus_taeniatus	GCA_013400575.1_ASM1340057v1	2769	2754	15	358	227	3354	This study
Chloropsis_cyanopogon	GCA_013400585.1_ASM1340058v1	2485	2466	19	491	378	3354	This study
Syrrhaptes_paradoxus	GCA_013400615.1_ASM1340061v1	2467	2451	16	554	333	3354	This study
Hypocryptadius_cinnamomeus	GCA_013400635.1_ASM1340063v1	2236	2213	23	633	485	3354	This study
Mystacornis_crossleyi	GCA_013400655.1_ASM1340065v1	1787	1773	14	951	616	3354	This study
Oxylabes_madagascariensis	GCA_013400675.1_ASM1340067v1	1411	1400	11	1083	860	3354	This study
Neodrepanis_coruscans	GCA_013400695.1_ASM1340069v1	1350	1339	11	1068	936	3354	This study
Prunella_fulvescens	GCA_013400715.1_ASM1340071v1	2702	2682	20	412	240	3354	This study
Pomatostomus_ruficeps	GCA_013400735.1_ASM1340073v1	2584	2565	19	485	285	3354	This study
Pelecanoides_urinatrix	GCA_013400755.1_ASM1340075v1	3034	3022	12	212	108	3354	This study
Chaetops_frenatus	GCA_013400775.1_ASM1340077v1	2821	2804	17	314	219	3354	This study
Pluvianellus_socialis	GCA_013400795.1_ASM1340079v1	2892	2878	14	320	142	3354	This study
Centropus_bengalensis	GCA_013400815.1_ASM1340081v1	2946	2923	23	222	186	3354	This study
Zapornia_atra	GCA_013400835.1_ASM1340083v1	2651	2636	15	439	264	3354	This study
Buphagus_erythrorhynchus	GCA_013400855.1_ASM1340085v1	1948	1933	15	843	563	3354	This study
Anhinga_rufa	GCA_013400875.1_ASM1340087v1	1697	1686	11	904	753	3354	This study
Thalassarche_chlororhynchos	GCA_013400895.1_ASM1340089v1	1926	1907	19	793	635	3354	This study
Pardalotus_punctatus	GCA_013400915.1_ASM1340091v1	2924	2901	23	235	195	3354	This study
Turnix_velox	GCA_013400935.1_ASM1340093v1	2718	2706	12	390	246	3354	This study
Drymodes_brunneopygia	GCA_013400955.1_ASM1340095v1	2863	2838	25	280	211	3354	This study
Atrichornis_clamosus	GCA_013400975.1_ASM1340097v1	3082	3063	19	164	108	3354	This study
Oreotrochilus_melanogaster	GCA_013400995.1_ASM1340099v1	2651	2636	15	425	278	3354	This study
Rissa_tridactyla	GCA_013401015.1_ASM1340101v1	3197	3175	22	75	82	3354	This study
Horornis_vulcanius	GCA_013401035.1_ASM1340103v1	1450	1431	19	1122	782	3354	This study
Uria_aalge	GCA_013401055.1_ASM1340105v1	3143	3127	16	114	97	3354	This study
Cepphus_grylle	GCA_013401065.1_ASM1340106v1	3203	3183	20	68	83	3354	This study
Passerina_amoena	GCA_013401095.1_ASM1340109v1	2667	2649	18	364	323	3354	This study
Calonectris_borealis	GCA_013401115.1_ASM1340111v1	2742	2722	20	429	183	3354	This study
Cettia_cetti	GCA_013401135.1_ASM1340113v1	2944	2925	19	281	129	3354	This study
Xiphorhynchus_elegans	GCA_013401175.1_ASM1340117v1	2650	2634	16	441	263	3354	This study
Pomatorhinus_ruficollis	GCA_013401195.1_ASM1340119v1	2918	2900	18	205	231	3354	This study
Atlantisia_rogersi	GCA_013401215.1_ASM1340121v1	2145	2129	16	827	382	3354	This study
Pteruthius_melanotis	GCA_013401235.1_ASM1340123v1	3116	3085	31	99	139	3354	This study
Urocolius_indicus	GCA_013401255.1_ASM1340125v1	2997	2977	20	224	133	3354	This study
Pandion_haliaetus	GCA_013401275.1_ASM1340127v1	2214	2199	15	682	458	3354	This study
Glareola_pratincola	GCA_013401295.1_ASM1340129v1	3005	2986	19	168	181	3354	This study
Balaeniceps_rex	GCA_013401315.1_ASM1340131v1	2152	2131	21	698	504	3354	This study
Brachypteracias_leptosomus	GCA_013401335.1_ASM1340133v1	2790	2771	19	350	214	3354	This study
Ceyx_cyanopectus	GCA_013401355.1_ASM1340135v1	2060	2041	19	755	539	3354	This study
Spizella_passerina	GCA_013401375.1_ASM1340137v1	1386	1363	23	981	987	3354	This study
Ara_glaucogularis	GCA_013433245.1_TAMU_Btm_v1.0	3248	3229	19	34	72	3354	This study
Labeo_gonius	GCA_013461565.1_ASM1346156v1	821	800	21	1531	1002	3354	This study
Clarias_magur	GCA_013621035.1_C_magur1.0	3218	3178	40	45	91	3354	This study
Myotis_myotis	GCA_014108235.1_mMyoMyo1.p	3282	3129	153	40	32	3354	This study
Pipistrellus_kuhlii	GCA_014108245.1_mPipKuh1.p	3279	3206	73	33	42	3354	This study
Molossus_molossus	GCA_014108415.1_mMolMol1.p	3286	3195	91	29	39	3354	This study
Rousettus_aegyptiacus	GCA_014176215.1_mRouAeg1.p	3265	3243	22	41	48	3354	This study
Dicerorhinus_sumatrensis_harrissoni	GCA_014189135.1_NRM_Dsumatrensis_v1.fasta	3280	3246	34	34	40	3354	This study
Elephas_maximus	GCA_014332765.1_ASM1433276v1	3237	3197	40	72	45	3354	This study
Aspidoscelis_marmoratus	GCA_014337955.1_AspMar1.0	3269	3250	19	34	51	3354	This study
Cygnus_cygnus	GCA_014362685.1_C_cygnus_scaffold_01	2677	2657	20	416	261	3354	This study
Columba_janthina_nitens	GCA_014362705.1_C_janthina_scaffold_01	2874	2854	20	316	164	3354	This study
Corvus_macrorhynchos	GCA_014363025.1_C_macrorhynchos_scaffold_01	2916	2901	15	248	190	3354	This study
Fratercula_cirrhata	GCA_014363165.1_F_cirrhata_scaffold_01	2618	2606	12	458	278	3354	This study
Haliaeetus_pelagicus	GCA_014363185.1_H_pelagicus_scaffold_01	3022	2996	26	232	100	3354	This study
Leucopsar_rothschildi	GCA_014363365.1_L_rothschildi_scaffold_01	2968	2952	16	216	170	3354	This study
Phoebastria_albatrus	GCA_014363385.1_P_albatrus_scaffold_01	2835	2813	22	346	173	3354	This study
Pteropus_pselaphon	GCA_014363405.1_P_pselaphon_scaffold_01	3186	3162	24	106	62	3354	This study
Uria_aalge_inornata	GCA_014363425.1_U_aalge_scaffold_01	2331	2318	13	621	402	3354	This study
Ursus_thibetanus_japonicus	GCA_014364545.1_U_thibetanus_scaffold_01	2725	2703	22	490	139	3354	This study
Eleutheronema_tetradactylum	GCA_014490765.1_CUHK_ma_10x	2799	2639	160	344	211	3354	This study
Cardinalis_cardinalis	GCA_014549065.1_CCar_1.0	3112	3090	22	103	139	3354	This study
Manis_javanica	GCA_014570535.1_YNU_ManJav_2.0	3200	3143	57	93	61	3354	This study
Manis_pentadactyla	GCA_014570555.1_YNU_ManPten_2.0	3229	3156	73	57	68	3354	This study
Oryzias_celebensis	GCA_014656515.1_OryCel_1.0	3274	3247	27	28	52	3354	This study
Lycocorax_pyrrhopterus_obiensis	GCA_014706295.1_ASM1470629v1	3179	3145	34	52	123	3354	This study
Silurus_glanis	GCA_014706435.1_S_gla_Hod_UTU_1.0	2863	2837	26	302	189	3354	This study
Oryx_dammah	GCA_014754425.2_SCBI_Odam_1.1	3263	3131	132	48	43	3354	This study
Lucifuga_dentata	GCA_014773175.1_Ldentata1.0	3072	3053	19	205	77	3354	This study
Passer_montanus	GCA_014805655.1_ASM1480565v1	3168	3148	20	91	95	3354	This study
Sturnira_hondurensis	GCA_014824575.2_WHU_Shon_v2.1	3228	3188	40	38	88	3354	This study
Artibeus_jamaicensis	GCA_014825515.1_WHU_Ajam_v2	3228	3189	39	73	53	3354	This study
Odontesthes_bonariensis	GCA_014825785.1_GWU_Obon_1.1	2752	2732	20	404	198	3354	This study
Cercopithecus_mona	GCA_014849445.1_KIZ_CMon_1.0	3197	3082	115	67	90	3354	This study
Microtus_fortis	GCA_014885135.1_M_Fortis_MF-2015_v1	3237	3137	100	61	56	3354	This study
Talpa_occidentalis	GCA_014898055.1_MPIMG_talOcc4	3275	3168	107	32	47	3354	This study
Puma_yagouaroundi	GCA_014898765.1_PumYag	3227	3191	36	80	47	3354	This study
Rangifer_tarandus_granti	GCA_014898785.1_LSU_RangTar_1.0	3245	3076	169	61	48	3354	This study
Kobus_leche_leche	GCA_014926565.1_Klec_v1.0	3188	3082	106	96	70	3354	This study
Oreochromis_tanganicae	GCA_015052225.1_JAB6.scf	2658	2638	20	518	178	3354	This study
Cyprichromis_pavo	GCA_015052265.1_JEB2.scf	2381	2360	21	713	260	3354	This study
Hemibates_koningsi	GCA_015052305.1_IZA5.scf	2453	2437	16	670	231	3354	This study
Lamprologus_callipterus	GCA_015052345.1_IPH2.scf	2475	2460	15	630	249	3354	This study
Limnochromis_abeelei	GCA_015052385.1_ITB4.scf	2510	2492	18	612	232	3354	This study
Altolamprologus_calvus	GCA_015052405.1_IOE3.scf	2371	2349	22	723	260	3354	This study
Pseudosimochromis_curvifrons	GCA_015052425.1_AYC7.scf	2449	2433	16	673	232	3354	This study
Cyprichromis_zonatus	GCA_015052445.1_GPC9.scf	2543	2522	21	604	207	3354	This study
Lamprologus_ocellatus	GCA_015052485.1_ILD3.scf	2242	2222	20	807	305	3354	This study
Gnathochromis_pfefferi	GCA_015052505.1_AWB7.scf	2480	2462	18	635	239	3354	This study
Petrochromis_sp_orthognathus_ikola_AB-2019	GCA_015052525.1_LFA8.scf	2387	2357	30	698	269	3354	This study
Neolamprologus_devosi	GCA_015052545.1_LEH2.scf	2449	2430	19	650	255	3354	This study
Pseudosimochromis_marginatus	GCA_015052565.1_KCE7.scf	2595	2573	22	560	199	3354	This study
Benitochromis_conjunctus	GCA_015052645.1_JWE4.scf	2553	2527	26	584	217	3354	This study
Apistogramma_diplotaenia	GCA_015052665.1_JWD9.scf	2697	2684	13	469	188	3354	This study
Julidochromis_sp_unterfels_AB-2019	GCA_015052685.1_JWA2.scf	2481	2460	21	637	236	3354	This study
Tropheus_sp_black	GCA_015052705.1_JVC3.scf	2567	2547	20	596	191	3354	This study
Chaenogobius_annularis	GCA_015082035.1_agohaze_1	3098	3039	59	92	164	3354	This study
Chalinochromis_brichardi	GCA_015102055.1_AVA9.scf	2365	2340	25	728	261	3354	This study
Xenotilapia_sima	GCA_015102085.1_IUF7.scf	2366	2353	13	730	258	3354	This study
Lepidiolamprologus_elongatus	GCA_015102115.1_AUG8.scf	2295	2277	18	738	321	3354	This study
Neolamprologus_fasciatus	GCA_015102195.1_AUE7.scf	2393	2378	15	689	272	3354	This study
Variabilichromis_moorii	GCA_015102225.1_AUC3.scf	2520	2501	19	601	233	3354	This study
Aulonocranus_dewindti	GCA_015102295.1_AUA9.scf	2347	2331	16	717	290	3354	This study
Neolamprologus_hecqui	GCA_015102335.1_A142.scf	2440	2423	17	663	251	3354	This study
Neolamprologus_nigriventris	GCA_015102355.1_A108.scf	2438	2420	18	671	245	3354	This study
Tilapia_brevimanus	GCA_015102415.1_JWF9.scf	2733	2704	29	457	164	3354	This study
Neolamprologus_sexfasciatus	GCA_015102515.1_IND7.scf	2299	2272	27	735	320	3354	This study
Neolamprologus_modestus	GCA_015102555.1_IMH3.scf	2433	2418	15	664	257	3354	This study
Xenotilapia_nasus	GCA_015102635.1_IMF8.scf	2426	2409	17	665	263	3354	This study
Neolamprologus_obscurus	GCA_015102675.1_IMA2.scf	2344	2329	15	709	301	3354	This study
Lepidiolamprologus_kendalli	GCA_015102695.1_IMD1.scf	2440	2423	17	666	248	3354	This study
Telmatochromis_temporalis	GCA_015102735.1_IMB4.scf	2367	2346	21	692	295	3354	This study
Benthochromis_melanoides	GCA_015102775.1_ILG3.scf	2458	2445	13	663	233	3354	This study
Bathybates_graueri	GCA_015102795.1_ILG7.scf	2292	2278	14	754	308	3354	This study
Benthochromis_horii	GCA_015102815.1_ILF8.scf	2478	2464	14	636	240	3354	This study
Neolamprologus_sp_kombe_AB-2019	GCA_015102855.1_ILE6.scf	2344	2325	19	690	320	3354	This study
Bathybates_leo	GCA_015102875.1_ILF7.scf	2104	2089	15	883	367	3354	This study
Julidochromis_sp_kombe_AB-2019	GCA_015102915.1_ILD9.scf	2293	2272	21	767	294	3354	This study
Neolamprologus_mustax	GCA_015102955.1_ILB4.scf	2342	2323	19	729	283	3354	This study
Telmatochromis_sp_lufubu_AB-2019	GCA_015102975.1_HXC8.scf	2356	2343	13	703	295	3354	This study
Neolamprologus_brevis	GCA_015103015.1_ILB6.scf	2233	2209	24	780	341	3354	This study
Neolamprologus_calliurus	GCA_015103035.1_ILA7.scf	2422	2405	17	671	261	3354	This study
Orthochromis_indermauri	GCA_015103075.1_HXC6.scf	2393	2373	20	722	239	3354	This study
Haplochromis_sp_Chipwa	GCA_015103095.1_HXC5.scf	2502	2481	21	637	215	3354	This study
Julidochromis_transcriptus	GCA_015103115.1_HFG1287.scf	2485	2464	21	636	233	3354	This study
Petrochromis_fasciolatus	GCA_015103155.1_GPH7.scf	2368	2344	24	691	295	3354	This study
Xenotilapia_sp_papilio_sunflower	GCA_015103175.1_GPF9.scf	2248	2230	18	788	318	3354	This study
Neolamprologus_cylindricus	GCA_015103235.1_GPH2.scf	2463	2449	14	641	250	3354	This study
Paracyprichromis_nigripinnis	GCA_015103275.1_GPC4.scf	2517	2496	21	626	211	3354	This study
Ptychochromis_oligocanthus	GCA_015103295.1_FPO1.scf	1772	1747	25	1073	509	3354	This study
Trematochromis_benthicola	GCA_015103355.1_DMD1.scf	2519	2497	22	621	214	3354	This study
Callochromis_macrops	GCA_015103395.1_BND5.scf	2354	2332	22	731	269	3354	This study
Enantiopus_melanogenys	GCA_015103415.1_BNC5.scf	2314	2297	17	761	279	3354	This study
Trematocara_variabile	GCA_015103455.1_Bel33.scf	1409	1398	11	1179	766	3354	This study
Cyprichromis_sp_kibishi_AB-2019	GCA_015103475.1_Bel16.scf	2185	2156	29	846	323	3354	This study
Ophthalmotilapia_heterodonta	GCA_015103535.1_Bel12.scf	2179	2167	12	861	314	3354	This study
Chalinochromis_popelini	GCA_015103555.1_Bel09.scf	2254	2235	19	800	300	3354	This study
Xenotilapia_sp_kilesa_AB-2019	GCA_015103635.1_Bel01.scf	2404	2390	14	700	250	3354	This study
Cyathopharynx_furcifer	GCA_015103655.1_AYE5.scf	2399	2380	19	691	264	3354	This study
Ophthalmotilapia_nasuta	GCA_015103715.1_AXH8.scf	2350	2331	19	711	293	3354	This study
Ctenochromis_horei	GCA_015103775.1_AXA7.scf	2486	2466	20	651	217	3354	This study
Xenotilapia_spiloptera	GCA_015103795.1_AXB5.scf	2295	2276	19	784	275	3354	This study
Limnotilapia_dardennii	GCA_015103815.1_AWI5.scf	2478	2458	20	648	228	3354	This study
Petrochromis_polyodon	GCA_015103915.1_AWB9.scf	2480	2460	20	645	229	3354	This study
Lepidiolamprologus_attenuatus	GCA_015103955.1_AVG5.scf	2382	2367	15	689	283	3354	This study
Neolamprologus_crassus	GCA_015104075.1_IVF1.scf	2408	2393	15	668	278	3354	This study
Xenotilapia_bathyphilus	GCA_015104175.1_IVB4.scf	2427	2410	17	681	246	3354	This study
Reganochromis_calliurus	GCA_015104255.1_IUI4.scf	2475	2455	20	651	228	3354	This study
Trematocara_nigrifrons	GCA_015104335.1_IUE5.scf	1998	1979	19	912	444	3354	This study
Trematocara_macrostoma	GCA_015104355.1_IUD9.scf	2035	2015	20	906	413	3354	This study
Bathybates_fasciatus	GCA_015104405.1_ITH3.scf	2341	2322	19	731	282	3354	This study
Neolamprologus_christyi	GCA_015104465.1_ITG2.scf	2365	2352	13	700	289	3354	This study
Limnochromis_staneri	GCA_015104515.1_ITA6.scf	2608	2588	20	566	180	3354	This study
Gnathochromis_permaxillaris	GCA_015104535.1_ITA4.scf	2504	2485	19	633	217	3354	This study
Limnochromis_auritus	GCA_015104565.1_ITB1.scf	2558	2539	19	593	203	3354	This study
Lobochilotes_labiatus	GCA_015104595.1_ISD8.scf	2434	2412	22	675	245	3354	This study
Cyprichromis_leptosoma	GCA_015104635.1_ISI2.scf	2402	2383	19	714	238	3354	This study
Altolamprologus_compressiceps	GCA_015104655.1_ISC9.scf	2385	2365	20	698	271	3354	This study
Julidochromis_ornatus	GCA_015104675.1_ISC1.scf	2368	2346	22	699	287	3354	This study
Neolamprologus_pulcher	GCA_015104715.1_ISB3.scf	2371	2349	22	705	278	3354	This study
Neolamprologus_savoryi	GCA_015104745.1_ISA8.scf	2384	2362	22	700	270	3354	This study
Trematocara_marginatum	GCA_015104795.1_ISA3.scf	2049	2034	15	871	434	3354	This study
Telmatochromis_sp_shell_AB-2019	GCA_015104875.1_IRI8.scf	2381	2361	20	688	285	3354	This study
Altolamprologus_sp_compressiceps_shell_AB-2019	GCA_015104895.1_IRH2.scf	2053	2030	23	882	419	3354	This study
Neolamprologus_multifasciatus	GCA_015104955.1_IRF8.scf	2072	2053	19	893	389	3354	This study
Xenotilapia_singularis	GCA_015104975.1_IRD9.scf	2074	2051	23	895	385	3354	This study
Ectodus_descampsii	GCA_015104995.1_IRD7.scf	2444	2424	20	669	241	3354	This study
Julidochromis_dickfeldi	GCA_015105015.1_IRC4.scf	2425	2404	21	692	237	3354	This study
Julidochromis_sp_regani_south_AB-2019	GCA_015105035.1_IRB8.scf	2323	2304	19	717	314	3354	This study
Lestradea_perspicax	GCA_015105095.1_IRA2.scf	2288	2271	17	741	325	3354	This study
Ophthalmotilapia_ventralis	GCA_015105175.1_IQD3.scf	2231	2216	15	794	329	3354	This study
Perissodus_microlepis	GCA_015105195.1_IQC4.scf	2509	2487	22	633	212	3354	This study
Paracyprichromis_sp_brieni_south_AB-2019	GCA_015105235.1_IQB9.scf	2389	2372	17	716	249	3354	This study
Haplotaxodon_microlepis	GCA_015105255.1_IQB8.scf	2594	2576	18	582	178	3354	This study
Haplotaxodon_trifasciatus	GCA_015105275.1_IQB6.scf	2348	2329	19	725	281	3354	This study
Neolamprologus_caudopunctatus	GCA_015105295.1_IQA3.scf	2422	2405	17	689	243	3354	This study
Neolamprologus_tetracanthus	GCA_015105335.1_IPG3.scf	2464	2443	21	617	273	3354	This study
Xenotilapia_boulengeri	GCA_015105375.1_IPE7.scf	2283	2266	17	768	303	3354	This study
Petrochromis_trewavasae_ephippium	GCA_015105435.1_IPC1.scf	2475	2452	23	651	228	3354	This study
Interochromis_loocki	GCA_015105475.1_IPB6.scf	2497	2482	15	630	227	3354	This study
Lepidiolamprologus_cunningtoni	GCA_015105495.1_IOH5.scf	2445	2428	17	657	252	3354	This study
Tropheus_sp_red_AB-2019	GCA_015105585.1_IOD9.scf	2465	2445	20	659	230	3354	This study
Cyathopharynx_foae	GCA_015105635.1_IOD4.scf	2285	2272	13	775	294	3354	This study
Cyphotilapia_gibberosa	GCA_015105655.1_INH7.scf	2539	2516	23	604	211	3354	This study
Cyprichromis_sp_jumbo_AB-2019	GCA_015105695.1_INH1.scf	2567	2543	24	574	213	3354	This study
Plecodus_straeleni	GCA_015105735.1_INE8.scf	2572	2551	21	585	197	3354	This study
Xenotilapia_leptura	GCA_015105755.1_INF1.scf	2289	2274	15	779	286	3354	This study
Xenotilapia_rotundiventralis	GCA_015105935.1_JBE7.scf	2349	2331	18	750	255	3354	This study
Xenotilapia_flavipinnis	GCA_015105975.1_JAF7.scf	2396	2379	17	729	229	3354	This study
Perissodus_multidentatus	GCA_015106075.1_IZA8.scf	2584	2566	18	587	183	3354	This study
Xenotilapia_nigrolabiata	GCA_015106095.1_IXF4.scf	2462	2447	15	651	241	3354	This study
Hemibates_stenosoma	GCA_015106175.1_IXC2.scf	2299	2282	17	767	288	3354	This study
Xenotilapia_caudafasciata	GCA_015106215.1_IXC1.scf	2427	2412	15	700	227	3354	This study
Greenwoodochromis_bellcrossi	GCA_015106255.1_IXB5.scf	2639	2622	17	524	191	3354	This study
Trematocara_unimaculatum	GCA_015106295.1_IXA6.scf	2098	2082	16	831	425	3354	This study
Cunningtonia_longiventralis	GCA_015106375.1_IWD8.scf	2247	2225	22	772	335	3354	This study
Lamprologus_signatus	GCA_015106455.1_IWD6.scf	2476	2456	20	622	256	3354	This study
Petrochromis_horii	GCA_015106495.1_IWB6.scf	2515	2498	17	615	224	3354	This study
Neolamprologus_prochilus	GCA_015106535.1_IVH1.scf	2284	2261	23	770	300	3354	This study
Haplochromis_vanheusdeni	GCA_015106555.1_JWG3.scf	2207	2187	20	809	338	3354	This study
Tropheus_annectens	GCA_015106575.1_JWG4.scf	2557	2540	17	587	210	3354	This study
Xenotilapia_papilio	GCA_015106585.1_IVF4.scf	2391	2370	21	715	248	3354	This study
Thoracochromis_brauschi	GCA_015106615.1_JWF8.scf	2489	2471	18	663	202	3354	This study
Sargochromis_carlottae	GCA_015106635.1_JWF4.scf	2521	2503	18	622	211	3354	This study
Coptodon_bakossiorum	GCA_015106655.1_JWE5.scf	2706	2688	18	484	164	3354	This study
Pelmatolapia_mariae	GCA_015106675.1_JWF2.scf	2691	2671	20	519	144	3354	This study
Serranochromis_macrocephalus	GCA_015106695.1_JWF5.scf	2517	2499	18	641	196	3354	This study
Bujurquina_vittata	GCA_015106715.1_JWD8.scf	2613	2596	17	553	188	3354	This study
Paratilapia_polleni	GCA_015106735.1_JWD5.scf	2411	2391	20	699	244	3354	This study
Etia_nguti	GCA_015106755.1_JWD3.scf	2740	2722	18	458	156	3354	This study
Etroplus_canarensis	GCA_015106775.1_JWD4.scf	2196	2177	19	854	304	3354	This study
Xenotilapia_ochrogenys	GCA_015106855.1_JVH4.scf	2317	2299	18	751	286	3354	This study
Lestradea_stappersii	GCA_015106895.1_JVH2.scf	2352	2335	17	738	264	3354	This study
Cyprichromis_microlepidotus	GCA_015106915.1_JVF2.scf	2377	2359	18	729	248	3354	This study
Neolamprologus_mondabu	GCA_015106975.1_JVB4.scf	2442	2427	15	658	254	3354	This study
Pseudosimochromis_babaulti	GCA_015107015.1_JUA4.scf	2572	2552	20	583	199	3354	This study
Neolamprologus_buescheri	GCA_015107095.1_JEI5.scf	2303	2279	24	760	291	3354	This study
Triglachromis_otostigma	GCA_015107115.1_JEG5.scf	2389	2372	17	707	258	3354	This study
Neolamprologus_sp_ventralis_stripe_AB-2019	GCA_015107155.1_JED5.scf	2425	2407	18	668	261	3354	This study
Cyprichromis_coloratus	GCA_015107215.1_JEC7.scf	2558	2536	22	579	217	3354	This study
Plecodus_paradoxus	GCA_015107295.1_JDI4.scf	2551	2529	22	611	192	3354	This study
Lamprologus_laparogramma	GCA_015107315.1_JDI2.scf	2421	2403	18	675	258	3354	This study
Neolamprologus_meeli	GCA_015107355.1_JDF4.scf	2442	2425	17	648	264	3354	This study
Lamprologus_sp_ornatipinnis_zambia_AB-2019	GCA_015107375.1_JDF5.scf	2320	2297	23	761	273	3354	This study
Bathybates_vittatus	GCA_015107455.1_JDE6.scf	2238	2223	15	797	319	3354	This study
Bathybates_hornii	GCA_015107495.1_JDE4.scf	2351	2334	17	726	277	3354	This study
Grammatotria_lemairii	GCA_015107505.1_JDD7.scf	2588	2571	17	573	193	3354	This study
Boulengerochromis_microlepis	GCA_015107555.1_JCF2.scf	2609	2590	19	568	177	3354	This study
Telmatochromis_vittatus	GCA_015107575.1_JBD6.scf	2450	2428	22	640	264	3354	This study
Bathybates_minor	GCA_015107595.1_JBG3.scf	2251	2231	20	802	301	3354	This study
Telmatochromis_brachygnathus	GCA_015107635.1_JBE9.scf	2395	2379	16	692	267	3354	This study
Xenochromis_hecqui	GCA_015107655.1_JAH7.scf	2534	2515	19	616	204	3354	This study
Tylochromis_polylepis	GCA_015107715.1_JAG2.scf	2392	2373	19	718	244	3354	This study
Baileychromis_centropomoides	GCA_015107735.1_JAE9.scf	2537	2520	17	617	200	3354	This study
Lamprologus_lemairii	GCA_015107875.1_IZI7.scf	2248	2229	19	776	330	3354	This study
Eretmodus_cyanostictus	GCA_015107895.1_IZH7.scf	2559	2538	21	595	200	3354	This study
Greenwoodochromis_christyi	GCA_015107935.1_IZE4.scf	2597	2581	16	566	191	3354	This study
Perissodus_eccentricus	GCA_015107955.1_IZB2.scf	2600	2581	19	565	189	3354	This study
Trematocara_stigmaticum	GCA_015107995.1_IZE1.scf	2056	2043	13	868	430	3354	This study
Julidochromis_marlieri	GCA_015108065.1_JXB5.scf	2465	2449	16	649	240	3354	This study
Petrochromis_famula	GCA_015108095.1_IYA7.scf	2448	2423	25	666	240	3354	This study
Neolamprologus_longicaudatus	GCA_015108155.1_JWI3.scf	2485	2465	20	621	248	3354	This study
Pelvicachromis_taeniatus	GCA_015108175.1_JWI4.scf	2617	2597	20	558	179	3354	This study
Neolamprologus_leleupi	GCA_015108215.1_JWH9.scf	2470	2451	19	641	243	3354	This study
Neolamprologus_olivaceous	GCA_015108255.1_JWH6.scf	2480	2459	21	634	240	3354	This study
Neolamprologus_gracilis	GCA_015108275.1_JWH2.scf	2481	2457	24	628	245	3354	This study
Neolamprologus_marunguensis	GCA_015108335.1_JWH4.scf	2431	2409	22	648	275	3354	This study
Neolamprologus_helianthus	GCA_015108395.1_JWG9.scf	2518	2500	18	602	234	3354	This study
Tilapia_sparmanii	GCA_015108415.1_JWF7.scf	2644	2623	21	531	179	3354	This study
Lamprologus_tigripictilis	GCA_015108455.1_JWF6.scf	2396	2379	17	689	269	3354	This study
Pharyngochromis_acuticeps	GCA_015108475.1_JWF3.scf	2492	2473	19	644	218	3354	This study
Heterochromis_multidens	GCA_015108495.1_JWF1.scf	2171	2152	19	863	320	3354	This study
Hemichromis_elongatus	GCA_015108515.1_JWE9.scf	2834	2821	13	386	134	3354	This study
Steatocranus_sp_ultraslender_AB-2019	GCA_015108535.1_JWE8.scf	2379	2360	19	719	256	3354	This study
Coptodon_rendalli	GCA_015108555.1_JWE6.scf	2738	2719	19	441	175	3354	This study
Heterotilapia_buettikoferi	GCA_015108575.1_JWE3.scf	2528	2508	20	635	191	3354	This study
Amphilophus_zaliosus	GCA_015108585.1_JWE1.scf	1913	1902	11	976	465	3354	This study
Australoheros_scitulus	GCA_015108615.1_JWE2.scf	2091	2079	12	900	363	3354	This study
Andinoacara_biseriatus	GCA_015108635.1_JWD7.scf	2623	2613	10	527	204	3354	This study
Paracyprichromis_sp_tembwe_AB-2019	GCA_015108655.1_JWD1.scf	2560	2539	21	595	199	3354	This study
Telmatochromis_sp_longola_AB-2019	GCA_015108675.1_JWC9.scf	2539	2520	19	580	235	3354	This study
Neolamprologus_variostigma	GCA_015108695.1_JWA6.scf	2446	2425	21	670	238	3354	This study
Lamprologus_meleagris	GCA_015108715.1_JWA9.scf	1992	1967	25	939	423	3354	This study
Neolamprologus_pectoralis	GCA_015108755.1_JWA7.scf	2447	2429	18	638	269	3354	This study
Lamprologus_sp_ornatipinnis_congo_AB-2019	GCA_015108835.1_JWA3.scf	2296	2276	20	762	296	3354	This study
Telmatochromis_brichardi	GCA_015108855.1_JVI9.scf	2396	2376	20	682	276	3354	This study
Spathodus_erythrodon	GCA_015108895.1_JUB6.scf	2440	2422	18	661	253	3354	This study
Telmatochromis_sp_dhonti_north_AB-2019	GCA_015108915.1_JUD5.scf	2487	2463	24	628	239	3354	This study
Neolamprologus_furcifer	GCA_015108955.1_JEI6.scf	2506	2489	17	611	237	3354	This study
Neolamprologus_chitamwebwai	GCA_015109035.1_KHA7.scf	2371	2354	17	695	288	3354	This study
Neolamprologus_tretocephalus	GCA_015109125.1_KFH5.scf	2410	2391	19	670	274	3354	This study
Tropheus_duboisi	GCA_015109155.1_KHA5.scf	2463	2445	18	663	228	3354	This study
Julidochromis_regani	GCA_015109195.1_KFF4.scf	2386	2369	17	683	285	3354	This study
Neolamprologus_walteri	GCA_015109215.1_KFD4.scf	2424	2405	19	669	261	3354	This study
Tropheus_sp_lukuga_AB-2019	GCA_015109315.1_KEF2.scf	2549	2531	18	593	212	3354	This study
Cyprichromis_sp_dwarf_jumbo_AB-2019	GCA_015109335.1_KFA7.scf	2594	2571	23	571	189	3354	This study
Chalinochromis_sp_ndobhoi_AB-2019	GCA_015109345.1_KEF1.scf	2244	2224	20	771	339	3354	This study
Neolamprologus_longior	GCA_015109375.1_KEH3.scf	2500	2479	21	617	237	3354	This study
Tropheus_sp_lunatus_AB-2019	GCA_015109455.1_KED6.scf	2359	2341	18	715	280	3354	This study
Neolamprologus_similis	GCA_015109475.1_KEC1.scf	2391	2369	22	700	263	3354	This study
Petrochromis_sp_kazumbae_AB-2019	GCA_015109515.1_KEB4.scf	2529	2512	17	615	210	3354	This study
Orthochromis_mazimeroensis	GCA_015109575.1_KDC6.scf	2335	2310	25	755	264	3354	This study
Neolamprologus_sp_brevis_magara_AB-2019	GCA_015109655.1_KCI6.scf	2479	2463	16	631	244	3354	This study
Lamprologus_speciosus	GCA_015109675.1_KCG2.scf	2416	2394	22	697	241	3354	This study
Neolamprologus_boulengeri	GCA_015109695.1_KCE5.scf	2304	2287	17	760	290	3354	This study
Cyphotilapia_sp_5-bar_frontosa_AB-2019	GCA_015109715.1_KAG3.scf	2618	2597	21	557	179	3354	This study
Neolamprologus_ventralis	GCA_015109735.1_KAG8.scf	2480	2463	17	648	226	3354	This study
Xenotilapia_longispinis	GCA_015109775.1_KAF6.scf	2460	2438	22	657	237	3354	This study
Cardiopharynx_schoutedeni	GCA_015109795.1_KAF2.scf	2404	2386	18	705	245	3354	This study
Callochromis_melanostigma	GCA_015109845.1_KAF3.scf	2246	2226	20	788	320	3354	This study
Astatoreochromis_straeleni	GCA_015109875.1_KAE8.scf	2333	2314	19	740	281	3354	This study
Lepidiolamprologus_profundicola	GCA_015109915.1_KAD2.scf	2448	2433	15	641	265	3354	This study
Lamprologus_ornatipinnis	GCA_015109935.1_JZF3.scf	2468	2446	22	640	246	3354	This study
Neolamprologus_pleuromaculatus	GCA_015109975.1_JZF2.scf	2466	2447	19	643	245	3354	This study
Xenotilapia_ornatipinnis	GCA_015110015.1_JZE6.scf	2437	2418	19	682	235	3354	This study
Callochromis_pleurospilus	GCA_015110035.1_JZE4.scf	2375	2354	21	699	280	3354	This study
Neolamprologus_toae	GCA_015110075.1_JZD6.scf	2515	2500	15	589	250	3354	This study
Spathodus_marlieri	GCA_015110135.1_JZD3.scf	2565	2547	18	587	202	3354	This study
Tanganicodus_irsacae	GCA_015110155.1_JYH3.scf	2476	2460	16	638	240	3354	This study
Tropheus_brichardi	GCA_015110215.1_JYI8.scf	2497	2481	16	629	228	3354	This study
Astatotilapia_stappersii	GCA_015110235.1_JYD3.scf	2491	2472	19	644	219	3354	This study
Ophthalmotilapia_sp_paranasuta_AB-2019	GCA_015110275.1_JYF7.scf	2463	2446	17	662	229	3354	This study
Paracyprichromis_brieni	GCA_015110335.1_JXI2.scf	2447	2422	25	673	234	3354	This study
Lamprologus_kungweensis	GCA_015110375.1_JXG8.scf	2487	2466	21	632	235	3354	This study
Petrochromis_orthognathus	GCA_015110415.1_JXH5.scf	2552	2534	18	606	196	3354	This study
Eretmodus_marksmithi	GCA_015110455.1_JXE9.scf	2542	2525	17	618	194	3354	This study
Neolamprologus_falcicula	GCA_015110515.1_JXD4.scf	2453	2430	23	656	245	3354	This study
Tropheus_sp_brichardi_kipili_AB-2019	GCA_015110695.1_LGA5.scf	2430	2405	25	683	241	3354	This study
Ophthalmotilapia_boops	GCA_015110735.1_LFI4.scf	2336	2319	17	733	285	3354	This study
Julidochromis_marksmithi	GCA_015110755.1_LFH1.scf	2444	2427	17	665	245	3354	This study
Lepidiolamprologus_kamambae	GCA_015110795.1_LFF8.scf	2389	2373	16	701	264	3354	This study
Trematocara_zebra	GCA_015110815.1_LFE4.scf	1864	1851	13	984	506	3354	This study
Neolamprologus_sp_cygnus_AB-2019	GCA_015110875.1_LFD4.scf	2407	2392	15	681	266	3354	This study
Neolamprologus_sp_eseki_AB-2019	GCA_015110915.1_LFB9.scf	2401	2386	15	665	288	3354	This study
Cyphotilapia_frontosa	GCA_015110975.1_LEI6.scf	2468	2447	21	652	234	3354	This study
Tropheus_polli	GCA_015111015.1_LEF8.scf	2558	2538	20	592	204	3354	This study
Benthochromis_sp_horii_mahale_AB-2019	GCA_015111075.1_LEF2.scf	2555	2538	17	585	214	3354	This study
Xenotilapia_sp_spilopterus_north_AB-2019	GCA_015111115.1_LEA3.scf	2241	2225	16	813	300	3354	This study
Neolamprologus_sp_caudopunctatus_kipili_AB-2019	GCA_015111175.1_LDG3.scf	2378	2364	14	717	259	3354	This study
Tropheus_sp_mpimbwe_AB-2019	GCA_015111195.1_LDI5.scf	2399	2378	21	715	240	3354	This study
Neolamprologus_sp_furcifer_ulwile_AB-2019	GCA_015111255.1_LDF5.scf	2339	2318	21	738	277	3354	This study
Chalinochromis_sp_bifrenatus	GCA_015111275.1_LDE1.scf	2373	2352	21	702	279	3354	This study
Petrochromis_sp_kipili_brown_AB-2019	GCA_015111315.1_LDE4.scf	2341	2323	18	725	288	3354	This study
Petrochromis_sp_giant_AB-2019	GCA_015111355.1_LDC6.scf	2474	2454	20	646	234	3354	This study
Lepidiolamprologus_mimicus	GCA_015111395.1_LDD6.scf	2361	2344	17	706	287	3354	This study
Benthochromis_tricoti	GCA_015111415.1_LDA7.scf	2369	2356	13	710	275	3354	This study
Petrochromis_macrognathus	GCA_015111435.1_LDA4.scf	2370	2351	19	722	262	3354	This study
Petrochromis_sp_moshi_yellow_AB-2019	GCA_015111455.1_LCF6.scf	2456	2437	19	647	251	3354	This study
Tropheus_sp_Kirschfleck	GCA_015111495.1_LCF1.scf	2505	2483	22	630	219	3354	This study
Petrochromis_sp_red_AB-2019	GCA_015111535.1_LCD5.scf	2334	2317	17	750	270	3354	This study
Bathybates_ferox	GCA_015111595.1_LCD6.scf	2162	2145	17	856	336	3354	This study
Neolamprologus_sp_gracilis_tanzania_AB-2019	GCA_015111615.1_LCC6.scf	2363	2345	18	714	277	3354	This study
Neolamprologus_sp_falcicula_mahale_AB-2019	GCA_015111635.1_LCB5.scf	2272	2255	17	755	327	3354	This study
Neolamprologus_leloupi	GCA_015111655.1_LCA2.scf	2393	2374	19	699	262	3354	This study
Telmatochromis_dhonti	GCA_015111745.1_LBF7.scf	2329	2314	15	736	289	3354	This study
Julidochromis_sp_marlieri_south_AB-2019	GCA_015111775.1_LBF3.scf	2452	2437	15	651	251	3354	This study
Oreochromis_malagarasi	GCA_015111835.1_KYH4.scf	2431	2405	26	659	264	3354	This study
Haplochromis_paludinosus	GCA_015111855.1_KYG1.scf	2309	2286	23	766	279	3354	This study
Orthochromis_uvinzae	GCA_015111895.1_KYE7.scf	2383	2364	19	725	246	3354	This study
Orthochromis_malagaraziensis	GCA_015111915.1_KYE2.scf	2400	2379	21	699	255	3354	This study
Neolamprologus_niger	GCA_015111955.1_KYA5.scf	2304	2286	18	754	296	3354	This study
Telmatochromis_bifrenatus	GCA_015111975.1_KYB8.scf	2456	2438	18	626	272	3354	This study
Ectodus_sp_north	GCA_015112095.1_KHC4.scf	2369	2352	17	715	270	3354	This study
Trematocara_caparti	GCA_015112415.1_LJC8.scf	1082	1062	20	1353	919	3354	This study
Telmatochromis_sp_dhonti_twiyu_AB-2019	GCA_015112475.1_LHC1.scf	2513	2488	25	603	238	3354	This study
Petrochromis_sp_polyodon_texas_AB-2019	GCA_015112515.1_LHB3.scf	2547	2525	22	592	215	3354	This study
Neolamprologus_petricola	GCA_015112555.1_LGI1.scf	2387	2371	16	680	287	3354	This study
Ophthalmotilapia_sp_white_cap_AB-2019	GCA_015112615.1_LGH1.scf	2384	2364	20	700	270	3354	This study
Chalinochromis_cyanophleps	GCA_015112635.1_LGG6.scf	2391	2370	21	685	278	3354	This study
Neolamprologus_timidus	GCA_015112655.1_LGE2.scf	2349	2331	18	729	276	3354	This study
Petrochromis_sp_macrognathus_rainbow_AB-2019	GCA_015112775.1_LGB8.scf	2392	2374	18	685	277	3354	This study
Astatotilapia_flaviijosephi	GCA_015112995.1_LJD2.scf	2068	2053	15	909	377	3354	This study
Neolamprologus_cancellatus	GCA_015113075.1_LJC9.scf	2100	2082	18	904	350	3354	This study
Tangachromis_dhanisi	GCA_015113095.1_LJA8.scf	2511	2492	19	637	206	3354	This study
Plecodus_elaviae	GCA_015113155.1_LHI6.scf	2419	2402	17	677	258	3354	This study
Lepidiolamprologus_sp_meeli_kipili_AB-2019	GCA_015113235.1_LHA5.scf	2319	2305	14	731	304	3354	This study
Neolamprologus_bifasciatus	GCA_015113255.1_LHF7.scf	2376	2355	21	700	278	3354	This study
Tropheus_sp_murago_AB-2019	GCA_015113295.1_LHD9.scf	2434	2416	18	669	251	3354	This study
Xenotilapia_tenuidentata	GCA_015118035.1_LHG6.scf	2385	2367	18	725	244	3354	This study
Pyrrhura_lepida	GCA_015163975.1_ASM1516397v1	2013	1999	14	929	412	3354	This study
Mormyrus_lacerda	GCA_015163995.1_ASM1516399v1	2437	2335	102	670	247	3354	This study
Brevimyrus_niger	GCA_015164015.1_ASM1516401v1	2370	2277	93	685	299	3354	This study
Tenualosa_ilisha	GCA_015244755.2_TenIli1.0	3251	2922	329	47	56	3354	This study
Laticauda_colubrina	GCA_015471245.1_latCor_2.0	3157	3133	24	101	96	3354	This study
Rousettus_leschenaultii	GCA_015472975.1_rouLes_1.0	3272	3250	22	39	43	3354	This study
Sarotherodon_lohbergeri	GCA_015708405.1_Z05.scf	2802	2782	20	404	148	3354	This study
Stomatepia_pindu	GCA_015708495.1_Z09.scf	2620	2603	17	530	204	3354	This study
Sarotherodon_caroli	GCA_015708515.1_Z17.scf	2646	2625	21	519	189	3354	This study
Pungu_maclareni	GCA_015708565.1_Z03.scf	2634	2614	20	526	194	3354	This study
Sarotherodon_steinbachi	GCA_015708585.1_Z07.scf	2715	2702	13	485	154	3354	This study
Potos_flavus	GCA_015708855.1_Pflavus_platanus500	3234	3209	25	66	54	3354	This study
Procyon_lotor	GCA_015708975.1_Plotor_platanus500	3119	3101	18	150	85	3354	This study
Argyrosomus_japonicus	GCA_015710095.1_ASM1571009v1	3313	3148	165	9	32	3354	This study
Cyprinodon_tularosa	GCA_016077235.1_ASM1607723v1	3263	3244	19	37	54	3354	This study
Hippotragus_equinus	GCA_016433095.1_ASM1643309v1	3225	3120	105	78	51	3354	This study
Pyrrhura_cruentata	GCA_016545565.1_ASM1654556v1	2113	2094	19	894	347	3354	This study
Crotalus_tigris	GCA_016545835.1_ASM1654583v1	3242	3192	50	34	78	3354	This study
Phylloscopus_trochilus_trochilus	GCA_016584745.1_LUNI_Phtr_3	2940	2860	80	206	208	3354	This study
Arothron_firmamentum	GCA_016586285.1_aroFir_1.0	3158	3144	14	104	92	3354	This study
Platyplectrum_ornatum	GCA_016617825.1_ASM1661782v1	1497	1472	25	962	895	3354	This study
Callionymus_lyra	GCA_016630915.1_ASM1663091v1	3175	3152	23	74	105	3354	This study
Pavo_muticus	GCA_016647715.1_ASM1664771v1	3146	3123	23	90	118	3354	This study
Antechinus_stuartii	GCA_016696395.1_USYD_AStu_M	3247	3156	91	59	48	3354	This study
Saimiri_boliviensis_boliviensis	GCA_016699345.2_BCM_Sbol_2.1	3271	3111	160	40	43	3354	This study
Pimephales_promelas	GCA_016745375.1_EPA_FHM_2.0	3247	3181	66	46	61	3354	This study
Psettodes_erumei	GCA_016785225.1_ASM1678522v1	3286	3274	12	24	44	3354	This study
Pseudorhombus_dupliciocellatus	GCA_016785235.1_ASM1678523v1	3270	3249	21	35	49	3354	This study
Paraplagusia_blochii	GCA_016785265.1_ASM1678526v1	3163	3137	26	101	90	3354	This study
Brachirus_orientalis	GCA_016785285.1_ASM1678528v1	3274	3252	22	37	43	3354	This study
Colistium_nudipinnis	GCA_016785305.1_ASM1678530v1	3281	3256	25	30	43	3354	This study
Chascanopsetta_lugubris	GCA_016785325.1_ASM1678532v1	2748	2724	24	419	187	3354	This study
Trinectes_maculatus	GCA_016785345.1_ASM1678534v1	3274	3253	21	35	45	3354	This study
Esox_niger	GCA_016801105.1_ASM1680110v1	2668	2633	35	473	213	3354	This study
Novumbra_hubbsi	GCA_016801125.1_ASM1680112v1	2604	2572	32	513	237	3354	This study
Umbra_pygmaea	GCA_016801145.1_ASM1680114v1	2072	2024	48	855	427	3354	This study
Esox_masquinongy	GCA_016801175.1_ASM1680117v1	2645	2606	39	488	221	3354	This study
Dallia_pectoralis	GCA_016801195.1_ASM1680119v1	2173	2149	24	763	418	3354	This study
Hystrix_brachyura	GCA_016801275.1_DSBC_Hbra_1.0	3253	3191	62	51	50	3354	This study
Manis_crassicaudata	GCA_016801295.1_DSBC_Mcra_1.0	1738	1701	37	1058	558	3354	This study
Caracal_caracal	GCA_016801355.1_CarCar1.0	3194	3162	32	107	53	3354	This study
Ophiodon_elongatus	GCA_016806645.1_NWFSC_Oelon_r3.mflye	3240	3232	8	51	63	3354	This study
Pogoniulus_pusillus_pusillus	GCA_016859755.1_ASM1685975v1	1441	1423	18	1084	829	3354	This study
Oryzias_woworae	GCA_016861445.1_OryWow_0.9	3282	3229	53	28	44	3354	This study
Atractosteus_spatula	GCA_016984175.1_BGI_Aspa_1.0	3171	3147	24	115	68	3354	This study
Paedocypris_sp_Pulau_Singkep	GCA_017309775.1_IMCB_Psing_F_1.0	3060	3024	36	120	174	3354	This study
Accipiter_gentilis_atricapillus	GCA_017309825.1_UBC_NOGO_v1	3080	3036	44	173	101	3354	This study
Butorides_virescens	GCA_017310255.1_ASM1731025v1	3066	3038	28	161	127	3354	This study
Proteles_cristata_cristata	GCA_017311185.1_Proteles_cristatus_TS307_19_07_2019	3161	3109	52	93	100	3354	This study
Ursus_maritimus	GCA_017311325.1_ASM1731132v1	3260	3220	40	53	41	3354	This study
Platanista_gangetica	GCA_017311385.1_HRRL_Platanista_gangetica_1.0	858	804	54	1317	1179	3354	This study
Otocyon_megalotis_megalotis	GCA_017311455.1_Otocyon_megalotis_TS305_17_09_2019	3166	3062	104	126	62	3354	This study
Bubo_scandiacus	GCA_017315185.1_ASM1731518v1	3171	3140	31	90	93	3354	This study
Phylloscopus_whistleri	GCA_017589585.1_ASM1758958v1	3198	3115	83	48	108	3354	This study
Onychostruthus_taczanowskii	GCA_017590055.1_ASM1759005v1	3186	3162	24	73	95	3354	This study
Montifringilla_adamsi	GCA_017590115.1_ASM1759011v1	3171	3147	24	91	92	3354	This study
Pyrgilauda_ruficollis	GCA_017590135.1_ASM1759013v1	3159	3131	28	96	99	3354	This study
Ochotona_curzoniae	GCA_017591425.1_NIBS_Ocur_1.0	3265	3159	106	38	51	3354	This study
Zosterops_japonicus	GCA_017612475.1_CCG_JAWE_1.0	2907	2875	32	203	244	3354	This study
Corvus_kubaryi	GCA_017639235.1_C.kubaryi_AGA036_p1.0	3084	3041	43	82	188	3354	This study
Mesocricetus_auratus	GCA_017639785.1_BCM_Maur_2.0	3283	3207	76	33	38	3354	This study
Myanophis_thanlyinensis	GCA_017656035.1_ASM1765603v1	1327	1306	21	1240	787	3354	This study
Limnothrissa_miodon	GCA_017657215.1_ASM1765721v1	2677	2567	110	190	487	3354	This study
Sinocyclocheilus_maitianheensis	GCA_018148995.1_ASM1814899v1	3289	1212	2077	34	31	3354	This study
Sinocyclocheilus_anophthalmus	GCA_018155175.1_ASM1815517v1	3204	1395	1809	77	73	3354	This study
Microtus_oregoni	GCA_018167655.1_Mior012	3285	2989	296	32	37	3354	This study
Giraffa_camelopardalis_antiquorum	GCA_018282235.1_ASM1828223v1	3260	3169	91	47	47	3354	This study
Bothrops_jararaca	GCA_018340635.1_Ibu_BjarHA_1.0	2762	2552	210	316	276	3354	This study
Hypomesus_nipponensis	GCA_018346875.1_ASM1834687v1	1782	1694	88	600	972	3354	This study
Haplochromis_burtoni	GCA_018398535.1_NCSU_Asbu1	3252	3227	25	57	45	3354	This study
Cyprinodon_brontotheroides	GCA_018398635.1_UCB_Cbro_1.0	2915	2868	47	289	150	3354	This study
Hirundichthys_speculiger	GCA_018398805.1_Hirundichthys_speculiger_1.0	3265	3100	165	39	50	3354	This study
Tremarctos_ornatus	GCA_018398825.1_TreOrn1.0	3069	3044	25	157	128	3354	This study
Glandirana_rugosa	GCA_018402905.1_Glandirana_rugosa_assembly_1.0	2799	2728	71	366	189	3354	This study
Gorsachius_goisagi	GCA_018403395.1_G_goisagi_scaffold_01	2817	2794	23	402	135	3354	This study
Prionailurus_iriomotensis	GCA_018403415.1_P_iriomotensis_scaffold_01	2602	2566	36	578	174	3354	This study
Haplochromis_chilotes	GCA_018403475.1_Hchi_1.0	3270	3258	12	49	35	3354	This study
Haplochromis_sauvagei	GCA_018403495.1_Hsau_1.0	3261	3248	13	56	37	3354	This study
Lithochromis_rufus	GCA_018403515.1_Lruf_1.0	3264	3249	15	49	41	3354	This study
Crotalus_adamanteus	GCA_018446365.1_Cadam_11369	3100	3057	43	138	116	3354	This study
Tyto_alba	GCA_018691265.1_T.alba_DEE_v4.0	3215	3180	35	38	101	3354	This study
Chelydra_serpentina	GCA_018859375.1_ASM1885937v1	3167	3065	102	91	96	3354	This study
Amblyornis_subalaris	GCA_018881555.1_ASM1888155v1	3181	3151	30	67	106	3354	This study
Motacilla_tschutschensis	GCA_018904545.1_ASM1890454v1	3017	2991	26	143	194	3354	This study
Lethenteron_camtschaticum	GCA_018977245.1_IMCB_Ljap_1.0	1682	1559	123	464	1208	3354	This study
Callorhinchus_milii	GCA_018977255.1_IMCB_Cmil_1.0	3053	2981	72	100	201	3354	This study
Larimichthys_polyactis	GCA_018985215.1_ZAAS_Lpoly_1.0	3183	2957	226	39	132	3354	This study
Rhinoceros_unicornis	GCA_019022865.1_ASM1902286v1	3264	3227	37	54	36	3354	This study
Dipodomys_spectabilis	GCA_019054845.1_ASM1905484v1	3262	3161	101	38	54	3354	This study
Caranx_melampygus	GCA_019059645.1_BYU_Cmel_1.0	3268	2997	271	36	50	3354	This study
Morone_chrysops	GCA_019097615.1_DOM_MoChry_2.0	3264	3254	10	51	39	3354	This study
Mustela_nivalis	GCA_019141155.1_MusNiv_Pri1.0	3252	3175	77	51	51	3354	This study
Cephalopholis_sonnerati	GCA_019142605.1_JJU_Cson_1.0	3286	3231	55	23	45	3354	This study
Phyllostomus_hastatus	GCA_019186645.2_TTU_PhHast_1.1	3279	3243	36	36	39	3354	This study
Microtus_richardsoni	GCA_019206885.1_ASM1920688v1	1905	1821	84	1002	447	3354	This study
Cirrhinus_cirrhosus	GCA_019207145.1_ASM1920714v1	2032	2001	31	956	366	3354	This study
Cygnus_buccinator	GCA_019232035.1_ASM1923203v1	3053	3027	26	76	225	3354	This study
Centrocercus_urophasianus	GCA_019232065.1_USGS_Curo_1.0	3165	3141	24	52	137	3354	This study
Lagopus_leucura	GCA_019238085.1_USGS_WTPT01	3183	3155	28	59	112	3354	This study
Alectoris_rufa	GCA_019345075.1_ASM1934507v1	2999	2986	13	189	166	3354	This study
Panthera_tigris_jacksoni	GCA_019348595.1_Maltig1.0	3234	3201	33	63	57	3354	This study
Galemys_pyrenaicus	GCA_019455555.1_Gpyr_1.0	3264	3218	46	45	45	3354	This study
Chrysopelea_ornata	GCA_019457695.1_c.ornata.1	429	415	14	1128	1797	3354	This study
Addax_nasomaculatus	GCA_019593525.1_ASM1959352v1	3149	3075	74	129	76	3354	This study
Crossoptilon_mantchuricum	GCA_019593555.1_cma1	3203	3186	17	69	82	3354	This study
Periophthalmus_modestus	GCA_019594935.1_ASM1959493v1	3172	3087	85	69	113	3354	This study
Pipa_parva	GCA_019650415.1_UCB_Ppar_1.0	950	924	26	1411	993	3354	This study
Pituophis_catenifer_pumilus	GCA_019677565.1_AU_Pcat_1.0	2268	2236	32	620	466	3354	This study
Labeo_calbasu	GCA_019740295.1_ASM1974029v1	2212	2178	34	819	323	3354	This study
Stomatorhinus_ivindoensis	GCA_019775895.1_ASM1977589v1	858	826	32	1424	1072	3354	This study
Pollimyrus_plagiostoma	GCA_019775915.1_ASM1977591v1	882	839	43	1424	1048	3354	This study
Pollimyrus_isidori	GCA_019775955.1_ASM1977595v1	812	774	38	1433	1109	3354	This study
Synchiropus_splendidus	GCA_019776025.1_fSynSpl_1.0	3190	3164	26	82	82	3354	This study
Albula_glossodonta	GCA_019788955.1_BYU_Aglo_1.0	3269	2899	370	44	41	3354	This study
Corydoras_maculifer	GCA_019802435.1_ASM1980243v1	2952	2920	32	156	246	3354	This study
Corydoras_sp_C115	GCA_019802505.1_Lin1PacBio.ctg.fa.r3p3_pilon_3_oneline.fasta	3160	3126	34	62	132	3354	This study
Praomys_delectorum	GCA_019843815.1_ASM1984381v1	1947	1819	128	974	433	3354	This study
Grammomys_dolichurus	GCA_019843835.1_ASM1984383v1	917	850	67	1340	1097	3354	This study
Hylomyscus_alleni	GCA_019843855.1_ASM1984385v1	839	793	46	1306	1209	3354	This study
Rhynchomys_soricoides	GCA_019843965.1_ASM1984396v1	3125	3064	61	54	175	3354	This study
Rhabdomys_dilectus	GCA_019844195.1_ASM1984419v1	3046	2981	65	111	197	3354	This study
Rangifer_tarandus_caribou	GCA_019903745.1_ULRtarCaribou_2	3229	3061	168	76	49	3354	This study
Nanger_dama_ruficollis	GCA_019969365.1_SCBI_Ndam_1.0	3258	3063	195	60	36	3354	This study
Plecoglossus_altivelis	GCA_019972215.1_Pal_1.0	3197	3158	39	85	72	3354	This study
Euthynnus_affinis	GCA_019973915.1_EUTAFF_01	3226	3199	27	74	54	3354	This study
Lanius_collurio	GCA_020086605.1_ASM2008660v1	2984	2844	140	188	182	3354	This study
Acipenser_transmontanus	GCA_020113195.1_MU_Atrans_1.0	475	398	77	1036	1843	3354	This study
Muntiacus_gongshanensis	GCA_020226025.1_ASM2022602v1	3176	3067	109	58	120	3354	This study
Eira_barbara	GCA_020311275.1_ASM2031127v1	3280	3221	59	34	40	3354	This study
Brachyhypopomus_occidentalis	GCA_020368025.1_ASM2036802v1	3239	3223	16	31	84	3354	This study
Microtus_richardsoni_arvicoloides	GCA_020387435.1_ASM2038743v1	3086	2937	149	190	78	3354	This study
Microtus_montanus	GCA_020392405.1_ASM2039240v1	2453	2403	50	561	340	3354	This study
Ammodramus_savannarum_pratensis	GCA_020466415.1_ASM2046641v1	2801	2777	24	185	368	3354	This study
Glaucomys_volans	GCA_020662805.1_ASM2066280v1	3164	3058	106	122	68	3354	This study
Calotes_versicolor	GCA_020711275.1_ASM2071127v1	224	208	16	867	2263	3354	This study
Sciurus_niger	GCA_020740815.1_VCOM_Snig_1.0	2970	2797	173	254	130	3354	This study
Riparia_riparia	GCA_020917445.1_IEE_cmpg_Riparia_riparia_6505	2610	2588	22	389	355	3354	This study
Ursus_americanus	GCA_020975775.1_gsc_jax_bbear_1.0	3271	3246	25	43	40	3354	This study
Elaphurus_davidianus	GCA_021018665.1_miluL	3064	2948	116	190	100	3354	This study
Scomber_colias	GCA_021039105.1_S.colias_p1.0	3229	3198	31	49	76	3354	This study
Willisornis_vidua_nigrigula	GCA_021164005.1_ASM2116400v1	3035	3012	23	149	170	3354	This study
Macaca_arctoides	GCA_021188215.1_Marc_1.0	3189	3091	98	111	54	3354	This study
Marmota_monax	GCA_021218885.1_Marmota_monax_Labrador192_V1.0	3284	3135	149	37	33	3354	This study
Pteronotus_parnellii_mesoamericanus	GCA_021234165.1_CSHL_Meso_final	3299	3234	65	22	33	3354	This study
Mirounga_angustirostris	GCA_021288785.2_ASM2128878v2	3217	3127	90	92	45	3354	This study
Lophura_nycthemera	GCA_021292215.1_ASM2129221v1	3192	3176	16	64	98	3354	This study
Tor_tambroides	GCA_021397915.2_ASM2139791v2	2970	1723	1247	231	153	3354	This study
Gyps_himalayensis	GCA_021398385.1_ASM2139838v1	3169	3149	20	57	128	3354	This study
Caranx_ignobilis	GCA_021432705.1_BYU_Cign_1.0	3305	3270	35	19	30	3354	This study
Catharus_minimus	GCA_021437185.1_HU_Cminimus_1.0	2979	2959	20	190	185	3354	This study
Catharus_bicknelli	GCA_021437205.1_HU_Cbicknelli_1.0	2910	2887	23	241	203	3354	This study
Cryptotis_parvus	GCA_021461705.1_Cryptotis_parva_assembly_1.0	1780	1743	37	576	998	3354	This study
Ovibos_moschatus	GCA_021462335.1_ASM2146233v1	3245	3142	103	62	47	3354	This study
Hipposideros_pendleburyi	GCA_021464545.1_ASM2146454v1	3249	3154	95	54	51	3354	This study
Rutilus_rutilus	GCA_021464565.1_fRutRut3.pri.20211004	3306	3258	48	11	37	3354	This study
Pavo_cristatus	GCA_021513735.1_PavCris_1.0	3179	3159	20	47	128	3354	This study
Acrocephalus_arundinaceus	GCA_021534815.1_ASM2153481v1	3190	3112	78	57	107	3354	This study
Thunnus_orientalis	GCA_021601225.1_Tori_3.0	3300	3215	85	23	31	3354	This study
Mastomys_natalensis	GCA_021653895.1_UFL_Mnatal_1.0	3148	3018	130	125	81	3354	This study
Lonchura_striata	GCA_021869885.1_ASM2186988v1	2944	2918	26	211	199	3354	This study
Pipa_carvalhoi	GCA_021901965.1_W530	401	387	14	1000	1953	3354	This study
Artemisiospiza_belli	GCA_021963965.1_bArtBel1.0.p	3199	3170	29	55	100	3354	This study
Lynx_rufus	GCA_022079265.1_mLynRuf1.p	3274	3231	43	54	26	3354	This study
Actinemys_marmorata	GCA_022086475.1_rActMar1.p	3245	3214	31	29	80	3354	This study
Progne_subis_subis	GCA_022316685.1_UM_PSub_1	2968	2886	82	86	300	3354	This study
Moschus_berezovskii	GCA_022376915.1_ASM2237691v1	3234	3063	171	61	59	3354	This study
Tragulus_kanchil	GCA_022376925.1_ASM2237692v1	3222	3054	168	43	89	3354	This study
Anilios_bituberculatus	GCA_022379055.1_ASM2237905v1	561	548	13	1310	1483	3354	This study
Tretioscincus_oriximinensis	GCA_022410635.1_HLtreOri1	3209	3178	31	80	65	3354	This study
Calyptommatus_sinebrachiatus	GCA_022412395.1_HLcalSin1	3085	3051	34	159	110	3354	This study
Noturus_placidus	GCA_022414735.1_MU_Nplac_3.0	2938	2895	43	272	144	3354	This study
Acrocephalus_familiaris_kingi	GCA_022441285.1_AcrFamKingi1.0	3035	3006	29	135	184	3354	This study
Rangifer_tarandus	GCA_022457185.1_ASM2245718v1	3153	2980	173	137	64	3354	This study
Myiozetetes_cayanensis	GCA_022539395.1_myiCay2020	3226	3203	23	54	74	3354	This study
Embiotoca_jacksoni	GCA_022577435.1_fEmbJac1.0.p	3293	3281	12	23	38	3354	This study
Passerculus_sandwichensis_alaudinus	GCA_022577445.1_bPasSan1.0.p	3210	3185	25	59	85	3354	This study
Arizona_elegans	GCA_022577455.1_rAriEle1.0.p	3249	3210	39	30	75	3354	This study
Laterallus_jamaicensis_coturniculus	GCA_022605575.1_bLatJam1.0.p	3193	3172	21	39	122	3354	This study
Rallus_limicola	GCA_022605955.1_bRalLim1.0.p	3207	3188	19	35	112	3354	This study
Phrynoglossus_myanhessei	GCA_022657655.1_ASM2265765v1	253	236	17	925	2176	3354	This study
Semicossyphus_pulcher	GCA_022749685.1_fSemPul1.0.p	3316	3304	12	12	26	3354	This study
Melospiza_melodia	GCA_022749695.1_bMelMel1.0.p	3184	3153	31	59	111	3354	This study
Emberiza_elegans	GCA_022818055.1_ASM2281805v1	3206	3174	32	55	93	3354	This study
Neoarius_graeffei	GCA_022956915.1_ASM2295691v1	563	549	14	1329	1462	3354	This study
Elgaria_multicarinata_webbii	GCA_023053635.1_rElgMul1.0.p	3268	3241	27	27	59	3354	This study
Diadophis_punctatus_similis	GCA_023053685.1_rDiaPun1.0.p	3205	3157	48	46	103	3354	This study
Clinocottus_analis	GCA_023055335.1_fCliAna1.0.p	3286	3266	20	16	52	3354	This study
Agelaius_tricolor	GCA_023055355.1_bAgeTri1.0.p	3222	3196	26	54	78	3354	This study
Callipepla_californica_brunnescens	GCA_023055505.1_bCalCai1.0.p	3201	3182	19	37	116	3354	This study
Clarias_fuscus	GCA_023065575.1_ASM2306557v1	1332	1308	24	1221	801	3354	This study
Ursus_arctos	GCA_023065955.1_UrsArc1.0	3268	3234	34	45	41	3354	This study
Corvus_cornix	GCA_023065965.1_Corvus_cornix_S_Up_H60_v1.0_flye.10kbFILTER	2853	2824	29	221	280	3354	This study
Atherinomorus_stipes	GCA_023101725.1_atherinomorus_stipes_v1	3240	3158	82	65	49	3354	This study
Typhlomys_cinereus	GCA_023101885.1_KIZ_TCIN_v1.0	3267	3015	252	46	41	3354	This study
Spilogale_interrupta	GCA_023159085.1_UWYO_SpInte_0.1	3289	3246	43	26	39	3354	This study
Speothos_venaticus	GCA_023170115.1_Speothos_venaticus_v01	2716	2623	93	504	134	3354	This study
Aspidoscelis_tigris_stejnegeri	GCA_023333525.1_rAspTig1.0.p	2724	2698	26	45	585	3354	This study
Puffinus_mauretanicus	GCA_023333565.1_ASM2333356v1	3192	3173	19	78	84	3354	This study
Sceloporus_occidentalis	GCA_023333645.1_rSceOcc1.0.p	3320	850	2470	19	15	3354	This study
Balaenoptera_physalus	GCA_023338255.1_SBiKF_Bphy_ph2	3209	3071	138	92	53	3354	This study
Cebidichthys_violaceus	GCA_023349555.1_fCebVio1.0.p	3099	3084	15	51	204	3354	This study
Charina_bottae	GCA_023362775.1_rChaBot1.0.p	3272	3227	45	30	52	3354	This study
Nycticorax_nycticorax	GCA_023375905.1_ASM2337590v1	2903	2885	18	194	257	3354	This study
Bettongia_penicillata_ogilbyi	GCA_023548195.1_mBetpen1.pri.20210916	3276	3154	122	45	33	3354	This study
Myrmecobius_fasciatus	GCA_023553655.1_mMyrfas1.20211206	2884	2732	152	317	153	3354	This study
Piaractus_mesopotamicus	GCA_023558415.1_UNR_Pmes_1.0	1898	1870	28	949	507	3354	This study
Actinemys_pallida	GCA_023634205.1_rActPal1.0.p	3292	3261	31	30	32	3354	This study
Phaethornis_superciliosus	GCA_023637945.1_DD_ASM_B1	3173	3156	17	47	134	3354	This study
Empidonax_alnorum	GCA_023644505.1_EAln_1.0	3148	3114	34	88	118	3354	This study
Varanus_salvator_macromaculatus	GCA_023646645.1_ASM2364664v1	3202	3099	103	57	95	3354	This study
Odocoileus_virginianus	GCA_023699985.1_Ovbor_1.0	3229	3069	160	47	78	3354	This study
Hoolock_leuconedys	GCA_023748175.1_ASM2374817v1	3160	3043	117	101	93	3354	This study
Symphalangus_syndactylus	GCA_023761135.1_ASM2376113v1	3207	3067	140	85	62	3354	This study
Trachypithecus_phayrei_crepuscula	GCA_023762245.1_ASM2376224v1	3136	3019	117	113	105	3354	This study
Pygathrix_nigripes	GCA_023764695.1_ASM2376469v1	3161	3022	139	107	86	3354	This study
Rhinopithecus_strykeri	GCA_023764705.1_ASM2376470v1	3174	3031	143	92	88	3354	This study
Pongo_pygmaeus	GCA_023767775.1_ASM2376777v1	3206	3104	102	74	74	3354	This study
Pithecia_pithecia	GCA_023779675.1_ASM2377967v1	3230	3058	172	53	71	3354	This study
Papio_hamadryas	GCA_023781915.1_ASM2378191v1	3236	3116	120	67	51	3354	This study
Nomascus_siki	GCA_023783065.1_ASM2378306v1	3197	3080	117	80	77	3354	This study
Mandrillus_sphinx	GCA_023783085.1_ASM2378308v1	3202	3105	97	70	82	3354	This study
Macaca_assamensis	GCA_023783095.1_ASM2378309v1	3223	3120	103	70	61	3354	This study
Loris_tardigradus	GCA_023783135.1_ASM2378313v1	3283	3049	234	38	33	3354	This study
Lophocebus_aterrimus	GCA_023783235.1_ASM2378323v1	3232	3113	119	83	39	3354	This study
Galago_moholi	GCA_023783435.1_ASM2378343v1	3142	2961	181	149	63	3354	This study
Erythrocebus_patas	GCA_023783455.1_ASM2378345v1	3226	3103	123	58	70	3354	This study
Daubentonia_madagascariensis	GCA_023783475.1_ASM2378347v1	3278	3220	58	36	40	3354	This study
Chlorocebus_aethiops	GCA_023783515.1_ASM2378351v1	3216	3103	113	66	72	3354	This study
Cercopithecus_albogularis	GCA_023783535.1_ASM2378353v1	3219	3093	126	73	62	3354	This study
Ateles_geoffroyi	GCA_023783555.1_ASM2378355v1	3247	3100	147	54	53	3354	This study
Cebus_albifrons	GCA_023783575.1_ASM2378357v1	3232	3081	151	52	70	3354	This study
Macaca_silenus	GCA_023807365.1_ASM2380736v1	3237	3125	112	67	50	3354	This study
Phrynocephalus_versicolor	GCA_023846285.1_PhrVer	3079	3033	46	128	147	3354	This study
Pseudis_tocantins	GCA_023970735.1_UNICAMP_Ptoc_Z_chromosome_1.0	0	0	0	8	3346	3354	This study
Azemiops_feae	GCA_023970755.1_CU_Afeae_1.0	3201	3158	43	67	86	3354	This study
Gulo_gulo_luscus	GCA_023973185.1_Gulo_gulo_luscus_A-V1.0	2220	2191	29	841	293	3354	This study
Prochilodus_magdalenae	GCA_024036415.1_ASM2403641v1	3203	3149	54	86	65	3354	This study
Gymnocypris_eckloni	GCA_024082105.1_ASM2408210v1	2914	2787	127	57	383	3354	This study
Ginglymostoma_cirratum	GCA_024137785.1_ASM2413778v1	2836	2779	57	221	297	3354	This study
Syngnathus_scovelli	GCA_024217435.2_RoL_Ssco_1.1	3218	3187	31	48	88	3354	This study
Accipiter_cooperii	GCA_024222105.1_ASM2422210v1	2997	2978	19	231	126	3354	This study
Chrysocyon_brachyurus	GCA_024262425.1_ASM2426242v1	1930	1869	61	1068	356	3354	This study
Psittacara_holochlorus	GCA_024320895.1_ASM2432089v1	2188	2172	16	883	283	3354	This study
Eupsittula_cactorum	GCA_024320935.1_ASM2432093v1	2072	2056	16	919	363	3354	This study
Primolius_couloni	GCA_024331605.1_ASM2433160v1	2360	2344	16	731	263	3354	This study
Psittacara_leucophthalmus	GCA_024331625.1_ASM2433162v1	2159	2144	15	888	307	3354	This study
Poicephalus_robustus	GCA_024331645.1_ASM2433164v1	1820	1804	16	1047	487	3354	This study
Amazona_autumnalis	GCA_024331665.1_ASM2433166v1	1493	1475	18	1280	581	3354	This study
Stegophilus_panzeri	GCA_024331685.1_ASM2433168v1	3204	2904	300	86	64	3354	This study
Cyanopsitta_spixii	GCA_024336845.1_ASM2433684v1	2431	2412	19	697	226	3354	This study
Actenoides_hombroni	GCA_024336885.1_ASM2433688v1	3027	3009	18	191	136	3354	This study
Diopsittaca_nobilis	GCA_024337085.1_ASM2433708v1	2381	2364	17	724	249	3354	This study
Eptatretus_burgeri	GCA_024346535.1_Eburgeri_v1	1669	1623	46	497	1188	3354	This study
Neodontobutis_hainanensis	GCA_024349245.1_ASM2434924v1	3194	3091	103	48	112	3354	This study
Pionus_maximiliani	GCA_024361725.1_ASM2436172v1	1480	1467	13	1230	644	3354	This study
Cacatua_alba	GCA_024361745.1_ASM2436174v1	2286	2273	13	795	273	3354	This study
Psittacara_wagleri	GCA_024361765.1_ASM2436176v1	2373	2349	24	741	240	3354	This study
Silurus_asotus	GCA_024362625.1_ASM2436262v1	3212	3191	21	69	73	3354	This study
Setophaga_petechia	GCA_024362935.1_bSetPet1.0.p	3140	3109	31	63	151	3354	This study
Callocephalon_fimbriatum	GCA_024363025.1_ASM2436302v1	1671	1658	13	1136	547	3354	This study
Aratinga_maculata	GCA_024363045.1_ASM2436304v1	2387	2368	19	724	243	3354	This study
Pyrrhura_roseifrons	GCA_024363065.1_ASM2436306v1	2446	2428	18	677	231	3354	This study
Eos_semilarvata	GCA_024363085.1_ASM2436308v1	1919	1909	10	1033	402	3354	This study
Hyperoodon_ampullatus	GCA_024363105.1_DAL_HAmp_1	2778	2662	116	428	148	3354	This study
Leptodoras_oyakawai	GCA_024363135.1_ASM2436313v1	2483	2461	22	585	286	3354	This study
Aquila_nipalensis	GCA_024363155.1_ASM2436315v1	3175	3165	10	117	62	3354	This study
Accipiter_hiogaster	GCA_024363185.1_ASM2436318v1	3137	3121	16	144	73	3354	This study
Perognathus_longimembris	GCA_024363435.1_mPerLon1.0.a	3216	2953	263	35	103	3354	This study
Oostethus_manadensis	GCA_024372805.1_ASM2437280v1	3247	3221	26	43	64	3354	This study
Falco_tinnunculus	GCA_024430995.1_CommonKestrel10X.pri	2834	2815	19	120	400	3354	This study
Falco_peregrinus_peregrinator	GCA_024431005.1_BlackShaheen10X.pri	2980	2959	21	88	286	3354	This study
Falco_peregrinus_peregrinus	GCA_024432065.1_Peregrine10X.alt	3066	3044	22	81	207	3354	This study
Falco_pelegrinoides	GCA_024432695.1_Barbary10X.pri	3010	2996	14	82	262	3354	This study
Pterophyllum_scalare	GCA_024447675.1_IM_Pscalare_1.0	1787	1759	28	386	1181	3354	This study
Daboia_siamensis	GCA_024449315.1_ASM2444931v1	2980	2930	50	234	140	3354	This study
Pyrrhura_hoffmanni	GCA_024496005.1_ASM2449600v1	2385	2366	19	707	262	3354	This study
Darevskia_valentini	GCA_024498535.1_Dval_245	3115	3048	67	155	84	3354	This study
Halcyon_malimbica	GCA_024499975.1_ASM2449997v1	2704	2687	17	468	182	3354	This study
Pyrrhura_lucianii	GCA_024499995.1_ASM2449999v1	2388	2365	23	718	248	3354	This study
Entomyzon_cyanotis	GCA_024500445.1_MCZ_Ecyan_1.0	3241	3200	41	51	62	3354	This study
Vulpes_ferrilata	GCA_024500485.1_ASM2450048v1	3284	3157	127	32	38	3354	This study
Gulo_gulo	GCA_900006375.2_Gulo_2.2_annotated	2992	2960	32	255	107	3354	This study
Pogona_vitticeps	GCA_900067755.1_pvi1.1	3207	3184	23	86	61	3354	This study
Labrus_bergylta	GCA_900080235.1_BallGen_V1	3221	3095	126	57	76	3354	This study
Leuciscus_waleckii	GCA_900092035.1_Amur_ide_genome	2570	2539	31	396	388	3354	This study
Saxicola_maurus_maurus	GCA_900205225.1_Saxicola_maurus.2	3105	3087	18	99	150	3354	This study
Lacerta_bilineata	GCA_900245895.1_L._bilineata_genome_assembly	3162	3098	64	116	76	3354	This study
Lacerta_viridis	GCA_900245905.1_ASM90024590v1	3219	3138	81	80	55	3354	This study
Melanogrammus_aeglefinus	GCA_900291075.1_MAEA_1	3116	3067	49	121	117	3354	This study
Osmerus_eperlanus	GCA_900302275.1_ASM90030227v1	1917	1880	37	857	580	3354	This study
Percopsis_transmontana	GCA_900302285.1_ASM90030228v1	2188	2170	18	758	408	3354	This study
Parasudis_fraserbrunneri	GCA_900302295.1_ASM90030229v1	1405	1382	23	1002	947	3354	This study
Polymixia_japonica	GCA_900302305.1_ASM90030230v1	2248	2227	21	754	352	3354	This study
Phycis_blennoides	GCA_900302315.1_ASM90030231v1	2087	2073	14	730	537	3354	This study
Muraenolepis_marmorata	GCA_900302325.1_ASM90030232v1	1215	1201	14	1125	1014	3354	This study
Phycis_phycis	GCA_900302335.1_ASM90030233v1	1425	1409	16	1011	918	3354	This study
Melanonus_zugmayeri	GCA_900302345.1_ASM90030234v1	1683	1671	12	932	739	3354	This study
Cyttopsis_rosea	GCA_900302355.1_ASM90030235v1	1818	1796	22	998	538	3354	This study
Macrourus_berglax	GCA_900302365.1_ASM90030236v1	1232	1164	68	1042	1080	3354	This study
Bathygadus_melanobranchus	GCA_900302375.1_ASM90030237v1	1852	1834	18	929	573	3354	This study
Lota_lota	GCA_900302385.1_ASM90030238v1	1616	1600	16	988	750	3354	This study
Bregmaceros_cantori	GCA_900302395.1_ASM90030239v1	736	705	31	1190	1428	3354	This study
Typhlichthys_subterraneus	GCA_900302405.1_ASM90030240v1	1879	1852	27	927	548	3354	This study
Trisopterus_minutus	GCA_900302415.1_ASM90030241v1	1174	1160	14	933	1247	3354	This study
Brosme_brosme	GCA_900302425.1_ASM90030242v1	1593	1578	15	1032	729	3354	This study
Boreogadus_saida	GCA_900302515.1_ASM90030251v1	1172	1159	13	1031	1151	3354	This study
Neoniphon_sammara	GCA_900302535.1_ASM90030253v1	2502	2474	28	548	304	3354	This study
Lampris_guttatus	GCA_900302545.1_ASM90030254v1	1260	1238	22	1218	876	3354	This study
Myripristis_jacobus	GCA_900302555.1_ASM90030255v1	2481	2457	24	582	291	3354	This study
Gadus_chalcogrammus	GCA_900302575.1_ASM90030257v1	1329	1315	14	1055	970	3354	This study
Regalecus_glesne	GCA_900302585.1_ASM90030258v1	2019	1998	21	903	432	3354	This study
Gadiculus_argenteus	GCA_900302595.1_ASM90030259v1	1137	1121	16	1027	1190	3354	This study
Rondeletia_loricata	GCA_900302605.1_ASM90030260v1	1622	1600	22	1047	685	3354	This study
Holocentrus_rufus	GCA_900302615.1_ASM90030261v1	2604	2568	36	531	219	3354	This study
Chatrabus_melanurus	GCA_900302635.1_ASM90030263v1	895	881	14	1416	1043	3354	This study
Sebastes_norvegicus	GCA_900302655.1_ASM90030265v1	2247	2226	21	764	343	3354	This study
Spondyliosoma_cantharus	GCA_900302685.1_ASM90030268v1	2693	2678	15	479	182	3354	This study
Helostoma_temminkii	GCA_900302695.1_ASM90030269v1	3082	3068	14	186	86	3354	This study
Parablennius_parvicornis	GCA_900302745.1_ASM90030274v1	2112	2099	13	707	535	3354	This study
Chromis_chromis	GCA_900302755.1_ASM90030275v1	2116	2093	23	812	426	3354	This study
Mora_moro	GCA_900303205.1_Mora_mora_assembly	1506	1493	13	991	857	3354	This study
Trachyrincus_scabrus	GCA_900303215.1_ASM90030321v1	1838	1818	20	890	626	3354	This study
Laemonema_laureysi	GCA_900303225.1_ASM90030322v1	1647	1631	16	951	756	3354	This study
Arctogadus_glacialis	GCA_900303235.1_ASM90030323v1	1101	1091	10	1073	1180	3354	This study
Selene_dorsalis	GCA_900303245.1_ASM90030324v1	2695	2673	22	372	287	3354	This study
Lesueurigobius_sanzi	GCA_900303255.1_ASM90030325v1	1946	1931	15	740	668	3354	This study
Brotula_barbata	GCA_900303265.1_ASM90030326v1	3016	2997	19	226	112	3354	This study
Antennarius_striatus	GCA_900303275.1_ASM90030327v1	2160	2138	22	693	501	3354	This study
Rhinella_marina	GCA_900303285.1_RM170330	3022	2942	80	164	168	3354	This study
Merluccius_merluccius	GCA_900312545.1_ASM90031254v1	1204	1191	13	1077	1073	3354	This study
Lamprogrammus_exutus	GCA_900312555.1_ASM90031255v1	1512	1487	25	1141	701	3354	This study
Beryx_splendens	GCA_900312565.1_ASM90031256v1	1477	1459	18	1020	857	3354	This study
Acanthochaenus_luetkenii	GCA_900312575.1_ASM90031257v1	1689	1667	22	1033	632	3354	This study
Malacocephalus_occidentalis	GCA_900312585.1_ASM90031258v1	1373	1357	16	1021	960	3354	This study
Guentherus_altivela	GCA_900312595.1_ASM90031259v1	323	316	7	959	2072	3354	This study
Stylephorus_chordatus	GCA_900312615.1_ASM90031261v1	1055	1042	13	1073	1226	3354	This study
Merluccius_polli	GCA_900312625.1_ASM90031262v1	1122	1111	11	1110	1122	3354	This study
Pollachius_virens	GCA_900312635.1_ASM90031263v1	1291	1276	15	1032	1031	3354	This study
Carapus_acus	GCA_900312935.1_ASM90031293v1	2539	2512	27	495	320	3354	This study
Merluccius_capensis	GCA_900312945.1_ASM90031294v1	1325	1312	13	1099	930	3354	This study
Myoxocephalus_scorpius	GCA_900312955.1_ASM90031295v1	1798	1777	21	855	701	3354	This study
Molva_molva	GCA_900323295.1_ASM90032329v1	1585	1568	17	1051	718	3354	This study
Trachyrincus_murrayi	GCA_900323305.1_ASM90032330v1	2568	2555	13	494	292	3354	This study
Borostomias_antarcticus	GCA_900323325.1_ASM90032332v1	1022	1006	16	935	1397	3354	This study
Zeus_faber	GCA_900323335.1_ASM90032333v1	1623	1599	24	1120	611	3354	This study
Pseudochromis_fuscus	GCA_900323345.1_ASM90032334v1	2598	2579	19	530	226	3354	This study
Merlangius_merlangus	GCA_900323355.1_ASM90032335v1	1277	1262	15	1020	1057	3354	This study
Monocentris_japonicus	GCA_900323365.1_ASM90032336v1	2393	2367	26	668	293	3354	This study
Benthosema_glaciale	GCA_900323375.1_ASM90032337v1	1520	1361	159	840	994	3354	This study
Simochromis_diagramma	GCA_900408965.1_fSimDia1.1	3278	3251	27	31	45	3354	This study
Danionella_dracula	GCA_900490495.1_fDanDra1.1	3063	2998	65	74	217	3354	This study
Arapaima_gigas	GCA_900497675.1_Agigas_genome_assembly_all_mixed_samples	3256	3085	171	46	52	3354	This study
Vombatus_ursinus	GCA_900497805.2_bare-nosed_wombat_genome_assembly	3255	3157	98	48	51	3354	This study
Notechis_scutatus	GCA_900518725.1_TS10Xv2-PRI	3059	3003	56	159	136	3354	This study
Pseudonaja_textilis	GCA_900518735.1_EBS10Xv2-PRI	3174	3128	46	87	93	3354	This study
Epinephelus_coioides	GCA_900536245.1_Grouper	3296	3263	33	27	31	3354	This study
Trachinotus_ovatus	GCA_900607315.1_golden_pompano_genome_assembly_version_2	3280	3250	30	28	46	3354	This study
Hypoplectrus_puella	GCA_900610375.1_HP_genome_unmasked_01	3258	3242	16	50	46	3354	This study
Arctocephalus_gazella	GCA_900642305.1_arcGaz3	3052	2984	68	169	133	3354	This study
Diretmus_argenteus	GCA_900660295.1_Diretmus_argenteus_assembly	545	537	8	917	1892	3354	This study
Cetomimus_sp_NI1144	GCA_900660305.1_Opsanus_beta_assembly	600	586	14	1014	1740	3354	This study
Diretmoides_pauciradiatus	GCA_900660315.1_Diretmoides_pauciradiatus_assembly	1474	1453	21	1111	769	3354	This study
Opsanus_beta	GCA_900660325.1_Opsanus_beta_assembly	579	565	14	1341	1434	3354	This study
Hoplostethus_atlanticus	GCA_900660355.1_Hoplostethus_atlanticus_assembly	2330	2306	24	669	355	3354	This study
Gephyroberyx_darwinii	GCA_900660455.1_Gephyroberyx_darwinii_assembly	2328	2303	25	655	371	3354	This study
Lynx_pardinus	GCA_900661375.1_LYPA1.0	3120	3082	38	128	106	3354	This study
Anoplogaster_cornuta	GCA_900683385.1_Anoplogaster_cornuta_assembly	1073	1054	19	1037	1244	3354	This study
Aeoliscus_strigatus	GCA_901007665.1_Aeoliscus_strigatus_assembly	3122	3100	22	143	89	3354	This study
Fistularia_tabacaria	GCA_901007705.1_Fistularia_tabacaria_assembly	3033	3008	25	213	108	3354	This study
Dactylopterus_volitans	GCA_901007715.1_Dactylopterus_volitans_assembly	2313	2285	28	628	413	3354	This study
Hippocampus_kuda	GCA_901007745.1_Hippocampus_kuda_assembly	2839	2804	35	338	177	3354	This study
Dunckerocampus_dactyliophorus	GCA_901007775.1_Doryramphus_dactylophorus_assembly	2854	2839	15	353	147	3354	This study
Entelurus_aequoreus	GCA_901007785.1_Entelurus_aequoreus_assembly	671	662	9	1240	1443	3354	This study
Hippocampus_whitei	GCA_901007805.1_Hippocampus_whitei_assembly	2890	2860	30	302	162	3354	This study
Macroramphosus_scolopax	GCA_901007825.1_Macroramphorus_scolopax_assembly	2939	2922	17	286	129	3354	This study
Syngnathus_rostellatus	GCA_901007895.1_Syngnathus_rostellatus_assembly	3001	2979	22	185	168	3354	This study
Nerophis_ophidion	GCA_901007905.1_Nerophis_ophidion_assembly	1099	1077	22	1248	1007	3354	This study
Syngnathus_typhle	GCA_901007915.1_Syngnathus_typhle_assembly	3194	3171	23	50	110	3354	This study
Anguilla_obscura	GCA_901111295.1_Anguilla_obscura_assembly	2661	2469	192	460	233	3354	This study
Anguilla_megastoma	GCA_901111305.1_Anguilla_megastoma_assembly	2691	2512	179	432	231	3354	This study
Anguilla_marmorata	GCA_901111315.1_Anguilla_marmorata_assembly	2737	2543	194	395	222	3354	This study
Tyto_alba_alba	GCA_902150015.1_genome_assembly_l500	3048	3030	18	179	127	3354	This study
Aratinga_solstitialis	GCA_902168055.1_ARATINGA-SOLSTITIALIS-ASSEMBLY-PRJEB33153	3222	3198	24	52	80	3354	This study
Peromyscus_nudipes	GCA_902168325.1_Pnud_10x_v1	2143	2045	98	859	352	3354	This study
Peromyscus_aztecus	GCA_902168405.1_Pazt_10x_v1	2147	2014	133	858	349	3354	This study
Peromyscus_melanophrys	GCA_902168415.1_Pmel_10x_v1	1944	1855	89	991	419	3354	This study
Peromyscus_attwateri	GCA_902168425.1_Patt_10x_v1	2293	2166	127	775	286	3354	This study
Mustela_putorius	GCA_902460175.1_polecat_10x_	3197	3146	51	95	62	3354	This study
Pungitius_pungitius	GCA_902500615.3_NSP_V7	3289	3265	24	22	43	3354	This study
Peromyscus_eremicus	GCA_902702925.1_Peer1.7.4	3088	3009	79	159	107	3354	This study
Rangifer_tarandus_tarandus	GCA_902712895.1_Rtarandus_v2.1	3256	3100	156	58	40	3354	This study
Pteropus_giganteus	GCA_902729225.1_Ma_sr-lr_union100	3239	3210	29	64	51	3354	This study
Mus_minutoides	GCA_902729485.2_Mus_minutoides_I2396_v1	3126	3017	109	150	78	3354	This study
Myodes_glareolus	GCA_902806735.1_Bank_vole1_10x	3201	3104	97	49	104	3354	This study
Microtus_agrestis	GCA_902806775.1_Field_vole_promethion_pilon	3279	3116	163	37	38	3354	This study
Alauda_arvensis	GCA_902810485.1_skylark_genome	3140	3112	28	108	106	3354	This study
Petrochromis_trewavasae	GCA_902810495.1_PTv1.0	3283	3250	33	37	34	3354	This study
Tropheus_moorii	GCA_902810505.1_TMv1.0	3266	3215	51	50	38	3354	This study
Syncerus_caffer	GCA_902825105.1_synceruscaffer	3258	3160	98	56	40	3354	This study
Harpagifer_antarcticus	GCA_902827135.1_fHarAnt1.1	3053	3017	36	78	223	3354	This study
Trematomus_bernacchii	GCA_902827165.1_fTreBer1.1	3219	3186	33	46	89	3354	This study
Gymnodraco_acuticeps	GCA_902827175.1_fGymAcu1.1	3043	3015	28	87	224	3354	This study
Phalloptychus_januarius	GCA_902982915.1_HVK001	3284	3271	13	24	46	3354	This study
Mallotus_villosus	GCA_903064625.1_Mallotus_villosus_assembly	3116	3025	91	115	123	3354	This study
Brachyrhaphis_roseni	GCA_903066815.1_HVK_BR_001	2838	2820	18	369	147	3354	This study
Alfaro_cultratus	GCA_903066825.1_HVK_AC_001	2956	2938	18	312	86	3354	This study
Poeciliopsis_prolifica	GCA_903067045.1_HVK_PP_001	2901	2885	16	312	141	3354	This study
Poeciliopsis_paucimaculata	GCA_903067055.1_HVK_PPA_001	3039	3024	15	218	97	3354	This study
Brachyrhaphis_terrabensis	GCA_903067065.1_HVK_BT_001	1921	1897	24	928	505	3354	This study
Micropoecilia_bifurca	GCA_903067075.1_HVK_MB_001	2465	2444	21	640	249	3354	This study
Poeciliopsis_gracilis	GCA_903067085.1_HVK_PG_001	2846	2830	16	354	154	3354	This study
Girardinus_metallicus	GCA_903067095.1_HVK_GM_001	2787	2777	10	423	144	3354	This study
Poeciliopsis_infans	GCA_903067105.1_HVK_PI_001	3017	3011	6	240	97	3354	This study
Poeciliopsis_presidionis	GCA_903068095.1_HVK_PPR_001	2873	2856	17	346	135	3354	This study
Poecilia_wingei	GCA_903068105.1_HVK_PW_001	2453	2443	10	650	251	3354	This study
Poecilia_gillii	GCA_903068115.1_HVK_PGI_001	2723	2710	13	460	171	3354	This study
Diplodus_sargus	GCA_903131615.1_diplodus_sargus_genome	3234	3217	17	70	50	3354	This study
Mullus_surmuletus	GCA_903171835.1_mullus_surmuletus_genome	2967	2939	28	202	185	3354	This study
Ovis_nivicola_lydekkeri	GCA_903231385.1_OvNiv1.0	3211	3088	123	80	63	3354	This study
Serranus_cabrilla	GCA_903364295.1_serranus_cabrilla_genome	3169	3153	16	107	78	3354	This study
Danio_albolineatus	GCA_903798035.1_fDanAlb1.1	2660	2619	41	440	254	3354	This study
Danio_jaintianensis	GCA_903798115.1_fDanJai1.1	2902	2873	29	259	193	3354	This study
Danio_choprai	GCA_903798125.1_fDanCho1.1	2476	2441	35	504	374	3354	This study
Danio_tinwini	GCA_903798205.1_fDanTin1.1	2737	2708	29	379	238	3354	This study
Colossoma_macropomum	GCA_904425465.1_Colossoma_macropomum	3310	3287	23	17	27	3354	This study
Fratercula_arctica	GCA_905066775.2_FratArc_v2	2940	2921	19	224	190	3354	This study
Nyctereutes_procyonoides	GCA_905146905.1_NYPRO_anot_genome	3278	3154	124	33	43	3354	This study
Cyprinus_carpio_carpio	GCA_905221575.1_Cypcar_WagV4.0	3306	1140	2166	18	30	3354	This study
Dicentrarchus_labrax	GCA_905237075.1_dlabrax2021	3313	3298	15	14	27	3354	This study
Bubalus_bubalis_bubalis	GCA_905249985.1_Buffalo_MAGs	315	60	255	42	2997	3354	This study
Micropoecilia_picta	GCA_905332405.1_picta_flye_male	3161	3137	24	71	122	3354	This study
Bombina_variegata_variegata	GCA_905336975.1_Bvv_clc_v1	398	381	17	1094	1862	3354	This study
Dugong_dugon	GCA_905400935.1_Dugong	3085	3011	74	176	93	3354	This study
Coregonus_lavaretus	GCA_905477555.1_ML_MAG_01	10	10	0	5	3339	3354	This study
Lophiomys_imhausi	GCA_907164525.1_mLopImh1.curated_primary_1811	3181	3104	77	101	72	3354	This study
Psammomys_obesus	GCA_907164565.1_mPsaObe1.curated_primary_1811	3220	3154	66	75	59	3354	This study
Menidia_menidia	GCA_907169785.1_Menidia_menidia_GA_1.0	2891	2811	80	221	242	3354	This study
Lagocephalus_sceleratus	GCA_911728415.1_Lsceleratus_genome.fasta	3238	3224	14	42	74	3354	This study
Ateles_hybridus	GCA_916098195.1_ORGONE_01	3112	2992	120	126	116	3354	This study
Helicolenus_avius	GCA_916700675.1_H-avius_MM3	424	416	8	477	2453	3354	This study
Adelosebastes_latens	GCA_916700685.1_A_latens_148487	2849	2828	21	372	133	3354	This study
Sebastes_helvomaculatus	GCA_916700695.1_S-helvomaculatus_KUI479	2966	2941	25	277	111	3354	This study
Sebastes_exsul	GCA_916700705.1_S-exsul_SEB-BAJA-1	3025	3002	23	238	91	3354	This study
Sebastes_dallii	GCA_916700725.1_S-dalli_xSEB-31	3100	3074	26	177	77	3354	This study
Sebastes_goodei	GCA_916700735.1_S-goodei_SEB-148	2781	2750	31	419	154	3354	This study
Sebastes_cheni	GCA_916700745.1_S_cheni_135386	3063	3045	18	216	75	3354	This study
Sebastes_crameri	GCA_916700755.1_S-crameri_SEB-4	3023	2997	26	238	93	3354	This study
Sebastes_fasciatus	GCA_916700765.1_S-fasciatus_KUI2796	2977	2952	25	256	121	3354	This study
Sebastes_entomelas	GCA_916700775.1_S-entomelas_SEB-8	3108	3081	27	175	71	3354	This study
Sebastes_flavidus	GCA_916700785.1_S-flavidus_SEB-19	3046	3023	23	225	83	3354	This study
Sebastes_glaucus	GCA_916700795.1_S_glaucus_134638	2787	2765	22	411	156	3354	This study
Sebastes_ciliatus	GCA_916700805.1_S-ciliatus_KUI2032	2920	2889	31	313	121	3354	This study
Helicolenus_hilgendorfi	GCA_916700815.1_H-hilgendorfii_KUI10868	833	812	21	707	1814	3354	This study
Sebastes_alutus	GCA_916700825.1_S-alutus_KUI2069	2829	2804	25	380	145	3354	This study
Sebastes_baramenuke	GCA_916700835.1_S_baramenuke_131606	2955	2921	34	288	111	3354	This study
Sebastes_caurinus	GCA_916700845.1_S-caurinus_SEB-191	2839	2815	24	377	138	3354	This study
Sebastes_carnatus	GCA_916700855.1_S-carnatus_xSEB-21	2918	2902	16	317	119	3354	This study
Sebastes_babcocki	GCA_916700865.1_S-babcocki_HO-4	2941	2919	22	302	111	3354	This study
Sebastes_aleutianus	GCA_916700875.1_S-aleutianus_SEB-111	3280	3190	90	20	54	3354	This study
Sebastes_diploproa	GCA_916700885.1_S-diploproa_KUI2154	2965	2941	24	279	110	3354	This study
Sebastes_constellatus	GCA_916700895.1_S-constellatus_SEB-71	3107	3089	18	169	78	3354	This study
Sebastes_aurora	GCA_916700905.1_S-aurora_KUI448	2976	2951	25	288	90	3354	This study
Sebastes_chlorostictus	GCA_916700915.1_S-chlorostictus_xSEB-10	3096	3075	21	182	76	3354	This study
Sebastes_elongatus	GCA_916700925.1_S-elongatus_SEB-146	2839	2815	24	387	128	3354	This study
Hozukius_emblemarius	GCA_916700935.1_H_emblemarius_134878	2780	2763	17	428	146	3354	This study
Sebastes_diaconus	GCA_916700945.1_S-diaconus_SEB-21	3131	3107	24	152	71	3354	This study
Sebastes_atrovirens	GCA_916700955.1_S-atrovirens_xSEB-24	3027	3006	21	232	95	3354	This study
Sebastes_ensifer	GCA_916700965.1_S-ensifer_SEB-163	2987	2964	23	263	104	3354	This study
Sebastes_auriculatus	GCA_916700975.1_S-auriculatus_S-1A	2956	2928	28	297	101	3354	This study
Sebastes_borealis	GCA_916700985.1_S-borealis_KUI2095	748	737	11	640	1966	3354	This study
Hozukius_guyotensis	GCA_916700995.1_H_guyotensis_138486	2790	2769	21	419	145	3354	This study
Sebastes_iracundus	GCA_916701015.1_S_iracundus_136139	2889	2855	34	337	128	3354	This study
Sebastes_koreanus	GCA_916701025.1_S_koreanus_134992	2783	2757	26	436	135	3354	This study
Sebastes_matsubarae	GCA_916701035.1_S_matsubarae_146680	2908	2878	30	338	108	3354	This study
Sebastes_paucispinis	GCA_916701045.1_S-paucispinis_SEB-180	2933	2911	22	310	111	3354	This study
Sebastes_nebulosus	GCA_916701055.1_S_nebulosus_SEB-720	2903	2881	22	339	112	3354	This study
Sebastes_pachycephalus	GCA_916701075.1_S_pachycephalus_137687	3029	3012	17	230	95	3354	This study
Sebastes_inermis	GCA_916701085.1_S_inermis_136187	3063	3048	15	214	77	3354	This study
Sebastes_oblongus	GCA_916701095.1_S_oblongus_137157	2988	2966	22	268	98	3354	This study
Sebastes_joyneri	GCA_916701105.1_S_joyneri_137149	3041	3025	16	224	89	3354	This study
Sebastes_oculatus	GCA_916701125.1_S-oculatus_ER03	3041	3020	21	221	92	3354	This study
Sebastes_kiyomatsui	GCA_916701135.1_S_kiyomatsui_145871	2976	2949	27	273	105	3354	This study
Sebastes_melanostomus	GCA_916701165.1_S-melanostomus_HO-5	3017	2996	21	246	91	3354	This study
Sebastes_levis	GCA_916701195.1_S-levis_KUI567	3005	2984	21	250	99	3354	This study
Sebastes_mentella	GCA_916701205.1_S-mentella_KUI3097	2969	2942	27	284	101	3354	This study
Sebastes_hopkinsi	GCA_916701215.1_S-hopkinsi_xSEB-7	3088	3066	22	198	68	3354	This study
Sebastes_nudus	GCA_916701225.1_S_nudus_133427	3002	2980	22	262	90	3354	This study
Sebastes_mystinus	GCA_916701245.1_S-mystinus_SEB-17	3088	3066	22	187	79	3354	This study
Sebastes_pinniger	GCA_916701255.1_S-pinniger_SEB-75	3129	3111	18	156	69	3354	This study
Sebastes_maliger	GCA_916701265.1_S_maliger_SEB-721	2980	2954	26	279	95	3354	This study
Sebastes_miniatus	GCA_916701275.1_S-miniatus_SEB-74	3299	3245	54	19	36	3354	This study
Sebastes_hubbsi	GCA_916701285.1_S_hubbsi_137692	2965	2935	30	285	104	3354	This study
Sebastes_jordani	GCA_916701295.1_S-jordani_KUI517	2989	2971	18	262	103	3354	This study
Sebastes_minor	GCA_916701305.1_S_minor_135284	2917	2897	20	313	124	3354	This study
Sebastes_moseri	GCA_916701315.1_S-moseri_SEB-9	3083	3058	25	197	74	3354	This study
Sebastes_melanops	GCA_916701325.1_S_melanops_134856	2820	2798	22	401	133	3354	This study
Sebastes_itinus	GCA_916701335.1_S_itinus_130931	2961	2939	22	291	102	3354	This study
Sebastes_nivosus	GCA_916701345.1_S_nivosus_134373	3020	2997	23	239	95	3354	This study
Sebastes_saxicola	GCA_916701375.1_S-saxicola_KUI2167	3004	2984	20	254	96	3354	This study
Sebastes_semicinctus	GCA_916701385.1_S-semicinctus_xSEB-12	3058	3038	20	212	84	3354	This study
Sebastes_variegatus	GCA_916701405.1_S-variegatus_KUI3213	2826	2806	20	390	138	3354	This study
Sebastes_zacentrus	GCA_916701415.1_S-zacentrus_KUI3201	2882	2847	35	349	123	3354	This study
Sebastes_steindachneri	GCA_916701425.1_S_steindachneri_141714	2685	2663	22	501	168	3354	This study
Sebastes_rastrelliger	GCA_916701435.1_S-rastrelliger_xSEB-1	3067	3043	24	203	84	3354	This study
Sebastes_variabilis	GCA_916701445.1_S-variabilis_KUI2038	3023	2999	24	233	98	3354	This study
Sebastes_serriceps	GCA_916701455.1_S-serriceps_TREE_S68	2994	2973	21	244	116	3354	This study
Sebastes_trivittatus	GCA_916701465.1_S_trivittatus_137156	2918	2892	26	317	119	3354	This study
Sebastes_scythropus	GCA_916701475.1_S_scythropus_145769	3047	3026	21	216	91	3354	This study
Sebastes_proriger	GCA_916701495.1_S-proriger_KUI3229	2891	2865	26	337	126	3354	This study
Sebastes_polyspinis	GCA_916701505.1_S-polyspinis_KUI2030	2931	2911	20	301	122	3354	This study
Sebastes_ruberrimus	GCA_916701515.1_S-ruberrimus_582396486	2749	2725	24	451	154	3354	This study
Sebastes_reedi	GCA_916701525.1_S-reedi_SEB-7	3117	3090	27	169	68	3354	This study
Sebastes_rosenblatti	GCA_916701545.1_S-rosenblatti_SEB-147	2981	2959	22	269	104	3354	This study
Sebastes_rosaceus	GCA_916701555.1_S-rosaceus_SEB-73	3274	3138	136	18	62	3354	This study
Sebastes_taczanowskii	GCA_916701585.1_S_taczanowskii_133425	2853	2833	20	374	127	3354	This study
Sebastes_wilsoni	GCA_916701595.1_S-wilsoni_KUI3199	3008	2983	25	245	101	3354	This study
Sebastes_rubrivinctus	GCA_916701605.1_S-rubrivinctus_UW156309	3068	3046	22	206	80	3354	This study
Sebastes_vulpes	GCA_916701615.1_S_vulpes_130347	1283	1260	23	740	1331	3354	This study
Sebastes_thompsoni	GCA_916701625.1_S_thompsoni_137678	3013	2993	20	253	88	3354	This study
Sebastes_zonatus	GCA_916701635.1_S_zonatus_130348	2468	2438	30	644	242	3354	This study
Sebastolobus_alascanus	GCA_916701645.1_B-alascanus_SEB-31	3016	2967	49	255	83	3354	This study
Sebastiscus_albofasciatus	GCA_916701655.1_S_albofasciatus_133423	2922	2893	29	305	127	3354	This study
Sebastiscus_tertius	GCA_916701665.1_S_tertius_139529	2922	2904	18	325	107	3354	This study
Sebastolobus_altivelis	GCA_916701675.1_B-altivelis_xSEB-32	2883	2837	46	351	120	3354	This study
Nanger_dama	GCA_917880005.1_ORGONE_02	3105	2995	110	135	114	3354	This study
Ara_rubrogenys	GCA_917880015.2_bAraRub1_ORGONE04	3256	3209	47	36	62	3354	This study
Poeciliopsis_turneri	GCA_922788865.1_HVK001PTURNERI	3263	3247	16	41	50	3354	This study
Macaca_nigra	GCA_928851695.1_mMacNir1.1	3218	3118	100	83	53	3354	This study
Tragelaphus_eurycerus	GCA_935064755.1_mTraEur1.1	3262	3103	159	45	47	3354	This study
Trematomus_scotti	GCA_943590805.1_fTreSco1	1416	1396	20	1154	784	3354	This study
Bovichtus_diacanthus	GCA_943590825.1_fBovDia2	3008	2991	17	214	132	3354	This study
Cryodraco_antarcticus	GCA_943590835.1_fCryAnt1	2570	2547	23	454	330	3354	This study
Akarotaxis_nudiceps	GCA_943590845.1_fAkaNud1	2321	2300	21	601	432	3354	This study
Notothenia_rossii	GCA_943590865.1_fNotRos1	2649	2633	16	413	292	3354	This study
Vomeridens_infuscipinnis	GCA_943590875.1_fVomInf1	2047	2028	19	821	486	3354	This study
Histiodraco_velifer	GCA_943590885.1_fHisVel1	2562	2543	19	484	308	3354	This study
Pagetopsis_macropterus	GCA_943590895.1_fPagMac1	2512	2494	18	477	365	3354	This study
Lindbergichthys_nudifrons	GCA_943590975.1_fLepNud1	2765	2745	20	337	252	3354	This study
Dolloidraco_longedorsalis	GCA_943591025.1_fDolLon1	2218	2197	21	730	406	3354	This study
Gobionotothen_gibberifrons	GCA_943591055.1_fGobGib1	2531	2511	20	441	382	3354	This study
Bathydraco_marri	GCA_943591095.1_fBatMar1	1577	1564	13	1147	630	3354	This study
Lepidonotothen_squamifrons	GCA_943593335.1_fLepSqu1	1999	1981	18	922	433	3354	This study
Trematomus_hansoni	GCA_943593355.1_fTreHan1	2102	2080	22	775	477	3354	This study
Bovichtus_variegatus	GCA_943593645.1_fBovVar2	3013	3003	10	203	138	3354	This study
Chaenodraco_wilsoni	GCA_943593825.1_fChaWil1	2466	2439	27	511	377	3354	This study
Chionobathyscus_dewitti	GCA_943594065.1_fChiDew1	1926	1908	18	898	530	3354	This study
Lepidonotothen_larseni	GCA_943594155.1_fLepLar1	1337	1315	22	1178	839	3354	This study
Phodopus_roborovskii	GCA_943737965.1_PHOROB	3287	3166	121	26	41	3354	This study
Chinchilla_lanigera	GCF_000276665.1_ChiLan1.0	3234	3177	57	61	59	3354	This study
Pteropus_alecto	GCF_000325575.1_ASM32557v1	3236	3217	19	66	52	3354	This study
Cyprinodon_variegatus	GCF_000732505.1_C_variegatus-1.0	3147	3118	29	110	97	3354	This study
Nanorana_parkeri	GCF_000935625.1_ASM93562v1	3099	3047	52	143	112	3354	This study
Homo_sapiens	GCA_000001405.29_GRCh38.p14	3247	3108	139	67	40	3354	This study
Mus_musculus	GCA_000001635.9_GRCm39	3295	3166	129	20	39	3354	This study
Danio_rerio	GCA_000002035.4_GRCz11	3210	3165	45	79	65	3354	This study
Monodelphis_domestica	GCA_000002295.1_ASM229v1	3171	3036	135	90	93	3354	This study
Sus_scrofa	GCA_000003025.6_Sscrofa11.1	3272	3242	30	43	39	3354	This study
Oryctolagus_cuniculus	GCA_000003625.1_OryCun2.0	3070	2956	114	133	151	3354	This study
Xenopus_tropicalis	GCA_000004195.4_UCB_Xtro_10.0	3262	3229	33	33	59	3354	This study
Anolis_carolinensis	GCA_000090745.2_AnoCar2.0	2963	2924	39	175	216	3354	This study
Meleagris_gallopavo	GCA_000146605.4_Turkey_5.1	2774	2755	19	384	196	3354	This study
Microcebus_murinus	GCA_000165445.3_Mmur_3.0	3273	3109	164	46	35	3354	This study
Maylandia_zebra	GCA_000238955.5_M_zebra_UMD2a	3302	3219	83	25	27	3354	This study
Chrysemys_picta_bellii	GCA_000241765.5_Chrysemys_picta_BioNano-3.0.4	3251	3224	27	60	43	3354	This study
Lepisosteus_oculatus	GCA_000242695.1_LepOcu1	3088	3066	22	156	110	3354	This study
Bos_indicus	GCA_000247795.2_Bos_indicus_1.0	3081	2987	94	103	170	3354	This study
Ficedula_albicollis	GCA_000247815.2_FicAlb1.5	3086	3062	24	124	144	3354	This study
Microtus_ochrogaster	GCA_000317375.1_MicOch1.0	3239	3138	101	56	59	3354	This study
Chlorocebus_sabaeus	GCA_000409795.2_Chlorocebus_sabeus_1.1	3228	3115	113	78	48	3354	This study
Cynoglossus_semilaevis	GCA_000523025.1_Cse_v1.0	3239	3190	49	50	65	3354	This study
Poecilia_reticulata	GCA_000633615.2_Guppy_female_1.0_MT	3215	3204	11	65	74	3354	This study
Corvus_cornix_cornix	GCA_000738735.6_ASM73873v6	3048	3025	23	70	236	3354	This study
Nasalis_larvatus	GCA_000772465.1_Charlie1.0	2123	2056	67	737	494	3354	This study
Camelus_dromedarius	GCA_000803125.3_CamDro3	3284	3248	36	34	36	3354	This study
Larimichthys_crocea	GCA_000972845.2_L_crocea_2.0	3292	3275	17	22	40	3354	This study
Capra_aegagrus	GCA_000978405.1_CapAeg_1.0	3051	2952	99	192	111	3354	This study
Xiphophorus_couchianus	GCA_001444195.3_X_couchianus-1.0	3294	3282	12	22	38	3354	This study
Nothobranchius_furzeri	GCA_001465895.2_Nfu_20140520	3203	3180	23	93	58	3354	This study
Parus_major	GCA_001522545.3_Parus_major1.1	3125	3103	22	81	148	3354	This study
Coturnix_japonica	GCA_001577835.2_Coturnix_japonica_2.1	3230	3212	18	50	74	3354	This study
Kryptolebias_marmoratus	GCA_001649575.2_ASM164957v2	3270	3259	11	35	49	3354	This study
Ictalurus_punctatus	GCA_001660625.2_IpCoco_1.2	3253	3144	109	36	65	3354	This study
Passer_domesticus	GCA_001700915.1_Passer_domesticus-1.0	3050	3027	23	133	171	3354	This study
Capra_hircus	GCA_001704415.2_ARS1.2	3262	3138	124	48	44	3354	This study
Setophaga_coronata_coronata	GCA_001746935.2_mywa_2.1	2710	2690	20	302	342	3354	This study
Oreochromis_niloticus	GCA_001858045.3_O_niloticus_UMD_NMBU	3297	3275	22	27	30	3354	This study
Lycaon_pictus	GCA_001883655.1_LycPicKen1.0	3201	3116	85	81	72	3354	This study
Columba_livia	GCA_001887795.1_colLiv2	2812	2797	15	133	409	3354	This study
Paralichthys_olivaceus	GCA_001904815.2_ParOli_1.1	3266	3254	12	38	50	3354	This study
Ailuropoda_melanoleuca	GCA_002007445.3_ASM200744v3	3240	3201	39	67	47	3354	This study
Oncorhynchus_kisutch	GCA_002021735.2_Okis_V2	3307	1901	1406	25	22	3354	This study
Numida_meleagris	GCA_002078875.2_NumMel1.0	3168	3147	21	79	107	3354	This study
Cervus_elaphus_hippelaphus	GCA_002197005.1_CerEla1.0	2764	2709	55	384	206	3354	This study
Neomonachus_schauinslandi	GCA_002201575.2_ASM220157v2	3253	3148	105	57	44	3354	This study
Oryzias_latipes	GCA_002234675.1_ASM223467v1	3236	3217	19	33	85	3354	This study
Bos_taurus	GCA_002263795.3_ARS-UCD1.3	3257	3159	98	54	43	3354	This study
Anas_platyrhynchos_platyrhynchos	GCA_002743455.1_CAU_duck1.0	2984	2957	27	229	141	3354	This study
Xiphophorus_maculatus	GCA_002775205.2_X_maculatus-5.0-male	3299	3283	16	21	34	3354	This study
Piliocolobus_tephrosceles	GCA_002776525.4_ASM277652v4	3210	3057	153	89	55	3354	This study
Physeter_catodon	GCA_002837175.2_ASM283717v2	3187	3053	134	113	54	3354	This study
Equus_caballus	GCA_002863925.1_EquCab3.0	3272	3224	48	47	35	3354	This study
Pan_troglodytes	GCA_002880755.3_Clint_PTRv2	3233	3119	114	71	50	3354	This study
Pongo_abelii	GCA_002880775.3_Susie_PABv2	3257	3145	112	56	41	3354	This study
Salvelinus_sp_IW2-2015	GCA_002910315.2_ASM291031v2	2991	1856	1135	161	202	3354	This study
Ambystoma_mexicanum	GCA_002915635.3_AmbMex60DD	2965	2965	0	0	389	3354	https://doi.org/10.1073/pnas.2017176118
Oryzias_melastigma	GCA_002922805.2_ASM292280v2	3267	3247	20	46	41	3354	This study
Amphiprion_percula	GCA_003047355.2_Nemo_v1.1	3291	3267	24	23	40	3354	This study
Canis_lupus_dingo	GCA_003254725.2_ASM325472v2	3279	3162	117	40	35	3354	This study
Theropithecus_gelada	GCA_003255815.1_Tgel_1.0	3235	3105	130	80	39	3354	This study
Xiphophorus_hellerii	GCA_003331165.2_Xiphophorus_hellerii-4.1	3293	3253	40	24	37	3354	This study
Macaca_mulatta	GCA_003339765.3_Mmul_10	3249	3115	134	66	39	3354	This study
Carassius_auratus	GCA_003368295.1_ASM336829v1	3300	1294	2006	23	31	3354	This study
Bos_indicus_x_Bos_taurus	GCA_003369695.2_UOA_Brahman_1	3249	3161	88	52	53	3354	This study
Crotalus_viridis_viridis	GCA_003400415.2_UTA_CroVir_3.0	2901	2873	28	232	221	3354	This study
Cricetulus_griseus	GCA_003668045.2_CriGri-PICRH-1.0	3281	3204	77	37	36	3354	This study
Peromyscus_maniculatus_bairdii	GCA_003704035.3_HU_Pman_2.1.3	3251	3151	100	53	50	3354	This study
Peromyscus_polionotus_subgriseus	GCA_003704135.2_HU_Ppol_1.3.3	3262	3165	97	47	45	3354	This study
Takifugu_flavidus	GCA_003711565.2_ASM371156v2	3217	3190	27	42	95	3354	This study
Junco_hyemalis	GCA_003829775.2_dark-eyed_junco_22Sep2020_assembly	3081	3059	22	118	155	3354	This study
Calypte_anna	GCA_003957555.2_bCalAnn1_v1.p	3120	3098	22	65	169	3354	This study
Taeniopygia_guttata	GCA_003957565.4_bTaeGut1.4.pri	3203	3174	29	54	97	3354	This study
Oryzias_javanicus	GCA_003999625.1_OJAV_1.1	3263	3238	25	41	50	3354	This study
Chiloscyllium_plagiosum	GCA_004010195.1_ASM401019v1	3012	2953	59	182	160	3354	This study
Lateolabrax_maculatus	GCA_004023545.1_ASM402354v1	2460	2433	27	95	799	3354	This study
Takifugu_bimaculatus	GCA_004026145.2_XU_Tbim_1.0	3134	2980	154	68	152	3354	This study
Strigops_habroptila	GCA_004027225.2_bStrHab1.2.pri	3237	3182	55	45	72	3354	This study
Ornithorhynchus_anatinus	GCA_004115215.4_mOrnAna1.pri.v4	3093	3060	33	158	103	3354	This study
Rhinolophus_ferrumequinum	GCA_004115265.3_mRhiFer1_v1.p	3294	3209	85	27	33	3354	This study
Collichthys_lucidus	GCA_004119915.2_ASM411991v2	3217	2554	663	41	96	3354	This study
Phyllostomus_discolor	GCA_004126475.3_mPhyDis1.pri.v3	3257	3218	39	38	59	3354	This study
Podarcis_muralis	GCA_004329235.1_PodMur_1.0	3234	3162	72	44	76	3354	This study
Perca_flavescens	GCA_004354835.1_PFLA_1.0	3295	3279	16	25	34	3354	This study
Peromyscus_leucopus	GCA_004664715.2_UCI_PerLeu_2.1	3238	3088	150	42	74	3354	This study
Pyxicephalus_adspersus	GCA_004786255.1_Pads_1.0	3043	2998	45	155	156	3354	This study
Epinephelus_lanceolatus	GCA_005281545.1_ASM528154v1	3300	3280	20	27	27	3354	This study
Lonchura_striata_domestica	GCA_005870125.1_lonStrDom2	3174	3149	25	74	106	3354	This study
Bos_grunniens	GCA_005887515.2_BosGru3.0	3139	3054	85	79	136	3354	This study
Oncorhynchus_nerka	GCA_006149115.2_Oner_1.1	2950	1796	1154	176	228	3354	This study
Reinhardtius_hippoglossoides	GCA_006182925.3_UL_REHI_2.0	3274	3251	23	28	52	3354	This study
Suricata_suricatta	GCA_006229205.1_meerkat_22Aug2017_6uvM2_HiC	3232	3144	88	78	44	3354	This study
Epinephelus_moara	GCA_006386435.1_YSFRI_EMoa_1.0	3282	3266	16	33	39	3354	This study
Sus_scrofa_scrofa	GCA_006511355.2_NSME_pig_1.2	3258	3227	31	39	57	3354	This study
Nomascus_leucogenys	GCA_006542625.1_Asia_NLE_v1	3246	3107	139	60	48	3354	This study
Archocentrus_centrarchus	GCA_007364275.2_fArcCen1	3287	3251	36	18	49	3354	This study
Gopherus_evgoodei	GCA_007399415.1_rGopEvg1_v1.p	3281	3229	52	28	45	3354	This study
Lynx_canadensis	GCA_007474595.2_mLynCan4.pri.v2	3242	3208	34	66	46	3354	This study
Rhinopithecus_roxellana	GCA_007565055.1_ASM756505v1	3246	3088	158	68	40	3354	This study
Thylacinus_cynocephalus	GCA_007646695.3_UniMelb_ThyCyn2.0_hybrid_assembly	2995	2926	69	199	160	3354	This study
Kryptolebias_hermaphroditus	GCA_007896545.1_ASM789654v1	3267	3257	10	44	43	3354	This study
Coilia_nasus	GCA_007927625.1_knifefish_assembly_2.0	2802	2751	51	133	419	3354	This study
Gorilla_gorilla_gorilla	GCA_008122165.1_Kamilah_GGO_v0	3168	3064	104	75	111	3354	This study
Sander_lucioperca	GCA_008315115.2_SLUC_FBN_1.2	3308	3279	29	16	30	3354	This study
Lichenostomus_cassidix	GCA_008360975.2_HeHo_2.0	3243	3196	47	48	63	3354	This study
Triplophysa_tibetana	GCA_008369825.1_ASM836982v1	3260	3204	56	23	71	3354	This study
Mastomys_coucha	GCA_008632895.1_UCSF_Mcou_1	3252	3151	101	45	57	3354	This study
Alca_torda	GCA_008658365.1_bAlcTor1_primary	3189	3172	17	48	117	3354	This study
Phocoena_sinus	GCA_008692025.1_mPhoSin1.pri	3243	3139	104	63	48	3354	This study
Etheostoma_spectabile	GCA_008692095.1_UIUC_Espe_1.0	3115	3047	68	46	193	3354	This study
Papio_anubis	GCA_008728515.2_Panubis1.1	3190	3060	130	75	89	3354	This study
Plectropomus_leopardus	GCA_008729295.2_YSFRI_Pleo_2.0	3118	3065	53	145	91	3354	This study
Muntiacus_muntjak	GCA_008782695.1_UCB_Mmun_1.0	3257	3150	107	57	40	3354	This study
Pangasianodon_hypophthalmus	GCA_009078355.1_GENO_Phyp_1.0	3235	3205	30	34	85	3354	This study
Cairina_moschata_domestica	GCA_009194515.1_CaiMos1.0	3170	3150	20	98	86	3354	This study
Bos_grunniens_x_Bos_taurus	GCA_009493645.1_ARS_UNL_BGru_maternal_1.0_p	3259	3161	98	48	47	3354	This study
Corvus_moneduloides	GCA_009650955.1_bCorMon1.pri	3177	3150	27	66	111	3354	This study
Callithrix_jacchus	GCA_009663435.2_Callithrix_jacchus_cj1700_1.1	3277	3063	214	40	37	3354	This study
Leptobrachium_leishanense	GCA_009667805.1_ASM966780v1	3161	3077	84	97	96	3354	This study
Naja_naja	GCA_009733165.1_Nana_v5	3141	3099	42	82	131	3354	This study
Malurus_cyaneus_samueli	GCA_009741485.1_mCya_1.0	3084	3056	28	98	172	3354	This study
Lepus_timidus	GCA_009760805.1_CIBIO-ISEM_LeTim_1.1	2892	2798	94	286	176	3354	This study
Zalophus_californianus	GCA_009762305.2_mZalCal1.pri.v2	3276	3095	181	41	37	3354	This study
Notolabrus_celidotus	GCA_009762535.1_fNotCel1.pri	3178	3158	20	48	128	3354	This study
Pristis_pectinata	GCA_009764475.2_sPriPec2.1.pri	3113	3049	64	71	170	3354	This study
Dermochelys_coriacea	GCA_009764565.4_rDerCor1.pri.v4	3253	3230	23	33	68	3354	This study
Geothlypis_trichas	GCA_009764595.1_bGeoTri1.pri	3048	3012	36	69	237	3354	This study
Tauraco_erythrolophus	GCA_009769465.1_bTauEry1.pri	3177	3158	19	55	122	3354	This study
Pterocles_gutturalis	GCA_009769525.1_bPteGut1.pri	3174	3149	25	52	128	3354	This study
Thamnophis_elegans	GCA_009769535.1_rThaEle1.pri	3145	3089	56	68	141	3354	This study
Cyclopterus_lumpus	GCA_009769545.1_fCycLum1.pri	3247	3225	22	25	82	3354	This study
Bucorvus_abyssinicus	GCA_009769605.1_bBucAby1.pri	3211	3185	26	32	111	3354	This study
Cygnus_olor	GCA_009769625.2_bCygOlo1.pri.v2	3192	3169	23	60	102	3354	This study
Lacerta_agilis	GCA_009819535.1_rLacAgi1.pri	3269	3197	72	28	57	3354	This study
Merops_nubicus	GCA_009819595.1_bMerNub1.pri	3191	3158	33	54	109	3354	This study
Sterna_hirundo	GCA_009819605.1_bSteHir1.pri	3233	3196	37	43	78	3354	This study
Sylvia_atricapilla	GCA_009819655.1_bSylAtr1.pri	3153	3112	41	51	150	3354	This study
Hippoglossus_hippoglossus	GCA_009819705.1_fHipHip1.pri	3280	3257	23	18	56	3354	This study
Phoenicopterus_ruber_ruber	GCA_009819775.1_bPhoRub2.pri	3212	3183	29	46	96	3354	This study
Aythya_fuligula	GCA_009819795.1_bAytFul2.pri	3194	3171	23	59	101	3354	This study
Cariama_cristata	GCA_009819825.1_bCarCri1.pri	3229	3205	24	55	70	3354	This study
Catharus_ustulatus	GCA_009819885.2_bCatUst1.pri.v2	3225	3147	78	46	83	3354	This study
Thamnaconus_septentrionalis	GCA_009823395.1_ASM982339v1	3168	3151	17	36	150	3354	This study
Periophthalmus_magnuspinnatus	GCA_009829125.1_fPerMag1.pri	3236	3215	21	42	76	3354	This study
Chiroxiphia_lanceolata	GCA_009829145.1_bChiLan1.pri	3189	3173	16	44	121	3354	This study
Mustela_erminea	GCA_009829155.1_mMusErm1.Pri	3267	3212	55	34	53	3354	This study
Camelus_ferus	GCA_009834535.1_BCGSAC_Cfer_1.0	3277	3240	37	45	32	3354	This study
Balaenoptera_musculus	GCA_009873245.3_mBalMus1.pri.v3	3271	3126	145	48	35	3354	This study
Perca_fluviatilis	GCA_010015445.1_GENO_Pfluv_1.0	3266	3243	23	41	47	3354	This study
Cervus_hanglu_yarkandensis	GCA_010411085.1_CEY_v1	3268	3074	194	48	38	3354	This study
Acipenser_ruthenus	GCA_010645085.1_ASM1064508v1	3216	1254	1962	81	57	3354	This study
Amblyraja_radiata	GCA_010909765.2_sAmbRad1.1.pri	3052	2983	69	110	192	3354	This study
Petromyzon_marinus	GCA_010993605.1_kPetMar1.pri	2093	2004	89	395	866	3354	This study
Esox_lucius	GCA_011004845.1_fEsoLuc1.pri	3286	3250	36	25	43	3354	This study
Balearica_regulorum_gibbericeps	GCA_011004875.1_bBalReg1.pri	3242	3219	23	41	71	3354	This study
Rattus_rattus	GCA_011064425.1_Rrattus_CSIRO_v1	3197	3103	94	53	104	3354	This study
Stictonetta_naevosa	GCA_011074415.1_BPBGC_Snae_1.0	3177	3146	31	80	97	3354	This study
Heteronetta_atricapilla	GCA_011075105.1_BPBGC_Hatr_1.0	3185	3144	41	71	98	3354	This study
Nettapus_auritus	GCA_011076525.1_BPBGC_Naur_1.0	3187	3151	36	77	90	3354	This study
Oxyura_jamaicensis	GCA_011077185.1_BPBGC_Ojam_1.0	3189	3165	24	79	86	3354	This study
Trichosurus_vulpecula	GCA_011100635.1_mTriVul1.pri	3263	3059	204	40	51	3354	This study
Fundulus_heteroclitus	GCA_011125445.2_MU-UCD_Fhet_4.1	3272	3194	78	34	48	3354	This study
Epinephelus_fuscoguttatus	GCA_011397635.1_E.fuscoguttatus.final_Chr_v1	3317	3295	22	15	22	3354	This study
Poecile_atricapillus	GCA_011421415.1_CUB_Patr_1.0	3119	3101	18	105	130	3354	This study
Arvicanthis_niloticus	GCA_011762505.1_mArvNil1.pat.X	3278	3175	103	28	48	3354	This study
Tursiops_truncatus	GCA_011762595.1_mTurTru1.mat.Y	3244	3112	132	67	43	3354	This study
Zootoca_vivipara	GCA_011800845.1_UG_Zviv_1	3269	3224	45	33	52	3354	This study
Siniperca_knerii	GCA_011952075.1_sinKne6b	3287	3281	6	31	36	3354	This study
Siniperca_scherzeri	GCA_011952095.1_sinSch6b	3274	3259	15	35	45	3354	This study
Coreoperca_whiteheadi	GCA_011952105.1_corWhi6b	3292	3278	14	29	33	3354	This study
Melopsittacus_undulatus	GCA_012275295.1_bMelUnd1.mat.Z	3258	3204	54	31	65	3354	This study
Ameiurus_melas	GCA_012411365.1_AMELA_1.0	3244	3212	32	41	69	3354	This study
Onychostoma_macrolepis	GCA_012432095.1_ASM1243209v1	3281	3241	40	19	54	3354	This study
Molothrus_ater	GCA_012460135.1_BPBGC_Mater_1.0	3183	3147	36	49	122	3354	This study
Macaca_fascicularis	GCA_012559485.3_MFA1912RKSv2	3254	3151	103	61	39	3354	This study
Oncorhynchus_keta	GCA_012931545.1_Oket_V1	2893	1856	1037	204	257	3354	This study
Poecilia_formosa	GCA_013036085.2_Poecilia_formosa_haplotype_mexicana	3244	3197	47	27	83	3354	This study
Pan_paniscus	GCA_013052645.3_Mhudiblu_PPA_v2	3236	3118	118	66	52	3354	This study
Trachemys_scripta_elegans	GCA_013100865.1_CAS_Tse_1.0	3161	3134	27	63	130	3354	This study
Etheostoma_cragini	GCA_013103735.1_CSU_Ecrag_1.0	3120	3108	12	103	131	3354	This study
Cromileptes_altivelis	GCA_013133815.1_SYSU_Calt_1.1	3248	3227	21	16	90	3354	This study
Oncorhynchus_mykiss	GCA_013265735.3_USDA_OmykA_1.1	3306	1829	1477	23	25	3354	This study
Verasper_variegatus	GCA_013332515.1_ysfri_vvar_1.0	3288	3265	23	25	41	3354	This study
Anguilla_anguilla	GCA_013347855.1_fAngAng1.pri	3254	2990	264	42	58	3354	This study
Antennarius_maculatus	GCA_013358685.1_fAntMac1.pri	3264	3228	36	29	61	3354	This study
Electrophorus_electricus	GCA_013358815.1_fEleEle1.pri	3284	3252	32	21	49	3354	This study
Oreochromis_aureus	GCA_013358895.1_ZZ_aureus	3303	3278	25	21	30	3354	This study
Megalops_cyprinoides	GCA_013368585.1_fMegCyp1.pri	3286	2922	364	33	35	3354	This study
Nyctibius_grandis	GCA_013368605.1_bNycGra1.pri	3207	3173	34	48	99	3354	This study
Oryctolagus_cuniculus_cuniculus	GCA_013371645.1_OryCun3.0	3242	3096	146	65	47	3354	This study
Rhegmatorhina_hoffmannsi	GCA_013398505.2_LSU_RhHo_2.0	3073	3059	14	159	122	3354	This study
Coloeus_monedula	GCA_013407035.1_ASM1340703v1	3024	3000	24	117	213	3354	This study
Amphilophus_citrinellus	GCA_013435755.1_ASM1343575v1	3306	3264	42	13	35	3354	This study
Giraffa_tippelskirchi	GCA_013496395.1_ASM1349639v1	3246	3176	70	58	50	3354	This study
Gasterosteus_nipponicus	GCA_014132575.2_Gnip_1.0	3233	3201	32	51	70	3354	This study
Bos_gaurus	GCA_014182915.2_ARS_UOA_Gaur_1.1	3254	3154	100	51	49	3354	This study
Sciaenops_ocellatus	GCA_014183145.1_ASM1418314v1	3155	3097	58	118	81	3354	This study
Nibea_albiflora	GCA_014281875.1_ASM1428187v1	3288	3184	104	23	43	3354	This study
Canis_lupus_familiaris	GCA_014441545.1_ROS_Cfam_1.0	3273	3149	124	43	38	3354	This study
Ovis_orientalis	GCA_014523465.1_CAU_Oori_1.0	3269	3131	138	47	38	3354	This study
Entosphenus_tridentatus	GCA_014621495.2_ETRf_v1	1660	1612	48	482	1212	3354	This study
Ochotona_princeps	GCA_014633375.1_OchPri4.0	3107	3056	51	161	86	3354	This study
Sebastes_schlegelii	GCA_014673565.1_ASM1467356v1	3268	3222	46	26	60	3354	This study
Podarcis_muralis_nigriventris	GCA_014706415.1_LU_Pmuni_1.1	3206	3164	42	55	93	3354	This study
Silurus_meridionalis	GCA_014805685.1_ASM1480568v1	3218	3191	27	26	110	3354	This study
Anableps_anableps	GCA_014839685.1_fAnaAna1.pri	3299	3284	15	19	36	3354	This study
Sylvia_borin	GCA_014839755.1_bSylBor1.pri	3201	3175	26	51	102	3354	This study
Dryobates_pubescens	GCA_014839835.1_bDryPub1.pri	3178	3151	27	56	120	3354	This study
Xenentodon_cancila	GCA_014839995.1_fXenCan1.pri	3281	3265	16	25	48	3354	This study
Bufo_gargarizans	GCA_014858855.1_ASM1485885v1	3051	2940	111	100	203	3354	This study
Nematolebias_whitei	GCA_014905685.2_NemWhi1	3104	3080	24	149	101	3354	This study
Falco_rusticolus	GCA_015220075.1_bFalRus1.pri	3205	3177	28	60	89	3354	This study
Choloepus_didactylus	GCA_015220235.1_mChoDid1.pri	3286	2971	315	31	37	3354	This study
Pygocentrus_nattereri	GCA_015220715.1_fPygNat1.pri	3301	3269	32	18	35	3354	This study
Sebastes_umbrosus	GCA_015220745.1_fSebUmb1.pri	3273	3255	18	22	59	3354	This study
Pogoniulus_pusillus	GCA_015220805.1_bPogPus1.pri	3190	3166	24	38	126	3354	This study
Rattus_norvegicus	GCA_015227675.2_mRatBN7.2	3285	3161	124	32	37	3354	This study
Hirundo_rustica	GCA_015227805.3_bHirRus1.pri.v3	3182	3154	28	63	109	3354	This study
Colaptes_auratus	GCA_015227895.2_Caur_TTU_1.0	2999	2837	162	109	246	3354	This study
Chelonia_mydas	GCA_015237465.2_rCheMyd1.pri.v2	3282	3245	37	36	36	3354	This study
Pao_palembangensis	GCA_015343265.1_ASM1534326v1	3229	3194	35	48	77	3354	This study
Anas_platyrhynchos	GCA_015476345.1_ZJU1.0	3163	3130	33	67	124	3354	This study
Fringilla_coelebs_coelebs	GCA_015532645.2_FrCoel.v2	3031	3012	19	137	186	3354	This study
Lethenteron_reissneri	GCA_015708825.1_ASM1570882v1	1913	1784	129	390	1051	3354	This study
Sylvilagus_bachmani	GCA_015711505.1_Sylvilagus_bachmani_HiC	3139	3025	114	150	65	3354	This study
Hydrochoerus_hydrochaeris	GCA_015741225.1_Hydrochoerus_hydrochaeris_HiC	3214	3159	55	83	57	3354	This study
Motacilla_alba_alba	GCA_015832195.1_Motacilla_alba_V1.0_pri	3138	3114	24	59	157	3354	This study
Triplophysa_dalaica	GCA_015846415.1_ASM1584641v1	3240	3200	40	20	94	3354	This study
Tachyglossus_aculeatus	GCA_015852505.1_mTacAcu1.pri	3142	3114	28	100	112	3354	This study
Lamprotornis_superbus	GCA_015883425.2_CU_Lasu_v2	3181	3159	22	64	109	3354	This study
Equus_asinus	GCA_016077325.2_ASM1607732v2	3275	3222	53	40	39	3354	This study
Dromaius_novaehollandiae	GCA_016128335.1_ZJU1.0	3210	3190	20	48	96	3354	This study
Mauremys_reevesii	GCA_016161935.1_ASM1616193v1	3295	3244	51	24	35	3354	This study
Neoceratodus_forsteri	GCA_016271365.1_neoFor_v3	1733			617	236	2586	https://doi.org/10.1038/s41586-021-03198-8
Salvelinus_namaycush	GCA_016432855.1_SaNama_1.0	3188	1819	1369	80	86	3354	This study
Antechinus_flavipes	GCA_016432865.1_AdamAnt	3228	3151	77	43	83	3354	This study
Gracilinanus_agilis	GCA_016433145.1_AgileGrace	3147	3001	146	143	64	3354	This study
Prionailurus_bengalensis	GCA_016509475.2_Fcat_Pben_1.1_paternal_pri	3271	3227	44	48	35	3354	This study
Gallus_gallus	GCA_016699485.1_bGalGal1.mat.broiler.GRCg7b	3208	3192	16	60	86	3354	This study
Mugilogobius_chulae	GCA_016735935.1_ASM1673593v1	3096	3050	46	114	144	3354	This study
Ovis_aries	GCA_016772045.1_ARS-UI_Ramb_v2.0	3262	3137	125	50	42	3354	This study
Sceloporus_tristichus	GCA_016801065.1_ASM1680106v1	3235	3191	44	56	63	3354	This study
Polydactylus_sextarius	GCA_016801845.1_ASM1680184v1	3234	3224	10	20	100	3354	This study
Toxotes_chatareus	GCA_016801885.1_ASM1680188v1	3110	3102	8	30	214	3354	This study
Platichthys_stellatus	GCA_016801935.1_ASM1680193v1	3260	3236	24	38	56	3354	This study
Polypterus_senegalus	GCA_016835505.1_ASM1683550v1	3099	3058	41	137	118	3354	This study
Xiphias_gladius	GCA_016859285.1_ASM1685928v1	3290	3278	12	30	34	3354	This study
Istiophorus_platypterus	GCA_016859345.1_ASM1685934v1	3219	3211	8	29	106	3354	This study
Ictidomys_tridecemlineatus	GCA_016881025.1_HiC_Itri_2	3206	3136	70	92	56	3354	This study
Acanthisitta_chloris	GCA_016904835.1_bAcaChl1.pri	3164	3138	26	59	131	3354	This study
Phacochoerus_africanus	GCA_016906955.1_ROS_Pafr_v1	3273	3244	29	38	43	3354	This study
Gasterosteus_aculeatus_aculeatus	GCA_016920845.1_GAculeatus_UGA_version5	3244	3177	67	37	73	3354	This study
Hepsetus_odoe	GCA_017165825.1_ASM1716582v1	3227	3187	40	67	60	3354	This study
Alosa_alosa	GCA_017589495.2_AALO_Geno_1.1	3106	3063	43	66	182	3354	This study
Amia_calva	GCA_017591415.1_AmiCal1	3215	3193	22	83	56	3354	This study
Giraffa_camelopardalis_rothschildi	GCA_017591445.1_ASM1759144v1	3261	3113	148	43	50	3354	This study
Myiopsitta_monachus	GCA_017639245.1_MMon_1.0	3238	3196	42	41	75	3354	This study
Amazona_aestiva	GCA_017639355.1_Aaes_hic	3071	3054	17	135	148	3354	This study
Pluvialis_apricaria	GCA_017639485.1_bPluApr1.pri	3196	3169	27	55	103	3354	This study
Carcharodon_carcharias	GCA_017639515.1_sCarCar2.pri	3163	3082	81	88	103	3354	This study
Ciconia_maguari	GCA_017639555.1_bCicMag1.pri	3196	3175	21	55	103	3354	This study
Falco_naumanni	GCA_017639655.1_bFalNau1.pat	3209	3181	28	53	92	3354	This study
Aplochiton_taeniatus	GCA_017639675.1_fAplTae1.pri	2891	2865	26	78	385	3354	This study
Melanotaenia_boesemani	GCA_017639745.1_fMelBoe1.pri	3310	3282	28	16	28	3354	This study
Polyodon_spathula	GCA_017654505.1_ASM1765450v1	3228	1782	1446	83	43	3354	This study
Xenopus_laevis	GCA_017654675.1_Xenopus_laevis_v10.1	3290	1930	1360	21	43	3354	This study
Chelmon_rostratus	GCA_017976325.1_fCheRos1.pri	3315	3297	18	11	28	3354	This study
Cuculus_canorus	GCA_017976375.1_bCucCan1.pri	3229	3204	25	49	76	3354	This study
Toxotes_jaculatrix	GCA_017976425.1_fToxJac2.pri	3309	3303	6	15	30	3354	This study
Cairina_moschata	GCA_018104995.1_ASM1810499v1	3097	3067	30	118	139	3354	This study
Heterotis_niloticus	GCA_018136845.1_ASM1813684v1	3276	3098	178	29	49	3354	This study
Gymnogyps_californianus	GCA_018139145.1_ASM1813914v1	3123	3096	27	50	181	3354	This study
Bos_taurus_x_Bison_bison	GCA_018282465.1_ARS_Simm1.0	3258	3167	91	52	44	3354	This study
Oncorhynchus_tshawytscha	GCA_018296145.1_Otsh_v2.0	3294	1973	1321	28	32	3354	This study
Cheilinus_undulatus	GCA_018320785.1_ASM1832078v1	3274	3259	15	23	57	3354	This study
Cyprinus_carpio	GCA_018340385.1_ASM1834038v1	3283	1262	2021	29	42	3354	This study
Vulpes_lagopus	GCA_018345385.1_ASM1834538v1	3268	3137	131	33	53	3354	This study
Leopardus_geoffroyi	GCA_018350155.1_O.geoffroyi_Oge1_pat1.0	3273	3238	35	49	32	3354	This study
Felis_catus	GCA_018350175.1_F.catus_Fca126_mat1.0	3265	3227	38	54	35	3354	This study
Panthera_tigris	GCA_018350195.2_P.tigris_Pti1_mat1.1	3280	3238	42	43	31	3354	This study
Panthera_leo	GCA_018350215.1_P.leo_Ple1_pat1.1	3226	3194	32	53	75	3354	This study
Hippocampus_abdominalis	GCA_018466805.1_ZJU1.0	3220	3191	29	51	83	3354	This study
Alosa_sapidissima	GCA_018492685.1_fAloSap1.pri	3262	3222	40	41	51	3354	This study
Anguilla_rostrata	GCA_018555375.2_ASM1855537v1.1	3230	2988	242	67	57	3354	This study
Certhia_americana	GCA_018697195.1_ASM1869719v1	3122	3088	34	93	139	3354	This study
Paracanthobrama_guichenoti	GCA_018749465.1_ASM1874946v1	3264	3151	113	39	51	3354	This study
Megalobrama_amblycephala	GCA_018812025.1_ASM1881202v1	3283	3247	36	31	40	3354	This study
Puntigrus_tetrazona	GCA_018831695.1_ASM1883169v1	3296	3147	149	20	38	3354	This study
Leptobrachium_ailaonicum	GCA_018994145.1_ASM1899414v1	2858	2802	56	215	281	3354	This study
Channa_argus	GCA_018997905.1_ASM1899790v1	3242	3226	16	25	87	3354	This study
Diglossa_brunneiventris	GCA_019023105.1_LSU_DiBr_2.0	3130	3092	38	73	151	3354	This study
Hemibagrus_wyckioides	GCA_019097595.1_SWU_Hwy_1.0	3254	3219	35	24	76	3354	This study
[truncated: 211 more rows]

## Sheet: b-NumberOfGene_per_Species
species	number.Complete7tm_OR_alpha	number.Complete7tm_OR_beta	number.Complete7tm_OR_delta	number.Complete7tm_OR_epsilon	number.Complete7tm_OR_eta	number.Complete7tm_OR_gamma	number.Complete7tm_OR_kappa	number.Complete7tm_OR_lambda	number.Complete7tm_OR_Lamp-a	number.Complete7tm_OR_Lamp-b	number.Complete7tm_OR_Lamp-c	number.Complete7tm_OR_theta	number.Complete7tm_OR_zeta	number.Complete7tm_OR_Total	number.Completeno7tm_OR_alpha	number.Completeno7tm_OR_beta	number.Completeno7tm_OR_delta	number.Completeno7tm_OR_epsilon	number.Completeno7tm_OR_eta	number.Completeno7tm_OR_gamma	number.Completeno7tm_OR_kappa	number.Completeno7tm_OR_lambda	number.Completeno7tm_OR_Lamp-a	number.Completeno7tm_OR_Lamp-b	number.Completeno7tm_OR_Lamp-c	number.Completeno7tm_OR_theta	number.Completeno7tm_OR_zeta	number.Completeno7tm_OR_Total	number.Complete_OR_Total	number.Ambiguous_OR_alpha	number.Ambiguous_OR_beta	number.Ambiguous_OR_delta	number.Ambiguous_OR_epsilon	number.Ambiguous_OR_eta	number.Ambiguous_OR_gamma	number.Ambiguous_OR_kappa	number.Ambiguous_OR_lambda	number.Ambiguous_OR_Lamp-b	number.Ambiguous_OR_Lamp-c	number.Ambiguous_OR_theta	number.Ambiguous_OR_zeta	number.Ambiguous_OR_Total	number.Edge_OR_alpha	number.Edge_OR_beta	number.Edge_OR_delta	number.Edge_OR_epsilon	number.Edge_OR_eta	number.Edge_OR_gamma	number.Edge_OR_kappa
Loxodonta_africana	204	1	0	0	0	1686	1	0	0	0	0	0	0	1892	24	2	0	0	0	360	0	0	0	0	0	0	0	386	2278	5	0	0	0	0	68	0	0	0	0	0	0	73	7	0	0	0	0	115	0
Notamacropus_eugenii	90	0	0	0	0	515	0	0	0	0	0	0	0	605	29	1	0	0	0	129	0	0	0	0	0	0	0	159	764	47	1	0	0	0	203	0	0	0	0	1	0	252	56	1	0	0	0	299	0
Myotis_lucifugus	117	1	0	0	0	406	2	0	0	0	0	0	0	526	4	0	0	0	0	32	0	0	0	0	0	0	0	36	562	0	0	0	0	0	10	0	0	0	0	0	0	10	0	0	0	0	0	13	0
Mchenga_conophoros	0	0	2	0	0	0	0	0	0	0	0	0	1	3	0	0	0	0	0	0	0	0	0	0	0	0	0	0	3	0	0	3	1	0	0	0	0	0	0	0	2	6	0	1	3	0	4	0	0
Labeotropheus_fuelleborni	0	0	2	0	0	0	0	0	0	0	0	0	0	2	0	0	2	0	1	0	0	0	0	0	0	0	0	3	5	0	0	3	0	1	0	0	0	0	0	0	0	4	0	0	4	0	1	0	0
Melanochromis_auratus	0	0	2	0	0	0	0	0	0	0	0	0	0	2	0	0	2	0	0	0	0	0	0	0	0	0	0	2	4	0	0	0	0	1	0	0	0	0	0	0	0	1	0	0	8	0	4	0	0
Rhamphochromis_esox	0	0	2	0	1	0	0	0	0	0	0	0	0	3	0	0	0	0	0	0	0	1	0	0	0	0	0	1	4	0	0	0	0	1	0	0	0	0	0	0	0	1	0	0	7	0	3	0	0
Cavia_porcellus	132	1	0	0	0	626	1	0	0	0	0	2	0	762	27	1	0	0	0	129	0	0	0	0	0	0	0	157	919	4	0	0	0	0	31	0	0	0	0	0	0	35	8	0	0	0	0	42	0
Pteropus_vampyrus	99	0	0	0	0	374	0	0	0	0	0	0	0	473	4	1	0	0	0	53	0	0	0	0	0	0	0	58	531	16	0	0	0	0	93	0	0	0	0	0	0	109	10	0	0	0	0	145	0
Dipodomys_ordii	78	1	0	0	0	728	0	0	0	0	0	1	0	808	4	1	0	0	0	67	0	0	0	0	0	0	0	72	880	4	0	0	0	0	35	0	0	0	0	0	0	39	3	0	0	0	0	46	0
Choloepus_hoffmanni	233	1	0	0	0	1308	1	0	0	0	0	1	0	1544	58	0	0	0	0	368	0	0	0	0	0	0	0	426	1970	11	0	0	0	0	25	0	0	0	0	0	0	36	162	0	0	0	0	448	0
Carlito_syrichta	117	0	0	0	0	294	1	0	0	0	0	0	0	412	4	1	0	0	0	50	0	0	0	0	0	0	0	55	467	0	0	0	0	0	6	0	0	0	0	0	0	6	9	0	0	0	0	60	0
Vicugna_pacos	72	2	0	0	0	403	1	0	0	0	0	0	0	478	4	0	0	0	0	78	0	0	0	0	0	0	0	82	560	4	0	0	0	0	160	0	0	0	0	0	0	164	11	0	0	0	0	192	0
Tetraodon_nigroviridis	0	1	24	1	11	0	1	0	0	0	0	1	2	41	0	0	6	1	3	0	0	0	0	0	0	0	0	10	51	0	0	1	0	0	0	0	0	0	0	0	0	1	0	0	17	0	4	0	0
Sorex_araneus	142	2	0	0	0	924	1	0	0	0	0	0	0	1069	3	0	0	0	0	93	0	0	0	0	0	0	0	96	1165	3	0	0	0	0	114	0	0	0	0	0	0	117	2	0	0	0	0	96	0
Otolemur_garnettii	167	1	0	0	0	565	1	0	0	0	0	1	0	735	12	1	0	0	0	49	0	0	0	0	0	0	0	62	797	7	0	0	0	0	51	0	0	0	0	0	0	58	6	0	0	0	0	34	0
Tupaia_belangeri	82	1	0	0	0	491	0	0	0	0	0	0	0	574	28	1	0	0	0	189	0	0	0	0	0	0	0	218	792	0	0	0	0	0	0	0	0	0	0	0	0	0	72	1	0	0	0	397	1
Python_bivittatus	21	1	0	0	0	419	1	0	0	0	0	1	0	443	3	0	0	0	0	77	0	0	0	0	0	0	0	80	523	6	0	0	0	0	262	0	0	0	0	0	0	268	20	0	0	0	0	384	0
Dasypus_novemcinctus	181	1	0	0	0	1270	1	0	0	0	0	1	0	1454	19	0	0	0	0	247	0	0	0	0	0	0	0	266	1720	17	2	0	0	0	147	0	0	0	0	0	0	166	16	0	0	0	0	88	0
Latimeria_chalumnae	6	0	58	0	17	15	3	0	0	0	0	2	23	124	3	0	15	0	0	4	1	0	0	1	0	0	23	47	171	0	0	3	1	0	1	0	0	0	0	0	5	10	2	1	6	2	1	1	0
Pelodiscus_sinensis	577	1	0	0	0	605	1	0	0	0	0	1	0	1185	89	0	0	0	0	90	0	0	0	0	0	0	0	179	1364	19	0	0	0	0	15	0	0	0	0	0	0	34	27	0	0	0	0	43	0
Leucoraja_erinacea	0	0	0	0	0	0	0	0	0	0	0	3	0	3	0	0	0	0	0	0	1	0	0	0	0	0	0	1	4	0	0	0	0	0	0	0	0	0	0	0	0	0	1	0	0	0	0	0	0
Pundamilia_nyererei	0	1	55	3	11	0	1	1	0	0	0	1	12	85	0	0	13	0	0	1	0	0	0	0	0	0	2	16	101	0	2	7	0	6	0	0	0	0	0	0	3	18	0	0	7	3	3	0	0
Neolamprologus_brichardi	0	3	37	4	14	0	1	1	0	0	0	1	9	70	0	0	4	0	1	1	0	0	0	0	0	0	3	9	79	0	0	8	2	5	0	0	0	0	0	0	2	17	0	0	8	0	3	0	0
Trichechus_manatus_latirostris	28	0	0	0	0	417	1	0	0	0	0	0	0	446	7	1	0	0	0	110	0	0	0	0	0	0	0	118	564	2	0	0	0	0	31	0	0	0	0	0	0	33	1	0	0	0	0	55	0
Octodon_degus	103	1	0	0	0	589	1	0	0	0	0	1	0	695	1	1	0	0	0	71	0	0	0	0	0	0	0	73	768	6	0	0	0	0	67	0	0	0	0	0	0	73	7	0	0	0	0	52	0
Condylura_cristata	67	0	0	0	0	572	1	0	0	0	0	1	0	641	0	0	0	0	0	46	0	0	0	0	0	0	0	46	687	1	0	0	0	0	42	0	0	0	0	0	0	43	1	0	0	0	0	32	0
Geospiza_fortis	1	0	0	0	0	12	0	0	0	0	0	1	0	14	0	0	0	0	0	1	0	0	0	0	0	0	0	1	15	2	0	0	0	0	4	0	0	0	0	0	0	6	0	0	0	0	0	6	0
Alligator_mississippiensis	39	1	0	0	0	395	1	0	0	0	0	1	0	437	1	0	0	0	0	65	0	0	0	0	0	0	0	66	503	6	0	0	0	0	90	0	0	0	0	0	0	96	6	0	0	0	0	162	0
Chrysochloris_asiatica	108	1	0	0	0	904	1	0	0	0	0	0	0	1014	1	1	0	0	0	124	0	0	0	0	0	0	0	126	1140	2	0	0	0	0	134	0	0	0	0	0	0	136	2	0	0	0	0	123	0
Erinaceus_europaeus	121	1	0	0	0	823	1	0	0	0	0	0	0	946	8	1	0	0	0	74	0	0	0	0	0	0	0	83	1029	6	0	0	0	0	41	0	0	0	0	0	0	47	4	0	0	0	0	23	0
Orycteropus_afer_afer	97	1	0	0	0	873	0	0	0	0	0	0	0	971	15	0	0	0	0	112	0	0	0	0	0	0	0	127	1098	20	2	0	0	0	149	0	0	0	0	0	0	171	19	0	0	0	0	177	0
Bos_mutus	137	1	0	0	0	739	1	0	0	0	0	0	0	878	16	1	0	0	0	189	0	0	0	0	0	0	0	206	1084	11	0	0	0	0	50	0	0	0	0	0	0	61	74	0	0	0	0	200	0
Elephantulus_edwardii	125	1	0	0	0	766	1	0	0	0	0	0	0	893	3	2	0	0	0	53	0	0	0	0	0	0	0	58	951	5	0	0	0	0	29	0	0	0	0	0	0	34	3	0	0	0	0	24	0
Eptesicus_fuscus	109	0	0	0	0	289	1	0	0	0	0	0	0	399	3	1	0	0	0	25	0	0	0	0	0	0	0	29	428	2	0	0	0	0	21	0	0	0	0	0	0	23	5	0	0	0	0	34	0
Echinops_telfairi	134	1	0	0	0	744	1	0	0	0	0	0	0	880	11	2	0	0	0	74	0	0	0	0	0	0	0	87	967	8	0	0	0	0	135	0	0	0	0	0	0	143	9	0	0	0	0	79	0
Odobenus_rosmarus_divergens	41	0	0	0	0	346	1	0	0	0	0	0	0	388	15	1	0	0	0	82	0	0	0	0	0	0	0	98	486	1	0	0	0	0	4	0	0	0	0	0	0	5	2	0	0	0	0	10	0
Myotis_davidii	88	1	0	0	0	230	1	0	0	0	0	0	0	320	11	0	0	0	0	35	0	0	0	0	0	0	0	46	366	6	0	0	0	0	49	0	0	0	0	0	0	55	27	0	0	0	0	99	0
Pseudopodoces_humilis	4	0	0	0	0	15	0	0	0	0	0	1	0	20	0	0	0	0	0	1	0	0	0	0	0	0	0	1	21	0	0	0	0	0	4	0	0	0	0	0	0	4	0	0	0	0	0	2	0
Amazona_vittata	4	0	0	0	0	45	0	0	0	0	0	1	0	50	0	0	0	0	0	11	0	0	0	0	0	0	0	11	61	0	0	0	0	0	44	0	0	0	0	0	0	44	2	0	0	0	0	101	0
Tupaia_chinensis	184	1	0	0	0	967	1	0	0	0	0	0	0	1153	11	3	0	0	0	140	0	0	0	0	0	0	0	154	1307	6	0	0	0	0	88	0	0	0	0	0	0	94	0	0	0	0	0	50	0
Leptonychotes_weddellii	31	0	0	0	0	234	1	0	0	0	0	0	0	266	12	0	0	0	0	69	0	0	0	0	0	0	0	81	347	3	0	0	0	0	22	0	0	0	0	0	0	25	4	0	0	0	0	23	0
Zonotrichia_albicollis	1	0	0	0	0	25	0	0	0	0	0	1	0	27	0	0	0	0	0	7	0	0	0	0	0	0	0	7	34	0	0	0	0	0	21	0	0	0	0	0	0	21	0	0	0	0	0	14	0
Apalone_spinifera	315	0	0	0	0	316	1	0	0	0	0	1	0	633	44	0	0	0	0	72	0	0	0	0	0	0	0	116	749	90	0	0	0	0	82	0	0	0	0	0	0	172	449	0	0	0	0	527	0
Ara_macao	4	0	0	0	0	20	0	0	0	0	0	1	0	25	0	0	0	0	0	2	0	0	0	0	0	0	0	2	27	0	0	0	0	0	9	0	0	0	0	0	0	9	2	0	0	0	0	17	0
Pantholops_hodgsonii	89	2	0	0	0	576	1	0	0	0	0	0	0	668	13	0	0	0	0	140	0	0	0	0	0	0	0	153	821	1	0	0	0	0	32	0	0	0	0	0	0	33	1	0	0	0	0	27	0
Myotis_brandtii	119	1	0	0	0	335	1	0	0	0	0	0	0	456	9	0	0	0	0	22	0	0	0	0	0	0	0	31	487	2	0	0	0	0	27	0	0	0	0	0	0	29	7	0	0	0	0	61	0
Lipotes_vexillifer	3	0	0	0	0	14	0	0	0	0	0	0	0	17	3	0	0	0	0	13	0	0	0	0	0	0	0	16	33	0	0	0	0	0	6	0	0	0	0	0	0	6	2	0	0	0	0	3	0
Alligator_sinensis	52	1	0	0	0	572	1	0	0	0	0	1	0	627	4	0	0	0	0	103	0	0	0	0	0	0	0	107	734	4	0	0	0	0	80	0	0	0	0	0	0	84	1	0	0	0	0	33	0
Panthera_tigris_altaica	122	0	0	0	0	627	1	0	0	0	0	0	0	750	12	0	0	0	0	70	0	0	0	0	0	0	0	82	832	3	0	0	0	0	16	0	0	0	0	0	0	19	0	0	0	0	0	11	0
Eidolon_helvum	89	0	0	0	0	241	1	0	0	0	0	0	0	331	6	1	0	0	0	38	0	0	0	0	0	0	0	45	376	3	0	0	0	0	8	0	0	0	0	0	0	11	9	0	0	0	0	116	0
Pteronotus_parnellii	84	0	0	0	0	183	1	0	0	0	0	0	0	268	6	1	0	0	0	24	0	0	0	0	0	0	0	31	299	1	0	0	0	0	18	0	0	0	0	0	0	19	10	0	0	0	0	51	0
Sebastes_nigrocinctus	0	2	41	3	6	0	1	1	0	0	0	1	3	58	0	0	9	0	3	3	0	0	0	0	0	0	1	16	74	0	0	8	1	0	0	0	0	0	0	0	1	10	0	0	13	1	4	0	0
Balaenoptera_acutorostrata_scammoni	5	0	0	0	0	79	0	0	0	0	0	0	0	84	2	0	0	0	0	42	0	0	0	0	0	0	0	44	128	0	0	0	0	0	9	0	0	0	0	0	0	9	1	0	0	0	0	11	0
Anoplopoma_fimbria	0	2	56	5	12	0	1	4	0	0	0	1	4	85	0	0	10	0	6	1	0	0	0	0	0	0	0	17	102	0	0	0	0	0	0	0	0	0	0	0	0	0	0	0	8	0	3	0	0
Ophiophagus_hannah	19	0	0	0	0	316	1	0	0	0	0	1	0	337	0	1	0	0	0	44	0	0	0	0	0	0	0	45	382	2	0	0	0	0	45	0	0	0	0	0	0	47	5	0	0	0	0	53	0
Lyrurus_tetrix_tetrix	0	0	0	0	0	3	0	0	0	0	0	0	0	3	0	0	0	0	0	3	0	0	0	0	0	0	0	3	6	0	0	0	0	0	0	0	0	0	0	0	0	0	14	0	0	0	0	19	0
Nannospalax_galili	88	1	0	0	0	968	1	0	0	0	0	0	0	1058	8	0	0	0	0	161	0	0	0	0	0	0	0	169	1227	1	0	0	0	0	53	0	0	0	0	0	0	54	6	0	0	0	0	361	0
Egretta_garzetta	9	0	0	0	0	97	0	0	0	0	0	1	0	107	0	0	0	0	0	25	0	0	0	0	0	0	0	25	132	0	0	0	0	0	31	0	0	0	0	0	0	31	0	0	0	0	0	34	0
Phaethon_lepturus	9	0	0	0	0	31	0	0	0	0	0	1	0	41	2	0	0	0	0	3	0	0	0	0	0	0	0	5	46	0	0	0	0	0	1	0	0	0	0	0	0	1	1	0	0	0	0	8	0
Pelecanus_crispus	9	0	0	0	0	27	0	0	0	0	0	1	0	37	0	0	0	0	0	4	0	0	0	0	0	0	0	4	41	0	0	0	0	0	11	0	0	0	0	0	0	11	1	0	0	0	0	15	0
Cavia_aperea	59	0	0	0	0	184	1	0	0	0	0	0	0	244	22	1	0	0	0	76	0	0	0	0	0	0	0	99	343	134	0	0	0	0	639	0	0	0	0	2	0	775	65	0	0	0	0	242	0
Colius_striatus	2	0	0	0	0	11	0	0	0	0	0	1	0	14	0	0	0	0	0	5	0	0	0	0	0	0	0	5	19	0	0	0	0	0	2	0	0	0	0	0	0	2	1	0	0	0	0	2	0
Stegastes_partitus	0	3	30	3	15	0	1	1	0	0	0	1	4	58	0	0	5	0	0	0	0	0	0	0	0	0	0	5	63	0	0	6	0	2	0	0	0	0	0	0	2	10	0	0	5	0	1	0	0
Eurypyga_helias	7	0	0	0	0	21	0	0	0	0	0	1	0	29	0	0	0	0	0	5	0	0	0	0	0	0	0	5	34	0	0	0	0	0	6	0	0	0	0	0	0	6	0	0	0	0	0	22	0
Fulmarus_glacialis	7	0	0	0	0	24	0	0	0	0	0	1	0	32	3	0	0	0	0	6	0	0	0	0	0	0	0	9	41	0	0	0	0	0	7	0	0	0	0	0	0	7	0	0	0	0	0	26	0
Gavia_stellata	8	0	0	0	0	36	0	0	0	0	0	1	0	45	1	0	0	0	0	6	0	0	0	0	0	0	0	7	52	1	0	0	0	0	10	0	0	0	0	0	0	11	2	1	0	0	0	30	0
Haliaeetus_albicilla	8	0	0	0	0	28	0	0	0	0	0	1	0	37	2	0	0	0	0	5	0	0	0	0	0	0	0	7	44	0	0	0	0	0	3	0	0	0	0	0	0	3	0	0	0	0	0	13	1
Leptosomus_discolor	11	0	0	0	0	18	0	0	0	0	0	0	0	29	0	0	0	0	0	5	0	0	0	0	0	1	0	6	35	0	0	0	0	0	5	0	0	0	0	0	0	5	0	0	0	0	0	17	0
Corvus_brachyrhynchos	6	0	0	0	0	12	0	0	0	0	0	1	0	19	0	0	0	0	0	4	0	0	0	0	0	0	0	4	23	1	0	0	0	0	4	0	0	0	0	0	0	5	0	0	0	0	0	5	0
Opisthocomus_hoazin	12	0	0	0	0	46	0	0	0	0	0	1	0	59	0	0	0	0	0	23	0	0	0	0	0	0	0	23	82	0	0	0	0	0	25	0	0	0	0	0	0	25	0	0	0	0	0	32	0
Chlamydotis_macqueenii	10	0	0	0	0	27	0	0	0	0	0	1	0	38	1	1	0	0	0	5	0	0	0	0	0	0	0	7	45	1	0	0	0	0	8	0	0	0	0	0	0	9	0	0	0	0	0	29	0
Mesitornis_unicolor	2	0	0	0	0	15	0	0	0	0	0	1	0	18	1	0	0	0	0	7	0	0	0	0	0	0	0	8	26	1	0	0	0	0	5	0	0	0	0	0	0	6	0	0	0	0	0	33	0
Galeopterus_variegatus	115	0	0	0	0	515	1	0	0	0	0	2	0	633	13	2	0	0	0	110	0	0	0	0	0	0	0	125	758	28	0	0	0	0	242	0	0	0	0	0	0	270	25	0	0	0	0	316	0
Equus_przewalskii	115	1	0	0	0	729	1	0	0	0	0	0	0	846	18	1	0	0	0	183	0	0	0	0	0	0	0	202	1048	3	0	0	0	0	21	0	0	0	0	0	0	24	2	0	0	0	0	165	0
Nestor_notabilis	6	0	0	0	0	24	0	0	0	0	0	1	0	31	0	0	0	0	0	4	0	0	0	0	0	0	0	4	35	0	0	0	0	0	1	0	0	0	0	0	0	1	0	0	0	0	0	11	0
Pampus_argenteus	0	0	1	0	4	0	0	0	0	0	0	0	0	5	0	1	1	0	0	0	0	0	0	0	0	0	0	2	7	0	0	22	2	11	0	0	0	0	0	1	8	44	0	0	14	2	8	0	1
Struthio_camelus_australis	22	0	0	0	0	37	0	0	0	0	0	1	0	60	2	1	0	0	0	6	0	0	0	0	0	0	0	9	69	0	0	0	0	0	5	0	0	0	0	0	0	5	0	0	0	0	0	4	0
Pygoscelis_adeliae	5	0	0	0	0	20	0	0	0	0	0	1	0	26	5	0	0	0	0	9	0	0	0	0	0	0	0	14	40	0	0	0	0	0	2	0	0	0	0	0	0	2	1	0	0	0	0	8	0
Aptenodytes_forsteri	6	0	0	0	0	25	0	0	0	0	0	1	0	32	6	0	0	0	0	10	0	0	0	0	0	0	0	16	48	0	0	0	0	0	4	0	0	0	0	0	0	4	0	0	0	0	0	12	0
Podiceps_cristatus	11	0	0	0	0	37	0	0	0	0	0	1	0	49	0	0	0	0	0	6	0	0	0	0	0	0	0	6	55	0	0	0	0	0	10	0	0	0	0	0	0	10	0	0	0	0	0	61	0
Cathartes_aura	10	0	0	0	0	38	0	0	0	0	0	1	0	49	2	0	0	0	0	7	0	0	0	0	0	0	0	9	58	0	0	0	0	0	12	0	0	0	0	0	0	12	3	0	0	0	0	39	0
Antrostomus_carolinensis	11	0	0	0	0	40	0	0	0	0	0	1	0	52	0	0	0	0	0	2	0	0	0	0	0	0	0	2	54	1	0	0	0	0	9	0	0	0	0	0	0	10	0	0	0	0	0	25	0
Apaloderma_vittatum	7	0	0	0	0	25	0	0	0	0	0	1	0	33	1	0	0	0	0	11	0	0	0	0	0	0	0	12	45	1	0	0	0	0	16	0	0	0	0	0	0	17	2	0	0	0	0	57	0
Tinamus_guttatus	14	0	0	0	0	44	0	0	0	0	0	1	0	59	1	0	0	0	0	14	0	0	0	0	0	0	0	15	74	4	0	0	0	0	6	0	0	0	0	0	0	10	10	0	0	0	0	36	0
Charadrius_vociferus	11	0	0	0	0	57	0	0	0	0	0	1	0	69	2	0	0	0	0	11	0	0	0	0	0	0	0	13	82	0	0	0	0	0	5	0	0	0	0	0	0	5	0	0	0	0	0	18	0
Nipponia_nippon	9	0	0	0	0	32	0	0	0	0	0	1	0	42	1	0	0	0	0	11	0	0	0	0	0	0	0	12	54	0	0	0	0	0	6	0	0	0	0	0	0	6	1	0	0	0	0	14	0
Phalacrocorax_carbo	2	0	0	0	0	19	0	0	0	0	0	1	0	22	2	0	0	0	0	5	0	0	0	0	0	0	0	7	29	1	0	0	0	0	1	0	0	0	0	0	0	2	0	0	0	0	0	5	0
Buceros_rhinoceros_silvestris	4	0	0	0	0	8	0	0	0	0	0	1	0	13	0	0	0	0	0	2	0	0	0	0	0	0	0	2	15	2	0	0	0	0	5	0	0	0	0	0	0	7	1	0	0	0	0	12	0
Notothenia_coriiceps	0	1	15	1	4	0	1	0	0	0	0	1	1	24	0	0	7	0	1	1	0	0	0	0	0	0	0	9	33	0	0	1	0	0	0	0	0	0	0	0	0	1	0	0	4	0	1	0	0
Crotalus_pyrrhus	19	0	0	0	0	218	1	0	0	0	0	1	0	239	3	0	0	0	0	54	0	0	0	0	0	0	0	57	296	0	0	0	0	0	17	0	0	0	0	0	0	17	11	3	0	0	0	249	0
Haliaeetus_leucocephalus	11	0	0	0	0	43	0	0	0	0	0	1	0	55	0	0	0	0	0	3	0	0	0	0	0	0	0	3	58	0	0	0	0	0	11	0	0	0	0	0	0	11	0	0	0	0	0	9	1
Chaetura_pelagica	4	0	0	0	0	26	0	0	0	0	0	1	0	31	1	0	0	0	0	1	0	0	0	0	0	0	0	2	33	1	0	0	0	0	9	0	0	0	0	0	0	10	2	0	0	0	0	13	0
Cervus_capreolus	67	1	0	0	0	328	1	0	0	0	0	0	0	397	9	1	0	0	0	79	0	0	0	0	0	0	0	89	486	34	0	0	0	0	238	0	0	0	0	0	0	272	70	0	0	0	0	398	0
Bison_bison_bison	113	1	0	0	0	732	1	0	0	0	0	0	0	847	25	1	0	0	0	141	0	0	0	0	0	0	0	167	1014	30	0	0	0	0	128	0	0	0	0	0	0	158	143	0	0	0	0	593	0
Ovis_aries_musimon	108	2	0	0	0	667	1	0	0	0	0	0	0	778	15	0	0	0	0	112	0	0	0	0	0	0	0	127	905	8	0	0	0	0	47	0	0	0	0	0	0	55	6	0	0	0	0	45	0
Aquila_chrysaetos_canadensis	12	0	0	0	0	42	0	0	0	0	0	1	0	55	1	0	0	0	0	9	0	0	0	0	0	0	0	10	65	0	0	0	0	0	8	0	0	0	0	0	0	8	0	0	0	0	0	11	0
Vicugna_pacos_huacaya	76	2	0	0	0	519	1	0	0	0	0	0	0	598	7	0	0	0	0	81	0	0	0	0	0	0	0	88	686	0	0	0	0	0	3	0	0	0	0	0	0	3	5	0	0	0	0	180	0
Camelus_bactrianus	76	0	0	0	0	498	1	0	0	0	0	0	0	575	14	0	0	0	0	82	0	0	0	0	0	0	0	96	671	1	0	0	0	0	12	0	0	0	0	0	0	13	1	0	0	0	0	140	0
Cyprinodon_nevadensis_pectoralis	0	0	21	3	6	0	0	0	0	0	0	1	6	37	0	0	0	0	1	0	0	0	0	0	0	0	1	2	39	0	4	31	1	12	1	0	0	0	0	0	3	52	0	0	21	0	7	0	1
Periophthalmodon_schlosseri	0	2	51	3	21	0	1	0	0	0	0	1	5	84	0	0	8	0	12	0	0	0	0	0	0	0	4	24	108	0	0	3	0	2	0	0	1	0	0	0	0	6	0	0	17	2	8	0	0
Scartelaos_histophorus	0	1	51	2	13	0	1	0	0	0	0	1	5	74	0	0	8	0	4	0	0	0	0	0	0	0	4	16	90	0	0	5	0	3	0	0	0	0	0	0	0	8	0	2	28	5	7	0	0
Pseudopleuronectes_yokohamae	0	1	6	1	0	0	0	0	0	0	0	1	2	11	0	0	4	2	0	0	0	1	0	0	0	0	1	8	19	0	0	0	0	0	0	0	0	0	0	0	0	0	0	3	73	2	32	0	4
Boleophthalmus_pectinirostris	0	3	88	6	27	0	1	0	0	0	0	1	6	132	0	0	9	0	14	0	0	0	0	0	0	0	5	28	160	0	0	11	0	5	0	0	0	0	0	0	0	16	0	0	5	0	5	0	0
Vipera_berus_berus	18	0	0	0	0	329	1	0	0	0	0	1	0	349	1	1	0	0	0	50	0	0	0	0	0	0	0	52	401	0	0	0	0	0	47	0	0	0	0	0	0	47	0	0	0	0	0	39	0
Colobus_angolensis_palliatus	18	0	0	0	0	181	0	0	0	0	0	0	0	199	8	0	0	0	0	31	1	0	0	0	0	0	0	40	239	0	0	0	0	0	6	0	0	0	0	0	0	6	6	0	0	0	0	19	0
Mandrillus_leucophaeus	51	0	0	0	0	321	1	0	0	0	0	1	0	374	8	0	0	0	0	33	0	0	0	0	0	0	0	41	415	2	0	0	0	0	18	0	0	0	0	0	0	20	2	0	0	0	0	20	0
Aotus_nancymaae	84	1	0	0	0	313	0	0	0	0	0	1	0	399	4	0	0	0	0	39	0	0	0	0	0	0	0	43	442	4	0	0	0	0	12	0	0	0	0	0	0	16	6	0	0	0	0	3	0
Cercocebus_atys	48	0	0	0	0	326	1	0	0	0	0	1	0	376	7	0	0	0	0	33	0	0	0	0	0	0	0	40	416	0	0	0	0	0	3	0	0	0	0	0	0	3	0	0	0	0	0	4	0
Macaca_nemestrina	39	0	0	0	0	320	0	0	0	0	0	1	0	360	9	0	0	0	0	41	0	0	0	0	0	0	0	50	410	1	0	0	0	0	3	0	0	0	0	0	0	4	1	0	0	0	0	14	0
Propithecus_coquereli	137	1	0	0	0	456	1	0	0	0	0	0	0	595	9	1	0	0	0	62	0	0	0	0	0	1	0	73	668	4	0	0	0	0	43	0	0	0	0	0	0	47	5	0	0	0	0	45	0
Anser_cygnoides_domesticus	12	0	0	0	0	69	0	0	0	0	0	1	0	82	0	0	0	0	0	5	0	0	0	0	0	0	0	5	87	1	0	0	0	0	26	0	0	0	0	0	0	27	0	0	0	0	0	26	0
Balaenoptera_bonaerensis	5	0	0	0	0	66	0	0	0	0	0	0	0	71	2	0	0	0	0	33	0	0	0	0	0	0	0	35	106	0	0	0	0	0	6	0	0	0	0	0	0	6	0	0	0	0	0	35	0
Apteryx_mantelli_mantelli	16	1	0	0	0	45	0	0	0	0	0	1	0	63	2	0	0	0	0	9	0	0	0	0	0	0	0	11	74	2	0	0	0	0	29	0	0	0	0	0	0	31	16	0	0	0	0	45	0
Thamnophis_sirtalis	12	0	0	0	0	264	1	0	0	0	0	1	0	278	5	1	0	0	0	48	0	0	0	0	0	0	0	54	332	3	0	0	0	0	42	0	0	0	0	0	0	45	1	1	0	0	0	27	0
Pantherophis_guttatus	27	0	0	0	0	425	1	0	0	0	0	1	0	454	6	0	0	0	0	52	0	0	0	0	0	0	0	58	512	0	1	0	0	0	11	0	0	0	0	0	0	12	4	2	0	0	0	37	0
Eulemur_macaco	124	1	0	0	0	468	1	0	0	0	0	1	0	595	5	1	0	0	0	39	0	0	0	0	0	0	0	45	640	14	0	0	0	0	82	0	0	0	0	0	0	96	5	0	0	0	0	60	0
Eulemur_flavifrons	123	1	0	0	0	476	1	0	0	0	0	1	0	602	4	1	0	0	0	30	0	0	0	0	0	0	0	35	637	1	0	0	0	0	42	0	0	0	0	0	0	43	14	0	0	0	0	130	0
Austrofundulus_limnaeus	0	4	29	13	21	1	1	1	0	0	0	1	14	85	0	0	6	1	2	0	0	0	0	0	0	0	4	13	98	0	0	9	2	3	0	0	0	0	0	0	2	16	0	0	12	0	0	0	0
Zosterops_lateralis_melanops	2	0	0	0	0	19	0	0	0	0	0	1	0	22	0	0	0	0	0	9	0	0	0	0	0	0	0	9	31	1	0	0	0	0	16	0	0	0	0	0	0	17	1	0	0	0	0	15	0
Apodemus_sylvaticus	52	1	0	0	0	178	0	0	0	0	0	0	0	231	5	0	0	0	0	30	0	0	0	0	0	0	0	35	266	37	1	0	0	0	467	1	0	0	0	0	0	506	46	0	0	0	0	375	1
Calidris_pugnax	13	0	0	0	0	75	0	0	0	0	0	1	0	89	0	0	0	0	0	10	0	0	0	0	0	0	0	10	99	0	0	0	0	0	7	0	0	0	0	0	0	7	0	0	0	0	0	7	0
Poecilia_latipinna	0	6	64	6	26	0	1	1	0	0	0	1	7	112	0	0	4	0	5	0	0	1	0	0	0	0	1	11	123	0	0	4	0	4	0	0	1	0	0	0	1	10	0	0	3	1	9	0	0
Poecilia_mexicana	0	6	63	5	29	0	1	1	0	0	0	1	6	112	0	0	3	0	6	0	0	1	0	0	0	0	1	11	123	0	0	6	1	4	0	0	0	0	0	0	2	13	0	0	7	0	4	0	0
Gekko_japonicus	41	2	0	0	0	488	0	0	0	0	0	1	0	532	8	1	0	0	0	52	0	0	0	0	0	0	0	61	593	1	0	0	0	0	19	0	0	0	0	0	0	20	13	1	0	0	0	105	0
Cottus_rhenanus	0	0	8	2	4	0	1	0	0	0	0	1	0	16	0	0	2	0	0	1	0	0	0	0	0	0	0	3	19	0	1	11	0	1	0	0	0	0	0	0	4	17	0	0	22	2	3	0	0
Marmota_marmota_marmota	125	2	0	0	0	866	1	0	0	0	0	1	0	995	8	0	0	0	0	141	0	0	0	0	0	0	0	149	1144	2	0	0	0	0	19	0	0	0	0	0	0	21	5	0	0	0	0	29	0
Sinocyclocheilus_anshuiensis	0	7	43	8	17	1	2	1	0	0	0	4	15	98	0	2	3	1	4	0	2	0	0	0	0	0	13	25	123	0	0	0	1	0	0	0	0	0	0	0	0	1	0	0	11	5	6	0	1
Sinocyclocheilus_rhinocerous	0	6	42	11	20	1	2	1	0	0	0	4	12	99	0	0	10	0	1	0	2	0	0	0	0	0	11	24	123	0	1	0	0	0	0	0	0	0	0	0	3	4	0	8	16	8	7	0	1
Sinocyclocheilus_grahami	0	8	49	9	20	1	2	1	0	0	0	4	16	110	0	0	1	0	2	0	2	0	0	0	0	0	13	18	128	0	1	0	1	2	0	0	0	0	0	0	6	10	0	0	5	2	2	0	1
Protobothrops_mucrosquamatus	38	1	0	0	0	490	1	0	0	0	0	1	0	531	5	0	0	0	0	68	0	0	0	0	0	0	0	73	604	1	0	0	0	0	39	0	0	0	0	0	0	40	2	0	0	0	0	37	0
Miichthys_miiuy	0	2	50	3	30	1	1	0	0	0	0	1	5	93	0	0	16	0	4	0	0	0	0	0	0	0	0	20	113	0	0	2	0	5	0	0	0	0	0	0	0	7	0	0	1	0	3	0	0
Miniopterus_natalensis	95	0	0	0	0	235	1	0	0	0	0	0	0	331	3	1	0	0	0	25	0	0	0	0	0	0	0	29	360	3	0	0	0	0	27	0	0	0	0	0	0	30	1	0	0	0	0	3	0
Lepidothrix_coronata	4	0	0	0	0	11	0	0	0	0	0	1	0	16	0	0	0	0	0	5	0	0	0	0	0	0	0	5	21	0	0	0	0	0	3	0	0	0	0	0	0	3	0	0	0	0	0	7	0
Cebus_imitator	86	1	0	0	0	303	0	0	0	0	0	1	0	391	10	0	0	0	0	49	0	0	0	0	0	0	0	59	450	0	0	0	0	0	7	0	0	0	0	0	0	7	0	0	0	0	0	12	0
Crotalus_horridus	16	0	0	0	0	328	1	0	0	0	0	1	0	346	1	0	0	0	0	55	0	0	0	0	0	0	0	56	402	7	0	0	0	0	32	0	0	0	0	0	0	39	5	1	0	0	0	90	0
Lates_calcarifer	0	13	145	7	60	0	1	1	0	0	0	1	17	245	0	1	14	0	7	1	0	0	0	0	0	0	6	29	274	0	0	0	0	0	0	0	0	0	0	0	0	0	0	0	3	0	1	0	0
Phylloscopus_trochiloides_viridanus	3	0	0	0	0	10	0	0	0	0	0	1	0	14	0	0	0	0	0	4	0	0	0	0	0	0	0	4	18	0	0	0	0	0	1	0	0	0	0	0	0	1	2	0	0	0	0	4	0
Phylloscopus_plumbeitarsus	4	0	0	0	0	8	0	0	0	0	0	1	0	13	0	0	0	0	0	3	0	0	0	0	0	0	0	3	16	0	0	0	0	0	0	0	0	0	0	0	0	0	0	0	0	0	0	11	0
Phylloscopus_trochiloides_trochiloides	4	0	0	0	0	7	0	0	0	0	0	1	0	12	0	0	0	0	0	1	0	0	0	0	0	0	0	1	13	0	0	0	0	0	2	0	0	0	0	0	0	2	0	0	0	0	0	13	0
Neotoma_lepida	21	0	0	0	0	163	1	0	0	0	0	0	0	185	2	0	0	0	0	30	0	0	0	0	0	0	0	32	217	89	3	0	0	0	636	0	0	0	0	0	0	728	9	0	0	0	0	80	0
Ellobius_lutescens	38	0	0	0	0	415	0	0	0	0	0	0	0	453	10	0	0	0	0	79	0	0	0	0	0	0	0	89	542	12	0	0	0	0	218	0	0	0	0	0	0	230	7	0	0	0	0	205	0
Ellobius_talpinus	35	0	0	0	0	383	0	0	0	0	0	0	0	418	13	1	0	0	0	66	0	0	0	0	0	0	0	80	498	12	0	0	0	0	125	0	0	0	0	0	0	137	11	0	0	0	0	266	0
Rhinopithecus_bieti	31	0	0	0	0	172	0	0	0	0	0	0	0	203	9	0	0	0	0	44	1	0	0	0	0	0	0	54	257	1	0	0	0	0	7	0	0	0	0	0	0	8	11	0	0	0	0	32	0
Mola_mola	0	0	10	1	5	0	1	0	0	0	0	1	1	19	0	0	0	0	1	0	0	0	0	0	0	0	0	1	20	0	0	1	0	1	0	0	0	0	0	0	0	2	0	0	0	0	0	0	0
Manacus_vitellinus	2	0	0	0	0	112	0	0	0	0	0	1	0	115	0	0	0	0	0	20	0	0	0	0	0	0	0	20	135	2	0	0	0	0	8	0	0	0	0	0	0	10	0	0	0	0	0	29	0
Crocodylus_porosus	4	0	0	0	0	6	1	0	0	0	0	1	0	12	0	0	0	0	0	1	0	0	0	0	0	0	0	1	13	0	0	0	0	0	0	0	0	0	0	0	0	0	0	0	0	0	0	0	0
Gavialis_gangeticus	0	1	0	0	0	26	1	0	0	0	0	1	0	29	0	0	0	0	0	2	0	0	0	0	0	0	0	2	31	0	0	0	0	0	3	0	0	0	0	0	0	3	0	0	0	0	0	2	0
Malaclemys_terrapin_terrapin	293	1	0	0	0	375	1	0	0	0	0	1	0	671	1	0	0	0	0	4	0	0	0	0	0	0	0	5	676	0	0	0	0	0	0	0	0	0	0	0	0	0	17	0	0	0	0	21	0
Panthera_pardus	144	0	0	0	0	678	1	0	0	0	0	0	0	823	17	1	0	0	0	57	0	0	0	0	0	0	0	75	898	7	0	0	0	0	26	0	0	0	0	0	0	33	30	0	0	0	0	93	0
Tympanuchus_cupido_pinnatus	6	0	0	0	0	19	0	0	0	0	0	1	0	26	0	0	0	0	0	0	0	0	0	0	0	0	0	0	26	1	0	0	0	0	3	0	0	0	0	0	0	4	2	0	0	0	0	11	0
Rhinolophus_sinicus	74	1	0	0	0	174	0	0	0	0	0	0	0	249	0	0	0	0	0	14	0	0	0	0	0	0	0	14	263	5	0	0	0	0	57	0	0	0	0	0	0	62	0	0	0	0	0	63	0
Hipposideros_armiger	76	0	0	0	0	207	0	0	0	0	0	0	0	283	8	1	0	0	0	27	0	0	0	0	0	0	0	36	319	7	0	0	0	0	58	0	0	0	0	0	0	65	3	0	0	0	0	18	0
Hippocampus_comes	0	1	16	1	6	0	0	0	0	0	0	1	0	25	0	0	2	0	0	0	0	0	0	0	0	0	1	3	28	0	0	1	0	2	0	0	0	0	0	0	0	3	0	0	1	0	2	0	0
Monopterus_albus	0	1	80	1	4	4	1	0	0	0	0	1	37	129	0	0	16	0	2	5	0	0	0	0	0	0	26	49	178	0	0	8	1	1	1	0	0	0	0	0	9	20	0	0	31	3	2	3	0
Castor_canadensis	62	0	0	0	0	578	0	0	0	0	0	1	0	641	15	0	0	0	0	235	0	0	0	0	0	0	0	250	891	0	0	0	0	0	0	0	0	0	0	0	0	0	1	0	0	0	0	15	0
Ciconia_boyciana	9	0	0	0	0	28	0	0	0	0	0	0	0	37	3	0	0	0	0	11	0	0	0	0	0	0	0	14	51	0	0	0	0	0	0	0	0	0	0	0	0	0	4	0	0	0	0	147	0
Grus_japonensis	7	0	0	0	0	45	0	0	0	0	0	1	0	53	2	0	0	0	0	6	0	0	0	0	0	0	0	8	61	1	0	0	0	0	1	0	0	0	0	0	0	2	13	0	0	0	0	38	0
Hypotaenidia_okinawae	6	0	0	0	0	37	0	0	0	0	0	1	0	44	1	0	0	0	0	5	0	0	0	0	0	0	0	6	50	0	0	0	0	0	0	0	0	0	0	0	0	0	8	0	0	0	0	30	0
Ailurus_styani	141	1	0	0	0	637	1	0	0	0	0	0	0	780	8	1	0	0	0	76	0	0	0	0	0	0	0	85	865	9	0	0	0	0	37	0	0	0	0	0	0	46	5	0	0	0	0	10	0
Patagioenas_fasciata_monilis	10	0	0	0	0	28	0	0	0	0	0	1	0	39	1	0	0	0	0	3	0	0	0	0	0	0	0	4	43	1	0	0	0	0	18	0	0	0	0	0	0	19	1	0	0	0	0	22	0
Phascolarctos_cinereus	138	1	0	0	0	485	0	0	0	0	0	2	0	626	24	2	0	0	0	111	0	0	0	0	0	0	0	137	763	0	0	0	0	0	0	0	0	0	0	0	0	0	0	0	0	0	0	1	0
Odocoileus_virginianus_texanus	134	1	0	0	0	762	1	0	0	0	0	0	0	898	17	1	0	0	0	107	0	0	0	0	0	0	0	125	1023	4	0	0	0	0	51	0	0	0	0	0	0	55	2	0	0	0	0	33	0
Maccullochella_peelii	0	3	27	4	12	0	1	1	0	0	0	1	5	54	0	0	4	0	0	0	0	0	0	0	0	0	0	4	58	0	0	12	0	1	0	0	0	0	0	0	0	13	0	0	13	0	3	0	0
Anser_cygnoides	13	0	0	0	0	53	0	0	0	0	0	1	0	67	0	0	0	0	0	12	0	0	0	0	0	0	0	12	79	0	0	0	0	0	49	0	0	0	0	0	0	49	0	0	0	0	0	36	0
Sporophila_hypoxantha	2	0	0	0	0	20	0	0	0	0	0	1	0	23	0	0	0	0	0	8	0	0	0	0	0	0	0	8	31	1	0	0	0	0	0	0	0	0	0	0	0	1	0	0	0	0	0	3	0
Phalacrocorax_pelagicus	6	0	0	0	0	25	0	0	0	0	0	1	0	32	0	0	0	0	0	4	0	0	0	0	0	0	0	4	36	0	0	0	0	0	2	0	0	0	0	0	0	2	2	0	0	0	0	1	0
Phalacrocorax_auritus	4	0	0	0	0	24	0	0	0	0	0	1	0	29	0	0	0	0	0	2	0	0	0	0	0	0	0	2	31	0	0	0	0	0	6	0	0	0	0	0	0	6	2	0	0	0	0	1	0
Phalacrocorax_harrisi	5	0	0	0	0	22	0	0	0	0	0	1	0	28	1	0	0	0	0	6	0	0	0	0	0	0	0	7	35	0	0	0	0	0	4	0	0	0	0	0	0	4	1	0	0	0	0	0	0
Phalacrocorax_brasilianus	3	0	0	0	0	22	0	0	0	0	0	1	0	26	0	0	0	0	0	4	0	0	0	0	0	0	0	4	30	2	0	0	0	0	4	0	0	0	0	0	0	6	6	0	0	0	0	11	0
Eschrichtius_robustus	3	0	0	0	0	68	0	0	0	0	0	0	0	71	4	0	0	0	0	44	0	0	0	0	0	0	0	48	119	0	0	0	0	0	17	0	0	0	0	0	0	17	3	0	0	0	0	16	0
Ammotragus_lervia	117	1	0	0	0	707	1	0	0	0	0	0	0	826	12	1	0	0	0	119	0	0	0	0	0	0	0	132	958	2	0	0	0	0	24	0	0	0	0	0	0	26	8	0	0	0	0	62	0
Meriones_unguiculatus	61	0	0	0	0	521	0	0	0	0	0	0	0	582	11	1	0	0	0	46	0	0	0	0	0	0	0	58	640	10	0	0	0	0	71	0	0	0	0	0	0	81	13	0	0	0	0	122	0
Seriola_quinqueradiata	0	5	67	8	51	0	1	2	0	0	0	1	13	148	0	0	5	0	9	1	0	0	0	0	0	0	0	15	163	0	0	0	0	0	0	0	0	0	0	0	0	0	0	0	0	0	0	0	0
Callipepla_squamata	21	0	0	0	0	25	0	0	0	0	0	1	0	47	1	0	0	0	0	19	0	0	0	0	0	0	0	20	67	1	0	0	0	0	19	0	0	0	0	0	0	20	17	0	0	0	0	76	0
Anas_zonorhyncha	13	0	0	0	0	176	0	0	0	0	0	1	0	190	1	0	0	0	0	29	0	0	0	0	0	0	0	30	220	2	0	0	0	0	89	0	0	0	0	0	0	91	0	0	0	0	0	43	0
Seriola_dumerili	0	4	70	7	46	0	1	2	0	0	0	1	11	142	0	0	7	1	9	1	0	0	0	0	0	0	4	22	164	0	0	2	0	1	0	0	0	0	0	0	0	3	0	0	19	0	13	0	0
Lithobates_catesbeianus	42	14	48	21	30	823	0	0	0	0	0	2	0	980	3	1	6	5	0	164	0	0	0	0	0	0	0	179	1159	3	0	1	0	0	19	0	0	0	0	0	0	23	23	3	7	8	7	166	0
Enhydra_lutris_kenyoni	88	0	0	0	0	479	1	0	0	0	0	0	0	568	18	0	0	0	0	101	0	0	0	0	0	0	0	119	687	2	0	0	0	0	19	0	0	0	0	0	0	21	0	0	0	0	0	53	0
Delphinapterus_leucas	3	0	0	0	0	15	0	0	0	0	0	0	0	18	2	0	0	0	0	20	0	0	0	0	0	0	0	22	40	0	0	0	0	0	0	0	0	0	0	0	0	0	0	0	0	0	0	1	0
Uria_lomvia	8	0	0	0	0	48	0	0	0	0	0	1	0	57	2	0	0	0	0	5	0	0	0	0	0	0	0	7	64	0	0	0	0	0	3	0	0	0	0	0	0	3	2	0	0	0	0	8	0
Phylloscopus_trochilus_acredula	2	0	0	0	0	12	0	0	0	0	0	1	0	15	1	0	0	0	0	4	0	0	0	0	0	0	0	5	20	0	0	0	0	0	6	0	0	0	0	0	0	6	0	0	0	0	0	5	0
Apodemus_speciosus	79	1	0	0	0	684	1	0	0	0	0	0	0	765	13	0	0	0	0	130	0	0	0	0	0	0	0	143	908	16	0	0	0	0	98	0	0	0	0	0	0	114	26	2	0	0	0	236	0
Strix_occidentalis_caurina	12	0	0	0	0	80	0	0	0	0	0	1	0	93	1	0	0	0	0	10	0	0	0	0	0	0	0	11	104	0	0	0	0	0	0	0	0	0	0	0	0	0	0	0	0	0	0	22	0
Spermophilus_dauricus	137	1	0	0	0	953	0	0	0	0	0	1	0	1092	17	1	0	0	0	208	0	0	0	0	0	0	0	226	1318	5	0	0	0	0	44	1	0	0	0	0	0	50	29	0	0	0	0	357	1
Tympanoctomys_barrerae	55	1	0	0	0	294	1	0	0	0	0	1	0	352	3	1	0	0	0	81	0	0	0	0	0	0	0	85	437	6	0	0	0	0	30	0	0	0	0	0	0	36	54	0	0	0	0	422	0
Octomys_mimax	68	1	0	0	0	366	0	0	0	0	0	1	0	436	6	1	0	0	0	85	0	0	0	0	0	0	0	92	528	1	0	0	0	0	17	0	0	0	0	0	0	18	54	0	0	0	0	390	2
Anser_brachyrhynchus	13	0	0	0	0	86	0	0	0	0	0	1	0	100	0	0	0	0	0	10	0	0	0	0	0	0	0	10	110	1	0	0	0	0	17	0	0	0	0	0	0	18	0	0	0	0	0	28	0
Micropterus_floridanus	0	7	85	8	20	0	1	1	0	0	0	1	12	135	0	0	26	0	2	2	0	0	0	0	0	0	5	35	170	0	0	0	0	0	0	0	0	0	0	0	0	0	0	1	99	3	22	1	2
Agapornis_roseicollis	4	0	0	0	0	20	0	0	0	0	0	1	0	25	0	0	0	0	0	3	0	0	0	0	0	0	0	3	28	0	0	0	0	0	3	0	0	0	0	0	0	3	0	0	0	0	0	12	0
Seriola_lalandi_dorsalis	0	4	64	6	35	0	1	2	0	0	0	1	6	119	0	0	10	0	7	1	0	0	0	0	0	0	0	18	137	0	0	3	1	13	0	0	0	0	0	0	1	18	0	8	43	1	34	0	0
Symphodus_melops	0	6	51	4	13	0	1	0	0	0	0	1	2	78	0	0	7	0	11	1	0	1	0	0	0	0	1	21	99	0	0	0	0	0	0	0	0	0	0	0	0	0	0	0	1	0	0	0	0
Limosa_lapponica_baueri	7	0	0	0	0	37	0	0	0	0	0	1	0	45	0	0	0	0	0	9	0	0	0	0	0	0	0	9	54	0	0	0	0	0	10	0	0	0	0	0	0	10	3	0	0	0	0	15	0
Dicerorhinus_sumatrensis_sumatrensis	147	1	0	0	0	1014	1	0	0	0	0	0	0	1163	28	1	0	0	0	258	0	0	0	0	0	0	0	287	1450	5	0	0	0	0	62	0	0	0	0	0	0	67	28	0	0	0	0	1058	0
Acridotheres_javanicus	2	0	0	0	0	18	0	0	0	0	0	1	0	21	0	0	0	0	0	7	0	0	0	0	0	0	0	7	28	1	0	0	0	0	6	0	0	0	0	0	0	7	0	0	0	0	0	15	0
Psittacula_krameri	4	0	0	0	0	38	0	0	0	0	0	1	0	43	0	0	0	0	0	3	0	0	0	0	0	0	0	3	46	0	0	0	0	0	20	0	0	0	0	0	0	20	4	0	0	0	0	44	0
Paramormyrops_kingsleyae	0	4	22	7	12	0	2	0	0	0	0	2	9	58	0	0	3	0	0	0	1	0	0	0	0	0	3	7	65	0	1	8	0	0	0	0	0	0	0	0	3	12	0	0	6	0	1	0	0
Coryphaenoides_rupestris	0	1	48	1	16	1	0	0	0	0	0	4	6	77	0	0	9	0	8	0	0	0	0	0	0	0	3	20	97	0	0	0	0	0	0	0	0	0	0	0	0	0	0	0	4	0	1	0	0
Gopherus_agassizii	120	0	0	0	0	434	1	0	0	0	0	1	0	556	20	1	0	0	0	161	0	0	0	0	0	0	0	182	738	76	1	0	0	0	210	0	0	0	0	0	0	287	73	0	0	0	0	186	0
Pagrus_major	0	1	17	4	4	0	1	0	0	0	0	1	2	30	0	0	2	0	1	0	0	2	0	0	0	0	0	5	35	0	1	32	0	8	0	0	0	0	0	0	4	45	0	2	84	0	24	0	0
Solenodon_paradoxus_woodi	111	1	0	0	0	570	1	0	0	0	0	1	0	684	13	1	0	0	0	109	0	0	0	0	0	0	0	123	807	7	0	0	0	0	104	0	0	0	0	0	0	111	24	0	0	0	0	265	0
Cyanistes_caeruleus	4	0	0	0	0	37	0	0	0	0	0	1	0	42	2	0	0	0	0	13	0	0	0	0	0	0	0	15	57	0	0	0	0	0	2	0	0	0	0	0	0	2	0	0	0	0	0	23	0
Bambusicola_thoracicus	7	0	0	0	0	26	0	0	0	0	0	1	0	34	2	0	0	0	0	19	0	0	0	0	0	0	0	21	55	1	0	0	0	0	2	0	0	0	0	0	0	3	4	0	0	0	0	249	0
Terrapene_carolina_triunguis	282	0	0	0	0	512	1	0	0	0	0	1	0	796	34	1	0	0	0	110	0	0	0	0	0	0	0	145	941	6	0	0	0	0	24	0	0	0	0	0	0	30	48	0	0	0	0	191	0
Seriola_rivoliana	0	0	75	7	54	0	1	2	0	0	0	1	10	150	0	0	5	0	7	1	0	0	0	0	0	0	2	15	165	0	0	0	0	0	0	0	0	0	0	0	0	0	0	0	0	0	0	0	0
Hyaena_hyaena	116	0	0	0	0	656	1	0	0	0	0	0	0	773	9	1	0	0	0	51	0	0	0	0	0	0	0	61	834	2	0	0	0	0	7	0	0	0	0	0	0	9	19	0	0	0	0	23	0
Neophocaena_asiaeorientalis_asiaeorientalis	3	0	0	0	0	14	0	0	0	0	0	0	0	17	1	0	0	0	0	22	0	0	0	0	0	0	0	23	40	0	0	0	0	0	0	0	0	0	0	0	0	0	0	0	0	0	0	1	0
Empidonax_traillii	5	0	0	0	0	44	0	0	0	0	0	1	0	50	2	0	0	0	0	39	0	0	0	0	0	0	0	41	91	1	0	0	0	0	148	0	0	0	0	0	0	149	1	0	0	0	0	403	0
Equus_asinus_asinus	137	2	0	0	0	682	1	0	0	0	0	0	0	822	18	0	0	0	0	112	0	0	0	0	0	0	0	130	952	2	0	0	0	0	90	0	0	0	0	0	0	92	5	0	0	0	0	126	0
Seriola_lalandi	0	1	39	5	22	0	1	2	0	0	0	1	7	78	0	2	5	0	3	1	0	0	0	0	0	0	0	11	89	0	2	19	0	6	0	0	0	0	0	0	4	31	0	0	13	1	13	0	0
Sphenodon_punctatus	47	0	0	0	0	292	1	0	0	0	0	1	0	341	3	0	0	0	0	24	0	0	0	0	0	0	0	27	368	6	0	0	0	0	29	0	0	0	0	0	0	35	6	0	0	0	0	12	0
Macaca_fuscata_fuscata	70	0	0	0	0	315	0	0	0	0	0	1	0	386	21	0	0	0	0	43	0	0	0	0	0	0	0	64	450	0	0	0	0	0	0	0	0	0	0	0	0	0	3	0	0	0	0	11	0
Paroedura_picta	37	1	0	0	0	452	1	0	0	0	0	1	0	492	1	0	0	0	0	28	0	0	0	0	0	0	0	29	521	0	1	0	0	0	27	0	0	0	0	0	0	28	1	0	0	0	0	60	0
Ovis_ammon	2	0	0	0	0	352	0	0	0	0	0	0	0	354	0	0	0	0	0	67	0	0	0	0	0	0	0	67	421	1	0	0	0	0	20	0	0	0	0	0	0	21	2	0	0	0	0	48	0
Vulpes_vulpes	145	2	0	0	0	579	1	0	0	0	0	0	0	727	6	0	0	0	0	52	0	0	0	0	0	0	0	58	785	7	0	0	0	0	38	0	0	0	0	0	0	45	15	0	0	0	0	75	0
Pseudois_nayaur	118	2	0	0	0	649	1	0	0	0	0	0	0	770	12	0	0	0	0	135	0	0	0	0	0	0	0	147	917	5	0	0	0	0	52	0	0	0	0	0	0	57	22	0	0	0	0	128	0
Capra_sibirica	115	1	0	0	0	739	1	0	0	0	0	0	0	856	14	0	0	0	0	135	0	0	0	0	0	0	0	149	1005	5	0	0	0	0	53	0	0	0	0	0	0	58	13	0	0	0	0	41	0
Tursiops_aduncus	2	0	0	0	0	11	0	0	0	0	0	0	0	13	3	0	0	0	0	19	0	0	0	0	0	0	0	22	35	0	0	0	0	0	0	0	0	0	0	0	0	0	0	0	0	0	0	2	0
Thunnus_thynnus	0	1	13	3	6	0	0	0	0	0	0	0	2	25	0	0	4	0	1	1	0	0	0	0	0	0	0	6	31	0	1	11	2	3	0	1	1	0	0	1	1	21	0	0	30	5	16	0	0
Prolemur_simus	121	1	0	0	0	440	0	0	0	0	0	1	0	563	8	1	0	0	0	63	0	0	0	0	0	0	0	72	635	2	0	0	0	0	25	0	0	0	0	0	0	27	10	0	0	0	0	68	0
Athene_cunicularia	8	0	0	0	0	32	0	0	0	0	0	1	0	41	1	0	0	0	0	6	0	0	0	0	0	0	0	7	48	0	0	0	0	0	2	0	0	0	0	0	0	2	0	0	0	0	0	4	1
Spheniscus_mendiculus	6	0	0	0	0	20	0	0	0	0	0	1	0	27	5	0	0	0	0	6	0	0	0	0	0	0	0	11	38	0	0	0	0	0	3	0	0	0	0	0	0	3	0	0	0	0	0	5	0
Callorhinus_ursinus	34	0	0	0	0	334	1	0	0	0	0	0	0	369	14	0	0	0	0	87	0	0	0	0	0	0	0	101	470	2	0	0	0	0	11	0	0	0	0	0	0	13	4	0	0	0	0	62	0
Chlorodrepanis_virens	2	0	0	0	0	18	0	0	0	0	0	1	0	21	1	0	0	0	0	18	0	0	0	0	0	0	0	19	40	0	0	0	0	0	13	0	0	0	0	0	0	13	1	0	0	0	0	101	0
Hucho_hucho	0	3	35	7	9	2	2	1	0	0	0	2	9	70	0	0	1	1	1	2	0	1	0	0	0	0	2	8	78	0	0	1	1	0	0	0	0	0	0	0	2	4	0	0	4	1	0	1	0
Puma_concolor	94	0	0	0	0	497	1	0	0	0	0	0	0	592	10	0	0	0	0	51	0	0	0	0	0	0	0	61	653	28	0	0	0	0	108	0	0	0	0	0	0	136	10	0	0	0	0	51	0
Mus_spicilegus	114	1	0	0	0	850	0	0	0	0	0	0	0	965	6	2	0	0	0	81	0	0	0	0	0	0	0	89	1054	4	0	0	0	0	19	0	0	0	0	0	0	23	14	0	0	0	0	96	1
Eudromia_elegans	22	0	0	0	0	29	0	0	0	0	0	1	0	52	2	0	0	0	0	12	0	0	0	0	0	0	0	14	66	2	0	0	0	0	15	0	0	0	0	0	0	17	1	0	0	0	0	21	0
Rhea_pennata	21	1	0	0	0	49	0	0	0	0	0	1	0	72	2	0	0	0	0	14	0	0	0	0	0	0	0	16	88	0	0	0	0	0	10	0	0	0	0	0	0	10	0	0	0	0	0	16	0
Nothoprocta_perdicaria	16	0	0	0	0	87	0	0	0	0	0	1	0	104	1	0	0	0	0	27	0	0	0	0	0	0	0	28	132	1	0	0	0	0	27	0	0	0	0	0	0	28	2	0	0	0	0	17	0
Casuarius_casuarius	23	1	0	0	0	156	0	0	0	0	0	1	0	181	2	0	0	0	0	30	0	0	0	0	0	0	0	32	213	0	0	0	0	0	39	0	0	0	0	0	0	39	0	0	0	0	0	60	0
Crypturellus_cinnamomeus	27	0	0	0	0	99	0	0	0	0	0	1	0	127	2	0	0	0	0	30	0	0	0	0	0	0	0	32	159	6	0	0	0	0	50	0	0	0	0	0	0	56	5	0	0	0	0	63	0
Apteryx_owenii	19	1	0	0	0	175	0	0	0	0	0	1	0	196	2	0	0	0	0	69	0	0	0	0	0	0	0	71	267	0	0	0	0	0	103	0	0	0	0	0	0	103	4	0	0	0	0	234	0
Apteryx_haastii	17	1	0	0	0	84	0	0	0	0	0	1	0	103	2	0	0	0	0	28	0	0	0	0	0	0	0	30	133	2	0	0	0	0	41	0	0	0	0	0	0	43	3	0	0	0	0	77	0
Rhea_americana	19	1	0	0	0	59	0	0	0	0	0	1	0	80	1	0	0	0	0	18	0	0	0	0	0	0	0	19	99	0	0	0	0	0	11	0	0	0	0	0	0	11	1	0	0	0	0	29	0
Apteryx_rowi	12	1	0	0	0	123	0	0	0	0	0	1	0	137	2	0	0	0	0	50	0	0	0	0	0	0	0	52	189	1	0	0	0	0	55	0	0	0	0	0	0	56	5	0	0	0	0	120	0
Ageneiosus_marmoratus	0	8	34	6	17	0	2	0	0	0	0	2	6	75	0	0	2	0	2	0	0	0	0	0	0	0	2	6	81	0	1	11	3	5	0	0	0	0	0	0	0	20	0	0	5	0	0	0	1
Chlamydotis_undulata_undulata	11	0	0	0	0	94	0	0	0	0	0	1	0	106	0	1	0	0	0	22	0	0	0	0	0	0	0	23	129	0	0	0	0	0	33	0	0	0	0	0	0	33	0	0	0	0	0	4	0
Protobothrops_flavoviridis	27	1	0	0	0	446	1	0	0	0	0	1	0	476	2	1	0	0	0	55	0	0	0	0	0	0	0	58	534	0	0	0	0	0	13	0	0	0	0	0	0	13	5	0	0	0	0	30	0
Chrysolophus_pictus	7	0	0	0	0	30	0	0	0	0	0	1	0	38	3	0	0	0	0	4	0	0	0	0	0	1	0	8	46	1	0	0	0	0	6	0	0	0	0	0	0	7	0	0	0	0	0	19	0
Oplegnathus_fasciatus	0	7	56	6	20	0	1	2	0	0	0	1	6	99	0	0	11	0	6	3	0	0	0	0	0	0	0	20	119	0	1	39	0	13	0	0	0	0	0	0	15	68	0	0	12	0	5	0	0
Eopsaltria_australis	5	0	0	0	0	385	0	0	0	0	0	1	0	391	1	0	0	0	0	121	0	0	0	0	0	0	0	122	513	0	0	0	0	0	1	0	0	0	0	0	0	1	1	0	0	0	0	20	0
Urocitellus_parryii	101	2	0	0	0	642	1	0	0	0	0	1	0	747	7	0	0	0	0	76	0	0	0	0	0	0	0	83	830	11	0	0	0	0	112	0	0	0	0	0	0	123	9	0	0	0	0	117	0
Chiloscyllium_punctatum	0	1	0	0	0	0	2	0	0	0	0	5	0	8	1	0	0	0	0	1	0	0	0	0	0	0	0	2	10	0	0	0	0	0	0	0	0	0	0	0	0	0	0	0	0	0	0	0	0
Scyliorhinus_torazame	0	0	0	0	0	1	2	0	0	0	0	5	0	8	1	0	0	0	0	0	0	0	0	0	0	0	0	1	9	0	0	0	0	0	0	0	0	0	0	0	0	0	0	0	0	0	0	0	0
Syrmaticus_mikado	7	0	0	0	0	17	0	0	0	0	0	1	0	25	0	0	0	0	0	24	0	0	0	0	0	0	0	24	49	1	0	0	0	0	38	0	0	0	0	0	0	39	4	0	0	0	0	124	0
Thermophis_baileyi	18	1	0	0	0	375	1	0	0	0	0	1	0	396	3	0	0	0	0	57	0	0	0	0	0	0	0	60	456	0	0	0	0	0	5	0	0	0	0	0	0	5	2	1	0	0	0	33	0
Eonycteris_spelaea	77	0	0	0	0	156	1	0	0	0	0	0	0	234	20	0	0	0	0	124	0	0	0	0	0	0	0	144	378	0	0	0	0	0	0	0	0	0	0	0	0	0	0	0	0	0	0	31	0
Mixornis_gularis	4	0	0	0	0	16	0	0	0	0	0	1	0	21	0	0	0	0	0	2	0	0	0	0	0	0	0	2	23	0	0	0	0	0	1	0	0	0	0	0	0	1	0	0	0	0	0	2	0
Oxygymnocypris_stewartii	0	8	55	16	24	1	1	2	0	0	0	2	14	123	0	0	3	1	6	0	1	0	0	0	0	0	11	22	145	0	0	0	0	0	0	0	0	0	0	0	0	0	0	0	0	0	0	0	0
Ursus_arctos_horribilis	147	2	0	0	0	808	1	0	0	0	0	0	0	958	9	0	0	0	0	101	0	0	0	0	0	0	0	110	1068	2	0	0	0	0	34	0	0	0	0	0	0	36	19	0	0	0	0	119	0
Salvator_merianae	13	1	0	0	0	618	1	0	0	0	0	1	0	634	1	0	0	0	0	71	0	0	0	0	0	0	0	72	706	0	0	0	0	0	13	0	0	0	0	0	0	13	0	0	0	0	0	13	0
Anguilla_japonica	0	1	140	5	26	4	1	1	0	0	0	2	64	244	0	0	9	0	0	3	1	0	0	0	0	0	20	33	277	0	0	14	0	3	0	0	0	0	0	0	16	33	0	0	41	0	9	0	0
Chelonoidis_abingdonii	141	0	0	0	0	264	1	0	0	0	0	1	0	407	28	0	0	0	0	79	0	0	0	0	0	0	0	107	514	9	0	0	0	0	40	0	0	0	0	0	0	49	22	0	0	0	0	54	0
Sardina_pilchardus	0	1	51	4	32	2	1	1	0	0	0	3	4	99	0	0	5	0	3	0	1	0	0	0	0	0	0	9	108	0	0	2	0	1	0	0	0	0	0	0	0	3	0	0	9	0	0	0	0
Chloebia_gouldiae	4	0	0	0	0	130	0	0	0	0	0	1	0	135	0	0	0	0	0	43	0	0	0	0	0	0	0	43	178	0	0	0	0	0	16	0	0	0	0	0	0	16	0	0	0	0	0	90	0
Marmota_flaviventris	98	2	0	0	0	796	1	0	0	0	0	1	0	898	11	0	0	0	0	153	0	0	0	0	0	0	0	164	1062	3	0	0	0	0	21	0	0	0	0	0	0	24	16	0	0	0	0	182	0
Lagenorhynchus_obliquidens	4	0	0	0	0	17	0	0	0	0	0	0	0	21	1	0	0	0	0	14	0	0	0	0	0	0	0	15	36	0	0	0	0	0	0	0	0	0	0	0	0	0	0	0	0	0	0	1	0
Hirundo_rustica_rustica	3	0	0	0	0	392	0	0	0	0	0	1	0	396	0	0	0	0	0	7	0	0	0	0	0	0	0	7	403	0	0	0	0	0	1	0	0	0	0	0	0	1	0	0	0	0	0	5	0
Calidris_pygmaea	11	0	0	0	0	123	0	0	0	0	0	1	0	135	0	0	0	0	0	40	0	0	0	0	0	0	0	40	175	0	0	0	0	0	63	0	0	0	0	0	0	63	0	0	0	0	0	340	0
Odocoileus_hemionus_sitkensis	113	1	0	0	0	703	1	0	0	0	0	0	0	818	17	0	0	0	0	136	0	0	0	0	0	0	0	153	971	0	0	0	0	0	7	0	0	0	0	0	0	7	28	1	0	0	0	163	0
Taxidea_taxus_jeffersonii	129	2	0	0	0	644	1	0	0	0	0	0	0	776	10	0	0	0	0	92	0	0	0	0	0	0	0	102	878	2	0	0	0	0	7	0	0	0	0	0	0	9	7	0	0	0	0	72	0
Acinonyx_jubatus	202	2	0	0	0	1104	2	0	0	0	0	0	0	1310	16	2	0	0	0	108	0	0	0	0	0	0	0	126	1436	2	0	0	0	0	17	0	0	0	0	0	0	19	8	0	0	0	0	102	0
Paradisaea_rubra	8	0	0	0	0	17	0	0	0	0	0	1	0	26	0	0	0	0	0	5	0	0	0	0	0	0	0	5	31	0	0	0	0	0	4	0	0	0	0	0	0	4	0	0	0	0	0	1	0
Paradisaea_raggiana	8	0	0	0	0	15	0	0	0	0	0	1	0	24	0	0	0	0	0	3	0	0	0	0	0	0	0	3	27	0	0	0	0	0	2	0	0	0	0	0	0	2	0	0	0	0	0	1	0
Diphyllodes_magnificus	8	0	0	0	0	16	0	0	0	0	0	1	0	25	0	0	0	0	0	2	0	0	0	0	0	0	0	2	27	0	0	0	0	0	2	0	0	0	0	0	0	2	0	0	0	0	0	4	0
Parotia_lawesii	8	0	0	0	0	18	0	0	0	0	0	1	0	27	0	0	0	0	0	4	0	0	0	0	0	0	0	4	31	0	0	0	0	0	2	0	0	0	0	0	0	2	0	0	0	0	0	3	0
Cicinnurus_regius	8	0	0	0	0	18	0	0	0	0	0	1	0	27	0	0	0	0	0	3	0	0	0	0	0	0	0	3	30	0	0	0	0	0	0	0	0	0	0	0	0	0	0	0	0	0	0	7	0
Anabarilius_grahami	0	14	46	8	25	2	1	1	0	0	0	2	29	128	0	0	2	0	1	0	1	0	0	0	0	0	12	16	144	0	0	1	1	3	0	0	0	0	0	0	0	5	0	0	2	0	2	0	0
Axis_porcinus	170	2	0	0	0	978	2	0	0	0	0	0	0	1152	15	0	0	0	0	163	0	0	0	0	0	0	0	178	1330	5	0	0	0	0	43	0	0	0	0	0	0	48	55	0	0	0	0	353	0
Cuora_mccordi	328	1	0	0	0	514	1	0	0	0	0	1	0	845	29	0	0	0	0	107	0	0	0	0	0	0	0	136	981	5	0	0	0	0	18	0	0	0	0	0	0	23	136	0	0	0	0	431	0
Platysternon_megacephalum	398	1	0	0	0	457	1	0	0	0	0	1	0	858	21	0	0	0	0	65	0	0	0	0	0	0	0	86	944	38	0	0	0	0	33	0	0	0	0	0	0	71	148	0	0	0	0	134	0
Pipra_filicauda	3	0	0	0	0	228	0	0	0	0	0	1	0	232	1	0	0	0	0	61	0	0	0	0	0	0	0	62	294	0	0	0	0	0	0	0	0	0	0	0	0	0	0	0	0	0	0	8	0
Corapipo_altera	4	0	0	0	0	122	0	0	0	0	0	1	0	127	0	0	0	0	0	36	0	0	0	0	0	0	0	36	163	0	0	0	0	0	9	0	0	0	0	0	0	9	0	0	0	0	0	69	0
Oryx_gazella	112	1	0	0	0	658	0	0	0	0	0	0	0	771	19	1	0	0	0	144	0	0	0	0	0	0	0	164	935	8	0	0	0	0	30	0	0	0	0	0	0	38	11	0	0	0	0	112	1
Amazona_collaria	5	0	0	0	0	42	0	0	0	0	0	1	0	48	0	0	0	0	0	12	0	0	0	0	0	0	0	12	60	0	0	0	0	0	1	0	0	0	0	0	0	1	0	0	0	0	0	28	0
Neopelma_chrysocephalum	8	0	0	0	0	418	0	0	0	0	0	2	0	428	0	0	0	0	0	0	0	0	0	0	0	0	0	0	428	0	0	0	0	0	10	0	0	0	0	0	0	10	0	0	0	0	0	286	0
Clarias_batrachus	0	8	61	15	34	0	2	1	0	0	0	2	16	139	0	0	1	0	4	0	0	0	0	0	0	0	7	12	151	0	0	4	2	6	0	0	0	0	0	0	4	16	0	0	10	0	2	0	0
Himantopus_leucocephalus	10	0	0	0	0	45	0	0	0	0	0	1	0	56	1	0	0	0	0	6	0	0	0	0	0	0	0	7	63	2	0	0	0	0	1	0	0	0	0	0	0	3	1	0	0	0	0	0	0
Recurvirostra_avosetta	12	0	0	0	0	45	0	0	0	0	0	1	0	58	1	0	0	0	0	7	0	0	0	0	0	0	0	8	66	1	0	0	0	0	25	0	0	0	0	0	0	26	0	0	0	0	0	18	0
Hydrophis_hardwickii	1	0	0	0	0	42	1	0	0	0	0	1	0	45	3	0	0	0	0	27	0	0	0	0	0	0	0	30	75	1	0	0	0	0	19	0	0	0	0	0	0	20	3	1	0	0	0	73	0
Mungos_mungo	163	1	0	0	0	853	1	0	0	0	0	0	0	1018	28	1	0	0	0	138	0	0	0	0	0	0	0	167	1185	0	0	0	0	0	4	0	0	0	0	0	0	4	110	0	0	0	0	520	0
Panthera_onca	110	0	0	0	0	584	1	0	0	0	0	0	0	695	16	1	0	0	0	73	0	0	0	0	0	0	0	90	785	1	0	0	0	0	2	0	0	0	0	0	0	3	131	0	0	0	0	394	0
Helogale_parvula	165	0	0	0	0	825	1	0	0	0	0	0	0	991	19	2	0	0	0	120	0	0	0	0	0	0	0	141	1132	1	0	0	0	0	9	0	0	0	0	0	0	10	69	0	0	0	0	397	0
Cryptoprocta_ferox	129	1	0	0	0	585	1	0	0	0	0	0	0	716	23	1	0	0	0	64	0	0	0	0	0	0	0	88	804	0	0	0	0	0	0	0	0	0	0	0	0	0	272	0	0	0	0	386	0
Felis_nigripes	100	0	0	0	0	484	1	0	0	0	0	0	0	585	23	1	0	0	0	63	0	0	0	0	0	0	0	87	672	0	0	0	0	0	1	0	0	0	0	0	0	1	98	0	0	0	0	346	0
Spilogale_gracilis	121	2	0	0	0	659	1	0	0	0	0	0	0	783	15	0	0	0	0	130	0	0	0	0	0	0	0	145	928	2	0	0	0	0	2	0	0	0	0	0	0	4	84	0	0	0	0	517	0
Paradoxurus_hermaphroditus	139	2	0	0	0	820	1	0	0	0	0	0	0	962	24	0	0	0	0	109	0	0	0	0	0	0	0	133	1095	1	0	0	0	0	4	0	0	0	0	0	0	5	326	0	0	0	0	447	0
Pteronura_brasiliensis	99	0	0	0	0	494	1	0	0	0	0	0	0	594	19	2	0	0	0	89	0	0	0	0	0	0	0	110	704	0	0	0	0	0	0	0	0	0	0	0	0	0	35	0	0	0	0	142	0
Mellivora_capensis	121	2	0	0	0	618	1	0	0	0	0	0	0	742	22	0	0	0	0	109	0	0	0	0	0	0	0	131	873	0	0	0	0	0	1	0	0	0	0	0	0	1	177	0	0	0	0	616	0
Mirza_coquereli	127	1	0	0	0	606	0	0	0	0	0	0	0	734	9	1	0	0	0	67	0	0	0	0	0	1	0	78	812	1	0	0	0	0	0	0	0	0	0	0	0	1	124	4	0	0	0	283	0
Dipodomys_stephensi	75	1	0	0	0	715	0	0	0	0	0	1	0	792	2	1	0	0	0	97	0	0	0	0	0	0	0	100	892	0	0	0	0	0	1	0	0	0	0	0	0	1	42	0	0	0	0	265	0
Moschus_moschiferus	119	2	0	0	0	688	1	0	0	0	0	0	0	810	6	0	0	0	0	143	0	0	0	0	0	0	0	149	959	13	0	0	0	0	116	0	0	0	0	0	0	129	40	0	0	0	0	607	0
Catagonus_wagneri	82	1	0	0	0	623	1	0	0	0	0	0	0	707	8	0	0	0	0	152	0	0	0	0	0	1	0	161	868	20	0	0	0	0	123	0	0	0	0	0	0	143	35	0	0	0	0	2545	0
Zapus_hudsonius	85	1	0	0	0	643	1	0	0	0	0	0	0	730	10	1	0	0	0	147	0	0	0	0	0	0	0	158	888	0	0	0	0	0	3	0	0	0	0	0	0	3	119	0	0	0	0	704	0
Xerus_inauris	84	2	0	0	0	640	1	0	0	0	0	1	0	728	13	0	0	0	0	107	0	0	0	0	0	0	0	120	848	0	0	0	0	0	2	0	0	0	0	0	0	2	178	0	0	0	0	481	0
Pygathrix_nemaeus	36	0	0	0	0	178	1	0	0	0	0	0	0	215	10	0	0	0	0	46	0	0	0	0	0	0	0	56	271	0	0	0	0	0	0	0	0	0	0	0	0	0	0	0	0	0	0	52	0
Tonatia_saurophila	92	1	0	0	0	379	1	0	0	0	0	0	0	473	17	0	0	0	0	95	0	0	0	0	0	0	0	112	585	0	0	0	0	0	0	0	0	0	0	0	0	0	148	0	0	0	0	554	0
Saguinus_imperator	84	1	0	0	0	272	0	0	0	0	0	1	0	358	12	0	0	0	0	31	0	0	0	0	0	0	0	43	401	0	0	0	0	0	0	0	0	0	0	0	0	0	26	0	0	0	0	120	0
Tapirus_indicus	165	1	0	0	0	811	1	0	0	0	0	0	0	978	17	1	0	0	0	189	0	0	0	0	0	0	0	207	1185	0	0	0	0	0	1	0	0	0	0	0	0	1	50	0	0	0	0	709	0
Scalopus_aquaticus	87	0	0	0	0	1041	1	0	0	0	0	1	0	1130	4	1	0	0	0	198	0	0	0	0	0	0	0	203	1333	0	0	0	0	0	17	0	0	0	0	0	0	17	3	0	0	0	0	713	0
Uropsilus_gracilis	100	0	0	0	0	871	1	0	0	0	0	0	0	972	4	2	0	0	0	90	0	0	0	0	0	0	0	96	1068	0	0	0	0	0	0	0	0	0	0	0	0	0	22	0	0	0	0	302	0
Tragulus_javanicus	71	0	0	0	0	1000	1	0	0	0	0	0	0	1072	12	1	0	0	0	129	0	0	0	0	0	0	0	142	1214	9	0	0	0	0	136	0	0	0	0	0	0	145	10	0	0	0	0	739	0
Saiga_tatarica	44	0	0	0	0	404	0	0	0	0	0	0	0	448	19	1	0	0	0	109	0	0	0	0	0	0	0	129	577	0	0	0	0	0	0	0	0	0	0	0	0	0	134	1	0	0	0	539	0
Tadarida_brasiliensis	81	1	0	0	0	274	1	0	0	0	0	0	0	357	9	0	0	0	0	60	0	0	0	0	0	0	0	69	426	0	0	0	0	0	1	0	0	0	0	0	0	1	131	0	0	0	0	597	0
Tapirus_terrestris	140	2	0	0	0	789	1	0	0	0	0	0	0	932	20	0	0	0	0	182	0	0	0	0	0	0	0	202	1134	0	0	0	0	0	1	0	0	0	0	0	0	1	124	0	0	0	0	1075	0
Sigmodon_hispidus	136	1	0	0	0	918	1	0	0	0	0	0	0	1056	15	2	0	0	0	107	0	0	0	0	0	0	0	124	1180	0	0	0	0	0	4	0	0	0	0	0	0	4	31	0	0	0	0	147	0
Semnopithecus_entellus	23	0	0	0	0	172	1	0	0	0	0	1	0	197	8	0	0	0	0	38	0	0	0	0	0	0	0	46	243	0	0	0	0	0	0	0	0	0	0	0	0	0	0	0	0	0	0	100	0
Thryonomys_swinderianus	76	1	0	0	0	439	1	0	0	0	0	1	0	518	15	0	0	0	0	107	0	0	0	0	0	0	0	122	640	0	0	0	0	0	0	0	0	0	0	0	0	0	114	1	0	0	0	541	0
Tolypeutes_matacus	91	1	0	0	0	847	1	0	0	0	0	0	0	940	23	0	0	0	0	439	0	0	0	0	0	1	0	463	1403	0	0	0	0	0	6	0	0	0	0	0	0	6	409	0	0	0	0	3603	0
Miniopterus_schreibersii	85	0	0	0	0	221	1	0	0	0	0	0	0	307	5	1	0	0	0	34	0	0	0	0	0	0	0	40	347	0	0	0	0	0	1	0	0	0	0	0	0	1	36	0	0	0	0	153	0
Mormoops_blainvillei	64	0	0	0	0	197	1	0	0	0	0	0	0	262	4	1	0	0	0	39	0	0	0	0	0	0	0	44	306	0	0	0	0	0	0	0	0	0	0	0	0	0	59	0	0	0	0	154	0
Noctilio_leporinus	84	0	0	0	0	281	1	0	0	0	0	0	0	366	7	0	0	0	0	45	0	0	0	0	0	0	0	52	418	0	0	0	0	0	2	0	0	0	0	0	0	2	32	0	0	0	0	89	0
Ondatra_zibethicus	74	1	0	0	0	697	1	0	0	0	0	0	0	773	10	0	0	0	0	91	0	0	0	0	0	0	0	101	874	0	0	0	0	0	1	0	0	0	0	0	0	1	35	0	0	0	0	251	0
Murina_aurata_feae	102	0	0	0	0	388	1	0	0	0	0	0	0	491	10	1	0	0	0	68	0	0	0	0	0	0	0	79	570	0	0	0	0	0	1	0	0	0	0	0	0	1	53	0	0	0	0	388	0
Microgale_talazaci	132	1	0	0	0	907	1	0	0	0	0	0	0	1041	14	2	0	0	0	166	0	0	0	0	0	0	0	182	1223	0	0	0	0	0	2	0	0	0	0	0	0	2	72	0	0	0	0	451	0
Myrmecophaga_tridactyla	115	0	0	0	0	1107	1	0	0	0	0	0	0	1223	12	1	0	0	0	451	0	0	0	0	0	0	0	464	1687	1	0	0	0	0	0	0	0	0	0	0	0	1	233	0	0	0	0	2378	0
Micronycteris_hirsuta	103	0	0	0	0	437	1	0	0	0	0	0	0	541	14	1	0	0	0	72	0	0	0	0	0	0	0	87	628	0	0	0	0	0	0	0	0	0	0	0	0	0	121	0	0	0	0	488	0
Lasiurus_borealis	110	2	0	0	0	369	2	0	0	0	0	0	0	483	11	0	0	0	0	52	0	0	0	0	0	0	0	63	546	0	0	0	0	0	4	0	0	0	0	0	0	4	59	0	0	0	0	236	0
Hemitragus_hylocrius	106	2	0	0	0	641	1	0	0	0	0	0	0	750	13	0	0	0	0	121	0	0	0	0	0	0	0	134	884	0	0	0	0	0	2	0	0	0	0	0	0	2	54	0	0	0	0	250	0
Heterohyrax_brucei	126	1	0	0	0	681	1	0	0	0	0	0	0	809	13	0	0	0	0	98	0	0	0	0	0	0	0	111	920	0	0	0	0	0	0	0	0	0	0	0	0	0	47	0	0	0	0	289	0
Lepus_americanus	83	1	0	0	0	468	1	0	0	0	0	1	0	554	9	1	0	0	0	111	0	0	0	0	0	0	0	121	675	0	0	0	0	0	0	0	0	0	0	0	0	0	74	0	0	0	0	558	0
Megaderma_lyra	40	0	0	0	0	238	0	0	0	0	0	0	0	278	12	1	0	0	0	31	0	0	0	0	0	0	0	44	322	2	0	0	0	0	0	0	0	0	0	0	0	2	13	0	0	0	0	202	0
Hystrix_cristata	69	2	0	0	0	686	1	0	0	0	0	1	0	759	14	0	0	0	0	143	0	0	0	0	0	0	0	157	916	0	0	0	0	0	2	0	0	0	0	0	0	2	120	0	0	0	0	629	0
Procavia_capensis	107	1	0	0	0	636	1	0	0	0	0	0	0	745	19	1	0	0	0	99	0	0	0	0	0	0	0	119	864	24	0	0	0	0	127	0	0	0	0	0	0	151	86	0	0	0	0	771	0
Ovis_canadensis	94	2	0	0	0	658	1	0	0	0	0	0	0	755	22	0	0	0	0	125	0	0	0	0	0	0	0	147	902	0	0	0	0	0	3	0	0	0	0	0	0	3	35	0	0	0	0	292	0
Petromus_typicus	87	1	0	0	0	511	1	0	0	0	0	1	0	601	5	1	0	0	0	87	0	0	0	0	0	0	0	93	694	0	0	0	0	0	1	0	0	0	0	0	0	1	32	0	0	0	0	398	0
Muscardinus_avellanarius	109	2	0	0	0	625	0	0	0	0	0	0	0	736	7	0	0	0	0	52	0	0	0	0	0	0	0	59	795	0	0	0	0	0	2	0	0	0	0	0	0	2	10	0	0	0	0	126	0
Myocastor_coypus	75	1	0	0	0	554	1	0	0	0	0	1	0	632	8	0	0	0	0	101	0	0	0	0	0	0	0	109	741	0	0	0	0	0	0	0	0	0	0	0	0	0	136	0	0	0	0	367	0
Mesoplodon_bidens	3	0	0	0	0	30	0	0	0	0	0	0	0	33	1	0	0	0	0	19	0	0	0	0	0	0	0	20	53	0	0	0	0	0	0	0	0	0	0	0	0	0	2	0	0	0	0	79	0
Ctenomys_sociabilis	82	1	0	0	0	525	0	0	0	0	0	1	0	609	9	0	0	0	0	82	0	0	0	0	0	0	0	91	700	0	0	0	0	0	0	0	0	0	0	0	0	0	15	0	0	0	0	146	0
Glis_glis	116	2	0	0	0	702	0	0	0	0	0	0	0	820	17	0	0	0	0	97	0	0	0	0	0	0	0	114	934	0	0	0	0	0	1	0	0	0	0	0	0	1	26	0	0	0	0	178	0
Ctenodactylus_gundi	46	2	0	0	0	301	0	0	0	0	0	1	0	350	3	0	0	0	0	56	0	0	0	0	0	0	0	59	409	0	0	0	0	0	4	0	0	0	0	0	0	4	23	0	0	0	0	216	0
Eulemur_fulvus	128	0	0	0	0	581	1	0	0	0	0	1	0	711	11	2	0	0	0	108	0	0	0	0	0	0	0	121	832	0	0	0	0	0	0	0	0	0	0	0	0	0	127	0	0	0	0	510	0
Dolichotis_patagonum	72	0	0	0	0	458	1	0	0	0	0	1	0	532	16	1	0	0	0	118	0	0	0	0	0	0	0	135	667	0	0	0	0	0	2	0	0	0	0	0	0	2	108	0	0	0	0	811	0
Diceros_bicornis	141	0	0	0	0	928	1	0	0	0	0	0	0	1070	30	2	0	0	0	231	0	0	0	0	0	0	0	263	1333	8	0	0	0	0	100	0	0	0	0	0	0	108	51	0	0	0	0	1100	0
Macroglossus_sobrinus	72	0	0	0	0	331	1	0	0	0	0	0	0	404	8	1	0	0	0	58	0	0	0	0	0	0	0	67	471	0	0	0	0	0	0	0	0	0	0	0	0	0	5	0	0	0	0	284	0
Hipposideros_galeritus	69	0	0	0	0	182	0	0	0	0	0	0	0	251	7	1	0	0	0	45	0	0	0	0	0	0	0	53	304	0	0	0	0	0	0	0	0	0	0	0	0	0	79	0	0	0	0	314	0
Anoura_caudifer	78	0	0	0	0	317	1	0	0	0	0	0	0	396	15	0	0	0	0	51	0	0	0	0	0	0	0	66	462	0	0	0	0	0	0	0	0	0	0	0	0	0	61	0	0	0	0	364	0
Beatragus_hunteri	98	1	0	0	0	618	1	0	0	0	0	0	0	718	16	1	0	0	0	95	0	0	0	0	0	0	0	112	830	0	0	0	0	0	2	0	0	0	0	0	0	2	37	0	0	0	0	161	0
Acomys_cahirinus	116	1	0	0	0	720	1	0	0	0	0	0	0	838	6	0	0	0	0	86	0	0	0	0	0	0	0	92	930	0	0	0	0	0	4	0	0	0	0	0	0	4	33	6	0	0	0	138	0
Craseonycteris_thonglongyai	16	0	0	0	0	142	0	0	0	0	0	0	0	158	2	0	0	0	0	16	0	0	0	0	0	0	0	18	176	0	0	0	0	0	1	0	0	0	0	0	0	1	0	0	0	0	0	62	0
Cricetomys_gambianus	102	1	0	0	0	846	1	0	0	0	0	0	0	950	24	0	0	0	0	181	0	0	0	0	0	0	0	205	1155	0	0	0	0	0	2	0	0	0	0	0	0	2	141	9	0	0	0	915	0
Dinomys_branickii	98	0	0	0	0	767	0	0	0	0	0	1	0	866	26	2	0	0	0	164	0	0	0	0	0	0	0	192	1058	0	0	0	0	0	3	0	0	0	0	0	0	3	22	0	0	0	0	270	0
Cercopithecus_neglectus	33	0	0	0	0	230	0	0	0	0	0	1	0	264	7	0	0	0	0	39	1	0	0	0	0	0	0	47	311	1	0	0	0	0	1	0	0	0	0	0	0	2	28	0	0	0	0	259	0
Crocidura_indochinensis	96	1	0	0	0	769	1	0	0	0	0	0	0	867	35	1	0	0	0	181	0	0	0	0	0	0	0	217	1084	0	0	0	0	0	2	0	0	0	0	0	0	2	237	9	0	0	0	612	0
Graphiurus_murinus	125	1	0	0	0	703	1	0	0	0	0	0	0	830	15	0	0	0	0	143	1	0	0	0	0	0	0	159	989	0	0	0	0	0	1	0	0	0	0	0	0	1	198	6	0	0	0	365	0
Cavia_tschudii	130	1	0	0	0	673	1	0	0	0	0	1	0	806	26	1	0	0	0	121	0	0	0	0	0	0	0	148	954	0	0	0	0	0	0	0	0	0	0	0	0	0	121	0	0	0	0	189	0
Plecturocebus_donacophilus	59	0	0	0	0	200	0	0	0	0	0	1	0	260	17	1	0	0	0	49	0	0	0	0	0	0	0	67	327	0	0	0	0	0	0	0	0	0	0	0	0	0	49	0	0	0	0	89	0
Carollia_perspicillata	67	0	0	0	0	327	1	0	0	0	0	0	0	395	20	0	0	0	0	170	0	0	0	0	0	0	0	190	585	1	0	0	0	0	2	0	0	0	0	0	0	3	396	3	0	0	0	1405	0
Bradypus_variegatus	13	0	0	0	0	63	0	0	0	0	0	1	0	77	2	0	0	0	0	38	0	0	0	0	0	0	0	40	117	0	0	0	0	0	0	0	0	0	0	0	0	0	33	1	0	0	0	536	0
Nycticebus_coucang	128	0	0	0	0	477	0	0	0	0	0	1	0	606	20	1	0	0	0	84	1	0	0	0	0	0	0	106	712	0	0	0	0	0	0	0	0	0	0	0	0	0	110	0	0	0	0	337	0
Alouatta_palliata	65	1	0	0	0	238	0	0	0	0	0	0	0	304	6	0	0	0	0	47	0	0	0	0	0	0	0	53	357	0	0	0	0	0	0	0	0	0	0	0	0	0	7	0	0	0	0	62	0
Aplodontia_rufa	75	0	0	0	0	682	1	0	0	0	0	1	0	759	10	0	0	0	0	109	0	0	0	0	0	0	0	119	878	0	0	0	0	0	0	0	0	0	0	0	0	0	10	0	0	0	0	297	0
Orientallactaga_bullata	70	1	0	0	0	463	1	0	0	0	0	0	0	535	4	1	0	0	0	70	0	0	0	0	0	0	0	75	610	0	0	0	0	0	2	0	0	0	0	0	0	2	32	0	0	0	0	620	0
Capromys_pilorides	86	1	0	0	0	826	1	0	0	0	0	1	0	915	22	1	0	0	0	366	0	0	0	0	0	0	0	389	1304	0	0	0	0	0	0	0	0	0	0	0	0	0	216	0	0	0	0	1287	0
Chaetophractus_vellerosus	78	0	0	0	0	905	1	0	0	0	0	0	0	984	22	0	0	0	0	443	0	0	0	0	0	0	0	465	1449	1	0	0	0	0	0	0	0	0	0	0	0	1	270	1	0	0	0	8234	0
Eumetopias_jubatus	29	0	0	0	0	312	1	0	0	0	0	0	0	342	9	0	0	0	0	69	0	0	0	0	0	0	0	78	420	0	0	0	0	0	2	0	0	0	0	0	0	2	1	0	0	0	0	18	0
Cirrhinus_molitorella	0	10	48	13	21	1	2	1	0	0	0	2	20	118	0	0	2	1	1	0	0	0	0	0	0	0	10	14	132	0	0	6	1	2	0	0	0	0	0	0	5	14	0	0	22	4	20	0	0
Cuora_amboinensis	321	1	0	0	0	456	1	0	0	0	0	1	0	780	21	0	0	0	0	107	0	0	0	0	0	0	0	128	908	4	0	0	0	0	8	0	0	0	0	0	0	12	84	0	0	0	0	206	0
Odocoileus_hemionus_hemionus	124	2	0	0	0	622	1	0	0	0	0	0	0	749	13	0	0	0	0	107	0	0	0	0	0	0	0	120	869	18	0	0	0	0	212	0	0	0	0	0	0	230	2	0	0	0	0	24	0
Poropuntius_huangchuchieni	0	14	34	5	15	0	1	0	0	0	0	2	9	80	0	0	4	0	1	0	0	0	0	0	0	0	10	15	95	0	0	5	1	1	0	0	0	0	0	0	7	14	0	2	37	13	20	2	1
Phasianus_colchicus	7	0	0	0	0	42	0	0	0	0	0	1	0	50	0	0	0	0	0	3	0	0	0	0	0	0	0	3	53	1	0	0	0	0	7	0	0	0	0	0	0	8	7	0	0	0	0	174	0
Emydocephalus_ijimae	2	0	0	0	0	68	1	0	0	0	0	1	0	72	6	0	0	0	0	22	0	0	0	0	0	0	0	28	100	0	0	0	0	0	1	0	0	0	0	0	0	1	0	0	0	0	0	9	0
Hydrophis_melanocephalus	1	0	0	0	0	49	1	0	0	0	0	1	0	52	2	0	0	0	0	29	0	0	0	0	0	0	0	31	83	2	0	0	0	0	6	0	0	0	0	0	0	8	4	2	0	0	0	35	0
Laticauda_laticaudata	4	0	0	0	0	91	1	0	0	0	0	1	0	97	3	0	0	0	0	35	0	0	0	0	0	0	0	38	135	0	0	0	0	0	9	0	0	0	0	0	0	9	0	0	0	0	0	12	0
Scolopax_mira	9	0	0	0	0	31	0	0	0	0	0	1	0	41	1	0	0	0	0	13	0	0	0	0	0	0	0	14	55	1	0	0	0	0	90	0	0	0	0	0	0	91	0	0	0	0	0	247	0
Accipiter_nisus	13	0	0	0	0	27	0	0	0	0	0	1	0	41	0	0	0	0	0	5	0	0	0	0	0	0	0	5	46	1	0	0	0	0	6	0	0	0	0	0	0	7	1	0	0	0	0	33	0
Dendrocopos_noguchii	1	0	0	0	0	23	0	0	0	0	0	1	0	25	0	0	0	0	0	13	0	0	0	0	0	0	0	13	38	0	0	0	0	0	9	0	0	0	0	0	0	9	0	0	0	0	0	146	0
Lagopus_muta_japonica	6	0	0	0	0	18	0	0	0	0	0	1	0	25	1	0	0	0	0	8	0	0	0	0	0	0	0	9	34	0	0	0	0	0	3	0	0	0	0	0	0	3	0	0	0	0	0	43	0
Bubo_blakistoni	11	0	0	0	0	40	0	0	0	0	0	1	0	52	2	0	0	0	0	6	0	0	0	0	0	0	0	8	60	0	0	0	0	0	8	0	0	0	0	0	0	8	0	0	0	0	0	79	0
Megaptera_novaeangliae	5	0	0	0	0	65	0	0	0	0	0	0	0	70	1	0	0	0	0	33	0	0	0	0	0	0	0	34	104	1	0	0	0	0	10	0	0	0	0	0	0	11	3	0	0	0	0	12	0
Pseudoliparis_sp_Yap_Trench	0	1	37	2	3	0	1	0	0	0	0	1	6	51	0	0	2	0	1	0	0	0	0	0	0	0	2	5	56	0	0	0	0	0	0	0	0	0	0	0	0	0	0	0	0	0	0	0	0
Phoca_vitulina	26	0	0	0	0	310	1	0	0	0	0	0	0	337	11	0	0	0	0	56	0	0	0	0	0	0	0	67	404	1	0	0	0	0	6	0	0	0	0	0	0	7	0	0	0	0	0	51	0
Anarrhichthys_ocellatus	0	3	31	3	6	0	1	1	0	0	0	2	6	53	0	0	2	0	1	1	0	1	0	0	0	0	1	6	59	0	0	1	0	0	0	0	0	0	0	0	1	2	0	0	13	1	5	0	0
Grus_nigricollis	12	0	0	0	0	83	0	0	0	0	0	1	0	96	1	0	0	0	0	22	0	0	0	0	0	0	0	23	119	0	0	0	0	0	0	0	0	0	0	0	0	0	0	0	0	0	0	4	0
Platanista_minor	2	0	0	0	0	18	0	0	0	0	0	0	0	20	1	0	0	0	0	29	0	0	0	0	0	0	0	30	50	0	0	0	0	0	0	0	0	0	0	0	0	0	0	0	0	0	0	18	0
Eubalaena_japonica	5	0	0	0	0	90	0	0	0	0	0	0	0	95	3	0	0	0	0	35	0	0	0	0	0	0	0	38	133	0	0	0	0	0	1	0	0	0	0	0	0	1	0	0	0	0	0	75	0
Phocoena_phocoena	3	0	0	0	0	12	0	0	0	0	0	0	0	15	1	0	0	0	0	21	0	0	0	0	0	0	0	22	37	0	0	0	0	0	0	0	0	0	0	0	0	0	0	0	0	0	0	1	0
Inia_geoffrensis	3	0	0	0	0	17	0	0	0	0	0	0	0	20	2	0	0	0	0	24	0	0	0	0	0	0	0	26	46	0	0	0	0	0	0	0	0	0	0	0	0	0	0	0	0	0	0	2	0
Dasyprocta_punctata	191	1	0	0	0	1674	1	0	0	0	0	1	0	1868	27	1	0	0	0	376	0	0	0	0	0	0	0	404	2272	0	0	0	0	0	3	0	0	0	0	0	0	3	140	0	0	0	0	664	0
Solenodon_paradoxus	128	2	0	0	0	816	1	0	0	0	0	1	0	948	16	0	0	0	0	138	0	0	0	0	0	0	0	154	1102	0	0	0	0	0	3	0	0	0	0	0	0	3	19	0	0	0	0	484	0
Indri_indri	118	0	0	0	0	387	1	0	0	0	0	0	0	506	11	1	0	0	0	75	0	0	0	0	0	1	0	88	594	0	0	0	0	0	1	0	0	0	0	0	0	1	86	0	0	0	0	563	0
Kogia_breviceps	1	0	0	0	0	8	0	0	0	0	0	0	0	9	3	0	0	0	0	16	0	0	0	0	0	0	0	19	28	0	0	0	0	0	0	0	0	0	0	0	0	0	0	0	0	0	0	20	0
Ziphius_cavirostris	3	0	0	0	0	30	0	0	0	0	0	0	0	33	3	0	0	0	0	14	0	0	0	0	0	0	0	17	50	0	0	0	0	0	0	0	0	0	0	0	0	0	13	0	0	0	0	176	0
Orycteropus_afer	128	1	0	0	0	1076	0	0	0	0	0	0	0	1205	36	1	0	0	0	242	0	0	0	0	0	0	0	279	1484	0	0	0	0	0	5	0	0	0	0	0	0	5	218	9	0	0	0	959	0
Cuniculus_paca	100	1	0	0	0	670	1	0	0	0	0	1	0	773	14	0	0	0	0	217	0	0	0	0	0	0	0	231	1004	0	0	0	0	0	2	0	0	0	0	0	0	2	410	1	0	0	0	1907	11
Tupaia_tana	132	0	0	0	0	747	1	0	0	0	0	0	0	880	27	3	0	0	0	253	0	0	0	0	0	0	0	283	1163	0	0	0	0	0	1	0	0	0	0	0	0	1	363	1	0	0	0	1650	0
Phataginus_tricuspis	108	0	0	0	0	470	0	0	0	0	0	1	0	579	15	0	0	0	0	189	0	0	0	0	0	0	0	204	783	0	0	0	0	0	2	0	0	0	0	0	0	2	223	0	0	0	0	2148	0
Grammomys_surdaster	122	1	0	0	0	868	1	0	0	0	0	0	0	992	6	2	0	0	0	84	0	0	0	0	0	0	0	92	1084	2	0	0	0	0	16	0	0	0	0	0	0	18	7	0	0	0	0	57	0
Varanus_komodoensis	2	0	0	0	0	241	1	0	0	0	0	1	0	245	0	0	0	0	0	35	0	0	0	0	0	0	0	35	280	0	0	0	0	0	9	0	0	0	0	0	0	9	0	0	0	0	0	10	0
Morone_saxatilis	0	1	23	2	10	1	1	1	0	0	0	1	1	41	0	1	6	0	2	0	0	1	0	0	0	0	1	11	52	0	0	7	0	3	0	0	0	0	0	0	2	12	0	0	11	0	6	0	0
Planiliza_haematocheilus	0	10	136	8	54	0	1	1	0	0	0	1	15	226	0	0	9	0	3	0	0	0	0	0	0	0	2	14	240	0	0	0	0	0	0	0	0	0	0	0	0	0	0	0	0	0	0	0	0
Monodon_monoceros	3	0	0	0	0	11	0	0	0	0	0	0	0	14	2	0	0	0	0	14	0	0	0	0	0	0	0	16	30	0	0	0	0	0	0	0	0	0	0	0	0	0	0	0	0	0	0	0	0
Marmota_himalayana	116	3	0	0	0	765	1	0	0	0	0	1	0	886	12	0	0	0	0	159	0	0	0	0	0	0	0	171	1057	3	0	0	0	0	31	0	0	0	0	0	0	34	1	0	0	0	0	13	0
Prionailurus_bengalensis_euptilurus	112	0	0	0	0	514	1	0	0	0	0	0	0	627	9	1	0	0	0	57	0	0	0	0	0	0	0	67	694	18	0	0	0	0	84	0	0	0	0	0	0	102	20	0	0	0	0	97	0
Macquaria_australasica	0	4	59	6	12	0	1	0	0	0	0	1	10	93	0	0	9	0	3	1	0	0	0	0	0	0	8	21	114	0	0	0	0	0	0	0	0	0	0	0	0	0	0	0	0	0	0	0	0
Marmota_vancouverensis	96	2	0	0	0	722	1	0	0	0	0	1	0	822	8	0	0	0	0	129	0	0	0	0	0	0	0	137	959	7	0	0	0	0	76	0	0	0	0	0	0	83	6	0	0	0	0	98	0
Bagarius_yarrelli	0	6	20	4	11	0	2	1	0	0	0	2	8	54	0	0	1	0	1	0	0	0	0	0	0	0	2	4	58	0	0	0	0	0	0	0	0	0	0	0	0	0	0	0	0	0	0	0	0
Centrocercus_minimus	2	0	0	0	0	3	0	0	0	0	0	1	0	6	3	0	0	0	0	10	0	0	0	0	0	0	0	13	19	0	0	0	0	0	0	0	0	0	0	0	0	0	0	0	0	0	0	1	0
Triplophysa_siluroides	0	6	25	5	14	1	1	1	0	0	0	2	6	61	0	2	8	1	0	0	1	0	0	0	0	0	3	15	76	0	0	0	0	0	0	0	0	0	0	0	0	0	0	0	0	0	0	0	0
Branta_canadensis	13	0	0	0	0	534	0	0	0	0	0	1	0	548	0	0	0	0	0	130	0	0	0	0	0	0	0	130	678	0	0	0	0	0	15	0	0	0	0	0	0	15	0	0	0	0	0	136	0
Anser_indicus	13	0	0	0	0	172	0	0	0	0	0	1	0	186	0	0	0	0	0	26	0	0	0	0	0	0	0	26	212	0	0	0	0	0	2	0	0	0	0	0	0	2	0	0	0	0	0	75	0
Liparis_tanakae	0	1	29	4	3	0	1	0	0	0	0	1	6	45	0	0	2	0	1	0	0	0	0	0	0	0	0	3	48	0	0	5	0	4	0	0	0	0	0	0	0	9	0	0	7	1	9	0	0
Cervus_albirostris	150	1	0	0	0	932	1	0	0	0	0	0	0	1084	12	1	0	0	0	205	0	0	0	0	0	0	0	218	1302	15	0	0	0	0	165	0	0	0	0	0	0	180	45	0	0	0	0	300	0
Damaliscus_lunatus	135	1	0	0	0	763	1	0	0	0	0	0	0	900	15	1	0	0	0	137	0	0	0	0	0	0	0	153	1053	8	0	0	0	0	65	0	0	0	0	0	0	73	13	0	0	0	0	138	0
Alcelaphus_buselaphus	14	0	0	0	0	72	0	0	0	0	0	0	0	86	8	2	0	0	0	23	0	0	0	0	0	0	0	33	119	28	0	0	0	0	144	1	0	0	0	0	0	173	65	0	0	0	0	285	0
Giraffa_camelopardalis	98	1	0	0	0	473	0	0	0	0	0	0	0	572	7	1	0	0	0	89	0	0	0	0	0	0	0	97	669	4	0	0	0	0	28	1	0	0	0	0	0	33	8	0	0	0	0	98	0
Antidorcas_marsupialis	100	2	0	0	0	595	2	0	0	0	0	0	0	699	16	0	0	0	0	131	0	0	0	0	0	0	0	147	846	12	0	0	0	0	139	0	0	0	0	0	0	151	12	0	0	0	0	93	0
Connochaetes_taurinus	125	1	0	0	0	651	1	0	0	0	0	0	0	778	10	1	0	0	0	107	0	0	0	0	0	0	0	118	896	4	0	0	0	0	21	0	0	0	0	0	0	25	16	0	0	0	0	76	0
Nanger_granti	85	2	0	0	0	531	0	0	0	0	0	0	0	618	32	1	0	0	0	177	1	0	0	0	0	0	0	211	829	9	0	0	0	0	103	0	0	0	0	0	0	112	14	0	0	0	0	107	0
Madoqua_kirkii	68	1	0	0	0	495	0	0	0	0	0	0	0	564	25	0	0	0	0	147	0	0	0	0	0	0	0	172	736	0	0	0	0	0	1	0	0	0	0	0	0	1	11	0	0	0	0	72	0
Aepyceros_melampus	40	1	0	0	0	196	1	0	0	0	0	0	0	238	35	1	0	0	0	228	0	0	0	0	0	0	0	264	502	0	0	0	0	0	15	0	0	0	0	0	0	15	5	0	0	0	0	18	0
Sylvicapra_grimmia	109	1	0	0	0	632	1	0	0	0	0	0	0	743	15	1	0	0	0	106	0	0	0	0	0	0	0	122	865	24	0	0	0	0	199	0	0	0	0	0	0	223	9	0	0	0	0	89	0
Eudorcas_thomsonii	122	1	0	0	0	675	0	0	0	0	0	0	0	798	9	1	0	0	0	95	0	0	0	0	0	0	0	105	903	5	0	0	0	0	73	0	0	0	0	0	0	78	2	0	0	0	0	140	0
Tragelaphus_scriptus	129	1	0	0	0	834	1	0	0	0	0	0	0	965	16	1	0	0	0	160	0	0	0	0	0	0	0	177	1142	14	0	0	0	0	140	0	0	0	0	0	0	154	26	0	0	0	0	165	0
Procapra_przewalskii	58	1	0	0	0	413	1	0	0	0	0	0	0	473	1	1	0	0	0	48	0	0	0	0	0	0	0	50	523	13	0	0	0	0	122	0	0	0	0	0	0	135	5	0	0	0	0	82	0
Litocranius_walleri	120	1	0	0	0	683	1	0	0	0	0	0	0	805	14	0	0	0	0	142	0	0	0	0	0	0	0	156	961	0	0	0	0	0	17	0	0	0	0	0	0	17	9	0	0	0	0	57	0
Capra_ibex	1	0	0	0	0	318	0	0	0	0	0	0	0	319	0	0	0	0	0	64	0	0	0	0	0	0	0	64	383	0	0	0	0	0	25	0	0	0	0	0	0	25	4	0	0	0	0	27	0
Neotragus_moschatus	88	1	0	0	0	485	1	0	0	0	0	0	0	575	8	1	0	0	0	85	0	0	0	0	0	0	0	94	669	16	0	0	0	0	139	0	0	0	0	0	0	155	19	0	0	0	0	188	0
Cephalophus_harveyi	135	2	0	0	0	808	1	0	0	0	0	0	0	946	9	0	0	0	0	151	0	0	0	0	0	0	0	160	1106	10	0	0	0	0	58	0	0	0	0	0	0	68	18	0	0	0	0	98	0
Kobus_ellipsiprymnus	133	2	0	0	0	769	1	0	0	0	0	0	0	905	10	0	0	0	0	113	0	0	0	0	0	0	0	123	1028	7	0	0	0	0	36	0	0	0	0	0	0	43	10	0	0	0	0	70	0
Oreotragus_oreotragus	120	2	0	0	0	694	0	0	0	0	0	0	0	816	18	1	0	0	0	106	0	0	0	0	0	0	0	125	941	16	0	0	0	0	96	0	0	0	0	0	0	112	4	0	0	0	0	37	0
Philantomba_maxwellii	77	1	0	0	0	344	1	0	0	0	0	0	0	423	7	2	0	0	0	59	0	0	0	0	0	0	0	68	491	26	0	0	0	0	136	0	0	0	0	0	0	162	8	0	0	0	0	55	0
Enhydra_lutris_nereis	73	0	0	0	0	393	1	0	0	0	0	0	0	467	15	0	0	0	0	95	0	0	0	0	0	0	0	110	577	6	0	0	0	0	32	0	0	0	0	0	0	38	20	0	0	0	0	130	0
Raphicerus_campestris	98	1	0	0	0	552	0	0	0	0	0	0	0	651	6	1	0	0	0	85	0	0	0	0	0	0	0	92	743	15	0	0	0	0	144	0	0	0	0	0	0	159	10	0	0	0	0	66	0
Tragelaphus_imberbis	136	3	0	0	0	855	2	0	0	0	0	0	0	996	12	0	0	0	0	172	0	0	0	0	0	0	0	184	1180	27	1	0	0	0	234	0	0	0	0	0	0	262	41	0	0	0	0	211	0
Tragelaphus_strepsiceros	122	2	0	0	0	863	1	0	0	0	0	0	0	988	16	0	0	0	0	144	0	0	0	0	0	0	0	160	1148	19	0	0	0	0	109	0	0	0	0	0	0	128	35	0	0	0	0	217	0
Neotragus_pygmaeus	107	2	0	0	0	576	2	0	0	0	0	0	0	687	13	0	0	0	0	100	0	0	0	0	0	0	0	113	800	21	0	0	0	0	158	0	0	0	0	0	0	179	24	0	0	0	0	229	0
Redunca_redunca	120	1	0	0	0	669	1	0	0	0	0	0	0	791	13	0	0	0	0	99	0	0	0	0	0	0	0	112	903	2	1	0	0	0	58	0	0	0	0	0	0	61	23	0	0	0	0	117	0
Tragelaphus_spekii	129	2	0	0	0	682	1	0	0	0	0	0	0	814	12	0	0	0	0	125	0	0	0	0	0	0	0	137	951	28	0	0	0	0	190	0	0	0	0	0	0	218	174	0	0	0	0	544	0
Tragelaphus_buxtoni	33	1	0	0	0	210	0	0	0	0	0	0	0	244	3	1	0	0	0	42	0	0	0	0	0	0	0	46	290	55	0	0	0	0	422	0	0	0	0	0	0	477	257	1	0	0	0	863	2
Tragelaphus_oryx	41	0	0	0	0	183	1	0	0	0	0	0	0	225	7	0	0	0	0	72	0	0	0	0	0	0	0	79	304	0	0	0	0	0	0	0	0	0	0	0	0	0	317	3	0	0	0	1623	0
Ourebia_ourebi	51	1	0	0	0	177	1	0	0	0	0	0	0	230	13	1	0	0	0	82	0	0	0	0	0	0	0	96	326	0	0	0	0	0	0	0	0	0	0	0	0	0	173	0	0	0	0	929	0
Moschus_chrysogaster	73	1	0	0	0	364	1	0	0	0	0	0	0	439	8	1	0	0	0	130	0	0	0	0	0	0	0	139	578	29	0	0	0	0	221	0	0	0	0	0	0	250	48	0	0	0	0	192	0
Erethizon_dorsatum	103	1	0	0	0	672	1	0	0	0	0	1	0	778	10	1	0	0	0	99	0	0	0	0	0	0	0	110	888	5	0	0	0	0	14	0	0	0	0	0	0	19	23	0	0	0	0	66	0
Globicephala_melas	2	0	0	0	0	19	0	0	0	0	0	0	0	21	2	0	0	0	0	13	0	0	0	0	0	0	0	15	36	0	0	0	0	0	0	0	0	0	0	0	0	0	0	0	0	0	0	0	0
Anomalopteryx_didiformis	9	0	0	0	0	16	0	0	0	0	0	0	0	25	0	0	0	0	0	5	0	0	0	0	0	0	0	5	30	8	1	0	0	0	41	0	0	0	0	1	0	51	1	0	0	0	0	10	0
Pachypanchax_playfairii	0	3	48	7	19	0	1	1	0	0	0	1	9	89	0	0	0	0	3	1	0	0	0	0	0	0	1	5	94	0	0	1	0	0	0	0	0	0	0	0	0	1	0	0	0	0	0	0	0
Callopanchax_toddi	0	5	54	15	27	1	1	1	0	0	0	1	15	120	0	1	2	0	14	0	0	0	0	0	0	0	19	36	156	0	0	3	1	1	0	0	0	0	0	0	0	5	0	0	1	0	0	0	0
Aphyosemion_australe	0	6	61	13	33	1	1	1	0	0	0	1	16	133	0	0	1	2	12	0	0	0	0	0	0	0	7	22	155	0	0	0	0	0	0	0	0	0	0	0	0	0	0	0	5	0	0	0	0
Nothobranchius_kuhntae	0	4	57	14	22	0	1	1	0	0	0	1	11	111	0	0	7	0	4	0	0	0	0	0	0	0	2	13	124	0	0	5	2	1	0	0	0	0	0	0	3	11	0	1	4	0	2	0	0
Hippotragus_niger_niger	116	1	0	0	0	698	1	0	0	0	0	0	0	816	11	0	0	0	0	122	0	0	0	0	0	0	0	133	949	6	0	0	0	0	34	0	0	0	0	0	0	40	0	0	0	0	0	33	0
Serinus_canaria	3	0	0	0	0	56	0	0	0	0	0	1	0	60	0	0	0	0	0	20	0	0	0	0	0	0	0	20	80	0	0	0	0	0	8	0	0	0	0	0	0	8	0	0	0	0	0	23	0
Neogobius_melanostomus	0	2	45	5	18	0	1	0	0	0	0	1	7	79	0	1	15	0	23	0	0	0	0	0	0	0	0	39	118	0	0	0	0	0	0	0	0	0	0	0	0	0	0	0	0	0	0	0	0
Danionella_translucida	0	2	37	3	15	0	1	3	0	0	0	2	12	75	0	0	1	0	2	0	1	0	0	0	0	0	4	8	83	0	0	0	0	0	0	0	0	0	0	0	0	0	0	0	0	1	0	0	0
Zosterops_borbonicus	3	0	0	0	0	54	0	0	0	0	0	1	0	58	0	0	0	0	0	9	0	0	0	0	0	0	0	9	67	1	0	0	0	0	55	0	0	0	0	0	0	56	1	0	0	0	0	43	0
Microtus_oeconomus	90	1	0	0	0	850	1	0	0	0	0	0	0	942	7	1	0	0	0	114	0	0	0	0	0	0	0	122	1064	0	0	0	0	0	3	0	0	0	0	0	0	3	7	0	0	0	0	198	0
Microtus_arvalis	94	1	0	0	0	905	0	0	0	0	0	0	0	1000	7	1	0	0	0	135	1	0	0	0	0	0	0	144	1144	0	0	0	0	0	5	0	0	0	0	0	0	5	8	3	0	0	0	325	2
Zosterops_pallidus	4	0	0	0	0	13	0	0	0	0	0	1	0	18	0	0	0	0	0	3	0	0	0	0	0	0	0	3	21	0	0	0	0	0	10	0	0	0	0	0	0	10	0	0	0	0	0	41	0
Alces_alces	113	0	0	0	0	680	1	0	0	0	0	0	0	794	15	2	0	0	0	118	0	0	0	0	0	0	0	135	929	0	0	0	0	0	36	0	0	0	0	0	0	36	14	0	0	0	0	135	0
Antilocapra_americana	97	2	0	0	0	597	1	0	0	0	0	0	0	697	12	0	0	0	0	119	0	0	0	0	0	0	0	131	828	2	0	0	0	0	15	0	0	0	0	0	0	17	9	0	0	0	0	77	0
Tachycineta_bicolor	3	0	0	0	0	13	0	0	0	0	0	1	0	17	0	0	0	0	0	4	0	0	0	0	0	0	0	4	21	0	0	0	0	0	0	0	0	0	0	0	0	0	0	0	0	0	0	2	0
Sousa_chinensis	4	0	0	0	0	12	0	0	0	0	0	0	0	16	2	0	0	0	0	18	1	0	0	0	0	0	0	21	37	0	1	0	0	0	0	0	0	0	0	0	0	1	0	0	0	0	1	1	0
Peromyscus_californicus_insignis	127	1	0	0	0	871	1	0	0	0	0	0	0	1000	6	2	0	0	0	70	0	0	0	0	0	0	0	78	1078	0	0	0	0	0	0	0	0	0	0	0	0	0	0	0	0	0	0	0	0
Bos_frontalis	127	1	0	0	0	766	1	0	0	0	0	0	0	895	8	0	0	0	0	143	0	0	0	0	0	0	0	151	1046	9	0	0	0	0	105	0	0	0	0	0	0	114	9	0	0	0	0	67	0
Mesoclemmys_tuberculata	228	1	0	0	0	491	1	0	0	0	0	1	0	722	28	0	0	0	0	77	0	0	0	0	0	0	0	105	827	4	0	0	0	0	11	0	0	0	0	0	0	15	122	0	0	0	0	177	0
Pelusios_castaneus	371	1	0	0	0	366	1	0	0	0	0	1	0	740	33	0	0	0	0	41	0	0	0	0	0	0	0	74	814	6	0	0	0	0	4	0	0	0	0	0	0	10	185	0	0	0	0	70	0
Carettochelys_insculpta	366	1	0	0	0	288	1	0	0	0	0	1	0	657	28	0	0	0	0	38	0	0	0	0	0	0	0	66	723	12	0	0	0	0	9	0	0	0	0	0	0	21	88	0	0	0	0	107	0
Podocnemis_expansa	634	0	0	0	0	421	1	0	0	0	0	1	0	1057	3	0	0	0	0	1	0	0	0	0	0	0	0	4	1061	17	0	0	0	0	6	0	0	0	0	0	0	23	99	0	0	0	0	29	0
Emydura_subglobosa	379	0	0	0	0	647	1	0	0	0	0	1	0	1028	1	0	0	0	0	9	0	0	0	0	0	0	0	10	1038	4	0	0	0	0	17	0	0	0	0	0	0	21	92	0	0	0	0	361	0
Dermatemys_mawii	544	1	0	0	0	416	1	0	0	0	0	1	0	963	34	0	0	0	0	47	0	0	0	0	0	0	0	81	1044	6	0	0	0	0	9	0	0	0	0	0	0	15	67	0	0	0	0	61	0
Pedetes_capensis	81	1	0	0	0	587	0	0	0	0	0	1	0	670	6	2	0	0	0	86	0	0	0	0	0	0	0	94	764	0	0	0	0	0	1	0	0	0	0	0	0	1	20	0	0	0	0	210	0
Antrozous_pallidus	82	0	0	0	0	365	0	0	0	0	0	0	0	447	12	0	0	0	0	79	0	0	0	0	0	0	0	91	538	0	0	0	0	0	1	0	0	0	0	0	0	1	69	0	0	0	0	345	3
Nycticeius_humeralis	98	0	0	0	0	296	1	0	0	0	0	0	0	395	10	1	0	0	0	44	0	0	0	0	0	0	0	55	450	0	0	0	0	0	0	0	0	0	0	0	0	0	98	0	0	0	0	347	0
Macrotus_californicus	88	1	0	0	0	246	1	0	0	0	0	0	0	336	5	0	0	0	0	38	0	0	0	0	0	0	0	43	379	0	0	0	0	0	0	0	0	0	0	0	0	0	33	0	0	0	0	281	0
Pseudorectes_ferrugineus	7	0	0	0	0	14	0	0	0	0	0	1	0	22	1	0	0	0	0	3	0	0	0	0	0	0	0	4	26	0	0	0	0	0	1	0	0	0	0	0	0	1	0	0	0	0	0	5	0
Thalassoma_bifasciatum	0	5	93	3	19	2	1	0	0	0	0	1	5	129	0	0	5	0	2	0	0	0	0	0	0	0	6	13	142	0	2	8	0	2	0	0	0	0	0	0	0	12	0	2	63	0	1	0	0
Cheirogaleus_medius	111	1	0	0	0	478	1	0	0	0	0	0	0	591	8	0	0	0	0	30	0	0	0	0	0	0	0	38	629	14	0	0	0	0	55	0	0	0	0	0	0	69	14	1	0	0	0	101	0
Oreochromis_spilurus	0	2	43	0	12	0	1	1	0	0	0	1	11	71	0	0	5	0	3	1	0	0	0	0	0	0	1	10	81	0	0	0	0	0	0	0	0	0	0	0	0	0	0	4	114	10	38	0	0
Macquaria_ambigua	0	4	51	9	14	1	1	0	0	0	0	1	8	89	0	0	10	0	3	0	0	0	0	0	0	0	1	14	103	0	0	0	0	0	0	0	0	0	0	0	0	0	0	0	2	0	0	0	0
Oryzias_sinensis	0	2	19	4	14	1	1	1	0	0	0	1	4	47	0	0	4	0	3	0	0	0	0	0	0	0	3	10	57	0	0	4	0	3	0	0	0	0	0	0	1	8	0	0	25	0	8	0	0
Colinus_virginianus	7	0	0	0	0	14	0	0	0	0	0	1	0	22	0	0	0	0	0	1	0	0	0	0	0	0	0	1	23	0	0	0	0	0	2	0	0	0	0	0	0	2	2	0	0	0	0	2	0
Crocuta_crocuta	118	0	0	0	0	652	1	0	0	0	0	0	0	771	12	1	0	0	0	64	0	0	0	0	0	0	0	77	848	6	0	0	0	0	32	0	0	0	0	0	0	38	31	0	0	0	0	74	0
Cyanoderma_ruficeps	4	0	0	0	0	15	0	0	0	0	0	1	0	20	0	0	0	0	0	3	0	0	0	0	0	0	0	3	23	0	0	0	0	0	2	0	0	0	0	0	0	2	0	0	0	0	0	3	0
Charadrius_alexandrinus	12	0	0	0	0	66	0	0	0	0	0	1	0	79	1	0	0	0	0	5	0	0	0	0	0	0	0	6	85	0	0	0	0	0	22	0	0	0	0	0	0	22	0	0	0	0	0	32	0
Mirza_zaza	150	2	0	0	0	699	0	0	0	0	0	0	0	851	9	2	0	0	0	64	0	0	0	0	0	1	0	76	927	2	0	0	0	0	2	0	0	0	0	0	0	4	9	0	0	0	0	99	1
Microcebus_sp_3_GT-2019	150	2	0	0	0	690	1	0	0	0	0	0	0	843	3	1	0	0	0	62	0	0	0	0	0	0	0	66	909	0	0	0	0	0	1	0	0	0	0	0	0	1	15	0	0	0	0	108	0
Microcebus_tavaratra	157	1	0	0	0	684	1	0	0	0	0	0	0	843	4	1	0	0	0	60	0	0	0	0	0	0	0	65	908	0	0	0	0	0	2	0	0	0	0	0	0	2	16	3	0	0	0	116	1
Microcebus_mittermeieri	154	1	0	0	0	739	1	0	0	0	0	0	0	895	10	1	0	0	0	69	0	0	0	0	0	0	0	80	975	0	0	0	0	0	0	0	0	0	0	0	0	0	32	1	0	0	0	178	0
Microcebus_ravelobensis	146	1	0	0	0	652	1	0	0	0	0	0	0	800	7	1	0	0	0	68	0	0	0	0	0	0	0	76	876	0	0	0	0	0	0	0	0	0	0	0	0	0	26	0	0	0	0	90	0
Microcebus_griseorufus	155	2	0	0	0	697	1	0	0	0	0	0	0	855	12	1	0	0	0	71	0	0	0	0	0	0	0	84	939	0	0	0	0	0	4	0	0	0	0	0	0	4	44	2	0	0	0	161	0
Burhinus_oedicnemus	3	0	0	0	0	90	0	0	0	0	0	1	0	94	0	0	0	0	0	17	0	0	0	0	0	0	0	17	111	0	0	0	0	0	46	0	0	0	0	0	0	46	1	0	0	0	0	38	0
Datnioides_undecimradiatus	0	3	50	7	26	0	1	1	0	0	0	1	8	97	0	0	13	0	4	1	0	1	0	0	0	0	2	21	118	0	0	0	0	0	0	0	0	0	0	0	0	0	0	4	14	0	8	0	0
Carassius_auratus_red_var	0	9	66	12	30	1	2	1	0	0	0	3	30	154	0	1	1	0	3	0	1	1	0	0	0	0	13	20	174	0	1	6	0	0	0	0	0	0	0	0	0	7	0	1	18	4	4	0	0
Ompok_bimaculatus	0	16	49	20	45	0	2	1	0	0	0	2	22	157	0	2	2	0	0	0	0	0	0	0	0	0	5	9	166	0	0	0	0	0	0	0	0	0	0	0	0	0	0	0	3	5	0	0	0
Sander_vitreus	0	2	45	1	8	0	1	0	0	0	0	1	5	63	0	0	13	1	8	3	0	1	0	0	0	0	0	26	89	0	0	0	0	0	0	0	0	0	0	0	0	0	0	2	99	3	24	2	0
Spea_multiplicata	32	11	16	15	5	696	1	0	0	0	0	2	0	778	1	1	0	0	1	234	0	0	0	0	0	0	0	237	1015	0	0	0	0	0	2	0	0	0	0	0	0	2	0	1	0	0	0	51	0
Scaphiopus_couchii	0	0	0	0	0	5	0	0	0	0	0	1	0	6	1	0	0	0	0	9	0	0	0	0	0	0	0	10	16	0	0	0	0	0	0	0	0	0	0	0	0	0	28	9	9	9	7	725	1
Scaphiopus_holbrookii	4	0	0	0	1	36	0	0	0	0	0	1	0	42	2	1	0	0	1	44	0	0	0	0	0	0	0	48	90	0	0	0	0	0	0	0	0	0	0	0	0	0	55	9	17	12	9	1284	2
Spea_bombifrons	5	0	0	0	0	40	0	0	0	0	0	0	0	45	0	0	0	3	0	52	0	0	0	0	0	0	0	55	100	0	0	0	0	0	0	0	0	0	0	0	0	0	35	20	31	14	17	1074	2
Anthochaera_phrygia	0	0	0	0	0	1	0	0	0	0	0	0	0	1	0	0	0	0	0	0	0	0	0	0	0	0	0	0	1	3	0	0	0	0	9	0	0	0	0	1	0	13	3	0	0	0	0	7	0
Ursus_thibetanus_thibetanus	163	2	0	0	0	889	1	0	0	0	0	0	0	1055	14	0	0	0	0	118	0	0	0	0	0	0	0	132	1187	4	0	0	0	0	39	0	0	0	0	0	0	43	39	0	0	0	0	275	0
Lophius_piscatorius	0	2	14	0	8	0	1	1	0	0	0	1	1	28	0	0	1	0	0	0	0	0	0	0	0	0	0	1	29	0	0	0	0	0	0	0	0	0	0	0	0	0	0	0	0	0	19	0	0
Gambusia_holbrooki	0	5	44	5	26	0	1	0	0	0	0	1	9	91	0	5	11	0	2	0	0	3	0	0	0	0	1	22	113	0	0	0	0	0	0	0	0	0	0	0	0	0	0	10	119	6	8	0	0
Hemignathus_wilsoni	2	0	0	0	0	14	0	0	0	0	0	1	0	17	1	0	0	0	0	9	0	0	0	0	0	0	0	10	27	0	0	0	0	0	4	0	0	0	0	0	0	4	2	0	0	0	0	8	0
Chionodraco_myersi	0	1	127	3	23	0	1	0	0	0	0	1	6	162	0	0	11	0	4	1	0	0	0	0	0	0	0	16	178	0	0	0	0	0	0	0	0	0	0	0	0	0	0	0	3	0	1	0	0
Chionodraco_hamatus	0	1	10	2	1	0	1	0	0	0	0	1	1	17	0	0	3	0	3	1	0	0	0	0	0	0	1	8	25	0	0	11	0	5	0	0	0	0	0	0	1	17	0	0	15	0	2	0	0
Oreamnos_americanus	72	1	0	0	0	508	1	0	0	0	0	0	0	582	12	0	0	0	0	81	0	0	0	0	0	0	0	93	675	8	0	0	0	0	57	0	0	0	0	0	0	65	22	0	0	0	0	112	0
Sapajus_apella	85	0	0	0	0	307	0	0	0	0	0	1	0	393	9	1	0	0	0	40	0	0	0	0	0	0	0	50	443	0	0	0	0	0	3	0	0	0	0	0	0	3	2	0	0	0	0	18	0
Trachypithecus_francoisi	28	0	0	0	0	188	0	0	0	0	0	1	0	217	15	0	0	0	0	42	0	0	0	0	0	0	0	57	274	0	0	0	0	0	0	0	0	0	0	0	0	0	0	0	0	0	0	0	0
Eremophila_alpestris_peregrina	3	0	0	0	0	20	0	0	0	0	0	1	0	24	0	0	0	0	0	4	0	0	0	0	0	0	0	4	28	0	0	0	0	0	16	0	0	0	0	0	0	16	0	0	0	0	0	11	0
Cynopterus_brachyotis	65	1	0	0	0	329	0	0	0	0	0	0	0	395	11	0	0	0	0	30	0	0	0	0	0	0	0	41	436	4	0	0	0	0	27	1	0	0	0	0	0	32	17	0	0	0	0	90	0
Oophaga_pumilio	11	2	4	4	6	395	1	0	0	0	0	3	0	426	3	0	1	1	1	81	0	0	0	0	0	0	0	87	513	0	1	0	0	0	50	0	0	0	0	0	0	51	0	1	0	0	3	38	0
Tetrax_tetrax	12	0	0	0	0	102	0	0	0	0	0	1	0	115	1	0	0	0	0	43	0	0	0	0	0	0	0	44	159	0	0	0	0	0	31	0	0	0	0	0	0	31	0	0	0	0	0	154	0
Sialia_sialis	3	0	0	0	0	15	0	0	0	0	0	1	0	19	0	0	0	0	0	1	0	0	0	0	0	0	0	1	20	0	0	0	0	0	9	0	0	0	0	0	0	9	0	0	0	0	0	8	0
Nymphicus_hollandicus	5	0	0	0	0	19	0	0	0	0	0	0	0	24	0	0	0	0	0	7	0	0	0	0	0	0	0	7	31	0	0	0	0	0	0	0	0	0	0	0	0	0	4	0	0	0	0	55	0
Rhizomys_pruinosus	122	1	0	0	0	1030	1	0	0	0	0	0	0	1154	16	0	0	0	0	180	0	0	0	0	0	0	0	196	1350	1	1	0	0	0	31	0	0	0	0	0	0	33	0	0	0	0	0	12	0
Hylobates_moloch	43	1	0	0	0	196	0	0	0	0	0	1	0	241	7	0	0	0	0	35	0	0	0	0	0	0	0	42	283	1	0	0	0	0	4	0	0	0	0	0	0	5	5	0	0	0	0	16	0
Aratinga_weddellii	5	0	0	0	0	26	0	0	0	0	0	1	0	32	3	0	0	0	0	3	0	0	0	0	0	0	0	6	38	0	0	0	0	0	0	0	0	0	0	0	0	0	0	0	0	0	0	21	0
Psittacus_erithacus	4	0	0	0	0	21	0	0	0	0	0	1	0	26	1	0	0	0	0	11	0	0	0	0	0	0	0	12	38	0	0	0	0	0	0	0	0	0	0	0	0	0	0	0	0	0	0	14	0
Psittacus_timneh	4	0	0	0	0	23	0	0	0	0	0	1	0	28	1	0	0	0	0	7	0	0	0	0	0	0	0	8	36	0	0	0	0	0	0	0	0	0	0	0	0	0	3	0	0	0	0	27	0
Culter_alburnus	0	10	78	5	28	2	1	1	0	0	0	2	30	157	0	2	6	2	0	0	1	0	0	0	0	0	14	25	182	0	0	2	2	0	1	0	0	0	0	0	4	9	0	0	1	0	0	0	0
Anodorhynchus_hyacinthinus	5	0	0	0	0	28	0	0	0	0	0	1	0	34	1	0	0	0	0	4	0	0	0	0	0	0	0	5	39	0	0	0	0	0	0	0	0	0	0	0	0	0	0	0	0	0	0	64	0
Gymnarchus_niloticus	0	3	14	4	6	0	2	0	0	0	0	1	8	38	0	0	6	0	1	0	0	0	0	0	0	1	3	11	49	0	0	1	0	0	0	0	0	0	0	0	0	1	0	2	32	7	22	1	0
Ara_chloropterus	4	0	0	0	0	27	0	0	0	0	0	0	0	31	1	0	0	0	0	5	0	0	0	0	0	1	0	7	38	0	0	0	0	0	0	0	0	0	0	0	0	0	3	0	0	0	0	14	0
Ara_ararauna	5	0	0	0	0	28	0	0	0	0	0	1	0	34	1	0	0	0	0	3	0	0	0	0	0	0	0	4	38	0	0	0	0	0	0	0	0	0	0	0	0	0	0	0	0	0	0	10	0
Pyrrhura_frontalis	5	0	0	0	0	30	0	0	0	0	0	1	0	36	0	0	0	0	0	1	0	0	0	0	0	0	0	1	37	0	0	0	0	0	0	0	0	0	0	0	0	0	0	0	0	0	0	33	0
Psitteuteles_goldiei	5	0	0	0	0	18	0	0	0	0	0	1	0	24	0	0	0	0	0	4	0	0	0	0	0	0	0	4	28	0	0	0	0	0	7	0	0	0	0	0	0	7	0	0	0	0	0	92	0
Lorius_garrulus	5	0	0	0	0	22	0	0	0	0	0	1	0	28	0	0	0	0	0	8	0	0	0	0	0	0	0	8	36	0	0	0	0	0	0	0	0	0	0	0	0	0	0	0	0	0	0	4	0
Syngnathus_floridae	0	0	9	0	4	0	0	0	0	0	0	1	0	14	0	1	1	0	1	0	0	0	0	0	0	0	1	4	18	0	0	1	0	1	0	0	0	0	0	0	0	2	0	0	13	3	1	2	0
Pyrrhura_griseipectus	5	0	0	0	0	30	0	0	0	0	0	1	0	36	0	0	0	0	0	4	0	0	0	0	0	0	0	4	40	0	0	0	0	0	4	0	0	0	0	0	0	4	0	0	0	0	0	62	0
Lophochroa_leadbeateri	5	0	0	0	0	20	0	0	0	0	0	1	0	26	0	0	0	0	0	5	0	0	0	0	0	0	0	5	31	0	0	0	0	0	1	0	0	0	0	0	0	1	0	0	2	0	1	17	0
Lontra_canadensis	111	0	0	0	0	572	1	0	0	0	0	0	0	684	12	0	0	0	0	78	0	0	0	0	0	0	0	90	774	0	0	0	0	0	7	0	0	0	0	0	0	7	3	0	0	0	0	48	0
Ara_militaris	5	0	0	0	0	15	0	0	0	0	0	0	0	20	1	0	0	0	0	3	0	0	0	0	0	0	0	4	24	0	0	0	0	0	0	0	0	0	0	0	0	0	0	1	1	0	0	58	0
Spheniscus_magellanicus	6	0	0	0	0	37	0	0	0	0	0	1	0	44	1	0	0	0	0	7	0	0	0	0	0	0	0	8	52	0	0	0	0	0	5	0	0	0	0	0	0	5	0	0	0	0	0	10	0
Spheniscus_humboldti	5	0	0	0	0	38	0	0	0	0	0	1	0	44	3	0	0	0	0	10	0	0	0	0	0	0	0	13	57	0	0	0	0	0	16	0	0	0	0	0	0	16	0	0	0	0	0	32	0
Spheniscus_demersus	6	0	0	0	0	107	0	0	0	0	0	1	0	114	1	0	0	0	0	28	0	0	0	0	0	0	0	29	143	0	0	0	0	0	2	0	0	0	0	0	0	2	0	0	0	0	0	54	0
Pygoscelis_antarcticus	5	0	0	0	0	71	0	0	0	0	0	1	0	77	3	0	0	0	0	29	0	0	0	0	0	0	0	32	109	1	0	0	0	0	4	0	0	0	0	0	0	5	0	0	0	0	0	38	0
Eudyptes_sclateri	4	0	0	0	0	27	0	0	0	0	0	1	0	32	3	0	0	0	0	12	0	0	0	0	0	0	0	15	47	0	0	0	0	0	1	0	0	0	0	0	0	1	1	0	0	0	0	7	0
Megadyptes_antipodes_antipodes	6	0	0	0	0	54	0	0	0	0	0	1	0	61	3	0	0	0	0	23	0	0	0	0	0	0	0	26	87	0	0	0	0	0	3	0	0	0	0	0	0	3	0	0	0	0	0	28	0
Eudyptula_novaehollandiae	8	0	0	0	0	107	0	0	0	0	0	1	0	116	2	0	0	0	0	51	0	0	0	0	0	0	0	53	169	0	0	0	0	0	11	0	0	0	0	0	0	11	0	0	0	0	0	90	0
Eudyptula_minor	7	0	0	0	0	78	0	0	0	0	0	1	0	86	2	0	0	0	0	29	0	0	0	0	0	0	0	31	117	0	0	0	0	0	4	0	0	0	0	0	0	4	0	0	0	0	0	75	0
Eudyptes_schlegeli	5	0	0	0	0	25	0	0	0	0	0	1	0	31	3	0	0	0	0	6	0	0	0	0	0	0	0	9	40	0	0	0	0	0	11	0	0	0	0	0	0	11	0	0	0	0	0	9	0
Eudyptula_albosignata	8	0	0	0	0	110	0	0	0	0	0	1	0	119	2	0	0	0	0	51	0	0	0	0	0	0	0	53	172	0	0	0	0	0	7	0	0	0	0	0	0	7	0	0	0	0	0	96	0
Eudyptes_moseleyi	6	0	0	0	0	22	0	0	0	0	0	1	0	29	1	0	0	0	0	9	0	0	0	0	0	0	0	10	39	1	0	0	0	0	4	0	0	0	0	0	0	5	4	0	0	0	0	16	0
Eudyptes_chrysolophus	4	0	0	0	0	82	0	0	0	0	0	1	0	87	2	0	0	0	0	28	0	0	0	0	0	0	0	30	117	0	0	0	0	0	5	0	0	0	0	0	0	5	0	0	0	0	0	39	0
Eudyptes_robustus	5	0	0	0	0	28	0	0	0	0	0	1	0	34	3	0	0	0	0	10	0	0	0	0	0	0	0	13	47	0	0	0	0	0	4	0	0	0	0	0	0	4	1	0	0	0	0	6	0
Eudyptes_pachyrhynchus	5	0	0	0	0	25	0	0	0	0	0	1	0	31	2	0	0	0	0	11	0	0	0	0	0	0	0	13	44	0	0	0	0	0	1	0	0	0	0	0	0	1	1	0	0	0	0	9	0
Eudyptes_chrysocome	5	0	0	0	0	25	0	0	0	0	0	1	0	31	3	0	0	0	0	16	0	0	0	0	0	0	0	19	50	1	0	0	0	0	3	0	0	0	0	0	0	4	1	0	0	0	0	10	0
Eudyptes_filholi	6	0	0	0	0	25	0	0	0	0	0	1	0	32	2	0	0	0	0	13	0	0	0	0	0	0	0	15	47	0	0	0	0	0	0	0	0	0	0	0	0	0	1	0	0	0	0	3	0
Aptenodytes_patagonicus	7	0	0	0	0	44	0	0	0	0	0	1	0	52	5	0	0	0	0	19	0	0	0	0	0	0	0	24	76	0	0	0	0	0	2	0	0	0	0	0	0	2	0	0	0	0	0	16	0
Pygoscelis_papua	6	0	0	0	0	62	0	0	0	0	0	1	0	69	4	0	0	0	0	19	0	0	0	0	0	0	0	23	92	0	0	0	0	0	3	0	0	0	0	0	0	3	0	0	0	0	0	26	0
Rhombomys_opimus	82	0	0	0	0	508	0	0	0	0	0	0	0	590	8	2	0	0	0	63	0	0	0	0	0	0	0	73	663	3	0	0	0	0	40	0	0	0	0	0	0	43	2	0	0	0	0	18	0
Poeciliopsis_turrubarensis	0	3	46	6	15	0	1	1	0	0	0	1	7	80	0	0	3	0	1	0	0	0	0	0	0	0	0	4	84	0	0	3	0	0	0	0	0	0	0	0	0	3	0	0	13	0	4	0	0
Poeciliopsis_retropinna	0	4	54	6	26	0	1	2	0	0	0	1	7	101	0	1	6	0	2	0	0	0	0	0	0	0	4	13	114	0	0	0	0	0	0	0	0	0	0	0	0	0	0	0	0	0	0	0	0
Bubo_bubo	11	0	0	0	0	53	0	0	0	0	0	1	0	65	1	0	0	0	0	14	0	0	0	0	0	0	0	15	80	0	0	0	0	0	30	0	0	0	0	0	0	30	0	0	0	0	0	42	0
Buteo_japonicus	11	0	0	0	0	34	0	0	0	0	0	1	0	46	0	0	0	0	0	3	0	0	0	0	0	0	0	3	49	0	0	0	0	0	15	0	0	0	0	0	0	15	0	0	0	0	0	24	0
Otus_sunia	11	0	0	0	0	40	0	0	0	0	0	1	0	52	0	0	0	0	0	6	0	0	0	0	0	0	0	6	58	0	0	0	0	0	3	0	0	0	0	0	0	3	1	0	0	0	0	254	0
Protosalanx_chinensis	0	2	70	9	16	1	1	0	0	0	0	2	3	104	0	0	2	0	1	0	0	0	0	0	0	0	1	4	108	0	0	1	0	0	0	0	0	0	0	0	0	1	0	0	4	0	0	0	0
Poeciliopsis_occidentalis	0	4	52	3	26	0	1	1	0	0	0	1	8	96	0	0	13	1	1	0	0	0	0	0	0	0	1	16	112	0	0	0	0	1	0	0	0	0	0	0	0	1	0	0	8	2	2	0	0
Limnodynastes_dumerilii	17	9	37	21	22	769	1	0	0	0	0	3	0	879	1	1	1	0	7	114	0	0	0	0	0	0	0	124	1003	0	2	0	0	1	25	0	0	0	0	0	0	28	9	0	5	4	6	183	0
Pterocles_orientalis	6	0	0	0	0	43	0	0	0	0	0	1	0	50	1	0	0	0	0	17	0	0	0	0	0	0	0	18	68	2	0	0	0	0	10	0	0	0	0	0	0	12	0	0	0	0	0	33	0
Melospiza_melodia_maxima	1	0	0	0	0	16	0	0	0	0	0	1	0	18	0	0	0	0	0	3	0	0	0	0	0	0	0	3	21	1	0	0	0	0	25	0	0	0	0	0	0	26	0	0	0	0	0	31	0
Melanerpes_aurifrons	1	0	0	0	0	42	0	0	0	0	0	1	0	44	0	0	0	0	0	11	0	0	0	0	0	0	0	11	55	0	0	0	0	0	0	0	0	0	0	0	0	0	0	0	0	0	0	2	0
Cynomys_gunnisoni	140	1	0	0	0	999	1	0	0	0	0	1	0	1142	11	1	0	0	0	150	0	0	0	0	0	0	0	162	1304	0	0	0	0	0	0	0	0	0	0	0	0	0	0	0	0	0	0	14	0
Eupsittula_pertinax	5	0	0	0	0	26	0	0	0	0	0	1	0	32	1	0	0	0	0	11	0	0	0	0	0	0	0	12	44	0	0	0	0	0	0	0	0	0	0	0	0	0	0	0	0	0	0	24	0
Clarias_macrocephalus	0	12	86	15	52	0	2	1	0	0	0	2	19	189	0	1	5	0	3	0	0	0	0	0	0	0	8	17	206	0	0	0	0	0	0	0	0	0	0	0	0	0	0	0	4	0	4	0	0
Gymnobelideus_leadbeateri	164	3	0	0	0	709	0	0	0	0	0	2	0	878	12	0	0	0	0	50	0	0	0	0	0	0	0	62	940	0	0	0	0	0	0	0	0	0	0	0	0	0	1	0	0	0	0	3	0
Aeorestes_cinereus	84	1	0	0	0	239	1	0	0	0	0	0	0	325	3	0	0	0	0	21	0	0	0	0	0	0	0	24	349	0	0	0	0	0	8	0	0	0	0	0	0	8	0	0	0	0	0	11	0
Pontoporia_blainvillei	1	0	0	0	0	13	0	0	0	0	0	0	0	14	2	0	0	0	0	19	0	0	0	0	0	0	0	21	35	0	0	0	0	0	3	0	0	0	0	0	0	3	0	0	0	0	0	15	2
Pionus_senilis	2	0	0	0	0	16	0	0	0	0	0	0	0	18	1	0	0	0	0	8	0	0	0	0	0	0	0	9	27	0	0	0	0	0	0	0	0	0	0	0	0	0	4	0	0	0	0	29	0
Pyrrhura_molinae	5	0	0	0	0	28	0	0	0	0	0	1	0	34	0	0	0	0	0	6	0	0	0	0	0	0	0	6	40	0	0	0	0	0	0	0	0	0	0	0	0	0	0	0	0	0	0	24	0
Pyrrhura_perlata	5	0	0	0	0	29	0	0	0	0	0	1	0	35	0	0	0	0	0	1	0	0	0	0	0	0	0	1	36	0	0	0	0	0	7	0	0	0	0	0	0	7	0	0	0	0	0	60	0
Lythrypnus_dalli	0	0	28	3	9	0	0	0	0	0	0	0	1	41	0	1	6	0	9	0	0	0	0	0	0	0	0	16	57	0	0	0	0	0	0	0	0	0	0	0	0	0	0	1	13	0	11	2	0
Mormyrus_iriodes	0	2	10	3	7	0	2	1	0	0	0	2	4	31	0	1	6	1	2	0	0	0	0	0	0	0	3	13	44	0	0	0	0	0	0	0	0	0	0	0	0	0	0	2	10	2	9	0	0
Eclectus_roratus	5	0	0	0	0	24	0	0	0	0	0	1	0	30	0	0	0	0	0	4	0	0	0	0	0	0	0	4	34	0	0	0	0	0	5	0	0	0	0	0	0	5	0	0	1	0	0	52	0
Mustela_putorius_furo	170	1	0	0	0	774	1	0	0	0	0	0	0	946	9	1	0	0	0	77	0	0	0	0	0	0	0	87	1033	0	0	0	0	0	0	0	0	0	0	0	0	0	0	0	0	0	0	0	0
Guaruba_guarouba	5	0	0	0	0	25	0	0	0	0	0	1	0	31	1	0	0	0	0	2	0	0	0	0	0	0	0	3	34	0	0	0	0	0	7	0	0	0	0	0	0	7	0	0	0	0	0	68	0
Mirounga_leonina	29	0	0	0	0	247	1	0	0	0	0	0	0	277	11	1	0	0	0	61	0	0	0	0	0	0	0	73	350	0	0	0	0	0	9	0	0	0	0	0	0	9	0	0	0	0	0	13	0
Ardeotis_arabs	12	0	0	0	0	69	0	0	0	0	0	1	0	82	2	0	0	0	0	43	0	0	0	0	0	0	0	45	127	0	0	0	0	0	13	0	0	0	0	0	0	13	1	0	0	0	0	197	0
Dissostichus_mawsoni	0	1	46	2	22	0	1	1	0	0	0	0	5	78	0	0	40	1	15	1	0	0	0	0	0	1	3	61	139	0	0	0	0	1	0	0	0	0	0	0	0	1	0	0	0	0	1	0	0
Hydrolagus_affinis	0	0	0	0	1	0	1	0	0	0	0	3	0	5	1	0	1	0	0	0	0	0	0	0	0	0	0	2	7	0	0	0	0	0	0	0	0	0	0	0	0	0	0	0	0	0	0	0	0
Aquila_chrysaetos_japonica	12	0	0	0	0	30	0	0	0	0	0	1	0	43	1	0	0	0	0	6	0	0	0	0	0	0	0	7	50	0	0	0	0	0	12	0	0	0	0	0	0	12	0	0	0	0	0	21	0
Fukomys_damarensis	94	1	0	0	0	1028	0	0	0	0	0	1	0	1124	6	0	0	0	0	182	0	0	0	0	0	0	0	188	1312	3	0	0	0	0	24	0	0	0	0	0	0	27	6	0	0	0	0	280	0
Halichoerus_grypus	28	0	0	0	0	366	1	0	0	0	0	0	0	395	11	0	0	0	0	73	0	0	0	0	0	0	0	84	479	0	0	0	0	0	0	0	0	0	0	0	0	0	0	0	0	0	0	1	0
Nisaetus_nipalensis	13	0	0	0	0	34	0	0	0	0	0	1	0	48	0	0	0	0	0	5	0	0	0	0	0	0	0	5	53	0	0	0	0	0	13	0	0	0	0	0	0	13	0	0	0	0	0	42	0
Grus_monacha	8	0	0	0	0	46	0	0	0	0	0	1	0	55	1	0	0	0	0	9	0	0	0	0	0	0	0	10	65	1	0	0	0	0	3	0	0	0	0	0	0	4	5	0	0	0	0	42	0
Antigone_vipio	12	0	0	0	0	52	0	0	0	0	0	1	0	65	1	0	0	0	0	5	0	0	0	0	0	0	0	6	71	0	0	0	0	0	11	0	0	0	0	0	0	11	2	0	0	0	0	31	0
Martes_zibellina	158	2	0	0	0	731	1	0	0	0	0	0	0	892	17	0	0	0	0	80	0	0	0	0	0	0	0	97	989	1	0	0	0	0	32	0	0	0	0	0	0	33	5	0	0	0	0	30	0
Ptyas_mucosa	26	0	0	0	0	477	1	0	0	0	0	1	0	505	1	4	0	0	0	58	0	0	0	0	0	0	0	63	568	1	0	0	0	0	11	0	0	0	0	0	0	12	0	0	0	0	0	42	0
Pantherophis_obsoletus	28	0	0	0	0	442	1	0	0	0	0	1	0	472	0	2	0	0	0	52	0	0	0	0	0	0	0	54	526	0	0	0	0	0	11	0	0	0	0	0	0	11	0	0	0	0	0	32	0
Trematomus_loennbergii	0	0	68	2	20	0	0	1	0	0	0	1	2	94	0	0	35	0	5	1	1	1	0	0	0	0	1	44	138	0	0	0	0	0	0	0	0	0	0	0	0	0	0	0	0	0	0	0	0
Capreolus_pygargus	124	1	0	0	0	711	1	0	0	0	0	0	0	837	11	1	0	0	0	130	0	0	0	0	0	0	0	142	979	4	0	0	0	0	41	0	0	0	0	0	0	45	19	0	0	0	0	311	0
Labeo_catla	0	16	88	27	49	1	2	1	0	0	0	2	48	234	0	1	5	1	2	0	0	0	0	0	0	0	10	19	253	0	0	0	0	0	0	0	0	0	0	0	0	0	0	0	0	0	0	0	0
Acipenser_oxyrinchus_oxyrinchus	1	1	0	1	5	2	2	0	0	0	0	2	2	16	0	0	2	0	0	2	0	0	0	0	0	0	1	5	21	0	0	0	0	0	0	0	0	0	0	0	0	0	3	6	28	0	19	4	0
Turdus_rufiventris	3	0	0	0	0	13	0	0	0	0	0	1	0	17	1	0	0	0	0	2	0	0	0	0	0	0	0	3	20	0	0	0	0	0	3	0	0	0	0	0	0	3	0	0	0	0	0	5	0
Lama_glama_chaku	83	2	0	0	0	501	1	0	0	0	0	0	0	587	6	0	0	0	0	77	0	0	0	0	0	0	0	83	670	0	0	0	0	0	13	0	0	0	0	0	0	13	5	0	0	0	0	210	0
Lama_guanicoe_cacsilensis	79	2	0	0	0	522	1	0	0	0	0	0	0	604	7	0	0	0	0	101	0	0	0	0	0	0	0	108	712	2	0	0	0	0	18	0	0	0	0	0	0	20	6	0	0	0	0	179	0
Vicugna_vicugna_mensalis	83	2	0	0	0	520	1	0	0	0	0	0	0	606	6	0	0	0	0	92	0	0	0	0	0	0	0	98	704	0	0	0	0	0	15	0	0	0	0	0	0	15	3	0	0	0	0	24	0
Menidia_beryllina	0	1	44	8	14	0	1	0	0	0	0	1	0	69	0	0	3	0	5	1	0	1	0	0	0	0	2	12	81	0	0	0	0	1	0	0	0	0	0	0	0	1	0	0	43	0	23	0	0
Fulica_atra	6	0	0	0	0	577	0	0	0	0	0	1	0	584	1	0	0	0	0	132	0	0	0	0	0	0	0	133	717	0	0	0	0	0	26	0	0	0	0	0	0	26	2	0	0	0	0	149	0
Percina_caprodes	0	5	197	10	12	1	1	1	0	0	0	1	5	233	0	0	32	1	3	3	0	0	0	0	0	0	0	39	272	0	0	0	0	0	0	0	0	0	0	0	0	0	0	0	1	0	0	0	0
Cygnus_atratus	13	0	0	0	0	167	0	0	0	0	0	1	0	181	0	0	0	0	0	37	0	0	0	0	0	0	0	37	218	0	0	0	0	0	0	0	0	0	0	0	0	0	0	0	0	0	0	5	0
Crypturellus_undulatus	19	0	0	0	0	60	0	0	0	0	0	1	0	80	2	0	0	0	0	11	0	0	0	0	0	0	0	13	93	3	0	0	0	0	21	0	0	0	0	0	0	24	6	0	0	0	0	43	0
Crypturellus_soui	19	0	0	0	0	38	0	0	0	0	0	1	0	58	0	0	0	0	0	16	0	0	0	0	0	0	0	16	74	3	0	0	0	0	11	0	0	0	0	0	0	14	14	0	0	0	0	18	0
Piaya_cayana	5	0	0	0	0	26	0	0	0	0	0	1	0	32	0	0	0	0	0	5	0	0	0	0	0	0	0	5	37	0	0	0	0	0	12	0	0	0	0	0	0	12	1	0	0	0	0	32	0
Geococcyx_californianus	4	0	0	0	0	17	0	0	0	0	0	0	0	21	0	0	0	0	0	1	0	0	0	0	0	0	0	1	22	0	0	0	0	0	1	0	0	0	0	0	0	1	3	0	0	0	0	12	0
Sula_dactylatra	5	0	0	0	0	21	0	0	0	0	0	1	0	27	3	0	0	0	0	3	0	0	0	0	0	0	0	6	33	0	0	0	0	0	3	0	0	0	0	0	0	3	1	0	0	0	0	8	0
Aegithalos_caudatus	3	0	0	0	0	10	0	0	0	0	0	1	0	14	0	0	0	0	0	3	0	0	0	0	0	0	0	3	17	0	0	0	0	0	4	0	0	0	0	0	0	4	0	0	0	0	0	4	0
Fregata_magnificens	8	0	0	0	0	48	0	0	0	0	0	1	0	57	1	1	0	0	0	15	0	0	0	0	0	0	0	17	74	0	0	0	0	0	3	0	0	0	0	0	0	3	0	0	0	0	0	8	0
Todus_mexicanus	6	0	0	0	0	18	0	0	0	0	0	1	0	25	0	0	0	0	0	3	0	0	0	0	0	0	0	3	28	0	0	0	0	0	6	0	0	0	0	0	0	6	5	0	0	0	0	21	0
Dryoscopus_gambensis	6	0	0	0	0	13	0	0	0	0	0	1	0	20	1	0	0	0	0	3	0	0	0	0	0	0	0	4	24	1	0	0	0	0	3	0	0	0	0	0	0	4	1	0	0	0	0	6	0
Calyptomena_viridis	3	0	0	0	0	16	0	0	0	0	0	1	0	20	0	0	0	0	0	0	0	0	0	0	0	0	0	0	20	0	0	0	0	0	1	0	0	0	0	0	0	1	0	0	0	0	0	5	0
Pitta_sordida	4	0	0	0	0	15	0	0	0	0	0	1	0	20	0	0	0	0	0	1	0	0	0	0	0	0	0	1	21	0	0	0	0	0	35	0	0	0	0	0	0	35	0	0	0	0	0	36	0
Picathartes_gymnocephalus	5	0	0	0	0	11	0	0	0	0	0	1	0	17	0	0	0	0	0	3	0	0	0	0	0	0	0	3	20	0	0	0	0	0	1	0	0	0	0	0	0	1	0	0	0	0	0	5	0
Chloropsis_hardwickii	5	0	0	0	0	13	0	0	0	0	0	1	0	19	0	0	0	0	0	1	0	0	0	0	0	0	0	1	20	0	0	0	0	0	3	0	0	0	0	0	0	3	0	0	0	0	0	4	0
Grus_americana	13	0	0	0	0	56	0	0	0	0	0	1	0	70	2	0	0	0	0	10	0	0	0	0	0	0	0	12	82	0	0	0	0	0	4	0	0	0	0	0	0	4	2	0	0	0	0	18	0
Tichodroma_muraria	3	0	0	0	0	12	0	0	0	0	0	1	0	16	0	0	0	0	0	2	0	0	0	0	0	0	0	2	18	0	0	0	0	0	0	0	0	0	0	0	0	0	0	0	0	0	0	0	0
Hydrodamalis_gigas	11	0	0	0	0	74	1	0	0	0	0	0	0	86	13	0	0	0	0	64	0	0	0	0	0	0	0	77	163	5	0	0	0	0	18	0	0	0	0	0	0	23	40	0	0	0	0	305	0
Menura_novaehollandiae	6	0	0	0	0	17	0	0	0	0	0	1	0	24	1	0	0	0	0	8	0	0	0	0	0	0	0	9	33	0	0	0	0	0	4	0	0	0	0	0	0	4	0	0	0	0	0	17	0
Cochlearius_cochlearius	8	0	0	0	0	94	0	0	0	0	0	1	0	103	0	0	0	0	0	18	0	0	0	0	0	0	0	18	121	1	0	0	0	0	24	0	0	0	0	0	0	25	0	0	0	0	0	47	0
Ardeotis_kori	12	0	0	0	0	38	0	0	0	0	0	1	0	51	0	0	0	0	0	3	0	0	0	0	0	0	0	3	54	1	0	0	0	0	1	0	0	0	0	0	0	2	0	0	0	0	0	12	0
Anhinga_anhinga	6	0	0	0	0	21	0	0	0	0	0	1	0	28	2	0	0	0	0	0	0	0	0	0	0	0	0	2	30	0	0	0	0	0	0	0	0	0	0	0	0	0	0	0	0	0	0	11	0
Lophotis_ruficrista	10	0	0	0	0	42	0	0	0	0	0	1	0	53	0	1	0	0	0	2	0	0	0	0	0	0	0	3	56	0	0	0	0	0	5	0	0	0	0	0	0	5	0	0	0	0	0	5	0
Smithornis_capensis	3	0	0	0	0	28	0	0	0	0	0	1	0	32	0	0	0	0	0	1	0	0	0	0	0	0	0	1	33	1	0	0	0	0	20	0	0	0	0	0	0	21	2	0	0	0	0	57	0
Ptilorrhoa_leucosticta	3	0	0	0	0	12	0	0	0	0	0	1	0	16	2	0	0	0	0	1	0	0	0	0	0	0	0	3	19	0	0	0	0	0	4	0	0	0	0	0	0	4	0	0	0	0	0	0	0
Chunga_burmeisteri	10	0	0	0	0	31	0	0	0	0	0	1	0	42	1	0	0	0	0	3	0	0	0	0	0	0	0	4	46	0	0	0	0	0	2	0	0	0	0	0	0	2	0	0	0	0	0	3	0
Chaetorhynchus_papuensis	8	0	0	0	0	17	0	0	0	0	0	1	0	26	0	0	0	0	0	2	0	0	0	0	0	0	0	2	28	1	0	0	0	0	0	0	0	0	0	0	0	1	0	0	0	0	0	5	0
Tachuris_rubrigastra	5	0	0	0	0	18	0	0	0	0	0	1	0	24	1	0	0	0	0	2	0	0	0	0	0	0	0	3	27	0	0	0	0	0	11	0	0	0	0	0	0	11	0	0	0	0	0	23	0
Rhodinocichla_rosea	3	0	0	0	0	13	0	0	0	0	0	1	0	17	0	0	0	0	0	4	0	0	0	0	0	0	0	4	21	0	0	0	0	0	2	0	0	0	0	0	0	2	0	0	0	0	0	1	0
Nyctibius_bracteatus	7	0	0	0	0	54	0	0	0	0	0	1	0	62	1	0	0	0	0	14	0	0	0	0	0	0	0	15	77	0	0	0	0	0	8	0	0	0	0	0	0	8	0	0	0	0	0	26	0
Oceanites_oceanicus	8	0	0	0	0	42	0	0	0	0	0	0	0	50	0	0	0	0	0	12	0	0	0	0	0	0	0	12	62	0	0	0	0	0	6	0	0	0	0	0	0	6	1	0	0	0	0	26	0
Penelope_pileata	11	0	0	0	0	21	0	0	0	0	0	1	0	33	0	0	0	0	0	3	0	0	0	0	0	0	0	3	36	0	0	0	0	0	10	0	0	0	0	0	0	10	2	0	0	0	0	12	0
Campylorhamphus_procurvoides	4	0	0	0	0	12	0	0	0	0	0	1	0	17	0	0	0	0	0	4	0	0	0	0	0	0	0	4	21	0	0	0	0	0	6	0	0	0	0	0	0	6	0	0	0	0	0	5	0
Eubucco_bourcierii	2	0	0	0	0	26	0	0	0	0	0	1	0	29	0	0	0	0	0	2	0	0	0	0	0	0	0	2	31	0	0	0	0	0	1	0	0	0	0	0	0	1	0	0	0	0	0	7	0
Sakesphorus_luctuosus	4	0	0	0	0	17	0	0	0	0	0	1	0	22	0	0	0	0	0	8	0	0	0	0	0	0	0	8	30	0	0	0	0	0	12	0	0	0	0	0	0	12	0	0	0	0	0	14	0
Ciccaba_nigrolineata	10	0	0	0	0	35	0	0	0	0	0	1	0	46	2	0	0	0	0	3	0	0	0	0	0	0	0	5	51	0	0	0	0	0	10	0	0	0	0	0	0	10	1	0	0	0	0	25	0
Grallaria_varia	7	0	0	0	0	15	0	0	0	0	0	1	0	23	0	0	0	0	0	3	0	0	0	0	0	0	0	3	26	0	0	0	0	0	2	0	0	0	0	0	0	2	0	0	0	0	0	10	0
Sclerurus_mexicanus	7	0	0	0	0	9	0	0	0	0	0	1	0	17	0	0	0	0	0	5	0	0	0	0	0	0	0	5	22	0	0	0	0	0	2	0	0	0	0	0	0	2	0	0	0	0	0	8	0
Cephalopterus_ornatus	7	0	0	0	0	15	0	0	0	0	0	1	0	23	0	0	0	0	0	3	0	0	0	0	0	0	0	3	26	1	0	0	0	0	5	0	0	0	0	0	0	6	0	0	0	0	0	14	0
Corythaeola_cristata	7	0	0	0	0	31	0	0	0	0	0	1	0	39	0	0	0	0	0	10	0	0	0	0	0	0	0	10	49	4	0	0	0	0	4	0	0	0	0	0	0	8	3	0	0	0	0	10	0
Psilopogon_haemacephalus	0	0	0	0	0	34	0	0	0	0	0	1	0	35	0	0	0	0	0	6	0	0	0	0	0	0	0	6	41	1	0	0	0	0	4	0	0	0	0	0	0	5	0	0	0	0	0	15	0
Vireo_altiloquus	6	0	0	0	0	14	0	0	0	0	0	1	0	21	1	0	0	0	0	1	0	0	0	0	0	0	0	2	23	0	0	0	0	0	2	0	0	0	0	0	0	2	0	0	0	0	0	1	0
Loxia_leucoptera	2	0	0	0	0	12	0	0	0	0	0	1	0	15	0	0	0	0	0	2	0	0	0	0	0	0	0	2	17	2	0	0	0	0	4	0	0	0	0	0	0	6	1	0	0	0	0	3	0
Stercorarius_parasiticus	10	0	0	0	0	56	0	0	0	0	0	1	0	67	1	0	0	0	0	9	0	0	0	0	0	0	0	10	77	0	0	0	0	0	3	0	0	0	0	0	0	3	0	0	0	0	0	14	0
Baryphthengus_martii	8	0	0	0	0	24	0	0	0	0	0	1	0	33	0	0	0	0	0	7	0	0	0	0	0	0	0	7	40	0	0	0	0	0	5	0	0	0	0	0	0	5	0	0	0	0	0	6	0
Regulus_satrapa	3	0	0	0	0	11	0	0	0	0	0	1	0	15	0	0	0	0	0	1	0	0	0	0	0	0	0	1	16	0	0	0	0	0	4	0	0	0	0	0	0	4	0	0	0	0	0	3	0
Bucco_capensis	2	0	0	0	0	18	0	0	0	0	0	1	0	21	0	0	0	0	0	3	0	0	0	0	0	0	0	3	24	0	0	0	0	0	0	0	0	0	0	0	0	0	0	0	0	0	0	3	0
Dicaeum_eximium	3	0	0	0	0	11	0	0	0	0	0	1	0	15	0	0	0	0	0	2	0	0	0	0	0	0	0	2	17	0	0	0	0	0	2	0	0	0	0	0	0	2	0	0	0	0	0	1	0
Myiagra_hebetior	8	0	0	0	0	14	0	0	0	0	0	1	0	23	0	0	0	0	0	2	0	0	0	0	0	0	0	2	25	0	0	0	0	0	3	0	0	0	0	0	0	3	0	0	0	0	0	1	0
Oceanodroma_tethys	8	0	0	0	0	26	0	0	0	0	0	1	0	35	2	0	0	0	0	10	0	0	0	0	0	0	0	12	47	0	0	0	0	0	4	0	0	0	0	0	0	4	1	0	0	0	0	37	0
Pachycephala_philippinensis	8	0	0	0	0	15	0	0	0	0	0	1	0	24	0	0	0	0	0	2	0	0	0	0	0	0	0	2	26	0	0	0	0	0	4	0	0	0	0	0	0	4	0	0	0	0	0	6	0
Rhabdornis_inornatus	3	0	0	0	0	15	0	0	0	0	0	1	0	19	1	0	0	0	0	2	0	0	0	0	0	0	0	3	22	0	0	0	0	0	5	0	0	0	0	0	0	5	0	0	0	0	0	4	0
Sterrhoptilus_dennistouni	3	0	0	0	0	12	0	0	0	0	0	1	0	16	1	0	0	0	0	2	0	0	0	0	0	0	0	3	19	0	0	0	0	0	6	0	0	0	0	0	0	6	0	0	0	0	0	17	0
Edolisoma_coerulescens	7	0	0	0	0	16	0	0	0	0	0	1	0	24	2	0	0	0	0	5	0	0	0	0	0	0	0	7	31	0	0	0	0	0	7	0	0	0	0	0	0	7	0	0	0	0	0	5	0
Pachyramphus_minor	6	0	0	0	0	18	0	0	0	0	0	1	0	25	0	0	0	0	0	0	0	0	0	0	0	0	0	0	25	0	0	0	0	0	1	0	0	0	0	0	0	1	0	0	0	0	0	4	0
Irena_cyanogastra	3	0	0	0	0	11	0	0	0	0	0	1	0	15	0	0	0	0	0	2	0	0	0	0	0	0	0	2	17	0	0	0	0	0	0	0	0	0	0	0	0	0	0	0	0	0	0	5	0
Platysteira_castanea	4	0	0	0	0	17	0	0	0	0	0	1	0	22	0	0	0	0	0	0	0	0	0	0	0	0	0	0	22	0	0	0	0	0	1	0	0	0	0	0	0	1	0	0	0	0	0	1	0
Hylia_prasina	2	0	0	0	0	8	0	0	0	0	0	1	0	11	0	0	0	0	0	5	0	0	0	0	0	0	0	5	16	1	0	0	0	0	0	0	0	0	0	0	0	1	0	0	0	0	0	6	0
Lanius_ludovicianus	5	0	0	0	0	13	0	0	0	0	0	1	0	19	2	0	0	0	0	3	0	0	0	0	0	0	0	5	24	0	0	0	0	0	1	0	0	0	0	0	0	1	0	0	0	0	0	0	0
Thryothorus_ludovicianus	4	0	0	0	0	12	0	0	0	0	0	1	0	17	1	0	0	0	0	2	0	0	0	0	0	0	0	3	20	0	0	0	0	0	7	0	0	0	0	0	0	7	0	0	0	0	0	15	0
Burhinus_bistriatus	13	0	0	0	0	40	0	0	0	0	0	1	0	54	0	0	0	0	0	8	0	0	0	0	0	0	0	8	62	0	0	0	0	0	2	0	0	0	0	0	0	2	0	0	0	0	0	24	0
Polioptila_caerulea	3	0	0	0	0	12	0	0	0	0	0	1	0	16	0	0	0	0	0	3	0	0	0	0	0	0	0	3	19	0	0	0	0	0	5	0	0	0	0	0	0	5	0	0	0	0	0	5	0
Donacobius_atricapilla	3	0	0	0	0	14	0	0	0	0	0	1	0	18	0	0	0	0	0	1	0	0	0	0	0	0	0	1	19	0	0	0	0	0	6	0	0	0	0	0	0	6	0	0	0	0	0	6	0
Motacilla_alba	3	0	0	0	0	14	0	0	0	0	0	1	0	18	0	0	0	0	0	2	0	0	0	0	0	0	0	2	20	0	0	0	0	0	3	0	0	0	0	0	0	3	0	0	0	0	0	5	0
Toxostoma_redivivum	2	0	0	0	0	17	0	0	0	0	0	1	0	20	1	0	0	0	0	3	0	0	0	0	0	0	0	4	24	0	0	0	0	0	8	0	0	0	0	0	0	8	0	0	0	0	0	23	0
Sinosuthora_webbiana	3	0	0	0	0	13	0	0	0	0	0	1	0	17	1	0	0	0	0	2	0	0	0	0	0	0	0	3	20	0	0	0	0	0	5	0	0	0	0	0	0	5	0	0	0	0	0	8	0
Neopipo_cinnamomea	4	0	0	0	0	13	0	0	0	0	0	1	0	18	0	0	0	0	0	4	0	0	0	0	0	0	0	4	22	0	0	0	0	0	1	0	0	0	0	0	0	1	0	0	0	0	0	13	0
Erythrocercus_mccallii	3	0	0	0	0	9	0	0	0	0	0	1	0	13	0	0	0	0	0	2	0	0	0	0	0	0	0	2	15	0	0	0	0	0	1	0	0	0	0	0	0	1	0	0	0	0	0	2	0
Crotophaga_sulcirostris	11	0	0	0	0	49	0	0	0	0	0	1	0	61	0	0	0	0	0	15	0	0	0	0	0	0	0	15	76	0	0	0	0	0	14	0	0	0	0	0	0	14	0	0	0	0	0	39	0
Furnarius_figulus	8	0	0	0	0	14	0	0	0	0	0	1	0	23	0	0	0	0	0	4	0	0	0	0	0	0	0	4	27	0	0	0	0	0	5	0	0	0	0	0	0	5	0	0	0	0	0	10	0
Mionectes_macconnelli	4	0	0	0	0	15	0	0	0	0	0	1	0	20	0	0	0	0	0	0	0	0	0	0	0	0	0	0	20	0	0	0	0	0	6	0	0	0	0	0	0	6	1	0	0	0	0	9	0
Upupa_epops	2	0	0	0	0	16	0	0	0	0	0	1	0	19	0	0	0	0	0	1	0	0	0	0	0	0	0	1	20	1	0	0	0	0	5	0	0	0	0	0	0	6	0	0	0	0	0	19	0
Pterocles_burchelli	6	0	0	0	0	19	0	0	0	0	0	1	0	26	1	0	0	0	0	2	0	0	0	0	0	0	0	3	29	0	0	0	0	0	5	0	0	0	0	0	0	5	3	0	0	0	0	20	0
Urocynchramus_pylzowi	3	0	0	0	0	11	0	0	0	0	0	1	0	15	1	0	0	0	0	1	0	0	0	0	0	0	0	2	17	1	0	0	0	0	0	0	0	0	0	0	0	1	0	0	0	0	0	1	0
Ptilonorhynchus_violaceus	5	0	0	0	0	13	0	0	0	0	0	1	0	19	0	0	0	0	0	4	0	0	0	0	0	0	0	4	23	0	0	0	0	0	4	0	0	0	0	0	0	4	0	0	0	0	0	14	0
Halcyon_senegalensis	6	0	0	0	0	23	0	0	0	0	0	1	0	30	1	0	0	0	0	2	0	0	0	0	0	0	0	3	33	0	0	0	0	0	5	0	0	0	0	0	0	5	3	0	0	0	0	22	0
Eolophus_roseicapilla	5	0	0	0	0	21	0	0	0	0	0	1	0	27	1	0	0	0	0	8	0	0	0	0	0	0	0	9	36	0	0	0	0	0	0	0	0	0	0	0	0	0	0	0	0	0	0	5	1
Columbina_picui	6	0	0	0	0	33	0	0	0	0	0	1	0	40	1	0	0	0	0	7	0	0	0	0	0	0	0	8	48	0	0	0	0	0	8	0	0	0	0	0	0	8	8	0	0	0	0	31	0
Chroicocephalus_maculipennis	11	0	0	0	0	59	0	0	0	0	0	1	0	71	2	0	0	0	0	8	0	0	0	0	0	0	0	10	81	0	0	0	0	0	2	0	0	0	0	0	0	2	1	0	0	0	0	11	0
Probosciger_aterrimus	5	0	0	0	0	20	0	0	0	0	0	1	0	26	0	0	0	0	0	4	0	0	0	0	0	0	0	4	30	0	0	0	0	0	2	0	0	0	0	0	0	2	0	0	0	0	0	5	0
Centropus_unirufus	6	0	0	0	0	22	0	0	0	0	0	1	0	29	0	0	0	0	0	5	0	0	0	0	0	0	0	5	34	0	0	0	0	0	6	0	0	0	0	0	0	6	2	0	0	0	0	31	0
Calcarius_ornatus	2	0	0	0	0	13	0	0	0	0	0	1	0	16	0	0	0	0	0	2	0	0	0	0	0	0	0	2	18	1	0	0	0	0	2	0	0	0	0	0	0	3	0	0	0	0	0	8	0
Rhagologus_leucostigma	7	0	0	0	0	18	0	0	0	0	0	1	0	26	0	0	0	0	0	5	0	0	0	0	0	0	0	5	31	0	0	0	0	0	0	0	0	0	0	0	0	0	0	0	0	0	0	5	0
Cnemophilus_loriae	4	0	0	0	0	11	0	0	0	0	0	1	0	16	2	0	0	0	0	2	0	0	0	0	0	0	0	4	20	0	0	0	0	0	3	0	0	0	0	0	0	3	0	0	0	0	0	10	0
Eulacestoma_nigropectus	8	0	0	0	0	16	0	0	0	0	0	1	0	25	0	0	0	0	0	2	0	0	0	0	0	0	0	2	27	0	0	0	0	0	2	0	0	0	0	0	0	2	0	0	0	0	0	6	0
Orthonyx_spaldingii	6	0	0	0	0	11	0	0	0	0	0	1	0	18	0	0	0	0	0	2	0	0	0	0	0	0	0	2	20	0	0	0	0	0	2	0	0	0	0	0	0	2	0	0	0	0	0	3	0
Aleadryas_rufinucha	4	0	0	0	0	12	0	0	0	0	0	1	0	17	1	0	0	0	0	2	0	0	0	0	0	0	0	3	20	0	0	0	0	0	0	0	0	0	0	0	0	0	0	0	0	0	0	6	0
Onychorhynchus_coronatus	5	0	0	0	0	16	0	0	0	0	0	1	0	22	0	0	0	0	0	2	0	0	0	0	0	0	0	2	24	0	0	0	0	0	3	0	0	0	0	0	0	3	0	0	0	0	0	5	0
Melanocharis_versteri	7	0	0	0	0	12	0	0	0	0	0	1	0	20	0	0	0	0	0	1	0	0	0	0	0	0	0	1	21	1	0	0	0	0	0	0	0	0	0	0	0	1	0	0	0	0	0	6	0
Struthidea_cinerea	6	0	0	0	0	15	0	0	0	0	0	1	0	22	0	0	0	0	0	4	0	0	0	0	0	0	0	4	26	0	0	0	0	0	1	0	0	0	0	0	0	1	0	0	0	0	0	0	0
Origma_solitaria	7	0	0	0	0	12	0	0	0	0	0	1	0	20	0	0	0	0	0	3	0	0	0	0	0	0	0	3	23	0	0	0	0	0	4	0	0	0	0	0	0	4	0	0	0	0	0	4	0
Daphoenositta_chrysoptera	5	0	0	0	0	12	0	0	0	0	0	1	0	18	0	0	0	0	0	3	0	0	0	0	0	0	0	3	21	0	0	0	0	0	0	0	0	0	0	0	0	0	0	0	0	0	0	0	0
Dasyornis_broadbenti	7	0	0	0	0	10	0	0	0	0	0	1	0	18	2	0	0	0	0	1	0	0	0	0	0	0	0	3	21	0	0	0	0	0	0	0	0	0	0	0	0	0	0	0	0	0	0	5	0
Grantiella_picta	7	0	0	0	0	11	0	0	0	0	0	1	0	19	0	0	0	0	0	2	0	0	0	0	0	0	0	2	21	0	0	0	0	0	2	0	0	0	0	0	0	2	0	0	0	0	0	3	0
Machaerirhynchus_nigripectus	7	0	0	0	0	13	0	0	0	0	0	1	0	21	0	0	0	0	0	1	0	0	0	0	0	0	0	1	22	0	0	0	0	0	2	0	0	0	0	0	0	2	0	0	0	0	0	6	0
Malurus_elegans	5	0	0	0	0	11	0	0	0	0	0	1	0	17	1	0	0	0	0	1	0	0	0	0	0	0	0	2	19	0	0	0	0	0	2	0	0	0	0	0	0	2	0	0	0	0	0	2	0
Oreocharis_arfaki	7	0	0	0	0	14	0	0	0	0	0	1	0	22	1	0	0	0	0	1	0	0	0	0	0	0	0	2	24	0	0	0	0	0	1	0	0	0	0	0	0	1	0	0	0	0	0	4	0
Panurus_biarmicus	3	0	0	0	0	11	0	0	0	0	0	1	0	15	0	0	0	0	0	0	0	0	0	0	0	0	0	0	15	0	0	0	0	0	0	0	0	0	0	0	0	0	0	0	0	0	0	0	0
Ifrita_kowaldi	7	0	0	0	0	15	0	0	0	0	0	1	0	23	1	0	0	0	0	1	0	0	0	0	0	0	0	2	25	0	0	0	0	0	4	0	0	0	0	0	0	4	0	0	0	0	0	7	0
Notiomystis_cincta	4	0	0	0	0	6	0	0	0	0	0	1	0	11	0	0	0	0	0	2	0	0	0	0	0	0	0	2	13	0	0	0	0	0	1	0	0	0	0	0	0	1	0	0	0	0	0	0	0
Rhynochetos_jubatus	9	0	0	0	0	27	0	0	0	0	0	1	0	37	0	0	0	0	0	3	0	0	0	0	0	0	0	3	40	0	0	0	0	0	1	0	0	0	0	0	0	1	1	0	0	0	0	4	0
Falcunculus_frontatus	8	0	0	0	0	16	0	0	0	0	0	1	0	25	1	0	0	0	0	1	0	0	0	0	0	0	0	2	27	0	0	0	0	0	1	0	0	0	0	0	0	1	0	0	0	0	0	2	0
Aegotheles_bennettii	11	0	0	0	0	40	0	0	0	0	0	1	0	52	0	0	0	0	0	4	0	0	0	0	0	0	0	4	56	0	0	0	0	0	3	0	0	0	0	0	0	3	2	0	0	0	0	20	0
Pedionomus_torquatus	10	0	0	0	0	58	0	0	0	0	0	1	0	69	0	0	0	0	0	15	0	0	0	0	0	0	0	15	84	1	0	0	0	0	37	0	0	0	0	0	0	38	0	0	0	0	0	45	0
Climacteris_rufus	4	0	0	0	0	9	0	0	0	0	0	1	0	14	0	0	0	0	0	4	0	0	0	0	0	0	0	4	18	0	0	0	0	0	1	0	0	0	0	0	0	1	0	0	0	0	0	7	0
Caloenas_nicobarica	12	0	0	0	0	57	0	0	0	0	0	1	0	70	0	0	0	0	0	20	0	0	0	0	0	0	0	20	90	0	0	0	0	0	66	0	0	0	0	0	0	66	0	0	0	0	0	69	0
Steatornis_caripensis	11	0	0	0	0	48	0	0	0	0	0	1	0	60	0	0	0	0	0	6	0	0	0	0	0	0	0	6	66	2	0	0	0	0	12	0	0	0	0	0	0	14	2	0	0	0	0	28	0
Promerops_cafer	5	0	0	0	0	9	0	0	0	0	0	1	0	15	0	0	0	0	0	6	0	0	0	0	0	0	0	6	21	0	0	0	0	0	0	0	0	0	0	0	0	0	0	0	0	0	0	0	0
Chionis_minor	8	0	0	0	0	42	0	0	0	0	0	1	0	51	0	1	0	0	0	2	0	0	0	0	0	0	0	3	54	0	0	0	0	0	10	0	0	0	0	0	0	10	2	0	0	0	0	25	0
Nothoprocta_pentlandii	15	0	0	0	0	34	0	0	0	0	0	1	0	50	0	0	0	0	0	3	0	0	0	0	0	0	0	3	53	1	0	0	0	0	5	0	0	0	0	0	0	6	1	0	0	0	0	12	0
Nothoprocta_ornata	18	0	0	0	0	36	0	0	0	0	0	1	0	55	0	0	0	0	0	3	0	0	0	0	0	0	0	3	58	0	0	0	0	0	6	0	0	0	0	0	0	6	1	0	0	0	0	19	0
Nothocercus_nigrocapillus	19	0	0	0	0	48	0	0	0	0	0	1	0	68	0	0	0	0	0	8	0	0	0	0	0	0	0	8	76	0	0	0	0	0	7	0	0	0	0	0	0	7	2	0	0	0	0	30	0
Aphelocoma_coerulescens	6	0	0	0	0	14	0	0	0	0	0	1	0	21	0	0	0	0	0	4	0	0	0	0	0	0	0	4	25	0	0	0	0	0	0	0	0	0	0	0	0	0	0	0	0	0	0	5	0
Pheucticus_melanocephalus	3	0	0	0	0	44	0	0	0	0	0	1	0	48	0	0	0	0	0	29	0	0	0	0	0	0	0	29	77	0	0	0	0	0	13	0	0	0	0	0	0	13	0	0	0	0	0	100	0
Loxia_curvirostra	2	0	0	0	0	13	0	0	0	0	0	1	0	16	1	0	0	0	0	4	0	0	0	0	0	0	0	5	21	0	0	0	0	0	1	0	0	0	0	0	0	1	0	0	0	0	0	3	0
Asarcornis_scutulata	12	0	0	0	0	171	0	0	0	0	0	1	0	184	2	0	0	0	0	45	0	0	0	0	0	0	0	47	231	0	0	0	0	0	14	0	0	0	0	0	0	14	0	0	0	0	0	100	0
Vidua_chalybeata	5	0	0	0	0	15	0	0	0	0	0	1	0	21	0	0	0	0	0	6	0	0	0	0	0	0	0	6	27	0	0	0	0	0	0	0	0	0	0	0	0	0	0	0	0	0	0	3	0
Certhia_familiaris	4	0	0	0	0	43	0	0	0	0	0	1	0	48	0	0	0	0	0	16	0	0	0	0	0	0	0	16	64	0	0	0	0	0	3	0	0	0	0	0	0	3	0	0	0	0	0	48	0
Cercotrichas_coryphoeus	2	0	0	0	0	21	0	0	0	0	0	1	0	24	1	0	0	0	0	8	0	0	0	0	0	0	0	9	33	0	0	0	0	0	8	0	0	0	0	0	0	8	0	0	0	0	0	11	0
Brachypodius_atriceps	3	0	0	0	0	20	0	0	0	0	0	1	0	24	0	0	0	0	0	1	0	0	0	0	0	0	0	1	25	0	0	0	0	0	3	0	0	0	0	0	0	3	0	0	0	0	0	5	0
Copsychus_sechellarum	2	0	0	0	0	20	0	0	0	0	0	1	0	23	0	0	0	0	0	12	0	0	0	0	0	0	0	12	35	0	0	0	0	0	23	0	0	0	0	0	0	23	1	0	0	0	0	25	0
Nesospiza_acunhae	1	0	0	0	0	26	0	0	0	0	0	1	0	28	0	0	0	0	0	12	0	0	0	0	0	0	0	12	40	1	0	0	0	0	10	0	0	0	0	0	0	11	0	0	0	0	0	9	0
Nothocercus_julius	17	0	0	0	0	46	0	0	0	0	0	1	0	64	1	0	0	0	0	17	0	0	0	0	0	0	0	18	82	1	0	0	0	0	6	0	0	0	0	0	0	7	3	0	0	0	0	30	0
Sapayoa_aenigma	7	0	0	0	0	22	0	0	0	0	0	1	0	30	2	0	0	0	0	4	0	0	0	0	0	0	0	6	36	0	0	0	0	0	1	0	0	0	0	0	0	1	0	0	0	0	0	12	0
Elachura_formosa	4	0	0	0	0	8	0	0	0	0	0	1	0	13	0	0	0	0	0	2	0	0	0	0	0	0	0	2	15	0	0	0	0	0	1	0	0	0	0	0	0	1	0	0	0	0	0	2	0
Ibidorhyncha_struthersii	11	0	0	0	0	50	0	0	0	0	0	1	0	62	2	0	0	0	0	10	0	0	0	0	0	0	0	12	74	0	0	0	0	0	10	0	0	0	0	0	0	10	1	0	0	0	0	48	0
Emberiza_fucata	2	0	0	0	0	12	0	0	0	0	0	1	0	15	0	0	0	0	0	4	0	0	0	0	0	0	0	4	19	0	0	0	0	0	0	0	0	0	0	0	0	0	0	0	0	0	0	8	0
Mohoua_ochrocephala	7	0	0	0	0	16	0	0	0	0	0	1	0	24	0	0	0	0	0	3	0	0	0	0	0	0	0	3	27	0	0	0	0	0	0	0	0	0	0	0	0	0	0	0	0	0	0	2	0
Prunella_himalayana	3	0	0	0	0	9	0	0	0	0	0	1	0	13	0	0	0	0	0	6	0	0	0	0	0	0	0	6	19	2	0	0	0	0	4	0	0	0	0	0	0	6	0	0	0	0	0	3	0
Dromas_ardeola	10	0	0	0	0	51	0	0	0	0	0	1	0	62	1	0	0	0	0	9	0	0	0	0	0	0	0	10	72	0	0	0	0	0	9	0	0	0	0	0	0	9	1	0	0	0	0	12	0
Ceuthmochares_aereus	4	0	0	0	0	42	0	0	0	0	0	1	0	47	1	0	0	0	0	7	0	0	0	0	0	0	0	8	55	0	0	0	0	0	9	0	0	0	0	0	0	9	1	0	0	0	0	27	0
Callaeas_wilsoni	7	0	0	0	0	14	0	0	0	0	0	1	0	22	1	0	0	0	0	3	0	0	0	0	0	0	0	4	26	0	0	0	0	0	1	0	0	0	0	0	0	1	0	0	0	0	0	7	0
Catharus_fuscescens	3	0	0	0	0	9	0	0	0	0	0	1	0	13	0	0	0	0	0	1	0	0	0	0	0	0	0	1	14	0	0	0	0	0	3	0	0	0	0	0	0	3	0	0	0	0	0	20	0
Alaudala_cheleensis	3	0	0	0	0	9	0	0	0	0	0	1	0	13	0	0	0	0	0	1	0	0	0	0	0	0	0	1	14	0	0	0	0	0	4	0	0	0	0	0	0	4	0	0	0	0	0	4	0
Galbula_dea	4	0	0	0	0	16	0	0	0	0	0	1	0	21	0	0	0	0	0	1	0	0	0	0	0	0	0	1	22	0	0	0	0	0	0	0	0	0	0	0	0	0	0	0	0	0	0	4	0
Quiscalus_mexicanus	2	0	0	0	0	13	0	0	0	0	0	1	0	16	0	0	0	0	0	2	0	0	0	0	0	0	0	2	18	0	0	0	0	0	8	0	0	0	0	0	0	8	1	0	0	0	0	15	0
Ramphastos_sulfuratus	2	0	0	0	0	21	0	0	0	0	0	1	0	24	0	0	0	0	0	4	0	0	0	0	0	0	0	4	28	0	0	0	0	0	3	0	0	0	0	0	0	3	0	0	0	0	0	5	0
Chloroceryle_aenea	7	0	0	0	0	13	0	0	0	0	0	1	0	21	0	0	0	0	0	1	0	0	0	0	0	0	0	1	22	1	0	0	0	0	6	0	0	0	0	0	0	7	1	0	0	0	0	10	0
Psophia_crepitans	9	0	0	0	0	53	0	0	0	0	0	1	0	63	2	0	0	0	0	4	0	0	0	0	0	0	0	6	69	1	0	0	0	0	7	0	0	0	0	0	0	8	1	0	0	0	0	17	0
Anseranas_semipalmata	14	0	0	0	0	50	0	0	0	0	0	1	0	65	0	0	0	0	0	6	0	0	0	0	0	0	0	6	71	0	0	0	0	0	28	0	0	0	0	0	0	28	0	0	0	0	0	36	0
Heliornis_fulica	4	0	0	0	0	37	0	0	0	0	0	1	0	42	1	0	0	0	0	4	0	0	0	0	0	0	0	5	47	0	0	0	0	0	6	0	0	0	0	0	0	6	2	0	0	0	0	16	0
Odontophorus_gujanensis	6	0	0	0	0	14	0	0	0	0	0	1	0	21	1	0	0	0	0	3	0	0	0	0	0	0	0	4	25	1	0	0	0	0	2	0	0	0	0	0	0	3	2	0	0	0	0	13	0
Dicrurus_megarhynchus	7	0	0	0	0	14	0	0	0	0	0	1	0	22	1	0	0	0	0	3	0	0	0	0	0	0	0	4	26	0	0	0	0	0	2	0	0	0	0	0	0	2	0	0	0	0	0	3	0
Spizaetus_tyrannus	12	0	0	0	0	37	0	0	0	0	0	1	0	50	1	0	0	0	0	6	0	0	0	0	0	0	0	7	57	0	0	0	0	0	2	0	0	0	0	0	0	2	0	0	0	0	0	13	1
Rhipidura_dahli	6	0	0	0	0	17	0	0	0	0	0	1	0	24	2	0	0	0	0	1	0	0	0	0	0	0	0	3	27	0	0	0	0	0	6	0	0	0	0	0	0	6	0	0	0	0	0	5	0
Trogon_melanurus	8	0	0	0	0	15	0	0	0	0	0	1	0	24	0	0	0	0	0	2	0	0	0	0	0	0	0	2	26	0	0	0	0	0	6	0	0	0	0	0	0	6	1	0	0	0	0	8	0
Piprites_chloris	5	0	0	0	0	15	0	0	0	0	0	1	0	21	1	0	0	0	0	2	0	0	0	0	0	0	0	3	24	0	0	0	0	0	1	0	0	0	0	0	0	1	1	0	0	0	0	2	0
Rostratula_benghalensis	10	0	0	0	0	87	0	0	0	0	0	1	0	98	0	0	0	0	0	20	0	0	0	0	0	0	0	20	118	1	0	0	0	0	10	0	0	0	0	0	0	11	0	0	0	0	0	28	0
Fregetta_grallaria	9	0	0	0	0	47	0	0	0	0	0	1	0	57	0	0	0	0	0	10	0	0	0	0	0	0	0	10	67	1	0	0	0	0	11	0	0	0	0	0	0	12	0	0	0	0	0	16	0
Herpetotheres_cachinnans	12	0	0	0	0	22	0	0	0	0	0	1	0	35	1	0	0	0	0	1	0	0	0	0	0	0	0	2	37	0	0	0	0	0	1	0	0	0	0	0	0	1	0	0	0	0	0	5	0
Alopecoenas_beccarii	13	0	0	0	0	41	0	0	0	0	0	1	0	55	0	0	0	0	0	4	0	0	0	0	0	0	0	4	59	0	0	0	0	0	5	0	0	0	0	0	0	5	1	0	0	0	0	18	0
Nyctiprogne_leucopyga	9	0	0	0	0	44	0	0	0	0	0	1	0	54	1	0	0	0	0	7	0	0	0	0	0	0	0	8	62	1	0	0	0	0	9	0	0	0	0	0	0	10	0	0	0	0	0	16	0
Sagittarius_serpentarius	12	0	0	0	0	27	0	0	0	0	0	1	0	40	1	0	0	0	0	11	0	0	0	0	0	0	0	12	52	0	0	0	0	0	1	0	0	0	0	0	0	1	1	0	0	0	0	11	0
Arenaria_interpres	11	0	0	0	0	49	0	0	0	0	0	1	0	61	1	0	0	0	0	4	0	0	0	0	0	0	0	5	66	0	0	0	0	0	13	0	0	0	0	0	0	13	0	0	0	0	0	16	0
Anthoscopus_minutus	4	0	0	0	0	14	0	0	0	0	0	1	0	19	0	0	0	0	0	2	0	0	0	0	0	0	0	2	21	0	0	0	0	0	3	0	0	0	0	0	0	3	0	0	0	0	0	12	0
Chauna_torquata	11	0	0	0	0	37	0	0	0	0	0	1	0	49	2	0	0	0	0	4	0	0	0	0	0	0	0	6	55	0	0	0	0	0	10	0	0	0	0	0	0	10	0	0	0	0	0	29	0
Corythaixoides_concolor	10	0	0	0	0	51	0	0	0	0	0	1	0	62	2	0	0	0	0	3	0	0	0	0	0	0	0	5	67	0	0	0	0	0	9	0	0	0	0	0	0	9	0	0	0	0	0	12	0
Sylvietta_virens	3	0	0	0	0	6	0	0	0	0	0	1	0	10	0	0	0	0	0	3	0	0	0	0	0	0	0	3	13	0	0	0	0	0	0	0	0	0	0	0	0	0	0	0	0	0	0	4	0
Phaetusa_simplex	13	0	0	0	0	54	0	0	0	0	0	1	0	68	0	0	0	0	0	10	0	0	0	0	0	0	0	10	78	0	0	0	0	0	6	0	0	0	0	0	0	6	1	0	0	0	0	5	0
Circaetus_pectoralis	13	0	0	0	0	40	0	0	0	0	0	1	0	54	0	0	0	0	0	5	0	0	0	0	0	0	0	5	59	0	0	0	0	0	2	0	0	0	0	0	0	2	0	0	0	0	0	4	1
Podilymbus_podiceps	10	0	0	0	0	55	0	0	0	0	0	1	0	66	0	0	0	0	0	5	0	0	0	0	0	0	0	5	71	0	0	0	0	0	8	0	0	0	0	0	0	8	0	0	0	0	0	14	0
Glaucidium_brasilianum	10	0	0	0	0	33	0	0	0	0	0	1	0	44	0	0	0	0	0	3	0	0	0	0	0	0	0	3	47	0	0	0	0	0	2	0	0	0	0	0	0	2	1	0	0	0	0	4	0
Amazona_guildingii	5	0	0	0	0	34	0	0	0	0	0	1	0	40	0	0	0	0	0	4	0	0	0	0	0	0	0	4	44	0	0	0	0	0	12	0	0	0	0	0	0	12	0	0	0	0	0	24	0
Chordeiles_acutipennis	11	0	0	0	0	84	0	0	0	0	0	1	0	96	0	0	0	0	0	22	0	0	0	0	0	0	0	22	118	0	0	0	0	0	32	0	0	0	0	0	0	32	0	0	0	0	0	39	0
Setophaga_kirtlandii	3	0	0	0	0	14	0	0	0	0	0	1	0	18	0	0	0	0	0	2	0	0	0	0	0	0	0	2	20	1	0	0	0	0	3	0	0	0	0	0	0	4	0	0	0	0	0	3	0
Mesembrinibis_cayennensis	10	0	0	0	0	33	0	0	0	0	0	1	0	44	3	0	0	0	0	6	0	0	0	0	0	0	0	9	53	0	0	0	0	0	3	0	0	0	0	0	0	3	0	0	0	0	0	22	0
Formicarius_rufipectus	5	0	0	0	0	12	0	0	0	0	0	1	0	18	1	0	0	0	0	0	0	0	0	0	0	0	0	1	19	0	0	0	0	0	0	0	0	0	0	0	0	0	0	0	0	0	0	2	0
Alectura_lathami	9	0	0	0	0	41	0	0	0	0	0	1	0	51	0	0	0	0	0	8	0	0	0	0	0	0	0	8	59	0	0	0	0	0	6	0	0	0	0	0	0	6	0	0	0	0	0	47	0
Tyrannus_savana	3	0	0	0	0	13	0	0	0	0	0	1	0	17	2	0	0	0	0	2	0	0	0	0	0	0	0	4	21	2	0	0	0	0	10	0	0	0	0	0	0	12	0	0	0	0	0	14	0
Podargus_strigoides	7	0	0	0	0	29	0	0	0	0	0	1	0	37	1	0	0	0	0	0	0	0	0	0	0	0	0	1	38	0	0	0	0	0	1	0	0	0	0	0	0	1	2	0	0	0	0	14	0
Semnornis_frantzii	2	0	0	0	0	16	0	0	0	0	0	1	0	19	0	0	0	0	0	5	0	0	0	0	0	0	0	5	24	0	0	0	0	0	2	0	0	0	0	0	0	2	0	0	0	0	0	6	0
Zosterops_hypoxanthus	4	0	0	0	0	11	0	0	0	0	0	1	0	16	0	0	0	0	0	4	0	0	0	0	0	0	0	4	20	0	0	0	0	0	12	0	0	0	0	0	0	12	0	0	0	0	0	24	0
Leptocoma_aspasia	5	0	0	0	0	9	0	0	0	0	0	1	0	15	0	0	0	0	0	2	0	0	0	0	0	0	0	2	17	0	0	0	0	0	1	0	0	0	0	0	0	1	0	0	0	0	0	3	0
Oxyruncus_cristatus	7	0	0	0	0	16	0	0	0	0	0	1	0	24	0	0	0	0	0	1	0	0	0	0	0	0	0	1	25	0	0	0	0	0	5	0	0	0	0	0	0	5	0	0	0	0	0	8	0
Gymnorhina_tibicen	5	0	0	0	0	16	0	0	0	0	0	1	0	22	1	0	0	0	0	2	0	0	0	0	0	0	0	3	25	0	0	0	0	0	3	0	0	0	0	0	0	3	0	0	0	0	0	3	0
Serilophus_lunatus	4	0	0	0	0	19	0	0	0	0	0	1	0	24	3	0	0	0	0	1	0	0	0	0	0	0	0	4	28	0	0	0	0	0	4	0	0	0	0	0	0	4	0	0	0	0	0	7	0
Illadopsis_cleaveri	3	0	0	0	0	14	0	0	0	0	0	1	0	18	0	0	0	0	0	2	0	0	0	0	0	0	0	2	20	0	0	0	0	0	5	0	0	0	0	0	0	5	0	0	0	0	0	6	0
Cinclus_mexicanus	3	0	0	0	0	13	0	0	0	0	0	1	0	17	2	0	0	0	0	2	0	0	0	0	0	0	0	4	21	0	0	0	0	0	3	0	0	0	0	0	0	3	0	0	0	0	0	2	0
Ploceus_nigricollis	4	0	0	0	0	12	0	0	0	0	0	1	0	17	0	0	0	0	0	2	0	0	0	0	0	0	0	2	19	0	0	0	0	0	1	0	0	0	0	0	0	1	0	0	0	0	0	4	0
Indicator_maculatus	0	0	0	0	0	16	0	0	0	0	0	1	0	17	0	0	0	0	0	3	0	0	0	0	0	0	0	3	20	0	0	0	0	0	29	0	0	0	0	0	0	29	0	0	0	0	0	36	0
Oenanthe_oenanthe	0	0	0	0	0	14	0	0	0	0	0	1	0	15	0	0	0	0	0	3	0	0	0	0	0	0	0	3	18	1	0	0	0	0	3	0	0	0	0	0	0	4	0	0	0	0	0	6	0
Rynchops_niger	11	0	0	0	0	44	0	0	0	0	0	1	0	56	2	0	0	0	0	7	0	0	0	0	0	0	0	9	65	0	0	0	0	0	3	0	0	0	0	0	0	3	1	0	0	0	0	9	0
Nycticryphes_semicollaris	12	0	0	0	0	44	0	0	0	0	0	1	0	57	0	0	0	0	0	6	0	0	0	0	0	0	0	6	63	0	0	0	0	0	7	0	0	0	0	0	0	7	0	0	0	0	0	10	0
Hippolais_icterina	4	0	0	0	0	15	0	0	0	0	0	1	0	20	0	0	0	0	0	0	0	0	0	0	0	0	0	0	20	0	0	0	0	0	7	0	0	0	0	0	0	7	0	0	0	0	0	13	0
Himantopus_himantopus	12	0	0	0	0	53	0	0	0	0	0	1	0	66	2	0	0	0	0	6	0	0	0	0	0	0	0	8	74	0	0	0	0	0	7	0	0	0	0	0	0	7	0	0	0	0	0	21	0
Rhinopomastus_cyanomelas	1	0	0	0	0	5	0	0	0	0	0	1	0	7	0	0	0	0	0	1	0	0	0	0	0	0	0	1	8	0	0	0	0	0	1	0	0	0	0	0	0	1	0	0	0	0	0	3	0
Rhinoptilus_africanus	8	0	0	0	0	44	0	0	0	0	0	1	0	53	1	0	0	0	0	7	0	0	0	0	0	0	0	8	61	0	0	0	0	0	6	0	0	0	0	0	0	6	0	0	0	0	0	11	0
Locustella_ochotensis	3	0	0	0	0	19	0	0	0	0	0	1	0	23	1	0	0	0	0	10	0	0	0	0	0	0	0	11	34	0	0	0	0	0	5	0	0	0	0	0	0	5	0	0	0	0	0	31	0
Phainopepla_nitens	3	0	0	0	0	10	0	0	0	0	0	1	0	14	1	0	0	0	0	2	0	0	0	0	0	0	0	3	17	0	0	0	0	0	4	0	0	0	0	0	0	4	0	0	0	0	0	9	0
Aramus_guarauna	13	0	0	0	0	53	0	0	0	0	0	1	0	67	0	0	0	0	0	4	0	0	0	0	0	0	0	4	71	0	0	0	0	0	8	0	0	0	0	0	0	8	1	0	0	0	0	14	0
Cisticola_juncidis	2	0	0	0	0	7	0	0	0	0	0	1	0	10	0	0	0	0	0	2	0	0	0	0	0	0	0	2	12	1	0	0	0	0	12	0	0	0	0	0	0	13	0	0	0	0	0	14	0
Oriolus_oriolus	5	0	0	0	0	17	0	0	0	0	0	1	0	23	2	0	0	0	0	1	0	0	0	0	0	0	0	3	26	0	0	0	0	0	1	0	0	0	0	0	0	1	0	0	0	0	0	4	0
Sitta_europaea	1	0	0	0	0	9	0	0	0	0	0	1	0	11	0	0	0	0	0	3	0	0	0	0	0	0	0	3	14	1	0	0	0	0	2	0	0	0	0	0	0	3	0	0	0	0	0	4	0
Rhadina_sibilatrix	4	0	0	0	0	8	0	0	0	0	0	1	0	13	0	0	0	0	0	3	0	0	0	0	0	0	0	3	16	0	0	0	0	0	3	0	0	0	0	0	0	3	0	0	0	0	0	13	0
Larus_smithsonianus	11	0	0	0	0	49	0	0	0	0	0	1	0	61	2	0	0	0	0	4	0	0	0	0	0	0	0	6	67	0	0	0	0	0	0	0	0	0	0	0	0	0	4	0	0	0	0	31	0
Bombycilla_garrulus	3	0	0	0	0	10	0	0	0	0	0	1	0	14	0	0	0	0	0	2	0	0	0	0	0	0	0	2	16	0	0	0	0	0	5	0	0	0	0	0	0	5	0	0	0	0	0	8	0
Eurystomus_gularis	9	0	0	0	0	24	0	0	0	0	0	1	0	34	0	0	0	0	0	5	0	0	0	0	0	0	0	5	39	0	0	0	0	0	4	0	0	0	0	0	0	4	0	0	0	0	0	8	0
Certhia_brachydactyla	3	0	0	0	0	11	0	0	0	0	0	1	0	15	0	0	0	0	0	0	0	0	0	0	0	0	0	0	15	0	0	0	0	0	4	0	0	0	0	0	0	4	0	0	0	0	0	9	0
Thinocorus_orbignyianus	10	0	0	0	0	48	0	0	0	0	0	1	0	59	1	0	0	0	0	2	0	0	0	0	0	0	0	3	62	0	0	0	0	0	14	0	0	0	0	0	0	14	0	0	0	0	0	15	0
Vidua_macroura	5	0	0	0	0	12	0	0	0	0	0	1	0	18	0	0	0	0	0	3	0	0	0	0	0	0	0	3	21	0	0	0	0	0	7	0	0	0	0	0	0	7	0	0	0	0	0	7	0
Scytalopus_superciliaris	7	0	0	0	0	15	0	0	0	0	0	1	0	23	0	0	0	0	0	4	0	0	0	0	0	0	0	4	27	0	0	0	0	0	9	0	0	0	0	0	0	9	0	0	0	0	0	13	0
Pycnonotus_jocosus	4	0	0	0	0	15	0	0	0	0	0	1	0	20	0	0	0	0	0	1	0	0	0	0	0	0	0	1	21	1	0	0	0	0	2	0	0	0	0	0	0	3	0	0	0	0	0	3	0
Leiothrix_lutea	2	0	0	0	0	16	0	0	0	0	0	2	0	20	0	0	0	0	0	2	0	0	0	0	0	0	0	2	22	1	0	0	0	0	2	0	0	0	0	0	0	3	1	0	0	0	0	5	0
Tricholaema_leucomelas	1	0	0	0	0	41	0	0	0	0	0	1	0	43	0	0	0	0	0	3	0	0	0	0	0	0	0	3	46	0	0	0	0	0	5	0	0	0	0	0	0	5	0	0	0	0	0	14	0
Nicator_chloris	3	0	0	0	0	12	0	0	0	0	0	1	0	16	0	0	0	0	0	3	0	0	0	0	0	0	0	3	19	0	0	0	0	0	0	0	0	0	0	0	0	0	2	0	0	0	0	7	0
Erpornis_zantholeuca	6	0	0	0	0	14	0	0	0	0	0	1	0	21	0	0	0	0	0	2	0	0	0	0	0	0	0	2	23	0	0	0	0	0	0	0	0	0	0	0	0	0	0	0	0	0	0	0	0
Scopus_umbretta	8	0	0	0	0	28	0	0	0	0	0	1	0	37	1	0	0	0	0	6	0	0	0	0	0	0	0	7	44	0	0	0	0	0	8	0	0	0	0	0	0	8	1	0	0	0	0	18	0
Jacana_jacana	9	0	0	0	0	57	0	0	0	0	0	1	0	67	0	0	0	0	0	6	0	0	0	0	0	0	0	6	73	0	0	0	0	0	15	0	0	0	0	0	0	15	0	0	0	0	0	26	0
Peucedramus_taeniatus	4	0	0	0	0	9	0	0	0	0	0	1	0	14	0	0	0	0	0	3	0	0	0	0	0	0	0	3	17	0	0	0	0	0	4	0	0	0	0	0	0	4	0	0	0	0	0	6	0
Chloropsis_cyanopogon	5	0	0	0	0	13	0	0	0	0	0	1	0	19	0	0	0	0	0	3	0	0	0	0	0	0	0	3	22	0	0	0	0	0	1	0	0	0	0	0	0	1	0	0	0	0	0	9	0
Syrrhaptes_paradoxus	5	0	0	0	0	16	0	0	0	0	0	1	0	22	2	0	0	0	0	4	0	0	0	0	0	0	0	6	28	0	0	0	0	0	1	0	0	0	0	0	0	1	0	0	0	0	0	12	0
Hypocryptadius_cinnamomeus	5	0	0	0	0	12	0	0	0	0	0	1	0	18	0	0	0	0	0	2	0	0	0	0	0	0	0	2	20	0	0	0	0	0	0	0	0	0	0	0	0	0	1	0	0	0	0	5	0
Mystacornis_crossleyi	4	0	0	0	0	8	0	0	0	0	0	1	0	13	1	0	0	0	0	2	0	0	0	0	0	0	0	3	16	0	0	0	0	0	1	0	0	0	0	0	0	1	1	0	0	0	0	16	0
Oxylabes_madagascariensis	0	0	0	0	0	8	0	0	0	0	0	1	0	9	0	0	0	0	0	4	0	0	0	0	0	0	0	4	13	0	0	0	0	0	2	0	0	0	0	0	0	2	8	0	0	0	0	8	0
Neodrepanis_coruscans	2	0	0	0	0	12	0	0	0	0	0	1	0	15	1	0	0	0	0	4	0	0	0	0	0	0	0	5	20	0	0	0	0	0	2	0	0	0	0	0	0	2	9	0	0	0	0	5	0
Prunella_fulvescens	3	0	0	0	0	11	0	0	0	0	0	1	0	15	0	0	0	0	0	3	0	0	0	0	0	0	0	3	18	0	0	0	0	0	4	0	0	0	0	0	0	4	0	0	0	0	0	6	0
Pomatostomus_ruficeps	7	0	0	0	0	11	0	0	0	0	0	1	0	19	0	0	0	0	0	1	0	0	0	0	0	0	0	1	20	0	0	0	0	0	1	0	0	0	0	0	0	1	0	0	0	0	0	3	0
Pelecanoides_urinatrix	8	0	0	0	0	32	0	0	0	0	0	1	0	41	1	0	0	0	0	4	0	0	0	0	0	0	0	5	46	0	0	0	0	0	2	0	0	0	0	0	0	2	1	0	0	0	0	25	0
Chaetops_frenatus	6	0	0	0	0	8	0	0	0	0	0	1	0	15	0	0	0	0	0	3	0	0	0	0	0	0	0	3	18	0	0	0	0	0	2	0	0	0	0	0	0	2	0	0	0	0	0	7	0
Pluvianellus_socialis	8	0	0	0	0	55	0	0	0	0	0	1	0	64	3	0	0	0	0	3	0	0	0	0	0	0	0	6	70	0	0	0	0	0	7	0	0	0	0	0	0	7	3	0	0	0	0	41	0
Centropus_bengalensis	6	0	0	0	0	19	0	0	0	0	0	1	0	26	0	0	0	0	0	14	0	0	0	0	0	0	0	14	40	1	0	0	0	0	10	0	0	0	0	0	0	11	1	0	0	0	0	44	0
Zapornia_atra	6	0	0	0	0	36	0	0	0	0	0	1	0	43	1	0	0	0	0	8	0	0	0	0	0	0	0	9	52	0	0	0	0	0	19	0	0	0	0	0	0	19	3	0	0	0	0	27	0
Buphagus_erythrorhynchus	1	0	0	0	0	9	0	0	0	0	0	1	0	11	0	0	0	0	0	3	0	0	0	0	0	0	0	3	14	1	0	0	0	0	2	0	0	0	0	0	0	3	6	0	0	0	0	12	0
Anhinga_rufa	6	0	0	0	0	11	0	0	0	0	0	1	0	18	1	0	0	0	0	3	0	0	0	0	0	0	0	4	22	0	0	0	0	0	3	0	0	0	0	0	0	3	3	0	0	0	0	9	0
Thalassarche_chlororhynchos	10	0	0	0	0	34	0	0	0	0	0	1	0	45	1	0	0	0	0	11	0	0	0	0	0	0	0	12	57	0	0	0	0	0	4	0	0	0	0	0	0	4	0	0	0	0	0	32	0
Pardalotus_punctatus	5	0	0	0	0	10	0	0	0	0	0	1	0	16	1	0	0	0	0	1	0	0	0	0	0	0	0	2	18	0	0	0	0	0	0	0	0	0	0	0	0	0	0	0	0	0	0	1	0
Turnix_velox	1	0	0	0	0	27	0	0	0	0	0	1	0	29	0	0	0	0	0	4	0	0	0	0	0	0	0	4	33	0	0	0	0	0	7	0	0	0	0	0	0	7	3	0	0	0	0	15	0
Drymodes_brunneopygia	4	0	0	0	0	12	0	0	0	0	0	1	0	17	1	0	0	0	0	1	0	0	0	0	0	0	0	2	19	0	0	0	0	0	3	0	0	0	0	0	0	3	0	0	0	0	0	13	0
Atrichornis_clamosus	5	0	0	0	0	10	0	0	0	0	0	1	0	16	0	0	0	0	0	3	0	0	0	0	0	0	0	3	19	0	0	0	0	0	2	0	0	0	0	0	0	2	0	0	0	0	0	7	0
Oreotrochilus_melanogaster	1	0	0	0	0	12	0	0	0	0	0	1	0	14	0	0	0	0	0	1	0	0	0	0	0	0	0	1	15	2	0	0	0	0	4	0	0	0	0	0	0	6	0	0	0	0	0	4	0
Rissa_tridactyla	12	0	0	0	0	52	0	0	0	0	0	1	0	65	2	0	0	0	0	5	0	0	0	0	0	0	0	7	72	0	0	0	0	0	0	0	0	0	0	0	0	0	0	0	0	0	0	38	0
Horornis_vulcanius	1	0	0	0	0	14	0	0	0	0	0	1	0	16	0	0	0	0	0	1	0	0	0	0	0	0	0	1	17	0	0	0	0	0	6	0	0	0	0	0	0	6	4	0	0	0	0	10	0
Uria_aalge	9	0	0	0	0	46	0	0	0	0	0	1	0	56	0	0	0	0	0	7	0	0	0	0	0	0	0	7	63	1	0	0	0	0	1	0	0	0	0	0	0	2	3	0	0	0	0	11	0
Cepphus_grylle	10	0	0	0	0	44	0	0	0	0	0	1	0	55	2	0	0	0	0	8	0	0	0	0	0	0	0	10	65	0	0	0	0	0	3	0	0	0	0	0	0	3	3	0	0	0	0	61	0
Passerina_amoena	3	0	0	0	0	67	0	0	0	0	0	1	0	71	0	0	0	0	0	21	0	0	0	0	0	0	0	21	92	0	0	0	0	0	20	0	0	0	0	0	0	20	0	0	0	0	0	188	0
Calonectris_borealis	6	0	0	0	0	26	0	0	0	0	0	1	0	33	4	0	0	0	0	2	0	0	0	0	0	0	0	6	39	1	0	0	0	0	4	0	0	0	0	0	0	5	2	0	0	0	0	23	0
Cettia_cetti	3	0	0	0	0	13	0	0	0	0	0	1	0	17	0	0	0	0	0	6	0	0	0	0	0	0	0	6	23	0	0	0	0	0	0	0	0	0	0	0	0	0	0	0	0	0	0	644	0
Xiphorhynchus_elegans	4	0	0	0	0	17	0	0	0	0	0	1	0	22	0	0	0	0	0	22	0	0	0	0	0	0	0	22	44	0	0	0	0	0	7	0	0	0	0	0	0	7	0	0	0	0	0	302	0
Pomatorhinus_ruficollis	3	0	0	0	0	15	0	0	0	0	0	1	0	19	0	0	0	0	0	3	0	0	0	0	0	0	0	3	22	0	0	0	0	0	0	0	0	0	0	0	0	0	0	0	0	0	0	4	0
Atlantisia_rogersi	13	0	0	0	0	61	0	0	0	0	0	1	0	75	10	0	0	0	0	26	0	0	0	0	0	0	0	36	111	0	0	0	0	0	0	0	0	0	0	0	0	0	8	0	0	0	0	885	0
Pteruthius_melanotis	7	0	0	0	0	13	0	0	0	0	0	1	0	21	0	0	0	0	0	4	0	0	0	0	0	0	0	4	25	0	0	0	0	0	0	0	0	0	0	0	0	0	0	0	0	0	0	3	0
Urocolius_indicus	2	0	0	0	0	12	0	0	0	0	0	1	0	15	0	0	0	0	0	0	0	0	0	0	0	0	0	0	15	0	0	0	0	0	0	0	0	0	0	0	0	0	0	0	0	0	0	4	0
Pandion_haliaetus	9	0	0	0	0	21	0	0	0	0	0	1	0	31	0	0	0	0	0	6	0	0	0	0	0	0	0	6	37	0	0	0	0	0	0	0	0	0	0	0	0	0	1	0	0	0	0	7	0
Glareola_pratincola	10	0	0	0	0	63	0	0	0	0	0	1	0	74	0	0	0	0	0	14	0	0	0	0	0	0	0	14	88	1	0	0	0	0	14	0	0	0	0	0	0	15	2	0	0	0	0	25	0
Balaeniceps_rex	9	0	0	0	0	26	0	0	0	0	0	1	0	36	2	0	0	0	0	8	0	0	0	0	0	0	0	10	46	0	0	0	0	0	12	0	0	0	0	0	0	12	0	0	0	0	0	45	0
Brachypteracias_leptosomus	8	0	0	0	0	26	0	0	0	0	0	1	0	35	0	0	0	0	0	6	0	0	0	0	0	0	0	6	41	0	0	0	0	0	5	0	0	0	0	0	0	5	0	0	0	0	0	9	0
Ceyx_cyanopectus	0	0	0	0	0	20	0	0	0	0	0	1	0	21	2	0	0	0	0	2	0	0	0	0	0	0	0	4	25	0	0	0	0	0	5	0	0	0	0	0	0	5	9	0	0	0	0	13	0
Spizella_passerina	1	0	0	0	0	7	0	0	0	0	0	1	0	9	0	0	0	0	0	3	0	0	0	0	0	0	0	3	12	0	0	0	0	0	1	0	0	0	0	0	0	1	6	0	0	0	0	21	0
Ara_glaucogularis	5	0	0	0	0	41	0	0	0	0	0	1	0	47	1	0	0	0	0	4	0	0	0	0	0	0	0	5	52	0	0	0	0	0	0	0	0	0	0	0	0	0	0	0	0	0	0	0	0
Labeo_gonius	0	8	33	8	12	1	1	0	0	0	0	2	20	85	0	0	8	1	2	0	1	0	0	0	0	0	7	19	104	0	2	10	5	3	0	0	1	0	0	0	6	27	0	2	25	11	24	0	0
Clarias_magur	0	11	78	16	51	0	2	1	0	0	0	4	22	185	0	0	3	0	1	0	0	0	0	0	0	0	9	13	198	0	0	0	0	0	0	0	0	0	0	0	0	0	0	0	0	0	0	0	0
Myotis_myotis	115	1	0	0	0	334	1	0	0	0	0	0	0	451	6	0	0	0	0	15	0	0	0	0	0	0	0	21	472	1	0	0	0	0	2	0	0	0	0	0	0	3	0	0	0	0	0	1	0
Pipistrellus_kuhlii	110	0	0	0	0	322	1	0	0	0	0	0	0	433	4	1	0	0	0	21	0	0	0	0	0	0	0	26	459	0	0	0	0	0	0	0	0	0	0	0	0	0	0	0	0	0	0	0	0
Molossus_molossus	97	1	0	0	0	286	0	0	0	0	0	0	0	384	9	0	0	0	0	30	0	0	0	0	0	0	0	39	423	0	0	0	0	0	1	0	0	0	0	0	0	1	0	0	0	0	0	0	0
Rousettus_aegyptiacus	109	0	0	0	0	316	0	0	0	0	0	0	0	425	5	1	0	0	0	34	0	0	0	0	0	0	0	40	465	1	0	0	0	0	0	0	0	0	0	0	0	1	0	0	0	0	0	2	0
Dicerorhinus_sumatrensis_harrissoni	118	1	0	0	0	768	1	0	0	0	0	0	0	888	25	1	0	0	0	176	0	0	0	0	0	0	0	202	1090	5	0	0	0	0	79	0	0	0	0	0	0	84	6	0	0	0	0	94	0
Elephas_maximus	35	1	0	0	0	423	1	0	0	0	0	0	0	460	10	0	0	0	0	95	0	0	0	0	0	0	0	105	565	212	3	0	0	0	1881	0	0	0	0	0	0	2096	2	0	0	0	0	95	0
Aspidoscelis_marmoratus	8	0	0	0	0	265	1	0	0	0	0	1	0	275	1	1	0	0	0	27	0	0	0	0	0	0	0	29	304	0	0	0	0	0	23	0	0	0	0	0	0	23	0	0	0	0	0	14	0
Cygnus_cygnus	10	0	0	0	0	35	0	0	0	0	0	1	0	46	0	0	0	0	0	1	0	0	0	0	0	0	0	1	47	1	0	0	0	0	3	0	0	0	0	0	0	4	0	0	0	0	0	14	0
Columba_janthina_nitens	11	0	0	0	0	27	0	0	0	0	0	1	0	39	0	0	0	0	0	9	0	0	0	0	0	0	0	9	48	0	0	0	0	0	8	0	0	0	0	0	0	8	0	0	0	0	0	10	0
Corvus_macrorhynchos	7	0	0	0	0	13	0	0	0	0	0	1	0	21	0	0	0	0	0	3	0	0	0	0	0	0	0	3	24	0	0	0	0	0	0	0	0	0	0	0	0	0	0	0	0	0	0	3	0
Fratercula_cirrhata	8	0	0	0	0	42	0	0	0	0	0	1	0	51	1	0	0	0	0	5	0	0	0	0	0	0	0	6	57	0	0	0	0	0	5	0	0	0	0	0	0	5	0	0	0	0	0	4	0
Haliaeetus_pelagicus	10	0	0	0	0	30	0	0	0	0	0	1	0	41	1	0	0	0	0	2	0	0	0	0	0	0	0	3	44	0	0	0	0	0	4	0	0	0	0	0	0	4	0	0	0	0	0	4	0
Leucopsar_rothschildi	2	0	0	0	0	13	0	0	0	0	0	1	0	16	0	0	0	0	0	0	0	0	0	0	0	0	0	0	16	0	0	0	0	0	1	0	0	0	0	0	0	1	0	0	0	0	0	0	0
Phoebastria_albatrus	9	0	0	0	0	33	0	0	0	0	0	1	0	43	3	0	0	0	0	16	0	0	0	0	0	0	0	19	62	0	0	0	0	0	7	0	0	0	0	0	0	7	0	0	0	0	0	16	0
Pteropus_pselaphon	99	0	0	0	0	409	0	0	0	0	0	0	0	508	4	1	0	0	0	49	0	0	0	0	0	0	0	54	562	0	0	0	0	0	20	0	0	0	0	0	0	20	3	0	0	0	0	61	0
Uria_aalge_inornata	6	0	0	0	0	32	0	0	0	0	0	1	0	39	0	0	0	0	0	7	0	0	0	0	0	0	0	7	46	1	0	0	0	0	5	0	0	0	0	0	0	6	1	0	0	0	0	4	0
Ursus_thibetanus_japonicus	121	2	0	0	0	627	0	0	0	0	0	0	0	750	8	0	0	0	0	91	0	0	0	0	0	0	0	99	849	9	0	0	0	0	76	0	0	0	0	0	0	85	36	0	0	0	0	100	0
Eleutheronema_tetradactylum	0	1	53	4	31	0	1	0	0	0	0	1	7	98	0	0	6	0	5	0	0	0	0	0	0	0	1	12	110	0	0	1	0	2	0	0	0	0	0	0	0	3	0	0	39	5	26	0	0
Cardinalis_cardinalis	3	0	0	0	0	14	0	0	0	0	0	1	0	18	0	0	0	0	0	8	0	0	0	0	0	0	0	8	26	0	0	0	0	0	3	0	0	0	0	0	0	3	0	0	0	0	0	8	0
Manis_javanica	112	0	0	0	0	669	0	0	0	0	0	1	0	782	14	2	0	0	0	164	0	0	0	0	0	0	0	180	962	4	0	0	0	0	57	0	0	0	0	0	0	61	5	0	0	0	0	61	0
Manis_pentadactyla	141	2	0	0	0	799	0	0	0	0	0	1	0	943	7	0	0	0	0	300	0	0	0	0	0	0	0	307	1250	2	0	0	0	0	66	0	0	0	0	0	0	68	2	0	0	0	0	75	0
Oryzias_celebensis	0	2	37	4	24	0	1	1	0	0	0	1	9	79	0	0	5	0	1	1	0	0	0	0	0	0	2	9	88	0	0	0	0	0	0	0	0	0	0	0	0	0	0	0	0	0	0	0	0
Lycocorax_pyrrhopterus_obiensis	7	0	0	0	0	134	0	0	0	0	0	1	0	142	0	0	0	0	0	85	0	0	0	0	0	0	0	85	227	0	0	0	0	0	4	0	0	0	0	0	0	4	0	0	0	0	0	14	0
Silurus_glanis	0	7	26	13	19	0	1	0	0	0	0	2	10	78	0	2	2	1	0	0	0	0	0	0	0	0	4	9	87	0	2	0	0	1	0	0	0	0	0	0	0	3	0	0	3	0	3	0	0
Oryx_dammah	112	1	0	0	0	665	1	0	0	0	0	0	0	779	14	1	0	0	0	135	0	0	0	0	0	0	0	150	929	4	0	0	0	0	39	0	0	0	0	0	0	43	4	0	0	0	0	67	0
Lucifuga_dentata	0	1	44	2	4	0	1	0	0	0	0	1	3	56	0	0	6	1	4	0	0	0	0	0	0	0	1	12	68	0	0	6	0	2	0	0	1	0	0	0	1	10	0	0	11	0	3	0	0
Passer_montanus	3	0	0	0	0	30	0	0	0	0	0	1	0	34	1	0	0	0	0	8	0	0	0	0	0	0	0	9	43	0	0	0	0	0	5	0	0	0	0	0	0	5	0	0	0	0	0	28	0
Sturnira_hondurensis	90	0	0	0	0	460	1	0	0	0	0	0	0	551	7	1	0	0	0	54	0	0	0	0	0	0	0	62	613	2	0	0	0	0	16	0	0	0	0	0	0	18	3	0	0	0	0	89	0
Artibeus_jamaicensis	99	0	0	0	0	375	1	0	0	0	0	0	0	475	6	1	0	0	0	56	0	0	0	0	0	0	0	63	538	3	0	0	0	0	30	0	0	0	0	0	0	33	6	0	0	0	0	49	0
Odontesthes_bonariensis	0	3	40	2	12	0	1	1	0	0	0	1	1	61	0	0	9	0	4	1	0	0	0	0	0	0	2	16	77	0	0	14	1	4	0	0	1	0	0	0	0	20	0	0	9	0	3	0	0
Cercopithecus_mona	38	0	0	0	0	252	1	0	0	0	0	1	0	292	9	0	0	0	0	33	0	0	0	0	0	0	0	42	334	0	0	0	0	0	0	0	0	0	0	0	0	0	0	0	0	0	0	1	0
Microtus_fortis	96	0	0	0	0	824	1	0	0	0	0	0	0	921	6	1	0	0	0	92	0	0	0	0	0	0	0	99	1020	0	0	0	0	0	47	0	0	0	0	0	0	47	4	0	0	0	0	40	0
Talpa_occidentalis	105	0	0	0	0	1199	1	0	0	0	0	1	0	1306	11	0	0	0	0	313	0	0	0	0	0	0	0	324	1630	0	0	0	0	0	1	0	0	0	0	0	0	1	2	0	0	0	0	16	0
Puma_yagouaroundi	110	0	0	0	0	571	0	0	0	0	0	0	0	681	11	1	0	0	0	55	0	0	0	0	0	0	0	67	748	5	0	0	0	0	12	1	0	0	0	0	0	18	21	0	0	0	0	78	0
Rangifer_tarandus_granti	112	1	0	0	0	785	1	0	0	0	0	0	0	899	21	0	0	0	0	158	0	0	0	0	0	0	0	179	1078	4	0	0	0	0	10	0	0	0	0	0	0	14	26	0	0	0	0	100	0
Kobus_leche_leche	126	2	0	0	0	759	1	0	0	0	0	0	0	888	11	0	0	0	0	115	0	0	0	0	0	0	0	126	1014	1	0	0	0	0	29	0	0	0	0	0	0	30	4	0	0	0	0	93	0
Oreochromis_tanganicae	0	4	71	5	22	1	1	1	0	0	0	1	16	122	0	0	15	0	3	0	0	0	0	0	0	0	9	27	149	0	0	3	0	1	0	0	0	0	0	0	1	5	0	0	30	0	12	0	0
Cyprichromis_pavo	0	2	24	1	15	1	1	1	0	0	0	1	6	52	0	0	4	0	0	0	0	0	0	0	0	0	2	6	58	0	1	2	0	2	0	0	0	0	0	0	0	5	0	0	8	4	3	0	0
Hemibates_koningsi	0	2	22	1	8	0	1	1	0	0	0	1	11	47	0	0	6	1	1	1	0	0	0	0	0	0	6	15	62	0	0	2	0	0	0	0	0	0	0	0	0	2	0	0	16	0	4	0	0
Lamprologus_callipterus	0	0	33	3	15	0	1	0	0	0	0	1	8	61	0	0	5	0	3	1	0	0	0	0	0	0	5	14	75	0	0	3	0	2	0	0	0	0	0	0	0	5	0	3	15	1	1	0	0
Limnochromis_abeelei	0	2	38	3	15	1	1	0	0	0	0	1	7	68	0	0	5	1	2	0	0	0	0	0	0	0	2	10	78	0	1	3	0	0	0	0	1	0	0	0	0	5	0	0	11	0	8	0	0
Altolamprologus_calvus	0	2	30	4	11	1	1	1	0	0	0	1	6	57	0	0	2	1	2	0	0	0	0	0	0	0	3	8	65	0	1	1	0	0	0	0	0	0	0	0	0	2	0	0	6	2	4	0	0
Pseudosimochromis_curvifrons	0	2	38	3	20	0	1	1	0	0	0	1	11	77	0	0	17	0	1	1	0	0	0	0	0	0	5	24	101	0	0	2	0	0	0	0	0	0	0	0	0	2	0	1	8	2	6	0	0
Cyprichromis_zonatus	0	2	26	2	12	1	1	0	0	0	0	1	5	50	0	0	8	1	0	0	0	0	0	0	0	0	3	12	62	0	0	2	0	0	0	0	1	0	0	0	0	3	0	1	9	3	7	0	0
Lamprologus_ocellatus	0	2	28	5	13	1	1	1	0	0	0	1	11	63	0	0	7	0	2	0	0	0	0	0	0	0	1	10	73	0	0	5	0	0	0	0	0	0	0	0	1	6	0	1	7	0	3	0	0
Gnathochromis_pfefferi	0	2	36	3	17	0	1	0	0	0	0	1	8	68	0	1	8	1	0	0	0	0	0	0	0	0	2	12	80	0	0	4	0	0	0	0	0	0	0	0	0	4	0	0	9	2	4	0	0
Petrochromis_sp_orthognathus_ikola_AB-2019	0	2	39	3	16	0	1	1	0	0	0	1	7	70	0	0	7	0	1	0	0	0	0	0	0	0	3	11	81	0	0	0	0	1	0	0	0	0	0	0	0	1	0	1	13	2	5	0	0
Neolamprologus_devosi	0	1	27	3	10	1	1	1	0	0	0	1	6	51	0	0	5	0	0	0	0	0	0	0	0	0	2	7	58	0	0	3	0	1	0	0	0	0	0	0	0	4	0	0	10	4	6	0	0
Pseudosimochromis_marginatus	0	2	38	3	15	0	1	1	0	0	0	1	9	70	0	0	11	0	4	1	0	0	0	0	0	0	1	17	87	0	0	3	0	0	0	0	0	0	0	0	0	3	0	1	12	1	3	0	0
Benitochromis_conjunctus	0	2	49	2	19	0	1	0	0	0	0	1	9	83	0	0	3	0	1	1	0	0	0	0	0	0	3	8	91	0	0	1	0	1	0	0	0	0	0	0	0	2	0	2	6	6	7	1	0
Apistogramma_diplotaenia	0	2	45	2	13	1	0	1	0	0	0	1	11	76	0	0	5	0	4	0	0	0	0	0	0	0	1	10	86	0	0	0	0	0	0	0	0	0	0	0	0	0	0	0	31	2	3	0	0
Julidochromis_sp_unterfels_AB-2019	0	1	26	1	13	0	1	1	0	0	0	1	6	50	0	0	6	0	1	1	0	0	0	0	0	0	5	13	63	0	0	0	1	0	0	0	0	0	0	0	0	1	0	2	5	2	4	0	0
Tropheus_sp_black	0	2	32	2	16	0	1	1	0	0	0	1	8	63	0	0	16	0	1	1	0	0	0	0	0	0	3	21	84	0	0	3	0	0	0	0	0	0	0	0	1	4	0	1	13	2	2	0	0
Chaenogobius_annularis	0	1	30	3	9	0	1	0	0	0	0	1	2	47	0	0	14	1	5	0	0	0	0	0	0	0	5	25	72	0	0	0	0	0	0	0	0	0	0	0	0	0	0	0	0	0	0	0	0
Chalinochromis_brichardi	0	2	27	4	12	0	1	1	0	0	0	0	5	52	0	0	5	0	3	1	0	0	0	0	0	0	2	11	63	0	0	1	0	0	0	0	0	0	0	1	1	3	0	1	14	0	7	0	0
Xenotilapia_sima	0	2	32	4	15	0	1	1	0	0	0	1	9	65	0	0	10	0	1	1	0	0	0	0	0	0	1	13	78	0	0	1	1	0	0	0	0	0	0	0	1	3	0	1	7	1	4	0	0
Lepidiolamprologus_elongatus	0	2	24	3	15	0	1	0	0	0	0	1	8	54	0	0	3	0	0	1	0	0	0	0	0	0	1	5	59	0	0	2	0	0	0	0	0	0	0	0	0	2	0	0	8	2	3	0	0
Neolamprologus_fasciatus	0	2	31	4	14	1	1	1	0	0	0	1	8	63	0	0	6	0	2	0	0	0	0	0	0	0	2	10	73	0	0	0	0	0	0	0	0	0	0	0	2	2	0	2	11	2	4	0	0
Variabilichromis_moorii	0	2	40	2	10	0	1	0	0	0	0	1	9	65	0	0	6	0	5	0	0	1	0	0	0	0	2	14	79	0	0	0	0	0	0	0	0	0	0	0	0	0	0	0	10	1	5	0	0
Aulonocranus_dewindti	0	2	35	2	17	0	1	0	0	0	0	0	8	65	0	0	6	0	2	1	0	1	0	0	0	0	2	12	77	0	0	2	0	1	0	0	0	0	0	1	0	4	0	0	7	2	2	0	0
Neolamprologus_hecqui	0	2	27	3	15	0	1	1	0	0	0	1	11	61	0	0	4	0	2	1	0	0	0	0	0	0	1	8	69	0	0	4	1	0	0	0	0	0	0	0	0	5	0	1	7	1	4	0	0
Neolamprologus_nigriventris	0	2	29	1	10	0	1	0	0	0	0	1	13	57	0	0	5	0	2	1	0	0	0	0	0	0	3	11	68	0	0	1	0	0	0	0	1	0	0	0	1	3	0	1	14	5	6	0	0
Tilapia_brevimanus	0	1	59	1	22	1	1	1	0	0	0	1	14	101	0	0	9	0	8	0	0	0	0	0	0	0	2	19	120	0	0	3	0	1	0	0	0	0	0	0	0	4	0	3	29	9	17	0	0
Neolamprologus_sexfasciatus	0	1	33	3	9	0	0	1	0	0	0	0	9	56	0	0	6	0	4	1	0	0	0	0	0	0	2	13	69	0	0	1	0	0	0	1	0	0	0	1	0	3	0	0	8	1	4	0	0
Neolamprologus_modestus	0	1	28	1	12	1	0	1	0	0	0	1	7	52	0	0	7	1	1	0	0	0	0	0	0	0	5	14	66	0	0	4	0	0	0	1	0	0	0	0	1	6	0	0	11	1	5	0	0
Xenotilapia_nasus	0	2	28	1	13	0	1	0	0	0	0	1	10	56	0	1	8	0	3	1	0	0	0	0	0	0	1	14	70	0	0	1	0	0	0	0	0	0	0	0	1	2	0	0	15	1	5	0	0
Neolamprologus_obscurus	0	1	32	3	9	0	1	0	0	0	0	1	6	53	0	0	3	1	3	1	0	0	0	0	0	0	4	12	65	0	0	2	0	2	0	0	0	0	0	0	0	4	0	0	7	0	7	0	0
Lepidiolamprologus_kendalli	0	2	27	3	14	0	1	1	0	0	0	1	8	57	0	0	6	0	0	1	0	0	0	0	0	0	3	10	67	0	0	1	0	2	0	0	0	0	0	0	1	4	0	0	6	0	4	0	0
Telmatochromis_temporalis	0	2	30	1	14	1	1	0	0	0	0	1	7	57	0	0	1	0	2	0	0	0	0	0	0	0	3	6	63	0	0	0	0	0	0	0	1	0	0	0	0	1	0	1	13	3	5	0	0
Benthochromis_melanoides	0	1	22	2	12	1	1	1	0	0	0	1	8	49	0	0	12	0	0	1	0	0	0	0	0	0	3	16	65	0	0	1	0	0	0	0	0	0	0	0	1	2	0	0	6	1	5	0	0
Bathybates_graueri	0	2	33	2	17	1	1	0	0	0	0	1	9	66	0	0	6	0	1	0	0	0	0	0	0	0	1	8	74	0	0	0	0	0	0	0	1	0	0	0	0	1	0	0	13	0	3	0	0
Benthochromis_horii	0	2	26	3	12	0	1	0	0	0	0	1	13	58	0	0	7	3	0	1	0	0	0	0	0	0	3	14	72	0	0	1	0	1	0	0	1	0	0	0	0	3	0	1	12	0	4	0	0
Neolamprologus_sp_kombe_AB-2019	0	2	27	1	9	1	1	1	0	0	0	1	8	51	0	0	4	0	1	0	0	0	0	0	0	0	2	7	58	0	0	2	0	0	0	0	0	0	0	0	1	3	0	1	7	2	3	0	0
Bathybates_leo	0	2	29	2	11	1	0	1	0	0	0	1	10	57	0	0	3	0	2	0	0	0	0	0	0	0	2	7	64	0	0	2	0	4	0	1	0	0	0	0	1	8	0	0	20	0	3	0	0
Julidochromis_sp_kombe_AB-2019	0	1	19	2	9	0	1	1	0	0	0	1	6	40	0	0	6	0	1	1	0	0	0	0	0	0	2	10	50	0	0	1	0	1	0	0	0	0	0	0	0	2	0	0	8	1	3	0	0
Neolamprologus_mustax	0	1	30	3	10	0	1	1	0	0	0	1	8	55	0	1	2	0	0	1	0	0	0	0	0	0	3	7	62	0	0	2	1	3	0	0	0	0	0	0	0	6	0	0	7	0	1	0	0
Telmatochromis_sp_lufubu_AB-2019	0	1	22	5	13	1	1	1	0	0	0	1	6	51	0	0	4	0	1	0	0	0	0	0	0	0	2	7	58	0	1	0	0	0	0	0	0	0	0	0	0	1	0	1	13	0	3	0	0
Neolamprologus_brevis	0	2	18	3	11	1	0	1	0	0	0	1	7	44	0	0	2	0	1	0	0	0	0	0	0	0	4	7	51	0	0	1	0	1	0	0	0	0	0	0	0	2	0	1	4	0	2	0	0
Neolamprologus_calliurus	0	3	26	4	12	0	1	1	0	0	0	1	7	55	0	0	7	0	1	1	0	0	0	0	0	0	2	11	66	0	0	0	0	0	0	0	0	0	0	0	0	0	0	0	13	1	2	0	0
Orthochromis_indermauri	0	3	39	4	15	0	1	1	0	0	0	1	7	71	0	0	8	1	2	1	0	0	0	0	0	0	4	16	87	0	0	0	0	0	0	0	0	0	0	0	2	2	0	1	10	0	9	0	0
Haplochromis_sp_Chipwa	0	1	43	1	20	0	1	1	0	0	0	1	8	76	0	0	8	0	2	0	0	0	0	0	0	0	1	11	87	0	1	1	0	0	1	0	0	0	0	0	0	3	0	0	17	1	4	0	0
Julidochromis_transcriptus	0	1	21	2	8	0	1	1	0	0	0	1	8	43	0	0	6	0	3	1	0	0	0	0	0	0	1	11	54	0	0	1	0	2	0	0	0	0	0	0	0	3	0	0	11	1	2	0	0
Petrochromis_fasciolatus	0	1	35	1	11	0	0	0	0	0	0	1	7	56	0	1	9	0	0	1	0	0	0	0	0	0	1	12	68	0	0	5	0	2	0	1	0	0	0	0	1	9	0	0	15	0	3	0	0
Xenotilapia_sp_papilio_sunflower	0	2	30	6	15	1	1	1	0	0	0	1	6	63	0	0	8	0	2	0	0	0	0	0	0	0	3	13	76	0	1	1	0	1	0	0	0	0	0	0	0	3	0	0	6	0	3	0	0
Neolamprologus_cylindricus	0	2	26	4	10	0	1	1	0	0	0	1	11	56	0	0	3	0	4	1	0	0	0	0	0	0	2	10	66	0	0	1	0	0	0	0	0	0	0	0	1	2	0	1	8	1	6	0	0
Paracyprichromis_nigripinnis	0	2	32	3	16	0	1	1	0	0	0	1	7	63	0	0	8	0	0	0	0	0	0	0	0	0	2	10	73	0	0	0	0	2	0	0	0	0	0	0	0	2	0	1	10	1	3	0	0
Ptychochromis_oligocanthus	0	1	32	3	15	0	1	1	0	0	0	1	9	63	0	0	12	0	2	1	0	0	0	0	0	0	3	18	81	0	0	2	0	1	0	0	0	0	0	0	0	3	0	1	22	0	6	0	0
Trematochromis_benthicola	0	2	28	3	12	1	1	1	0	0	0	1	10	59	0	0	8	0	2	0	0	0	0	0	0	0	2	12	71	0	0	1	0	2	0	0	0	0	0	0	0	3	0	0	12	2	9	0	0
Callochromis_macrops	0	2	30	1	16	0	1	1	0	0	0	1	7	59	0	0	3	0	5	1	0	0	0	0	0	0	4	13	72	0	0	2	0	1	0	0	0	0	0	0	0	3	0	1	23	2	3	0	0
Enantiopus_melanogenys	0	2	37	3	16	1	1	1	0	0	0	1	11	73	0	0	5	0	0	0	0	0	0	0	0	0	0	5	78	0	0	1	0	0	0	0	0	0	0	0	1	2	0	1	8	0	4	0	0
Trematocara_variabile	0	0	11	1	6	0	0	1	0	0	0	0	5	24	0	0	4	0	0	1	0	0	0	0	0	1	2	8	32	0	0	0	0	0	0	1	0	0	0	0	0	1	0	0	5	0	2	0	0
Cyprichromis_sp_kibishi_AB-2019	0	1	22	2	14	1	1	1	0	0	0	1	6	49	0	0	5	0	1	0	0	0	0	0	0	0	3	9	58	0	0	0	0	0	0	0	0	0	0	0	0	0	0	1	7	2	4	0	0
Ophthalmotilapia_heterodonta	0	1	34	1	14	1	1	0	0	0	0	1	7	60	0	0	5	0	4	0	0	0	0	0	0	0	2	11	71	0	0	2	0	0	0	0	1	0	0	0	0	3	0	0	23	0	4	0	0
Chalinochromis_popelini	0	1	21	2	10	0	1	1	0	0	0	0	6	42	0	0	7	0	3	1	0	0	0	0	0	0	3	14	56	0	0	2	0	0	0	0	0	0	0	1	0	3	0	1	7	0	4	0	0
Xenotilapia_sp_kilesa_AB-2019	0	2	32	2	19	0	1	0	0	0	0	1	10	67	0	1	8	0	0	1	0	0	0	0	0	0	0	10	77	0	0	3	1	0	0	0	1	0	0	0	0	5	0	0	10	1	4	0	0
Cyathopharynx_furcifer	0	1	39	1	15	1	1	1	0	0	0	1	10	70	0	0	6	1	1	0	0	0	0	0	0	0	1	9	79	0	0	0	0	0	0	0	0	0	0	0	0	0	0	0	11	0	7	0	0
Ophthalmotilapia_nasuta	0	2	39	1	15	1	1	0	0	0	0	1	8	68	0	0	6	0	3	0	0	1	0	0	0	0	3	13	81	0	0	2	0	2	0	0	0	0	0	0	0	4	0	0	10	2	5	0	0
Ctenochromis_horei	0	2	50	3	17	0	1	1	0	0	0	1	7	82	0	0	6	0	1	1	0	0	0	0	0	0	3	11	93	0	0	2	0	1	0	0	0	0	0	0	0	3	0	0	12	2	6	0	0
Xenotilapia_spiloptera	0	2	33	6	13	0	1	1	0	0	0	1	8	65	0	0	10	0	0	0	0	0	0	0	0	0	0	10	75	0	0	2	0	2	0	0	0	0	0	0	0	4	0	1	11	0	2	1	0
Limnotilapia_dardennii	0	1	43	0	12	0	1	1	0	0	0	0	8	66	0	0	7	0	3	0	0	0	0	0	0	0	1	11	77	0	1	1	0	1	0	0	0	0	0	1	0	4	0	1	15	4	7	0	0
Petrochromis_polyodon	0	2	37	2	16	0	1	1	0	0	0	1	9	69	0	0	12	2	2	1	0	0	0	0	0	0	3	20	89	0	0	3	0	0	0	0	0	0	0	0	0	3	0	1	16	0	4	0	0
Lepidiolamprologus_attenuatus	0	2	28	2	17	0	1	0	0	0	0	1	7	58	0	0	8	0	0	0	0	0	0	0	0	0	4	12	70	0	0	2	0	1	0	0	1	0	0	0	0	4	0	0	11	2	3	0	0
Neolamprologus_crassus	0	2	32	1	14	1	1	1	0	0	0	1	6	59	0	0	2	1	2	0	0	0	0	0	0	0	2	7	66	0	0	2	0	0	0	0	0	0	0	0	0	2	0	1	7	0	2	0	0
Xenotilapia_bathyphilus	0	2	34	2	13	1	1	0	0	0	0	1	10	64	0	0	6	0	0	0	0	0	0	0	0	0	2	8	72	0	0	0	0	0	0	0	0	0	0	0	1	1	0	0	8	2	3	0	0
Reganochromis_calliurus	0	2	34	0	17	1	1	1	0	0	0	1	7	64	0	0	10	0	4	0	0	0	0	0	0	0	2	16	80	0	0	2	0	1	0	0	0	0	0	0	0	3	0	1	14	4	7	0	0
Trematocara_nigrifrons	0	1	17	3	6	0	1	1	0	0	0	1	5	35	0	0	7	0	0	1	0	0	0	0	0	0	3	11	46	0	0	0	0	0	0	0	0	0	0	0	0	0	0	0	4	0	1	0	0
Trematocara_macrostoma	0	1	15	1	7	1	1	1	0	0	0	1	7	35	0	0	1	1	1	0	0	0	0	0	0	0	1	4	39	0	0	1	0	0	0	0	0	0	0	0	0	1	0	0	5	0	3	0	0
Bathybates_fasciatus	0	2	41	1	14	1	1	1	0	0	0	1	12	74	0	0	4	0	3	0	0	0	0	0	0	0	2	9	83	0	0	5	0	0	0	0	0	0	0	0	0	5	0	0	9	0	2	0	0
Neolamprologus_christyi	0	1	27	3	15	1	1	1	0	0	0	1	8	58	0	0	4	1	3	0	0	0	0	0	0	0	3	11	69	0	0	3	0	0	0	0	0	0	0	0	0	3	0	1	6	1	1	0	0
Limnochromis_staneri	0	3	49	3	17	1	0	1	0	0	0	1	9	84	0	0	4	1	0	0	0	0	0	0	0	0	3	8	92	0	0	0	0	1	0	1	0	0	0	0	2	4	0	0	7	1	7	0	0
Gnathochromis_permaxillaris	0	3	31	1	15	0	1	1	0	0	0	1	10	63	0	0	8	2	1	0	0	0	0	0	0	0	5	16	79	0	1	1	0	1	1	0	0	0	0	0	1	5	0	0	16	1	6	0	0
Limnochromis_auritus	0	3	30	2	19	0	1	1	0	0	0	1	10	67	0	0	7	1	0	1	0	0	0	0	0	0	3	12	79	0	0	3	0	0	0	0	0	0	0	0	0	3	0	0	13	4	7	0	0
Lobochilotes_labiatus	0	2	35	2	13	0	1	1	0	0	0	1	7	62	0	0	9	0	1	1	0	0	0	0	0	0	2	13	75	0	0	4	0	1	0	0	0	0	0	0	1	6	0	0	12	2	4	0	0
Cyprichromis_leptosoma	0	2	30	3	13	1	1	0	0	0	0	1	7	58	0	0	7	0	1	0	0	1	0	0	0	0	5	14	72	0	0	1	0	0	0	0	0	0	0	0	0	1	0	0	8	0	6	0	0
Altolamprologus_compressiceps	0	2	28	3	16	1	1	1	0	0	0	1	8	61	0	0	4	1	1	0	0	0	0	0	0	0	3	9	70	0	0	2	0	0	0	0	0	0	0	0	0	2	0	1	9	1	3	0	0
Julidochromis_ornatus	0	1	26	2	14	0	1	1	0	0	0	1	7	53	0	0	7	1	1	1	0	0	0	0	0	0	2	12	65	0	0	1	0	0	0	0	0	0	0	0	1	2	0	0	6	1	0	0	0
Neolamprologus_pulcher	0	2	24	1	9	0	0	1	0	0	0	0	10	47	0	0	5	0	2	1	0	0	0	0	0	0	2	10	57	0	0	0	0	1	0	0	0	0	0	1	0	2	0	0	7	2	7	0	0
Neolamprologus_savoryi	0	1	30	5	8	1	1	0	0	0	0	1	7	54	0	1	2	0	3	0	0	0	0	0	0	0	5	11	65	0	0	0	0	0	0	0	1	0	0	0	0	1	0	0	13	0	7	0	0
Trematocara_marginatum	0	1	17	2	5	0	1	1	0	0	0	1	7	35	0	0	4	0	0	1	0	0	0	0	0	0	1	6	41	0	0	2	1	0	0	0	0	0	0	0	0	3	0	0	4	0	2	0	0
Telmatochromis_sp_shell_AB-2019	0	2	25	2	11	1	1	1	0	0	0	1	8	52	0	0	2	0	4	0	0	0	0	0	0	0	2	8	60	0	0	2	0	0	0	0	0	0	0	0	0	2	0	1	9	5	3	0	0
Altolamprologus_sp_compressiceps_shell_AB-2019	0	1	26	3	10	0	1	0	0	0	0	1	6	48	0	0	3	0	2	1	0	1	0	0	0	0	2	9	57	0	0	0	0	1	0	0	0	0	0	0	0	1	0	0	6	2	6	0	0
Neolamprologus_multifasciatus	0	1	28	4	11	1	1	1	0	0	0	1	4	52	0	0	8	0	1	0	0	0	0	0	0	0	1	10	62	0	0	2	0	3	0	0	0	0	0	0	0	5	0	1	13	1	3	0	0
Xenotilapia_singularis	0	2	29	2	15	0	0	0	0	0	0	0	9	57	0	0	5	1	0	1	0	0	0	0	0	0	3	10	67	0	0	0	0	0	0	1	0	0	0	1	0	2	0	0	17	1	5	0	0
Ectodus_descampsii	0	2	35	4	15	0	1	1	0	0	0	1	8	67	0	0	3	0	3	0	0	0	0	0	0	0	2	8	75	0	0	2	0	0	1	0	0	0	0	0	0	3	0	0	12	1	3	0	0
Julidochromis_dickfeldi	0	1	26	4	11	1	1	1	0	0	0	1	7	53	0	0	4	0	1	0	0	0	0	0	0	0	2	7	60	0	0	1	0	1	0	0	0	0	0	0	0	2	0	0	13	0	3	0	0
Julidochromis_sp_regani_south_AB-2019	0	2	25	4	9	0	1	1	0	0	0	1	5	48	0	0	7	0	0	1	0	0	0	0	0	0	3	11	59	0	0	1	0	2	0	0	0	0	0	0	1	4	0	0	9	1	5	0	0
Lestradea_perspicax	0	1	34	1	14	1	1	1	0	0	0	1	8	62	0	1	8	1	5	0	0	0	0	0	0	0	3	18	80	0	0	0	0	0	0	0	0	0	0	0	1	1	0	0	10	4	1	0	0
Ophthalmotilapia_ventralis	0	2	35	2	17	1	1	1	0	0	0	1	6	66	0	0	7	0	1	0	0	0	0	0	0	0	2	10	76	0	0	2	0	0	0	0	0	0	0	0	1	3	0	0	12	2	3	0	0
Perissodus_microlepis	0	2	33	0	17	1	1	0	0	0	0	1	13	68	0	1	7	1	0	0	0	0	0	0	0	0	2	11	79	0	0	2	0	0	0	0	1	0	0	0	2	5	0	0	9	2	3	0	0
Paracyprichromis_sp_brieni_south_AB-2019	0	1	28	3	12	0	1	1	0	0	0	1	4	51	0	0	3	0	3	0	0	0	0	0	0	0	3	9	60	0	0	2	0	1	1	0	0	0	0	0	0	4	0	2	8	2	6	0	0
Haplotaxodon_microlepis	0	2	40	4	15	1	1	1	0	0	0	1	11	76	0	0	6	0	2	0	0	0	0	0	0	0	4	12	88	0	0	2	0	1	0	0	0	0	0	0	0	3	0	1	6	2	7	0	0
Haplotaxodon_trifasciatus	0	2	31	2	16	1	0	1	0	0	0	0	12	65	0	0	6	0	1	0	0	0	0	0	0	0	3	10	75	0	0	2	0	1	0	0	0	0	0	0	0	3	0	0	10	4	5	0	0
Neolamprologus_caudopunctatus	0	2	31	5	13	0	1	1	0	0	0	1	9	63	0	0	5	0	2	1	0	0	0	0	0	0	3	11	74	0	0	1	0	0	0	0	0	0	0	0	1	2	0	1	6	1	7	0	0
Neolamprologus_tetracanthus	0	2	36	4	11	0	1	1	0	0	0	1	8	64	0	0	2	1	1	1	0	0	0	0	0	0	4	9	73	0	1	1	0	2	0	0	0	0	0	0	0	4	0	0	10	0	5	0	0
Xenotilapia_boulengeri	0	2	36	3	16	0	0	1	0	0	0	1	11	70	0	0	4	0	1	1	1	0	0	0	0	0	2	9	79	0	0	0	0	0	0	0	0	0	0	0	0	0	0	0	15	2	5	0	0
Petrochromis_trewavasae_ephippium	0	2	41	2	14	0	1	1	0	0	0	1	8	70	0	1	8	0	1	1	0	0	0	0	0	0	3	14	84	0	0	1	0	0	0	0	0	0	0	0	0	1	0	0	14	1	3	0	0
Interochromis_loocki	0	1	44	1	17	0	1	1	0	0	0	1	7	73	0	1	8	0	2	1	0	0	0	0	0	0	3	15	88	0	0	2	0	1	0	0	0	0	0	0	1	4	0	1	19	1	7	0	0
Lepidiolamprologus_cunningtoni	0	1	32	3	11	0	1	1	0	0	0	1	7	57	0	0	8	0	0	1	0	0	0	0	0	0	1	10	67	0	0	2	0	1	0	0	0	0	0	0	0	3	0	0	4	2	7	0	0
Tropheus_sp_red_AB-2019	0	1	29	2	14	0	0	1	0	0	0	1	6	54	0	1	13	0	0	1	0	0	0	0	0	0	3	18	72	0	1	1	0	1	0	0	0	0	0	0	1	4	0	0	20	0	5	0	1
Cyathopharynx_foae	0	1	33	1	14	0	1	0	0	0	0	1	8	59	0	0	4	0	2	1	0	1	0	0	0	0	1	9	68	0	1	0	0	0	0	0	0	0	0	0	1	2	0	1	6	0	3	0	0
Cyphotilapia_gibberosa	0	3	37	3	16	1	1	1	0	0	0	1	9	72	0	0	6	0	3	0	0	0	0	0	0	0	2	11	83	0	0	1	0	1	0	0	0	0	0	0	0	2	0	1	10	1	5	0	0
Cyprichromis_sp_jumbo_AB-2019	0	1	29	1	15	1	1	1	0	0	0	1	6	56	0	0	8	0	3	0	0	0	0	0	0	0	2	13	69	0	1	0	0	0	0	0	0	0	0	0	1	2	0	1	7	2	2	0	0
Plecodus_straeleni	0	2	41	3	15	1	1	1	0	0	0	1	14	79	0	0	11	1	3	0	0	0	0	0	0	0	5	20	99	0	0	1	1	0	0	0	0	0	0	0	0	2	0	1	7	2	6	0	0
Xenotilapia_leptura	0	2	33	4	16	0	0	1	0	0	0	1	11	68	0	0	5	0	0	1	0	0	0	0	0	0	5	11	79	0	0	0	0	1	0	1	0	0	0	0	1	3	0	1	16	1	4	0	0
Xenotilapia_rotundiventralis	0	1	31	2	15	0	1	0	0	0	0	1	12	63	0	0	10	0	2	1	0	1	0	0	0	0	3	17	80	0	0	1	0	1	0	0	0	0	0	0	0	2	0	0	11	2	3	0	0
Xenotilapia_flavipinnis	0	2	30	2	14	1	1	1	0	0	0	1	16	68	0	0	6	0	1	0	0	0	0	0	0	0	1	8	76	0	0	2	0	0	0	0	0	0	0	0	0	2	0	0	16	1	4	0	0
Perissodus_multidentatus	0	3	31	3	15	0	0	1	0	0	0	1	10	64	0	0	11	0	1	1	1	0	0	0	0	0	4	18	82	0	0	1	1	0	0	0	0	0	0	0	1	3	0	0	7	1	2	0	0
Xenotilapia_nigrolabiata	0	2	33	3	15	1	1	1	0	0	0	1	13	70	0	0	9	0	3	0	0	0	0	0	0	0	1	13	83	0	0	1	0	1	0	0	0	0	0	0	0	2	0	1	11	0	8	0	0
Hemibates_stenosoma	0	2	27	1	14	0	1	1	0	0	0	1	7	54	0	0	4	0	1	1	0	0	0	0	0	0	2	8	62	0	0	2	0	1	0	0	0	0	0	0	2	5	0	0	7	1	2	0	0
Xenotilapia_caudafasciata	0	1	28	2	17	0	1	1	0	0	0	1	10	61	0	0	8	0	0	1	0	0	0	0	0	0	1	10	71	0	0	0	0	0	0	0	0	0	0	0	0	0	0	1	12	1	4	0	0
Greenwoodochromis_bellcrossi	0	3	30	4	11	1	1	1	0	0	0	1	11	63	0	0	7	0	2	0	0	0	0	0	0	0	2	11	74	0	0	3	0	0	0	0	0	0	0	0	0	3	0	0	12	4	6	0	0
Trematocara_unimaculatum	0	1	20	4	6	0	1	1	0	0	0	1	8	42	0	0	7	0	0	0	0	0	0	0	0	0	1	8	50	0	0	3	0	0	0	0	0	0	0	0	0	3	0	1	5	0	2	0	0
Cunningtonia_longiventralis	0	0	36	4	17	0	1	1	0	0	0	1	7	67	0	1	6	0	1	1	0	0	0	0	0	0	4	13	80	0	1	0	0	0	0	0	0	0	0	0	0	1	0	0	10	0	1	0	0
Lamprologus_signatus	0	2	29	5	12	1	1	1	0	0	0	1	12	64	0	0	4	0	0	0	0	0	0	0	0	0	0	4	68	0	0	1	0	0	0	0	0	0	0	0	1	2	0	1	7	1	2	0	0
Petrochromis_horii	0	2	39	3	15	0	1	1	0	0	0	1	9	71	0	1	10	0	3	0	0	0	0	0	0	0	3	17	88	0	0	3	0	0	0	0	0	0	0	0	1	4	0	0	20	0	4	0	0
Neolamprologus_prochilus	0	0	31	1	13	0	1	1	0	0	0	1	9	57	0	0	3	0	0	1	0	0	0	0	0	0	4	8	65	0	0	0	0	0	0	0	0	0	0	0	0	0	0	2	10	1	9	0	0
Haplochromis_vanheusdeni	0	2	38	4	14	0	1	1	0	0	0	1	10	71	0	0	5	0	2	1	0	0	0	0	0	0	2	10	81	0	0	2	0	0	0	0	0	0	0	0	0	2	0	1	20	3	3	0	0
Tropheus_annectens	0	2	36	2	18	0	1	1	0	0	0	1	9	70	0	0	9	0	0	1	0	0	0	0	0	0	2	12	82	0	0	1	0	0	0	0	0	0	0	0	0	1	0	1	15	4	4	0	0
Xenotilapia_papilio	0	1	29	3	10	1	1	1	0	0	0	1	11	58	0	0	8	0	5	0	0	0	0	0	0	0	1	14	72	0	0	0	0	1	0	0	0	0	0	0	1	2	0	0	16	1	5	0	0
Thoracochromis_brauschi	0	2	45	2	17	0	1	1	0	0	0	1	8	77	0	0	7	0	2	1	0	0	0	0	0	0	3	13	90	0	0	0	0	0	0	0	0	0	0	0	1	1	0	1	13	2	4	0	0
Sargochromis_carlottae	0	2	48	2	9	0	1	1	0	0	0	1	8	72	0	0	2	1	4	1	0	0	0	0	0	0	3	11	83	0	0	0	0	0	0	0	0	0	0	0	0	0	0	1	15	3	4	0	0
Coptodon_bakossiorum	0	2	61	3	25	0	1	1	0	0	0	1	19	113	0	0	5	0	3	1	0	0	0	0	0	0	4	13	126	0	0	4	0	1	0	0	0	0	0	0	0	5	0	0	34	2	17	0	0
Pelmatolapia_mariae	0	1	61	4	23	1	1	1	0	0	0	1	12	105	0	0	9	0	9	0	0	0	0	0	0	0	5	23	128	0	1	4	1	1	0	0	0	0	0	0	0	7	0	1	35	2	16	0	0
Serranochromis_macrocephalus	0	2	41	3	11	0	1	1	0	0	0	1	8	68	0	1	5	1	2	1	0	0	0	0	0	0	3	13	81	0	0	0	0	0	0	0	0	0	0	0	1	1	0	0	20	2	9	0	0
Bujurquina_vittata	0	3	42	3	29	1	1	1	0	0	0	1	12	93	0	0	6	0	3	0	0	0	0	0	0	0	5	14	107	0	0	3	0	1	0	0	0	0	0	0	1	5	0	2	36	4	12	0	0
Paratilapia_polleni	0	2	43	3	23	1	1	1	0	0	0	1	11	86	0	0	7	0	0	0	0	0	0	0	0	0	3	10	96	0	0	5	0	0	0	0	0	0	0	0	0	5	0	0	21	0	11	0	0
Etia_nguti	0	2	40	3	21	1	1	1	0	0	0	1	10	80	0	1	8	0	1	0	0	0	0	0	0	0	3	13	93	0	0	1	0	2	0	0	0	0	0	0	1	4	0	0	27	0	11	0	0
Etroplus_canarensis	0	3	44	3	16	1	1	1	0	0	0	1	8	78	0	0	9	0	4	0	0	0	0	0	0	0	3	16	94	0	0	2	0	1	0	0	0	0	0	0	1	4	0	0	35	0	10	0	0
Xenotilapia_ochrogenys	0	2	35	2	16	0	1	1	0	0	0	1	9	67	0	0	9	3	0	1	0	0	0	0	0	0	1	14	81	0	0	0	0	1	0	0	0	0	0	0	0	1	0	1	12	1	3	0	0
Lestradea_stappersii	0	1	36	2	13	1	1	0	0	0	0	1	7	62	0	0	7	0	2	0	0	0	0	0	0	0	3	12	74	0	2	1	0	3	0	0	0	0	0	0	0	6	0	0	6	2	7	0	0
Cyprichromis_microlepidotus	0	2	26	2	15	1	1	1	0	0	0	1	8	57	0	0	6	0	0	0	0	0	0	0	0	0	3	9	66	0	0	1	1	0	0	0	0	0	0	0	0	2	0	0	3	3	4	0	0
Neolamprologus_mondabu	0	1	31	2	13	0	1	1	0	0	0	1	9	59	0	0	3	0	3	0	0	0	0	0	0	0	2	8	67	0	0	1	0	0	1	0	0	0	0	0	0	2	0	0	11	0	6	0	0
Pseudosimochromis_babaulti	0	2	43	3	15	0	1	1	0	0	0	1	10	76	0	0	10	0	4	0	0	0	0	0	0	0	1	15	91	0	0	2	0	1	0	0	0	0	0	0	1	4	0	1	13	1	4	0	0
Neolamprologus_buescheri	0	1	30	3	10	0	1	1	0	0	0	1	8	55	0	0	2	0	2	1	0	0	0	0	0	0	3	8	63	0	0	3	0	1	0	0	0	0	0	0	0	4	0	1	13	0	3	0	0
Triglachromis_otostigma	0	2	34	1	14	0	1	1	0	0	0	1	12	66	0	0	9	3	3	0	0	0	0	0	0	0	2	17	83	0	0	3	0	1	1	0	0	0	0	0	0	5	0	1	10	1	7	0	0
Neolamprologus_sp_ventralis_stripe_AB-2019	0	2	23	2	14	0	1	1	0	0	0	1	6	50	0	0	4	0	1	1	0	0	0	0	0	0	5	11	61	0	1	0	0	0	0	0	0	0	0	0	0	1	0	0	9	1	4	0	0
Cyprichromis_coloratus	0	2	26	4	16	1	1	1	0	0	0	1	11	63	0	0	7	0	2	0	0	0	0	0	0	0	1	10	73	0	0	2	0	0	0	0	0	0	0	0	0	2	0	1	7	1	4	0	0
Plecodus_paradoxus	0	3	33	4	14	1	1	1	0	0	0	1	7	65	0	0	10	0	0	0	0	0	0	0	0	0	7	17	82	0	0	1	0	0	0	0	0	0	0	0	0	1	0	0	10	1	8	0	0
Lamprologus_laparogramma	0	2	30	3	15	1	1	1	0	0	0	1	8	62	0	0	5	0	0	0	0	0	0	0	0	0	1	6	68	0	0	2	0	1	0	0	0	0	0	0	0	3	0	1	6	3	3	0	0
Neolamprologus_meeli	0	2	26	2	12	0	0	0	0	0	0	1	11	54	0	0	3	0	0	1	0	0	0	0	0	0	1	5	59	0	0	0	1	0	0	1	1	0	0	0	1	4	0	1	12	4	5	0	0
Lamprologus_sp_ornatipinnis_zambia_AB-2019	0	2	26	3	11	0	1	1	0	0	0	1	6	51	0	0	4	0	2	1	0	0	0	0	0	0	3	10	61	0	0	1	0	0	0	0	0	0	0	0	1	2	0	0	10	1	3	0	0
Bathybates_vittatus	0	1	33	1	16	1	0	0	0	0	0	0	11	63	0	0	2	0	2	0	0	0	0	0	0	0	3	7	70	0	0	1	0	0	0	1	0	0	0	1	1	4	0	1	19	1	3	0	0
Bathybates_hornii	0	2	30	1	17	1	1	0	0	0	0	1	9	62	0	0	3	0	2	0	0	0	0	0	0	0	5	10	72	0	0	2	0	0	0	0	0	0	0	0	1	3	0	0	20	0	4	0	0
Grammatotria_lemairii	0	3	30	4	17	0	1	1	0	0	0	1	8	65	0	0	8	1	3	1	0	0	0	0	0	0	3	16	81	0	0	1	0	0	0	0	0	0	0	0	1	2	0	0	11	2	9	0	0
Boulengerochromis_microlepis	0	2	44	4	20	0	1	1	0	0	0	1	10	83	0	1	10	0	6	1	0	0	0	0	0	0	8	26	109	0	0	1	0	1	0	0	0	0	0	0	1	3	0	1	17	3	13	0	0
Telmatochromis_vittatus	0	2	33	2	12	0	1	1	0	0	0	1	10	62	0	0	4	0	1	1	0	0	0	0	0	0	5	11	73	0	0	0	0	0	0	0	0	0	0	0	1	1	0	1	9	1	4	0	0
Bathybates_minor	0	1	27	1	14	1	1	1	0	0	0	1	7	54	0	0	7	0	1	0	0	0	0	0	0	0	2	10	64	0	0	2	0	0	0	0	0	0	0	0	0	2	0	0	10	0	3	0	0
Telmatochromis_brachygnathus	0	2	30	2	10	0	1	1	0	0	0	1	8	55	0	0	3	1	2	1	0	0	0	0	0	0	3	10	65	0	0	0	0	1	0	0	0	0	0	0	0	1	0	0	6	2	2	0	0
Xenochromis_hecqui	0	1	33	2	14	1	1	1	0	0	0	1	13	67	0	0	10	0	2	0	0	0	0	0	0	0	3	15	82	0	1	4	0	0	0	0	0	0	0	0	1	6	0	0	9	1	4	0	0
Tylochromis_polylepis	0	1	41	2	25	0	1	1	0	0	0	1	8	80	0	0	17	0	1	1	0	0	0	0	0	0	4	23	103	0	1	0	0	0	0	0	0	0	0	0	1	2	0	0	23	2	3	0	0
Baileychromis_centropomoides	0	2	33	4	8	1	1	1	0	0	0	1	7	58	0	0	11	0	0	0	0	0	0	0	0	0	3	14	72	0	0	0	0	1	0	0	0	0	0	0	0	1	0	1	9	0	6	0	0
Lamprologus_lemairii	0	2	24	2	10	0	1	1	0	0	0	1	8	49	0	0	4	0	2	1	0	0	0	0	0	0	3	10	59	0	0	2	0	0	0	0	0	0	0	0	1	3	0	1	10	0	4	0	0
Eretmodus_cyanostictus	0	2	41	7	13	1	1	1	0	0	0	1	12	79	0	0	8	1	5	0	0	0	0	0	0	0	4	18	97	0	0	2	0	0	0	0	0	0	0	0	0	2	0	0	9	1	3	0	0
Greenwoodochromis_christyi	0	2	27	3	12	0	1	1	0	0	0	1	9	56	0	1	10	0	4	0	0	0	0	0	0	0	2	17	73	0	0	2	1	0	0	0	0	0	0	0	2	5	0	1	10	1	10	0	0
Perissodus_eccentricus	0	3	34	4	13	1	1	1	0	0	0	1	13	71	0	0	5	0	0	0	0	0	0	0	0	0	0	5	76	0	0	0	0	0	0	0	0	0	0	0	1	1	0	0	10	2	6	0	0
Trematocara_stigmaticum	0	1	16	2	6	0	1	0	0	0	0	1	7	34	0	0	4	0	0	1	0	0	0	0	0	0	1	6	40	0	0	2	0	0	0	0	1	0	0	0	0	3	0	0	7	0	1	0	0
Julidochromis_marlieri	0	1	24	3	13	1	1	1	0	0	0	1	9	54	0	0	2	0	0	0	0	0	0	0	0	0	3	5	59	0	0	2	0	1	0	0	0	0	0	0	0	3	0	0	10	0	1	0	0
Petrochromis_famula	0	1	37	2	14	1	0	1	0	0	0	1	6	63	0	1	11	0	2	0	0	0	0	0	0	0	2	16	79	0	0	7	0	1	0	1	0	0	0	0	1	10	0	0	11	1	1	0	0
Neolamprologus_longicaudatus	0	1	32	3	12	1	1	1	0	0	0	1	6	58	0	0	2	1	3	0	0	0	0	0	0	0	2	8	66	0	0	1	0	1	0	0	0	0	0	0	1	3	0	0	9	2	3	0	0
Pelvicachromis_taeniatus	0	2	38	3	15	1	1	0	0	0	0	1	9	70	0	1	3	1	3	0	0	0	0	0	0	0	3	11	81	0	0	1	0	3	0	0	0	0	0	0	0	4	0	1	15	1	7	0	0
Neolamprologus_leleupi	0	1	25	2	13	0	1	1	0	0	0	1	10	54	0	1	6	0	1	1	0	0	0	0	0	0	1	10	64	0	0	0	1	0	0	0	0	0	0	0	0	1	0	0	11	2	7	0	0
Neolamprologus_olivaceous	0	2	30	4	12	1	1	1	0	0	0	1	7	59	0	0	3	0	2	0	0	0	0	0	0	0	2	7	66	0	0	2	0	1	0	0	0	0	0	0	0	3	0	1	6	0	5	0	0
Neolamprologus_gracilis	0	2	31	4	11	0	1	1	0	0	0	1	11	62	0	0	4	0	3	1	0	0	0	0	0	0	1	9	71	0	0	0	0	0	0	0	0	0	0	0	1	1	0	1	6	1	6	0	0
Neolamprologus_marunguensis	0	2	38	1	10	0	1	0	0	0	0	1	9	62	0	0	3	0	2	1	0	0	0	0	0	0	1	7	69	0	0	2	0	0	0	0	1	0	0	0	1	4	0	1	8	0	3	0	0
Neolamprologus_helianthus	0	2	29	4	12	0	1	1	0	0	0	1	9	59	0	0	2	0	3	1	0	0	0	0	0	0	4	10	69	0	0	0	0	0	0	0	0	0	0	0	0	0	0	0	11	0	3	0	0
Tilapia_sparmanii	0	2	63	7	23	0	1	1	0	0	0	1	13	111	0	0	13	0	2	1	0	0	0	0	0	0	5	21	132	0	0	2	0	3	0	0	0	0	0	0	0	5	0	1	26	0	16	0	0
Lamprologus_tigripictilis	0	0	29	3	14	1	1	0	0	0	0	1	8	57	0	0	6	0	3	0	0	0	0	0	0	0	2	11	68	0	0	0	0	0	0	0	1	0	0	0	1	2	0	1	11	0	1	0	0
Pharyngochromis_acuticeps	0	2	33	3	15	0	1	1	0	0	0	1	10	66	0	1	8	0	2	1	0	0	0	0	0	0	5	17	83	0	0	2	0	0	0	0	0	0	0	0	0	2	0	0	11	3	7	0	0
Heterochromis_multidens	0	2	33	2	21	0	1	1	0	0	0	1	8	69	0	0	10	0	3	1	0	0	0	0	0	0	2	16	85	0	0	2	0	1	0	0	0	0	0	0	3	6	0	0	18	0	4	0	0
Hemichromis_elongatus	0	3	63	1	27	1	1	1	0	0	0	1	11	109	0	0	5	0	7	0	0	0	0	0	0	0	5	17	126	0	0	5	0	0	0	0	0	0	0	0	0	5	0	1	32	5	11	0	0
Steatocranus_sp_ultraslender_AB-2019	0	2	39	2	14	0	1	1	0	0	0	1	10	70	0	0	2	1	0	1	0	0	0	0	0	0	1	5	75	0	0	2	0	0	0	0	0	0	0	0	1	3	0	0	13	2	7	0	0
Coptodon_rendalli	0	1	60	2	25	0	1	1	0	0	0	1	13	104	0	1	11	1	4	1	0	0	0	0	0	0	4	22	126	0	0	4	1	0	0	0	0	0	0	0	0	5	0	1	22	1	27	0	0
Heterotilapia_buettikoferi	0	3	50	1	22	1	1	1	0	0	0	1	12	92	0	0	9	0	3	0	0	0	0	0	0	0	6	18	110	0	0	6	1	1	0	0	0	0	0	0	3	11	0	0	41	6	17	0	0
Amphilophus_zaliosus	0	2	35	2	16	0	1	0	0	0	0	1	10	67	0	0	4	0	5	1	0	1	0	0	0	0	3	14	81	0	0	2	0	1	0	0	0	0	0	0	0	3	0	1	44	3	7	0	0
Australoheros_scitulus	0	3	44	3	18	1	1	1	0	0	0	1	13	85	0	0	12	0	2	0	0	0	0	0	0	0	1	15	100	0	0	3	0	2	0	0	0	0	0	0	1	6	0	1	32	5	9	0	0
Andinoacara_biseriatus	0	2	51	2	17	1	1	1	0	0	0	1	13	89	0	0	9	3	3	0	0	0	0	0	0	0	6	21	110	0	0	6	0	1	0	0	0	0	0	0	0	7	0	1	50	3	3	0	0
Paracyprichromis_sp_tembwe_AB-2019	0	3	28	3	13	0	1	1	0	0	0	1	4	54	0	0	6	0	1	1	0	0	0	0	0	0	2	10	64	0	0	1	0	0	0	0	0	0	0	0	1	2	0	0	9	1	6	0	0
Telmatochromis_sp_longola_AB-2019	0	2	31	1	15	1	1	0	0	0	0	1	12	64	0	0	1	0	0	0	0	0	0	0	0	0	3	4	68	0	1	0	0	1	0	0	0	0	0	0	2	4	0	1	5	2	5	0	0
Neolamprologus_variostigma	0	2	26	2	11	0	1	0	0	0	0	1	12	55	0	0	7	0	3	1	0	0	0	0	0	0	3	14	69	0	0	2	0	0	0	0	0	0	0	0	0	2	0	1	7	3	8	0	0
Lamprologus_meleagris	0	2	28	1	15	0	0	0	0	0	0	0	7	53	0	0	5	0	4	1	0	0	0	0	0	0	1	11	64	0	1	1	0	0	0	0	0	0	0	1	1	4	0	0	13	4	2	0	2
Neolamprologus_pectoralis	0	1	27	3	10	0	1	1	0	0	0	1	13	57	0	0	3	0	0	1	0	0	0	0	0	0	2	6	63	0	0	0	0	0	0	0	0	0	0	0	0	0	0	0	10	2	7	0	0
Lamprologus_sp_ornatipinnis_congo_AB-2019	0	2	23	2	14	0	1	1	0	0	0	1	11	55	0	0	4	0	2	1	0	0	0	0	0	0	0	7	62	0	0	1	0	0	0	0	0	0	0	0	0	1	0	0	9	2	4	0	0
Telmatochromis_brichardi	0	2	28	3	14	0	1	1	0	0	0	0	8	57	0	0	3	1	1	1	0	0	0	0	0	0	1	7	64	0	0	1	0	0	0	0	0	0	0	1	0	2	0	0	11	1	4	0	0
Spathodus_erythrodon	0	2	32	2	14	1	1	0	0	0	0	1	7	60	0	0	6	0	3	0	0	1	0	0	0	0	2	12	72	0	0	1	0	0	0	0	0	0	0	0	0	1	0	0	10	2	3	0	0
Telmatochromis_sp_dhonti_north_AB-2019	0	2	31	2	10	1	1	1	0	0	0	1	8	57	0	0	5	0	6	0	0	0	0	0	0	0	4	15	72	0	0	1	0	0	0	0	0	0	0	0	0	1	0	1	12	0	6	0	0
Neolamprologus_furcifer	0	2	30	3	11	0	1	1	0	0	0	1	7	56	0	0	2	0	2	1	0	0	0	0	0	0	3	8	64	0	0	0	0	1	0	0	0	0	0	0	0	1	0	0	10	0	4	0	0
Neolamprologus_chitamwebwai	0	2	31	1	12	1	1	0	0	0	0	1	8	57	0	0	4	0	2	0	0	0	0	0	0	0	1	7	64	0	0	0	0	0	0	0	0	0	0	0	0	0	0	0	10	0	6	0	0
Neolamprologus_tretocephalus	0	2	28	2	13	0	1	1	0	0	0	1	6	54	0	0	4	0	2	1	0	0	0	0	0	0	2	9	63	0	0	2	0	0	0	0	0	0	0	0	1	3	0	0	11	0	4	0	0
Tropheus_duboisi	0	2	35	2	16	0	1	1	0	0	0	1	9	67	0	0	13	0	2	1	0	0	0	0	0	0	2	18	85	0	0	3	0	1	0	0	0	0	0	0	0	4	0	1	18	3	3	0	0
Julidochromis_regani	0	1	26	2	10	0	1	1	0	0	0	1	10	52	0	0	5	0	0	0	0	0	0	0	0	0	1	6	58	0	0	1	0	1	1	0	0	0	0	0	0	3	0	0	4	0	3	0	0
Neolamprologus_walteri	0	2	32	3	11	1	0	1	0	0	0	1	8	59	0	0	4	0	2	0	0	0	0	0	0	0	3	9	68	0	0	1	0	0	0	1	0	0	0	0	0	2	0	0	4	0	5	0	0
Tropheus_sp_lukuga_AB-2019	0	2	42	4	13	0	1	1	0	0	0	1	10	74	0	0	14	0	3	1	0	0	0	0	0	0	0	18	92	0	0	0	0	1	0	0	0	0	0	0	1	2	0	0	6	2	5	0	0
Cyprichromis_sp_dwarf_jumbo_AB-2019	0	2	27	2	16	1	1	1	0	0	0	1	6	57	0	0	5	1	2	0	0	0	0	0	0	0	1	9	66	0	0	1	0	1	0	0	0	0	0	0	0	2	0	0	5	2	1	0	0
Chalinochromis_sp_ndobhoi_AB-2019	0	2	26	3	11	1	1	1	0	0	0	1	6	52	0	0	5	0	1	0	0	0	0	0	0	0	2	8	60	0	0	2	0	1	0	0	0	0	0	0	0	3	0	1	13	0	7	0	0
Neolamprologus_longior	0	2	30	2	9	0	1	1	0	0	0	1	8	54	0	1	4	0	2	1	0	0	0	0	0	0	3	11	65	0	0	0	0	0	0	0	0	0	0	0	0	0	0	0	7	0	4	0	0
Tropheus_sp_lunatus_AB-2019	0	2	35	4	15	0	0	0	0	0	0	1	7	64	0	0	11	0	0	1	0	0	0	0	0	0	0	12	76	0	0	4	1	0	0	0	1	0	0	0	0	6	0	1	13	1	2	0	0
Neolamprologus_similis	0	2	30	3	17	1	1	1	0	0	0	1	3	59	0	0	4	0	1	0	0	0	0	0	0	0	4	9	68	0	0	0	0	0	0	0	0	0	0	0	1	1	0	1	13	1	4	0	0
Petrochromis_sp_kazumbae_AB-2019	0	1	40	4	14	0	0	1	0	0	0	1	13	74	0	0	11	0	1	1	0	0	0	0	0	0	2	15	89	0	1	2	0	1	0	0	0	0	0	0	0	4	0	1	19	4	4	0	1
Orthochromis_mazimeroensis	0	2	32	3	16	1	1	1	0	0	0	1	8	65	0	0	2	0	0	0	0	0	0	0	0	0	2	4	69	0	1	2	0	0	0	0	0	0	0	0	0	3	0	0	7	0	2	0	0
Neolamprologus_sp_brevis_magara_AB-2019	0	3	29	1	10	1	1	1	0	0	0	1	7	54	0	0	3	0	2	0	0	0	0	0	0	0	4	9	63	0	0	1	0	0	0	0	0	0	0	0	0	1	0	1	6	3	2	0	0
Lamprologus_speciosus	0	1	28	2	11	0	1	1	0	0	0	1	9	54	0	0	5	1	1	1	0	0	0	0	0	0	1	9	63	0	0	2	0	0	0	0	0	0	0	0	0	2	0	2	10	3	5	0	0
Neolamprologus_boulengeri	0	2	25	2	16	0	1	1	0	0	0	1	7	55	0	1	4	0	4	1	0	0	0	0	0	0	3	13	68	0	0	0	0	0	0	0	0	0	0	0	0	0	0	0	13	1	0	0	0
Cyphotilapia_sp_5-bar_frontosa_AB-2019	0	2	31	1	13	1	1	1	0	0	0	1	14	65	0	0	7	0	1	0	0	0	0	0	0	0	4	12	77	0	0	1	0	2	0	0	0	0	0	0	0	3	0	1	10	0	9	0	0
Neolamprologus_ventralis	0	2	34	5	11	0	1	1	0	0	0	1	8	63	0	0	1	0	1	1	0	0	0	0	0	0	2	5	68	0	1	0	0	1	0	0	0	0	0	0	0	2	0	0	8	0	4	0	0
Xenotilapia_longispinis	0	2	38	2	16	1	1	0	0	0	0	1	11	72	0	1	7	0	1	0	0	1	0	0	0	0	2	12	84	0	0	0	0	0	0	0	0	0	0	0	0	0	0	0	14	5	7	0	0
Cardiopharynx_schoutedeni	0	2	33	1	14	1	1	1	0	0	0	1	7	61	0	0	12	0	2	0	0	0	0	0	0	0	5	19	80	0	0	1	0	0	0	0	0	0	0	0	0	1	0	1	20	4	11	0	0
Callochromis_melanostigma	0	2	35	2	16	0	1	1	0	0	0	1	9	67	0	0	7	0	3	1	0	0	0	0	0	0	3	14	81	0	0	5	0	1	0	0	0	0	0	0	0	6	0	1	13	4	2	0	0
Astatoreochromis_straeleni	0	2	38	1	15	0	1	1	0	0	0	1	7	66	0	1	9	2	1	1	0	0	0	0	0	0	2	16	82	0	0	2	0	0	0	0	0	0	0	0	0	2	0	0	18	1	2	0	0
Lepidiolamprologus_profundicola	0	2	26	3	15	0	0	1	0	0	0	0	9	56	0	0	6	1	2	1	0	0	0	0	0	0	0	10	66	0	0	1	0	1	0	0	0	0	0	1	0	3	0	0	8	1	4	0	0
Lamprologus_ornatipinnis	0	2	27	3	11	0	1	1	0	0	0	1	9	55	0	0	4	2	1	1	0	0	0	0	0	0	0	8	63	0	1	0	0	0	0	0	0	0	0	0	1	2	0	0	10	2	3	0	0
Neolamprologus_pleuromaculatus	0	2	29	3	15	0	1	1	0	0	0	1	9	61	0	1	2	1	0	1	0	0	0	0	0	0	4	9	70	0	0	3	0	0	0	0	0	0	0	0	0	3	0	0	7	3	1	0	0
Xenotilapia_ornatipinnis	0	2	38	2	17	1	1	1	0	0	0	1	11	74	0	0	7	0	0	0	0	0	0	0	0	0	0	7	81	0	1	1	0	1	0	0	0	0	0	0	1	4	0	0	11	1	5	0	0
Callochromis_pleurospilus	0	2	32	4	16	0	1	1	0	0	0	1	7	64	0	0	8	0	4	1	0	0	0	0	0	0	4	17	81	0	0	3	0	2	0	0	0	0	0	0	0	5	0	0	16	0	1	0	0
Neolamprologus_toae	0	1	30	4	10	0	1	0	0	0	0	1	10	57	0	0	7	0	5	1	0	1	0	0	0	0	1	15	72	0	0	3	0	1	0	0	0	0	0	0	0	4	0	0	10	0	3	0	0
Spathodus_marlieri	0	2	32	2	13	1	1	1	0	0	0	1	5	58	0	0	7	0	1	0	0	0	0	0	0	0	4	12	70	0	0	1	0	1	0	0	0	0	0	0	1	3	0	0	9	2	7	0	0
Tanganicodus_irsacae	0	2	37	2	14	1	1	1	0	0	0	1	9	68	0	0	9	0	2	0	0	0	0	0	0	0	4	15	83	0	0	0	0	0	0	0	0	0	0	0	3	3	0	0	14	2	3	0	0
Tropheus_brichardi	0	1	38	2	18	0	1	1	0	0	0	1	9	71	0	0	11	0	1	1	0	0	0	0	0	0	2	15	86	0	1	0	0	0	0	0	0	0	0	0	0	1	0	0	22	3	5	0	0
Astatotilapia_stappersii	0	1	44	3	16	0	1	1	0	0	0	1	11	78	0	0	9	0	7	1	0	0	0	0	0	0	0	17	95	0	1	0	0	0	0	0	0	0	0	0	0	1	0	0	18	2	5	0	0
Ophthalmotilapia_sp_paranasuta_AB-2019	0	1	42	3	16	1	1	1	0	0	0	1	9	75	0	1	7	0	3	0	0	0	0	0	0	0	1	12	87	0	0	0	0	1	0	0	0	0	0	0	0	1	0	0	9	1	1	0	0
Paracyprichromis_brieni	0	1	31	2	11	1	1	1	0	0	0	1	5	54	0	1	2	0	2	0	0	0	0	0	0	0	7	12	66	0	0	1	0	1	0	0	0	0	0	0	1	3	0	0	4	1	5	0	0
Lamprologus_kungweensis	0	2	31	2	14	0	1	0	0	0	0	1	9	60	0	0	4	1	1	1	0	0	0	0	0	0	2	9	69	0	1	2	0	0	0	0	1	0	0	0	0	4	0	0	10	3	2	0	0
Petrochromis_orthognathus	0	2	36	2	19	0	1	1	0	0	0	1	8	70	0	0	13	0	1	0	0	0	0	0	0	0	5	19	89	0	1	1	0	1	0	0	0	0	0	0	0	3	0	0	14	0	5	0	0
Eretmodus_marksmithi	0	2	32	4	12	1	1	1	0	0	0	1	7	61	0	0	6	0	5	0	0	0	0	0	0	0	4	15	76	0	1	2	0	0	0	0	0	0	0	0	0	3	0	0	11	5	6	0	0
Neolamprologus_falcicula	0	2	34	6	11	1	1	0	0	0	0	1	10	66	0	0	2	0	1	0	0	0	0	0	0	0	2	5	71	0	0	0	0	0	0	0	1	0	0	0	1	2	0	0	11	0	6	0	0
Tropheus_sp_brichardi_kipili_AB-2019	0	2	38	1	13	0	1	1	0	0	0	1	5	62	0	0	13	0	1	1	0	0	0	0	0	0	0	15	77	0	0	2	0	0	0	0	0	0	0	0	0	2	0	1	18	1	5	0	0
Ophthalmotilapia_boops	0	2	35	1	17	0	1	1	0	0	0	1	5	63	0	0	4	0	2	1	0	0	0	0	0	0	3	10	73	0	0	2	0	0	0	0	0	0	0	0	1	3	0	0	15	2	6	0	0
Julidochromis_marksmithi	0	1	25	1	13	0	1	1	0	0	0	1	7	50	0	0	5	0	1	1	0	0	0	0	0	0	2	9	59	0	0	1	0	0	0	0	0	0	0	0	1	2	0	2	7	2	2	0	0
Lepidiolamprologus_kamambae	0	2	23	4	12	0	1	1	0	0	0	1	8	52	0	0	3	0	2	1	0	0	0	0	0	0	2	8	60	0	0	0	0	0	0	0	0	0	0	0	1	1	0	1	10	0	5	0	0
Trematocara_zebra	0	1	16	3	7	0	1	1	0	0	0	0	9	38	0	0	5	0	0	1	0	0	0	0	0	0	1	7	45	0	0	0	0	0	0	0	0	0	0	1	0	1	0	1	5	0	0	0	0
Neolamprologus_sp_cygnus_AB-2019	0	2	31	3	10	1	0	0	0	0	0	1	9	57	0	0	0	1	0	0	0	0	0	0	0	0	1	2	59	0	0	2	0	1	0	1	1	0	0	0	0	5	0	1	9	1	5	0	0
Neolamprologus_sp_eseki_AB-2019	0	1	31	0	10	1	1	1	0	0	0	1	7	53	0	0	2	0	3	0	0	0	0	0	0	0	2	7	60	0	0	0	0	1	0	0	0	0	0	0	0	1	0	1	6	1	5	0	0
Cyphotilapia_frontosa	0	1	27	2	10	1	1	0	0	0	0	1	11	54	0	0	4	0	1	0	0	0	0	0	0	0	1	6	60	0	0	5	0	0	0	0	0	0	0	0	0	5	0	3	13	1	4	0	0
Tropheus_polli	0	1	35	3	18	0	1	1	0	0	0	1	7	67	0	0	9	0	1	1	0	0	0	0	0	0	5	16	83	0	1	3	0	0	0	0	0	0	0	0	0	4	0	1	22	2	6	0	0
Benthochromis_sp_horii_mahale_AB-2019	0	3	26	3	13	1	1	1	0	0	0	1	9	58	0	0	3	0	1	0	0	0	0	0	0	0	5	9	67	0	0	0	0	0	0	0	0	0	0	0	0	0	0	0	14	1	0	0	0
Xenotilapia_sp_spilopterus_north_AB-2019	0	1	29	2	18	1	1	0	0	0	0	1	8	61	0	0	4	1	0	0	0	1	0	0	0	0	3	9	70	0	0	3	0	1	0	0	0	0	0	0	0	4	0	1	10	2	2	0	0
Neolamprologus_sp_caudopunctatus_kipili_AB-2019	0	3	24	1	14	1	1	0	0	0	0	1	9	54	0	0	5	0	5	0	0	0	0	0	0	0	2	12	66	0	0	2	0	1	0	0	1	0	0	0	0	4	0	0	12	1	2	0	0
Tropheus_sp_mpimbwe_AB-2019	0	2	37	2	11	0	1	1	0	0	0	1	6	61	0	1	9	0	1	1	0	0	0	0	0	0	1	13	74	0	0	2	0	2	0	0	0	0	0	0	0	4	0	0	22	1	5	0	0
Neolamprologus_sp_furcifer_ulwile_AB-2019	0	1	29	4	9	0	1	1	0	0	0	1	5	51	0	0	4	0	2	1	0	0	0	0	0	0	2	9	60	0	0	4	0	0	0	0	0	0	0	0	1	5	0	0	8	1	3	0	0
Chalinochromis_sp_bifrenatus	0	2	26	3	11	0	1	1	0	0	0	1	6	51	0	0	3	0	0	1	0	0	0	0	0	0	3	7	58	0	0	1	0	2	0	0	0	0	0	0	0	3	0	2	3	0	4	0	0
Petrochromis_sp_kipili_brown_AB-2019	0	1	34	3	13	0	1	1	0	0	0	1	8	62	0	0	7	0	2	1	0	0	0	0	0	0	1	11	73	0	1	3	0	2	0	0	0	0	0	0	1	7	0	1	17	1	0	0	0
Petrochromis_sp_giant_AB-2019	0	2	35	3	15	0	1	1	0	0	0	1	11	69	0	0	11	0	2	0	0	0	0	0	0	0	3	16	85	0	0	2	0	1	0	0	0	0	0	0	1	4	0	0	22	0	2	0	0
Lepidiolamprologus_mimicus	0	2	23	2	11	0	0	1	0	0	0	1	7	47	0	0	1	0	0	1	0	0	0	0	0	0	3	5	52	0	0	2	0	1	0	0	0	0	0	0	1	4	0	0	2	1	8	0	0
Benthochromis_tricoti	0	2	21	1	12	0	1	1	0	0	0	0	6	44	0	0	3	0	1	1	0	0	0	0	0	0	4	9	53	0	0	3	0	2	0	0	0	0	0	1	0	6	0	0	10	2	1	0	0
Petrochromis_macrognathus	0	2	40	2	17	0	1	1	0	0	0	1	6	70	0	0	10	0	1	1	0	0	0	0	0	0	3	15	85	0	0	1	0	0	0	0	0	0	0	0	0	1	0	1	11	1	3	0	0
Petrochromis_sp_moshi_yellow_AB-2019	0	2	38	2	10	0	1	0	0	0	0	1	10	64	0	0	11	0	1	1	0	1	0	0	0	0	0	14	78	0	0	2	0	1	0	0	0	0	0	0	2	5	0	0	14	1	5	0	0
Tropheus_sp_Kirschfleck	0	2	30	3	16	0	1	1	0	0	0	1	11	65	0	0	14	1	0	1	0	0	0	0	0	0	2	18	83	0	0	2	0	0	0	0	0	0	0	0	1	3	0	1	15	0	5	0	0
Petrochromis_sp_red_AB-2019	0	0	35	3	14	0	1	1	0	0	0	1	4	59	0	0	8	0	2	1	0	0	0	0	0	0	2	13	72	0	2	0	0	0	0	0	0	0	0	0	1	3	0	0	24	0	3	0	0
Bathybates_ferox	0	2	28	2	14	1	1	0	0	0	0	1	11	60	0	0	5	0	1	0	0	0	0	0	0	0	2	8	68	0	0	1	0	1	0	0	0	0	0	0	0	2	0	0	16	1	2	0	0
Neolamprologus_sp_gracilis_tanzania_AB-2019	0	2	31	2	10	0	1	1	0	0	0	1	7	55	0	0	1	0	4	1	0	0	0	0	0	0	1	7	62	0	0	2	0	0	0	0	0	0	0	0	0	2	0	1	6	0	6	0	0
Neolamprologus_sp_falcicula_mahale_AB-2019	0	2	27	2	7	0	1	1	0	0	0	1	11	52	0	0	2	0	0	1	0	0	0	0	0	0	1	4	56	0	0	4	1	0	0	0	0	0	0	0	0	5	0	0	9	0	5	0	0
Neolamprologus_leloupi	0	1	28	4	12	1	1	1	0	0	0	1	9	58	0	1	3	1	1	0	0	0	0	0	0	0	4	10	68	0	0	1	0	1	0	0	0	0	0	0	0	2	0	1	13	0	5	0	0
Telmatochromis_dhonti	0	2	34	4	12	0	1	0	0	0	0	1	8	62	0	0	2	0	3	1	0	0	0	0	0	0	1	7	69	0	0	0	0	1	0	0	0	0	0	0	0	1	0	0	10	0	3	0	0
Julidochromis_sp_marlieri_south_AB-2019	0	1	25	2	10	1	1	1	0	0	0	1	7	49	0	1	4	0	1	0	0	0	0	0	0	0	3	9	58	0	0	1	1	2	0	0	0	0	0	0	0	4	0	1	14	0	7	0	0
Oreochromis_malagarasi	0	4	54	4	21	0	0	1	0	0	0	1	11	96	0	0	10	1	3	1	0	0	0	0	0	0	3	18	114	0	0	1	1	2	0	1	0	0	0	0	1	6	0	1	34	1	13	0	0
Haplochromis_paludinosus	0	2	46	1	11	0	1	0	0	0	0	1	8	70	0	0	8	0	0	1	0	1	0	0	0	0	1	11	81	0	0	4	0	1	0	0	0	0	0	0	0	5	0	1	12	1	2	0	0
Orthochromis_uvinzae	0	1	33	3	17	1	1	1	0	0	0	1	8	66	0	1	1	0	0	0	0	0	0	0	0	0	1	3	69	0	0	3	0	2	0	0	0	0	0	0	1	6	0	1	4	1	0	0	0
Orthochromis_malagaraziensis	0	3	35	3	16	1	1	1	0	0	0	1	8	69	0	0	4	0	1	0	0	0	0	0	0	0	1	6	75	0	0	2	0	0	0	0	0	0	0	0	0	2	0	0	5	2	3	0	0
Neolamprologus_niger	0	2	28	3	9	0	1	1	0	0	0	1	8	53	0	1	4	0	0	1	0	0	0	0	0	0	0	6	59	0	0	0	0	0	0	0	0	0	0	0	0	0	0	0	16	0	6	0	0
Telmatochromis_bifrenatus	0	1	26	2	13	0	1	1	0	0	0	1	8	53	0	1	1	0	0	1	0	0	0	0	0	0	1	4	57	0	0	2	0	0	0	0	0	0	0	0	0	2	0	1	9	1	6	0	0
Ectodus_sp_north	0	1	30	6	17	1	1	1	0	0	0	1	9	67	0	1	7	0	3	0	0	0	0	0	0	0	1	12	79	0	0	1	0	0	0	0	0	0	0	0	0	1	0	0	10	0	2	0	0
Trematocara_caparti	0	1	11	0	4	0	1	1	0	0	0	1	5	24	0	0	4	0	0	1	0	0	0	0	0	0	2	7	31	0	0	0	0	1	0	0	0	0	0	0	0	1	0	0	1	2	1	0	0
Telmatochromis_sp_dhonti_twiyu_AB-2019	0	2	35	3	12	1	1	1	0	0	0	1	9	65	0	0	3	0	4	0	0	0	0	0	0	0	3	10	75	0	1	0	0	1	0	0	0	0	0	0	0	2	0	0	3	0	3	0	0
Petrochromis_sp_polyodon_texas_AB-2019	0	3	34	3	15	0	1	1	0	0	0	1	5	63	0	0	13	1	2	1	0	0	0	0	0	0	3	20	83	0	0	5	0	0	0	0	0	0	0	0	1	6	0	0	19	3	1	0	0
Neolamprologus_petricola	0	2	24	4	11	0	1	1	0	0	0	1	9	53	0	0	5	0	3	1	0	0	0	0	0	0	3	12	65	0	0	3	0	0	0	0	0	0	0	0	1	4	0	1	8	0	4	0	0
Ophthalmotilapia_sp_white_cap_AB-2019	0	2	38	1	18	1	1	1	0	0	0	1	11	74	0	0	6	0	1	0	0	0	0	0	0	0	1	8	82	0	0	2	1	1	0	0	0	0	0	0	0	4	0	1	10	1	6	0	0
Chalinochromis_cyanophleps	0	2	30	2	8	0	0	1	0	0	0	1	8	52	0	0	3	0	3	0	0	0	0	0	0	0	6	12	64	0	0	2	0	1	0	1	0	0	0	0	0	4	0	0	4	2	5	1	0
Neolamprologus_timidus	0	2	29	3	11	0	1	1	0	0	0	1	7	55	0	0	1	0	1	1	0	0	0	0	0	0	2	5	60	0	0	2	0	1	0	0	0	0	0	0	0	3	0	1	5	1	6	0	0
Petrochromis_sp_macrognathus_rainbow_AB-2019	0	2	32	2	15	0	1	0	0	0	0	1	6	59	0	0	8	0	3	1	0	0	0	0	0	0	2	14	73	0	1	6	0	3	0	0	1	0	0	0	1	12	0	0	21	1	1	0	0
Astatotilapia_flaviijosephi	0	2	35	3	11	0	1	0	0	0	0	1	9	62	0	0	10	0	2	1	0	0	0	0	0	0	4	17	79	0	0	1	0	1	0	0	0	0	0	0	0	2	0	0	20	3	6	0	0
Neolamprologus_cancellatus	0	2	20	3	10	0	1	1	0	0	0	1	5	43	0	0	4	0	1	1	0	0	0	0	0	0	4	10	53	0	0	0	0	1	0	0	0	0	0	0	0	1	0	0	15	0	1	0	0
Tangachromis_dhanisi	0	0	34	4	17	0	0	0	0	0	0	0	10	65	0	0	4	0	2	0	0	0	0	0	0	1	3	10	75	0	1	0	0	1	0	1	1	0	0	0	1	5	0	0	12	2	6	0	0
Plecodus_elaviae	0	2	31	1	8	1	1	1	0	0	0	1	11	57	0	0	10	1	1	0	0	0	0	0	0	0	2	14	71	0	0	3	0	1	0	0	0	0	0	0	1	5	0	0	14	2	8	0	0
Lepidiolamprologus_sp_meeli_kipili_AB-2019	0	2	27	2	15	0	1	1	0	0	0	1	7	56	0	0	3	1	1	1	0	0	0	0	0	0	3	9	65	0	0	3	0	0	0	0	0	0	0	0	0	3	0	2	10	1	2	0	0
Neolamprologus_bifasciatus	0	1	36	3	11	0	1	0	0	0	0	1	7	60	0	0	2	1	1	1	0	0	0	0	0	0	4	9	69	0	0	1	0	0	0	0	1	0	0	0	0	2	0	0	6	0	5	0	0
Tropheus_sp_murago_AB-2019	0	2	29	1	14	0	1	1	0	0	0	1	6	55	0	1	16	0	4	1	0	0	0	0	0	0	1	23	78	0	0	2	0	0	0	0	0	0	0	0	0	2	0	0	11	1	2	0	0
Xenotilapia_tenuidentata	0	2	34	8	17	1	1	1	0	0	0	1	8	73	0	0	10	0	2	0	0	0	0	0	0	0	1	13	86	0	0	2	0	0	0	0	0	0	0	0	2	4	0	1	13	0	3	0	0
Pyrrhura_lepida	5	0	0	0	0	27	0	0	0	0	0	1	0	33	0	0	0	0	0	7	0	0	0	0	0	0	0	7	40	0	0	0	0	0	0	0	0	0	0	0	0	0	0	0	0	0	0	10	0
Mormyrus_lacerda	0	1	17	5	10	0	3	1	0	0	0	2	9	48	0	0	6	0	1	0	0	0	0	0	0	0	3	10	58	0	0	0	0	0	0	0	0	0	0	0	0	0	0	5	22	4	5	0	0
Brevimyrus_niger	0	2	34	5	9	0	1	1	0	0	0	2	6	60	0	2	11	2	1	0	2	0	0	0	0	0	5	23	83	0	0	0	0	0	0	0	0	0	0	0	0	0	0	5	15	3	9	0	0
Tenualosa_ilisha	0	3	98	10	69	3	1	0	0	0	0	5	11	200	0	0	8	0	9	0	1	0	0	0	0	0	0	18	218	0	0	0	0	0	0	0	0	0	0	0	0	0	0	0	3	0	3	0	0
Laticauda_colubrina	5	1	0	0	0	110	1	0	0	0	0	1	0	118	2	0	0	0	0	36	0	0	0	0	0	0	0	38	156	0	0	0	0	0	4	0	0	0	0	0	0	4	0	0	0	0	0	16	0
Rousettus_leschenaultii	108	0	0	0	0	561	0	0	0	0	0	0	0	669	6	1	0	0	0	67	0	0	0	0	0	0	0	74	743	3	0	0	0	0	34	0	0	0	0	0	0	37	3	0	0	0	0	29	0
Sarotherodon_lohbergeri	0	5	61	5	25	1	1	0	0	0	0	1	16	115	0	0	9	1	3	0	0	1	0	0	0	0	6	20	135	0	0	4	0	1	0	0	0	0	0	0	2	7	0	1	44	7	15	0	0
Stomatepia_pindu	0	3	50	5	27	1	1	0	0	0	0	1	17	105	0	0	11	0	1	0	0	0	0	0	0	0	3	15	120	0	0	3	0	0	0	0	1	0	0	0	3	7	0	1	28	4	12	0	0
Sarotherodon_caroli	0	1	61	6	24	1	1	0	0	0	0	1	9	104	0	1	9	2	1	0	0	1	0	0	0	0	4	18	122	0	1	6	0	1	0	0	0	0	0	0	3	11	0	0	31	0	14	0	0
Pungu_maclareni	0	5	49	3	23	1	1	1	0	0	0	0	16	99	0	0	17	2	9	0	0	0	0	0	0	0	3	31	130	0	0	6	0	2	0	0	0	0	0	0	1	9	0	0	38	3	7	0	0
Sarotherodon_steinbachi	0	4	59	4	25	1	1	0	0	0	0	0	14	108	0	0	8	0	4	0	0	1	0	0	0	0	7	20	128	0	0	2	0	1	0	0	0	0	0	0	0	3	0	0	35	8	10	0	0
Potos_flavus	120	2	0	0	0	460	0	0	0	0	0	0	0	582	7	0	0	0	0	40	0	0	0	0	0	0	0	47	629	10	0	0	0	0	34	0	0	0	0	0	0	44	7	0	0	0	0	48	0
Procyon_lotor	98	0	0	0	0	328	0	0	0	0	0	0	0	426	2	2	0	0	0	19	0	0	0	0	0	0	0	23	449	8	0	0	0	0	38	0	0	0	0	0	0	46	10	0	0	0	0	64	0
Argyrosomus_japonicus	0	3	178	4	163	1	1	1	0	0	0	1	14	366	0	0	21	0	32	2	0	0	0	0	0	0	2	57	423	0	0	0	0	0	0	0	0	0	0	0	0	0	0	0	2	0	3	0	0
Cyprinodon_tularosa	0	4	70	4	25	1	1	1	0	0	0	1	8	115	0	0	6	0	2	0	0	0	0	0	0	0	1	9	124	0	0	0	0	0	0	0	0	0	0	0	0	0	0	0	0	0	0	0	0
Hippotragus_equinus	114	2	0	0	0	670	1	0	0	0	0	0	0	787	16	0	0	0	0	105	0	0	0	0	0	0	0	121	908	0	0	0	0	0	20	0	0	0	0	0	0	20	2	0	0	0	0	72	0
Pyrrhura_cruentata	5	0	0	0	0	31	0	0	0	0	0	1	0	37	0	0	0	0	0	4	0	0	0	0	0	0	0	4	41	0	0	0	0	0	1	0	0	0	0	0	0	1	0	0	0	0	0	13	0
Crotalus_tigris	24	1	0	0	0	412	1	0	0	0	0	1	0	439	3	1	0	0	0	70	0	0	0	0	0	0	0	74	513	0	0	0	0	0	0	0	0	0	0	0	0	0	0	0	0	0	0	2	0
Phylloscopus_trochilus_trochilus	3	0	0	0	0	280	0	0	0	0	0	1	0	284	0	0	0	0	0	102	0	0	0	0	0	0	0	102	386	0	0	0	0	0	15	0	0	0	0	0	0	15	3	0	0	0	0	306	0
Arothron_firmamentum	0	1	19	1	9	0	1	0	0	0	0	1	2	34	0	0	3	1	1	0	0	0	0	0	0	0	1	6	40	0	0	0	0	0	0	0	0	0	0	0	0	0	0	0	6	0	7	0	0
Platyplectrum_ornatum	9	6	4	8	0	272	1	0	0	0	0	3	0	303	0	1	0	0	1	49	0	0	0	0	0	0	0	51	354	5	0	10	0	14	324	0	0	0	0	0	0	353	5	2	2	0	0	53	0
Callionymus_lyra	0	1	15	1	15	0	0	0	0	0	0	1	2	35	0	0	2	0	1	0	0	0	0	0	0	0	0	3	38	0	0	0	0	0	0	0	0	0	0	0	0	0	0	0	0	0	0	0	0
Pavo_muticus	9	0	0	0	0	26	0	0	0	0	0	1	0	36	0	0	0	0	0	16	0	0	0	0	0	0	0	16	52	0	0	0	0	0	4	0	0	0	0	0	0	4	0	0	0	0	0	10	0
Antechinus_stuartii	195	3	0	0	0	901	0	0	0	0	0	2	0	1101	4	2	0	0	0	58	0	0	0	0	0	0	0	64	1165	2	1	0	0	0	16	0	0	0	0	0	0	19	9	0	0	0	0	109	0
Saimiri_boliviensis_boliviensis	71	1	0	0	0	210	0	0	0	0	0	1	0	283	6	0	0	0	0	33	1	0	0	0	0	0	0	40	323	0	0	0	0	0	0	0	0	0	0	0	0	0	0	0	0	0	0	0	0
Pimephales_promelas	0	6	43	9	17	1	2	0	0	0	0	2	15	95	0	0	1	0	2	0	0	1	0	0	0	0	4	8	103	0	0	0	0	0	0	0	0	0	0	0	0	0	0	0	1	0	0	0	0
Psettodes_erumei	0	1	48	2	30	1	1	1	0	0	0	1	20	105	0	0	9	0	3	0	0	0	0	0	0	0	0	12	117	0	0	0	0	0	0	0	0	0	0	0	0	0	0	0	0	0	0	0	0
Pseudorhombus_dupliciocellatus	0	1	37	4	20	0	1	1	0	0	0	1	7	72	0	0	3	0	5	0	0	0	0	0	0	0	2	10	82	0	0	0	0	1	0	0	0	0	0	0	0	1	0	0	0	0	6	0	0
Paraplagusia_blochii	0	1	60	5	31	0	1	1	0	0	0	1	12	112	0	0	9	0	7	0	0	0	0	0	0	0	0	16	128	0	0	1	0	0	0	0	0	0	0	0	0	1	0	0	10	0	8	0	0
Brachirus_orientalis	0	1	65	7	50	0	1	1	0	0	0	1	11	137	0	0	9	1	10	0	0	0	0	0	0	0	0	20	157	0	0	1	0	4	0	0	0	0	0	0	1	6	0	0	25	1	9	0	0
Colistium_nudipinnis	0	2	34	3	14	0	1	0	0	0	0	1	4	59	0	0	3	0	2	0	0	0	0	0	0	0	0	5	64	0	0	0	0	0	0	0	0	0	0	0	0	0	0	0	15	0	0	0	0
Chascanopsetta_lugubris	0	1	33	3	12	0	0	0	0	0	0	1	3	53	0	0	9	0	7	0	0	0	0	0	0	0	0	16	69	0	0	4	0	0	0	1	0	0	0	0	2	7	0	1	23	0	11	0	0
Trinectes_maculatus	0	1	54	5	28	0	1	2	0	0	0	1	13	105	0	0	13	1	5	0	0	0	0	0	0	0	1	20	125	0	0	0	0	2	0	0	0	0	0	0	0	2	0	0	18	0	6	0	0
Esox_niger	0	1	81	11	16	3	1	5	0	0	0	2	23	143	0	0	7	0	2	2	0	0	0	0	0	0	4	15	158	0	0	1	0	0	0	0	0	0	0	0	0	1	0	0	25	3	0	3	0
Novumbra_hubbsi	0	1	63	11	12	2	1	4	0	0	0	2	25	121	0	0	3	1	4	5	0	2	0	0	0	0	3	18	139	0	0	0	0	0	0	0	0	0	0	0	0	0	0	0	31	0	5	1	0
Umbra_pygmaea	0	2	64	11	16	6	2	2	0	0	0	1	45	149	0	0	4	3	0	18	0	2	0	0	0	1	11	39	188	0	0	0	0	0	0	0	0	0	0	0	0	0	0	0	8	4	0	0	0
Esox_masquinongy	0	1	63	10	12	3	1	5	0	0	0	2	27	124	0	0	7	2	4	2	0	0	0	0	0	0	4	19	143	0	0	1	0	0	0	0	0	0	0	0	1	2	0	0	5	4	7	8	0
Dallia_pectoralis	0	0	73	8	15	11	1	4	0	0	0	2	27	141	0	0	12	0	1	18	0	0	0	0	0	0	2	33	174	0	0	0	0	0	0	0	0	0	0	0	1	1	0	0	26	8	3	14	0
Hystrix_brachyura	98	2	0	0	0	634	0	0	0	0	0	1	0	735	10	0	0	0	0	164	1	0	0	0	0	0	0	175	910	3	0	0	0	0	66	0	0	0	0	0	0	69	18	0	0	0	0	245	0
Manis_crassicaudata	89	0	0	0	0	348	0	0	0	0	0	1	0	438	12	0	0	0	0	97	0	0	0	0	0	0	0	109	547	18	0	0	0	0	254	0	0	0	0	0	0	272	53	1	0	0	0	502	0
Caracal_caracal	116	0	0	0	0	519	1	0	0	0	0	0	0	636	11	0	0	0	0	50	0	0	0	0	0	0	0	61	697	6	0	0	0	0	59	0	0	0	0	0	0	65	7	0	0	0	0	36	0
Ophiodon_elongatus	0	3	115	6	29	0	1	1	0	0	0	1	15	171	0	0	7	1	6	2	0	0	0	0	0	0	3	19	190	0	0	0	0	0	0	0	0	0	0	0	0	0	0	0	0	0	0	0	0
Pogoniulus_pusillus_pusillus	0	0	0	0	0	18	0	0	0	0	0	1	0	19	0	0	0	0	0	2	0	0	0	0	0	0	0	2	21	0	0	0	0	0	54	0	0	0	0	0	0	54	0	0	0	0	0	34	0
Oryzias_woworae	0	2	33	4	19	0	1	1	0	0	0	1	9	70	0	1	5	0	1	1	0	0	0	0	0	0	1	9	79	0	0	0	0	0	0	0	0	0	0	0	0	0	0	0	1	0	1	0	0
Atractosteus_spatula	7	25	83	6	25	51	1	1	0	0	0	2	31	232	0	0	4	2	0	3	0	0	0	0	0	1	27	37	269	0	2	5	0	2	0	1	1	0	0	0	2	13	0	5	22	3	3	10	0
Paedocypris_sp_Pulau_Singkep	0	1	17	4	15	0	0	1	0	0	0	2	7	47	0	0	1	0	0	0	1	0	0	0	0	0	3	5	52	0	0	0	0	0	0	0	0	0	0	0	0	0	0	0	0	0	1	0	0
Accipiter_gentilis_atricapillus	13	0	0	0	0	57	0	0	0	0	0	1	0	71	1	0	0	0	0	10	0	0	0	0	0	0	0	11	82	0	0	0	0	0	1	0	0	0	0	0	0	1	0	0	0	0	0	24	0
Butorides_virescens	9	0	0	0	0	378	0	0	0	0	0	1	0	388	0	0	0	0	0	100	0	0	0	0	0	0	0	100	488	0	0	0	0	0	0	0	0	0	0	0	0	0	0	0	0	0	0	140	0
Proteles_cristata_cristata	148	1	0	0	0	687	1	0	0	0	0	0	0	837	17	1	0	0	0	49	0	0	0	0	0	0	0	67	904	0	0	0	0	0	0	0	0	0	0	0	0	0	0	0	0	0	0	1	0
Ursus_maritimus	169	2	0	0	0	908	1	0	0	0	0	0	0	1080	11	0	0	0	0	96	0	0	0	0	0	0	0	107	1187	2	0	0	0	0	16	0	0	0	0	0	0	18	2	0	0	0	0	17	0
Platanista_gangetica	2	0	0	0	0	17	0	0	0	0	0	0	0	19	0	0	0	0	0	22	0	0	0	0	0	0	0	22	41	0	0	0	0	0	0	0	0	0	0	0	0	0	4	0	0	0	0	39	0
Otocyon_megalotis_megalotis	156	2	0	0	0	576	1	0	0	0	0	0	0	735	4	0	0	0	0	58	0	0	0	0	0	0	0	62	797	0	0	0	0	0	0	0	0	0	0	0	0	0	2	0	0	0	0	7	0
Bubo_scandiacus	10	0	0	0	0	73	0	0	0	0	0	1	0	84	2	0	0	0	0	17	0	0	0	0	0	0	0	19	103	0	0	0	0	0	5	0	0	0	0	0	0	5	0	0	0	0	0	41	0
Phylloscopus_whistleri	8	0	0	0	0	408	0	0	0	0	0	1	0	417	0	0	0	0	0	66	0	0	0	0	0	0	0	66	483	0	0	0	0	0	0	0	0	0	0	0	0	0	0	0	0	0	0	6	0
Onychostruthus_taczanowskii	3	0	0	0	0	21	0	0	0	0	0	1	0	25	0	0	0	0	0	8	0	0	0	0	0	0	0	8	33	0	0	0	0	0	2	0	0	0	0	0	0	2	0	0	0	0	0	12	0
Montifringilla_adamsi	3	0	0	0	0	14	0	0	0	0	0	1	0	18	1	0	0	0	0	6	0	0	0	0	0	0	0	7	25	0	0	0	0	0	2	0	0	0	0	0	0	2	0	0	0	0	0	12	0
Pyrgilauda_ruficollis	3	0	0	0	0	14	0	0	0	0	0	1	0	18	1	0	0	0	0	4	0	0	0	0	0	0	0	5	23	0	0	0	0	0	3	0	0	0	0	0	0	3	0	0	0	0	0	14	0
Ochotona_curzoniae	79	1	0	0	0	670	1	0	0	0	0	0	0	751	4	1	0	0	0	63	0	0	0	0	0	0	0	68	819	0	0	0	0	0	0	0	0	0	0	0	0	0	1	0	0	0	0	0	0
Zosterops_japonicus	4	0	0	0	0	95	0	0	0	0	0	1	0	100	0	0	0	0	0	36	0	0	0	0	0	0	0	36	136	0	0	0	0	0	10	0	0	0	0	0	0	10	0	0	0	0	0	82	0
Corvus_kubaryi	7	0	0	0	0	21	0	0	0	0	0	1	0	29	0	0	0	0	0	4	0	0	0	0	0	0	0	4	33	0	0	0	0	0	0	0	0	0	0	0	0	0	0	0	0	0	0	0	0
Mesocricetus_auratus	104	1	0	0	0	865	1	0	0	0	0	0	0	971	4	1	0	0	0	88	0	0	0	0	0	0	0	93	1064	0	0	0	0	0	0	0	0	0	0	0	0	0	0	0	0	0	0	1	0
Myanophis_thanlyinensis	13	0	0	0	0	342	1	0	0	0	0	1	0	357	2	0	0	0	0	54	0	0	0	0	0	0	0	56	413	0	0	0	0	0	1	0	0	0	0	0	0	1	3	2	0	0	0	118	0
Limnothrissa_miodon	0	4	19	4	13	5	1	0	0	0	0	4	1	51	0	0	3	0	1	0	0	0	0	0	0	0	0	4	55	0	0	0	0	0	0	0	0	0	0	0	0	0	0	0	0	0	1	0	0
Sinocyclocheilus_maitianheensis	0	9	46	5	22	1	2	1	0	0	0	4	15	105	0	0	0	2	3	0	2	0	0	0	0	0	8	15	120	0	0	2	2	0	0	0	0	0	0	0	2	6	0	0	2	4	1	0	0
Sinocyclocheilus_anophthalmus	0	7	35	8	23	1	3	1	0	0	0	4	15	97	0	1	4	0	5	0	3	0	0	0	0	0	12	25	122	0	0	0	0	0	0	0	0	0	0	0	0	0	0	0	0	0	0	0	1
Microtus_oregoni	105	1	0	0	0	1066	0	0	0	0	0	0	0	1172	8	2	0	0	0	121	0	0	0	0	0	0	0	131	1303	0	0	0	0	0	0	0	0	0	0	0	0	0	0	0	0	0	0	0	0
Giraffa_camelopardalis_antiquorum	97	1	0	0	0	488	1	0	0	0	0	0	0	587	9	1	0	0	0	85	0	0	0	0	0	0	0	95	682	0	0	0	0	0	10	0	0	0	0	0	0	10	9	0	0	0	0	50	0
Bothrops_jararaca	23	1	0	0	0	536	1	0	0	0	0	2	0	563	2	0	0	0	0	62	0	0	0	0	0	0	0	64	627	0	0	0	0	0	0	0	0	0	0	0	0	0	0	0	0	0	0	12	0
Hypomesus_nipponensis	0	0	0	2	7	0	1	0	0	0	0	0	0	10	0	0	1	0	1	1	0	1	0	0	0	0	0	4	14	0	0	0	0	0	0	0	0	0	0	0	0	0	0	0	1	0	1	0	0
Haplochromis_burtoni	0	3	64	1	29	1	1	1	0	0	0	1	14	115	0	0	6	1	0	0	0	0	0	0	0	0	3	10	125	0	0	7	2	1	0	0	0	0	0	0	1	11	0	0	12	1	3	0	0
Cyprinodon_brontotheroides	0	4	61	4	24	1	1	1	0	0	0	1	7	104	0	0	3	0	2	0	0	0	0	0	0	0	1	6	110	0	0	1	0	0	0	0	0	0	0	0	0	1	0	0	8	0	0	0	0
Hirundichthys_speculiger	0	4	54	7	38	0	0	1	0	0	0	1	5	110	0	0	6	0	8	1	1	0	0	0	0	0	1	17	127	0	0	0	0	0	0	0	0	0	0	0	0	0	0	0	0	0	0	0	0
Tremarctos_ornatus	96	2	0	0	0	397	1	0	0	0	0	0	0	496	4	0	0	0	0	61	0	0	0	0	0	0	0	65	561	32	0	0	0	0	119	0	0	0	0	0	0	151	18	0	0	0	0	262	0
Glandirana_rugosa	68	14	47	19	22	851	1	0	0	0	0	3	0	1025	6	1	5	2	0	128	0	0	0	0	0	0	0	142	1167	9	0	2	0	3	25	0	0	0	0	0	0	39	23	0	4	3	3	78	0
Gorsachius_goisagi	9	0	0	0	0	49	0	0	0	0	0	1	0	59	1	0	0	0	0	28	0	0	0	0	0	0	0	29	88	1	0	0	0	0	70	0	0	0	0	0	0	71	0	0	0	0	0	209	0
Prionailurus_iriomotensis	110	0	0	0	0	536	1	0	0	0	0	0	0	647	10	1	0	0	0	55	0	0	0	0	0	0	0	66	713	7	0	0	0	0	31	0	0	0	0	0	0	38	24	0	0	0	0	149	0
Haplochromis_chilotes	0	1	53	0	14	0	1	1	0	0	0	1	13	84	0	0	2	0	0	1	0	0	0	0	0	0	2	5	89	0	1	15	4	10	0	0	0	0	0	0	1	31	0	1	18	1	4	0	0
Haplochromis_sauvagei	0	3	69	5	24	0	1	1	0	0	0	1	17	121	0	0	4	0	0	1	0	0	0	0	0	0	3	8	129	0	0	11	0	4	0	0	0	0	0	0	3	18	0	0	19	2	2	0	0
Lithochromis_rufus	0	1	48	3	16	0	1	1	0	0	0	1	12	83	0	0	5	0	1	1	0	0	0	0	0	0	1	8	91	0	1	21	1	3	0	0	0	0	0	0	3	29	0	0	16	2	8	0	0
Crotalus_adamanteus	27	0	0	0	0	386	1	0	0	0	0	1	0	415	2	2	0	0	0	50	0	0	0	0	0	0	0	54	469	0	0	0	0	0	0	0	0	0	0	0	0	0	0	0	0	0	0	4	0
Tyto_alba	13	0	0	0	0	197	0	0	0	0	0	1	0	211	1	0	0	0	0	68	0	0	0	0	0	0	0	69	280	0	0	0	0	0	0	0	0	0	0	0	0	0	0	0	0	0	0	1	0
Chelydra_serpentina	261	1	0	0	0	505	2	0	0	0	0	1	0	770	31	0	0	0	0	68	0	0	0	0	0	0	0	99	869	36	1	0	0	0	9	0	0	0	0	0	0	46	25	0	0	0	0	15	0
Amblyornis_subalaris	4	0	0	0	0	16	0	0	0	0	0	1	0	21	2	0	0	0	0	6	0	0	0	0	0	0	0	8	29	0	0	0	0	0	4	0	0	0	0	0	0	4	0	0	0	0	0	9	0
Motacilla_tschutschensis	3	0	0	0	0	12	0	0	0	0	0	1	0	16	0	0	0	0	0	3	0	0	0	0	0	0	0	3	19	0	0	0	0	0	1	0	0	0	0	0	0	1	0	0	0	0	0	6	0
Lethenteron_camtschaticum	0	0	0	0	0	0	0	0	0	2	3	0	0	5	0	0	0	0	4	0	0	1	0	5	22	0	0	32	37	0	0	0	0	0	0	0	0	1	2	0	0	3	0	0	0	0	0	0	0
Callorhinchus_milii	0	0	0	0	1	0	1	0	0	3	0	3	0	8	0	0	1	0	0	0	0	0	0	3	1	0	0	5	13	0	0	0	0	0	0	0	0	0	0	0	0	0	0	0	0	0	0	0	0
Larimichthys_polyactis	0	2	109	3	76	0	1	1	0	0	0	1	7	200	0	1	24	0	10	0	0	0	0	0	0	0	2	37	237	0	0	0	0	0	0	0	0	0	0	0	0	0	0	0	1	0	1	0	0
Rhinoceros_unicornis	133	2	0	0	0	801	1	0	0	0	0	0	0	937	18	1	0	0	0	129	0	0	0	0	0	0	0	148	1085	7	0	0	0	0	42	0	0	0	0	0	0	49	12	0	0	0	0	134	0
Dipodomys_spectabilis	81	1	0	0	0	779	0	0	0	0	0	1	0	862	5	0	0	0	0	68	0	0	0	0	0	0	0	73	935	0	0	0	0	0	0	0	0	0	0	0	0	0	0	0	0	0	0	0	0
Caranx_melampygus	0	10	117	6	102	1	1	1	0	0	0	0	7	245	0	0	36	0	9	0	0	0	0	0	0	0	4	49	294	0	0	0	0	0	0	0	0	0	0	0	0	0	0	0	3	0	2	0	0
Morone_chrysops	0	4	52	5	18	1	1	1	0	0	0	1	6	89	0	0	4	1	4	0	0	0	0	0	0	0	2	11	100	0	1	17	0	7	0	0	0	0	0	0	3	28	0	2	36	4	17	0	0
Mustela_nivalis	124	1	0	0	0	662	1	0	0	0	0	0	0	788	11	1	0	0	0	68	0	0	0	0	0	0	0	80	868	8	0	0	0	0	20	0	0	0	0	0	0	28	31	0	0	0	0	91	0
Cephalopholis_sonnerati	0	7	97	6	47	4	1	0	0	0	0	1	40	203	0	0	15	0	8	0	0	0	0	0	0	0	3	26	229	0	0	0	0	0	0	0	0	0	0	0	0	0	0	0	0	0	0	0	0
Phyllostomus_hastatus	106	0	0	0	0	403	1	0	0	0	0	0	0	510	9	1	0	0	0	53	0	0	0	0	0	0	0	63	573	0	0	0	0	0	1	0	0	0	0	0	0	1	0	0	0	0	0	0	0
Microtus_richardsoni	76	1	0	0	0	681	1	0	0	0	0	0	0	759	3	1	0	0	0	109	0	0	0	0	0	0	0	113	872	1	0	0	0	0	3	0	0	0	0	0	0	4	93	0	0	0	0	508	0
Cirrhinus_cirrhosus	0	11	50	10	32	1	1	1	0	0	0	2	32	140	0	0	18	6	4	0	1	0	0	0	0	0	10	39	179	0	0	0	0	0	0	0	0	0	0	0	0	0	0	2	88	29	49	0	0
Cygnus_buccinator	12	0	0	0	0	84	0	0	0	0	0	1	0	97	1	0	0	0	0	8	0	0	0	0	0	0	0	9	106	0	0	0	0	0	0	0	0	0	0	0	0	0	1	0	0	0	0	9	0
Centrocercus_urophasianus	7	0	0	0	0	15	0	0	0	0	0	1	0	23	0	0	0	0	0	3	0	0	0	0	0	0	0	3	26	0	0	0	0	0	0	0	0	0	0	0	0	0	0	0	0	0	0	0	0
Lagopus_leucura	6	0	0	0	0	21	0	0	0	0	0	1	0	28	0	0	0	0	0	3	0	0	0	0	0	0	0	3	31	0	0	0	0	0	0	0	0	0	0	0	0	0	4	0	0	0	0	19	0
Alectoris_rufa	7	0	0	0	0	20	0	0	0	0	0	1	0	28	1	0	0	0	0	3	0	0	0	0	0	0	0	4	32	0	0	0	0	0	1	0	0	0	0	0	0	1	0	0	0	0	0	2	0
Panthera_tigris_jacksoni	116	0	0	0	0	597	1	0	0	0	0	0	0	714	13	1	0	0	0	49	0	0	0	0	0	0	0	63	777	1	0	0	0	0	11	0	0	0	0	0	0	12	12	0	0	0	0	67	0
Galemys_pyrenaicus	78	0	0	0	0	515	1	0	0	0	0	1	0	595	3	1	0	0	0	64	0	0	0	0	0	0	0	68	663	1	0	0	0	0	38	0	0	0	0	0	0	39	1	0	0	0	0	57	0
Chrysopelea_ornata	16	0	0	0	0	268	1	0	0	0	0	1	0	286	4	2	0	0	0	88	0	0	0	0	0	0	0	94	380	0	0	0	0	0	6	0	0	0	0	0	0	6	4	4	0	0	0	169	0
Addax_nasomaculatus	94	1	0	0	0	601	0	0	0	0	0	0	0	696	18	1	0	0	0	124	0	0	0	0	0	0	0	143	839	21	0	0	0	0	124	0	0	0	0	0	0	145	12	0	0	0	0	140	0
Crossoptilon_mantchuricum	7	0	0	0	0	43	0	0	0	0	0	1	0	51	1	0	0	0	0	4	0	0	0	0	0	0	0	5	56	0	0	0	0	0	6	0	0	0	0	0	0	6	2	0	0	0	0	17	0
Periophthalmus_modestus	0	1	85	12	33	0	1	0	0	0	0	1	9	142	0	0	21	0	25	0	0	1	0	0	0	0	6	53	195	0	0	0	0	0	0	0	0	0	0	0	0	0	0	0	1	0	0	0	0
Pipa_parva	9	7	25	8	10	367	1	0	0	0	0	3	0	430	2	0	2	0	0	78	0	0	0	0	0	0	0	82	512	0	0	0	1	0	11	0	0	0	0	0	0	12	2	1	19	5	2	105	0
Pituophis_catenifer_pumilus	17	0	0	0	0	267	1	0	0	0	0	1	0	286	1	0	0	0	0	46	0	0	0	0	0	0	0	47	333	3	1	0	0	0	78	0	0	0	0	0	0	82	0	0	0	0	0	79	0
Labeo_calbasu	0	10	52	16	28	1	2	1	0	0	0	2	32	144	0	0	5	3	4	0	0	0	0	0	0	0	12	24	168	0	0	1	1	1	0	0	0	0	0	0	2	5	0	6	74	17	46	0	0
Stomatorhinus_ivindoensis	0	1	4	3	2	0	2	0	0	0	0	1	3	16	0	0	2	0	2	0	1	0	0	0	0	0	1	6	22	0	0	7	0	0	0	0	0	0	0	0	0	7	0	4	37	3	18	4	0
Pollimyrus_plagiostoma	0	1	4	0	3	0	2	1	0	0	0	2	2	15	0	0	2	1	0	0	1	0	0	0	0	0	2	6	21	0	1	10	0	0	0	0	0	0	0	0	1	12	0	4	39	10	14	2	0
Pollimyrus_isidori	0	1	5	1	1	0	0	1	0	0	0	2	4	15	0	0	2	0	0	0	1	0	0	0	0	0	1	4	19	0	1	5	0	0	0	0	0	0	0	0	1	7	0	7	35	12	7	0	2
Synchiropus_splendidus	0	0	16	1	9	0	0	0	0	0	0	1	1	28	0	1	1	0	1	0	0	0	0	0	0	0	0	3	31	0	0	0	0	0	0	0	0	0	0	0	0	0	0	0	0	0	3	0	0
Albula_glossodonta	0	4	85	3	46	2	2	1	0	0	0	2	8	153	0	0	3	0	2	1	1	0	0	0	0	0	3	10	163	0	0	0	0	0	0	0	0	0	0	0	0	0	0	0	0	0	0	0	0
Corydoras_maculifer	0	4	38	3	13	0	2	1	0	0	0	2	6	69	0	0	2	0	0	0	0	0	0	0	0	0	1	3	72	0	2	0	0	0	0	0	0	0	0	0	0	2	0	0	1	0	0	0	0
Corydoras_sp_C115	0	4	45	4	11	0	2	1	0	0	0	2	6	75	0	0	0	0	1	0	0	0	0	0	0	0	1	2	77	0	0	0	0	0	0	0	0	0	0	0	0	0	0	0	0	0	0	0	0
Praomys_delectorum	116	1	0	0	0	846	1	0	0	0	0	0	0	964	6	1	0	0	0	93	0	0	0	0	0	0	0	100	1064	2	0	0	0	0	8	0	0	0	0	0	0	10	12	0	0	0	0	89	0
Grammomys_dolichurus	96	1	0	0	0	685	1	0	0	0	0	0	0	783	17	2	0	0	0	120	0	0	0	0	0	0	0	139	922	2	0	0	0	0	5	0	0	0	0	0	0	7	26	1	0	0	0	169	0
Hylomyscus_alleni	93	1	0	0	0	666	1	0	0	0	0	0	0	761	10	1	0	0	0	115	0	0	0	0	0	0	0	126	887	1	1	0	0	0	11	0	0	0	0	0	0	13	25	2	0	0	0	172	0
Rhynchomys_soricoides	100	1	0	0	0	718	1	0	0	0	0	0	0	820	15	0	0	0	0	70	0	0	0	0	0	0	0	85	905	1	1	0	0	0	14	0	0	0	0	0	0	16	3	1	0	0	0	123	0
Rhabdomys_dilectus	127	1	0	0	0	881	1	0	0	0	0	0	0	1010	3	1	0	0	0	73	0	0	0	0	0	0	0	77	1087	2	1	0	0	0	22	0	0	0	0	0	0	25	4	0	0	0	0	68	0
Rangifer_tarandus_caribou	120	1	0	0	0	762	1	0	0	0	0	0	0	884	15	0	0	0	0	155	0	0	0	0	0	0	0	170	1054	4	0	0	0	0	47	0	0	0	0	0	0	51	6	0	0	0	0	95	0
Nanger_dama_ruficollis	114	2	0	0	0	652	1	0	0	0	0	0	0	769	15	0	0	0	0	113	0	0	0	0	0	0	0	128	897	2	0	0	0	0	23	0	0	0	0	0	0	25	5	0	0	0	0	93	0
Plecoglossus_altivelis	0	4	51	6	21	1	2	0	0	0	0	2	10	97	0	0	1	0	4	0	0	1	0	0	0	0	2	8	105	0	0	1	1	0	0	0	0	0	0	0	0	2	0	0	1	0	3	0	0
Euthynnus_affinis	0	5	40	4	23	1	1	2	0	0	0	1	11	88	0	0	10	1	4	0	0	0	0	0	0	0	5	20	108	0	0	3	0	1	0	0	0	0	0	0	0	4	0	0	20	0	4	0	0
Lanius_collurio	6	0	0	0	0	90	0	0	0	0	0	2	0	98	0	0	0	0	0	32	0	0	0	0	0	0	0	32	130	1	0	0	0	0	10	0	0	0	0	0	0	11	1	0	0	0	0	258	0
Acipenser_transmontanus	0	0	5	2	1	1	2	0	0	0	0	6	0	17	0	0	3	0	1	2	1	0	0	0	0	0	2	9	26	0	0	0	0	0	0	0	0	0	0	0	0	0	0	0	14	1	1	3	0
Muntiacus_gongshanensis	163	2	0	0	0	942	1	0	0	0	0	0	0	1108	16	0	0	0	0	162	0	0	0	0	0	0	0	178	1286	0	0	0	0	0	0	0	0	0	0	0	0	0	0	0	0	0	0	1	0
Eira_barbara	143	2	0	0	0	674	1	0	0	0	0	0	0	820	3	0	0	0	0	75	0	0	0	0	0	0	0	78	898	6	0	0	0	0	28	0	0	0	0	0	0	34	31	0	0	0	0	108	0
Brachyhypopomus_occidentalis	0	7	48	14	19	2	2	2	0	0	0	2	9	105	0	0	0	2	2	0	0	0	0	0	0	0	11	15	120	0	0	0	0	0	0	0	0	0	0	0	0	0	0	0	0	0	0	0	0
Microtus_richardsoni_arvicoloides	94	1	0	0	0	862	1	0	0	0	0	0	0	958	8	1	0	0	0	104	0	0	0	0	0	0	0	113	1071	1	0	0	0	0	25	0	0	0	0	0	0	26	4	0	0	0	0	82	0
Microtus_montanus	62	1	0	0	0	486	0	0	0	0	0	0	0	549	6	0	0	0	0	60	0	0	0	0	0	0	0	66	615	60	2	0	0	0	419	0	0	0	0	0	0	481	68	1	0	0	0	474	0
Ammodramus_savannarum_pratensis	3	0	0	0	0	18	0	0	0	0	0	1	0	22	0	0	0	0	0	4	0	0	0	0	0	0	0	4	26	0	0	0	0	0	9	0	0	0	0	0	0	9	0	0	0	0	0	20	0
Glaucomys_volans	107	1	0	0	0	820	1	0	0	0	0	1	0	930	8	1	0	0	0	151	0	0	0	0	0	0	0	160	1090	3	0	0	0	0	25	0	0	0	0	0	0	28	23	0	0	0	0	195	0
Calotes_versicolor	0	0	0	0	0	31	0	0	0	0	0	0	0	31	0	0	0	0	0	20	0	0	0	0	0	0	0	20	51	0	0	0	0	0	0	0	0	0	0	0	0	0	7	0	0	0	0	230	3
Sciurus_niger	136	1	0	0	0	1444	0	0	0	0	0	1	0	1582	5	1	0	0	0	418	0	0	0	0	0	0	0	424	2006	0	0	0	0	0	0	0	0	0	0	0	0	0	2	0	0	0	0	64	0
Riparia_riparia	1	0	0	0	0	79	0	0	0	0	0	1	0	81	0	0	0	0	0	12	0	0	0	0	0	0	0	12	93	0	0	0	0	0	6	0	0	0	0	0	0	6	2	0	0	0	0	14	0
Ursus_americanus	190	2	0	0	0	1061	1	0	0	0	0	0	0	1254	10	0	0	0	0	108	0	0	0	0	0	0	0	118	1372	0	0	0	0	0	0	0	0	0	0	0	0	0	1	0	0	0	0	7	0
Elaphurus_davidianus	139	1	0	0	0	867	0	0	0	0	0	0	0	1007	20	1	0	0	0	177	0	0	0	0	0	0	0	198	1205	5	0	0	0	0	48	1	0	0	0	0	0	54	15	0	0	0	0	234	0
Scomber_colias	0	2	85	3	48	1	1	2	0	0	0	1	11	154	0	0	10	0	9	0	0	0	0	0	0	0	3	22	176	0	0	0	0	0	0	0	0	0	0	0	0	0	0	0	0	0	0	0	0
Willisornis_vidua_nigrigula	5	0	0	0	0	51	0	0	0	0	0	1	0	57	1	0	0	0	0	17	0	0	0	0	0	0	0	18	75	0	0	0	0	0	0	0	0	0	0	0	0	0	0	0	0	0	0	76	0
Macaca_arctoides	43	0	0	0	0	295	0	0	0	0	0	1	0	339	9	0	0	0	0	42	0	0	0	0	0	0	0	51	390	0	0	0	0	0	8	0	0	0	0	0	0	8	1	0	0	0	0	4	0
Marmota_monax	140	2	0	0	0	985	1	0	0	0	0	1	0	1129	8	0	0	0	0	164	0	0	0	0	0	0	0	172	1301	0	0	0	0	0	0	0	0	0	0	0	0	0	0	0	0	0	0	7	0
Pteronotus_parnellii_mesoamericanus	94	0	0	0	0	303	1	0	0	0	0	0	0	398	9	1	0	0	0	22	0	0	0	0	0	0	0	32	430	0	0	0	0	0	0	0	0	0	0	0	0	0	0	0	0	0	0	2	0
Mirounga_angustirostris	31	0	0	0	0	219	1	0	0	0	0	0	0	251	8	1	0	0	0	62	0	0	0	0	0	0	0	71	322	1	0	0	0	0	12	0	0	0	0	0	0	13	5	0	0	0	0	362	0
Lophura_nycthemera	6	0	0	0	0	17	0	0	0	0	0	1	0	24	0	0	0	0	0	24	0	0	0	0	0	0	0	24	48	0	0	0	0	0	0	0	0	0	0	0	0	0	0	0	0	0	0	5	0
Tor_tambroides	0	18	63	14	24	1	2	1	0	0	0	3	23	149	0	1	4	0	4	0	2	1	0	0	0	0	15	27	176	0	0	0	0	0	0	0	0	0	0	0	0	0	0	1	1	0	2	0	0
Gyps_himalayensis	13	0	0	0	0	61	0	0	0	0	0	1	0	75	0	0	0	0	0	26	0	0	0	0	0	0	0	26	101	0	0	0	0	0	0	0	0	0	0	0	0	0	0	0	0	0	0	2	0
Caranx_ignobilis	0	4	93	5	91	1	1	1	0	0	0	1	12	209	0	0	12	1	6	0	0	0	0	0	0	0	2	21	230	0	0	0	0	0	0	0	0	0	0	0	0	0	0	0	0	0	0	0	0
Catharus_minimus	2	0	0	0	0	12	0	0	0	0	0	1	0	15	0	0	0	0	0	4	0	0	0	0	0	0	0	4	19	1	0	0	0	0	11	0	0	0	0	0	0	12	0	0	0	0	0	39	0
Catharus_bicknelli	3	0	0	0	0	43	0	0	0	0	0	1	0	47	0	0	0	0	0	15	0	0	0	0	0	0	0	15	62	0	0	0	0	0	36	0	0	0	0	0	0	36	0	0	0	0	0	55	0
Cryptotis_parvus	24	0	0	0	0	121	0	0	0	0	0	0	0	145	19	0	0	0	0	164	0	0	0	0	0	0	0	183	328	0	0	0	0	0	0	0	0	0	0	0	0	0	0	0	0	0	0	7	0
Ovibos_moschatus	120	2	0	0	0	690	1	0	0	0	0	0	0	813	11	0	0	0	0	121	0	0	0	0	0	0	0	132	945	2	0	0	0	0	9	0	0	0	0	0	0	11	2	0	0	0	0	51	0
Hipposideros_pendleburyi	87	0	0	0	0	249	0	0	0	0	0	0	0	336	8	1	0	0	0	25	0	0	0	0	0	0	0	34	370	1	0	0	0	0	6	0	0	0	0	0	0	7	9	0	0	0	0	60	0
Rutilus_rutilus	0	8	73	9	20	2	1	0	0	0	0	2	21	136	0	1	2	0	1	0	1	1	0	0	0	0	13	19	155	0	0	0	0	0	0	0	0	0	0	0	0	0	0	0	0	0	0	0	0
Pavo_cristatus	8	0	0	0	0	182	0	0	0	0	0	1	0	191	3	0	0	0	0	28	0	0	0	0	0	0	0	31	222	0	0	0	0	0	6	0	0	0	0	0	0	6	0	0	0	0	0	7	0
Acrocephalus_arundinaceus	4	0	0	0	0	895	0	0	0	0	0	1	0	900	0	0	0	0	0	11	0	0	0	0	0	0	0	11	911	0	0	0	0	0	9	0	0	0	0	0	0	9	0	0	0	0	0	75	0
Thunnus_orientalis	0	2	69	8	55	2	1	2	0	0	0	1	14	154	0	0	10	1	4	0	0	0	0	0	0	0	4	19	173	0	0	0	0	0	0	0	0	0	0	0	0	0	0	0	0	0	0	0	0
Mastomys_natalensis	70	1	0	0	0	419	0	0	0	0	0	0	0	490	14	0	0	0	0	193	0	0	0	0	0	0	0	207	697	0	0	0	0	0	0	0	0	0	0	0	0	0	0	0	0	0	0	6	0
Lonchura_striata	4	0	0	0	0	67	0	0	0	0	0	1	0	72	0	0	0	0	0	20	0	0	0	0	0	0	0	20	92	0	0	0	0	0	10	0	0	0	0	0	0	10	0	0	0	0	0	63	0
Pipa_carvalhoi	6	4	8	4	2	221	1	0	0	0	0	2	0	248	6	1	11	1	0	86	0	0	0	0	0	0	0	105	353	0	0	0	0	0	0	0	0	0	0	0	0	0	8	0	39	11	1	439	0
Artemisiospiza_belli	3	0	0	0	0	258	0	0	0	0	0	1	0	262	0	0	0	0	0	37	0	0	0	0	0	0	0	37	299	0	0	0	0	0	0	0	0	0	0	0	0	0	0	0	0	0	0	0	0
Lynx_rufus	143	0	0	0	0	680	1	0	0	0	0	0	0	824	10	0	0	0	0	56	0	0	0	0	0	0	0	66	890	0	0	0	0	0	0	0	0	0	0	0	0	0	0	0	0	0	0	0	0
Actinemys_marmorata	406	0	0	0	0	657	1	0	0	0	0	1	0	1065	18	1	0	0	0	144	0	0	0	0	0	0	0	163	1228	0	0	0	0	0	0	0	0	0	0	0	0	0	0	0	0	0	0	0	0
Progne_subis_subis	0	0	0	0	0	745	0	0	0	0	0	1	0	746	0	0	0	0	0	341	0	0	0	0	0	0	0	341	1087	0	0	0	0	0	0	0	0	0	0	0	0	0	0	0	0	0	0	21	0
Moschus_berezovskii	142	1	0	0	0	892	1	0	0	0	0	0	0	1036	12	1	0	0	0	161	0	0	0	0	0	0	0	174	1210	1	0	0	0	0	1	0	0	0	0	0	0	2	1	0	0	0	0	5	0
Tragulus_kanchil	70	0	0	0	0	1042	1	0	0	0	0	0	0	1113	15	1	0	0	0	250	0	0	0	0	0	0	0	266	1379	0	0	0	0	0	3	0	0	0	0	0	0	3	0	0	0	0	0	1	0
Anilios_bituberculatus	3	0	0	0	0	159	1	0	0	0	0	0	0	163	0	0	0	0	0	50	0	0	0	0	0	0	0	50	213	0	0	0	0	0	10	0	0	0	0	0	0	10	0	0	0	0	0	141	0
Tretioscincus_oriximinensis	1	0	0	0	0	143	0	0	0	0	0	0	0	144	0	0	0	0	0	12	1	0	0	0	0	0	0	13	157	3	0	0	0	0	168	0	0	0	0	1	0	172	0	0	0	0	0	5	0
Calyptommatus_sinebrachiatus	1	0	0	0	0	46	0	0	0	0	0	0	0	47	0	0	0	0	0	5	0	0	0	0	0	0	0	5	52	2	0	0	0	0	278	1	0	0	0	1	0	282	0	0	0	0	0	7	0
Noturus_placidus	0	5	19	2	12	0	1	1	0	0	0	2	4	46	0	0	1	1	0	0	0	0	0	0	0	0	8	10	56	0	0	0	2	1	0	0	0	0	0	0	0	3	0	0	4	3	0	0	0
Acrocephalus_familiaris_kingi	3	0	0	0	0	14	0	0	0	0	0	1	0	18	0	0	0	0	0	4	0	0	0	0	0	0	0	4	22	0	0	0	0	0	0	0	0	0	0	0	0	0	0	0	0	0	0	20	0
Rangifer_tarandus	146	1	0	0	0	865	1	0	0	0	0	0	0	1013	14	0	0	0	0	189	0	0	0	0	0	0	0	203	1216	3	0	0	0	0	37	0	0	0	0	0	0	40	13	0	0	0	0	89	0
Myiozetetes_cayanensis	4	0	0	0	0	119	0	0	0	0	0	1	0	124	3	0	0	0	0	36	0	0	0	0	0	0	0	39	163	0	0	0	0	0	1	0	0	0	0	0	0	1	0	0	0	0	0	12	0
Embiotoca_jacksoni	0	2	64	5	13	0	1	1	0	0	0	1	16	103	0	0	4	0	2	0	0	0	0	0	0	0	0	6	109	0	0	0	0	0	0	0	0	0	0	0	0	0	0	0	0	0	0	0	0
Passerculus_sandwichensis_alaudinus	3	0	0	0	0	369	0	0	0	0	0	1	0	373	0	0	0	0	0	51	0	0	0	0	0	0	0	51	424	0	0	0	0	0	0	0	0	0	0	0	0	0	0	0	0	0	0	2	0
Arizona_elegans	19	0	0	0	0	331	1	0	0	0	0	1	0	352	0	1	0	0	0	71	0	0	0	0	0	0	0	72	424	0	0	0	0	0	0	0	0	0	0	0	0	0	0	0	0	0	0	0	0
Laterallus_jamaicensis_coturniculus	11	0	0	0	0	379	0	0	0	0	0	1	0	391	1	0	0	0	0	47	0	0	0	0	0	0	0	48	439	0	0	0	0	0	0	0	0	0	0	0	0	0	0	0	0	0	0	0	0
Rallus_limicola	12	0	0	0	0	767	0	0	0	0	0	1	0	780	0	0	0	0	0	1	0	0	0	0	0	0	0	1	781	0	0	0	0	0	0	0	0	0	0	0	0	0	0	0	0	0	0	0	0
Phrynoglossus_myanhessei	10	5	4	7	3	259	1	0	0	0	0	2	0	291	1	0	1	2	2	68	0	0	0	0	0	0	0	74	365	0	0	0	0	0	0	0	0	0	0	0	0	0	7	1	25	2	1	416	0
Semicossyphus_pulcher	0	4	30	4	11	1	1	0	0	0	0	1	4	56	0	0	5	0	3	0	0	0	0	0	0	0	3	11	67	0	0	0	0	0	0	0	0	0	0	0	0	0	0	0	0	0	0	0	0
Melospiza_melodia	3	0	0	0	0	314	0	0	0	0	0	1	0	318	0	0	0	0	0	72	0	0	0	0	0	0	0	72	390	0	0	0	0	0	0	0	0	0	0	0	0	0	0	0	0	0	0	0	0
Emberiza_elegans	3	0	0	0	0	191	0	0	0	0	0	1	0	195	0	0	0	0	0	34	0	0	0	0	0	0	0	34	229	0	0	0	0	0	0	0	0	0	0	0	0	0	0	0	0	0	0	0	0
Neoarius_graeffei	0	3	23	3	13	0	1	0	0	0	0	2	2	47	0	1	3	0	2	0	0	0	0	0	0	0	2	8	55	0	0	0	0	0	0	0	0	0	0	0	0	0	0	5	15	1	19	0	0
Elgaria_multicarinata_webbii	28	1	0	0	0	434	1	0	0	0	0	1	0	465	0	1	0	0	0	34	0	0	0	0	0	0	0	35	500	0	0	0	0	0	0	0	0	0	0	0	0	0	0	0	0	0	0	0	0
Diadophis_punctatus_similis	16	1	0	0	0	426	1	0	0	0	0	1	0	445	1	0	0	0	0	61	0	0	0	0	0	0	0	62	507	0	0	0	0	0	0	0	0	0	0	0	0	0	0	0	0	0	0	0	0
Clinocottus_analis	0	1	68	4	14	0	1	0	0	0	0	1	8	97	0	0	1	0	3	1	0	0	0	0	0	0	1	6	103	0	0	0	0	0	0	0	0	0	0	0	0	0	0	0	0	0	0	0	0
Agelaius_tricolor	3	0	0	0	0	334	0	0	0	0	0	1	0	338	0	0	0	0	0	64	0	0	0	0	0	0	0	64	402	0	0	0	0	0	0	0	0	0	0	0	0	0	0	0	0	0	0	0	0
Callipepla_californica_brunnescens	17	0	0	0	0	187	0	0	0	0	0	1	0	205	0	0	0	0	0	101	0	0	0	0	0	0	0	101	306	0	0	0	0	0	0	0	0	0	0	0	0	0	0	0	0	0	0	1	0
Clarias_fuscus	0	10	26	6	15	0	2	1	0	0	0	2	3	65	0	1	1	0	3	0	0	0	0	0	0	0	2	7	72	0	1	38	7	15	0	0	0	0	0	0	9	70	0	0	39	2	27	0	0
Ursus_arctos	191	2	0	0	0	1085	1	0	0	0	0	0	0	1279	7	0	0	0	0	112	0	0	0	0	0	0	0	119	1398	0	0	0	0	0	0	0	0	0	0	0	0	0	0	0	0	0	0	5	0
Corvus_cornix	1	0	0	0	0	1	0	0	0	0	0	0	0	2	2	0	0	0	0	10	0	0	0	0	0	0	0	12	14	0	0	0	0	0	0	0	0	0	0	0	0	0	0	0	0	0	0	1	0
Atherinomorus_stipes	0	1	92	4	25	0	1	0	0	0	0	1	3	127	0	0	13	0	5	0	0	0	0	0	0	0	0	18	145	0	0	0	0	0	0	0	0	0	0	0	0	0	0	0	1	0	0	0	0
Typhlomys_cinereus	98	1	0	0	0	849	1	0	0	0	0	0	0	949	11	1	0	0	0	145	0	0	0	0	0	0	0	157	1106	0	0	0	0	0	0	0	0	0	0	0	0	0	0	0	0	0	0	1	0
Spilogale_interrupta	150	2	0	0	0	774	1	0	0	0	0	0	0	927	4	0	0	0	0	91	0	0	0	0	0	0	0	95	1022	0	0	0	0	0	0	0	0	0	0	0	0	0	0	0	0	0	0	1	0
Speothos_venaticus	126	2	0	0	0	474	1	0	0	0	0	0	0	603	5	0	0	0	0	53	0	0	0	0	0	0	0	58	661	8	0	0	0	0	33	0	0	0	0	0	0	41	19	0	0	0	0	91	0
Aspidoscelis_tigris_stejnegeri	8	0	0	0	0	312	1	0	0	0	0	1	0	322	1	1	0	0	0	31	0	0	0	0	0	0	0	33	355	0	0	0	0	0	0	0	0	0	0	0	0	0	0	0	0	0	0	0	0
Puffinus_mauretanicus	9	0	0	0	0	293	0	0	0	0	0	1	0	303	1	0	0	0	0	33	0	0	0	0	0	0	0	34	337	0	0	0	0	0	0	0	0	0	0	0	0	0	0	0	0	0	0	8	0
Sceloporus_occidentalis	24	8	12	10	7	546	2	0	0	0	0	4	0	613	0	1	0	1	1	107	0	0	0	0	0	0	0	110	723	0	0	0	0	0	0	0	0	0	0	0	0	0	0	0	0	0	0	0	0
Balaenoptera_physalus	5	0	0	0	0	67	0	0	0	0	0	0	0	72	2	0	0	0	0	37	0	0	0	0	0	0	0	39	111	0	0	0	0	0	5	0	0	0	0	0	0	5	0	0	0	0	0	2	0
Cebidichthys_violaceus	0	2	80	5	25	5	1	0	0	0	0	1	16	135	0	0	6	1	4	0	0	1	0	0	0	0	0	12	147	0	0	0	0	0	0	0	0	0	0	0	0	0	0	0	0	0	0	0	0
Charina_bottae	23	1	0	0	0	441	1	0	0	0	0	1	0	467	1	1	0	0	0	77	0	0	0	0	0	0	0	79	546	0	0	0	0	0	0	0	0	0	0	0	0	0	0	0	0	0	0	0	0
Nycticorax_nycticorax	6	0	0	0	0	84	0	0	0	0	0	1	0	91	0	0	0	0	0	12	0	0	0	0	0	0	0	12	103	0	0	0	0	0	8	0	0	0	0	0	0	8	3	0	0	0	0	14	0
Bettongia_penicillata_ogilbyi	203	2	0	0	0	1203	0	0	0	0	0	2	0	1410	16	1	0	0	0	124	0	0	0	0	0	0	0	141	1551	0	0	0	0	0	0	0	0	0	0	0	0	0	1	0	0	0	0	5	0
Myrmecobius_fasciatus	124	2	0	0	0	675	0	0	0	0	0	2	0	803	8	2	0	0	0	57	0	0	0	0	0	0	0	67	870	1	0	0	0	0	11	0	0	0	0	0	0	12	4	0	0	0	0	53	0
Piaractus_mesopotamicus	0	13	52	12	29	0	1	2	0	0	0	2	13	124	0	1	3	1	1	0	1	0	0	0	0	0	25	32	156	0	4	38	1	11	0	0	1	0	0	0	20	75	0	26	92	19	52	3	0
Actinemys_pallida	417	1	0	0	0	603	1	0	0	0	0	1	0	1023	14	0	0	0	0	121	0	0	0	0	0	0	0	135	1158	0	0	0	0	0	0	0	0	0	0	0	0	0	0	0	0	0	0	0	0
Phaethornis_superciliosus	1	0	0	0	0	35	0	0	0	0	0	1	0	37	0	0	0	0	0	12	0	0	0	0	0	0	0	12	49	0	0	0	0	0	0	0	0	0	0	0	0	0	0	0	0	0	0	1	0
Empidonax_alnorum	5	0	0	0	0	205	0	0	0	0	0	1	0	211	1	0	0	0	0	33	0	0	0	0	0	0	0	34	245	0	0	0	0	0	20	0	0	0	0	0	0	20	1	0	0	0	0	339	0
Varanus_salvator_macromaculatus	2	0	0	0	0	304	1	0	0	0	0	1	0	308	0	1	0	0	0	31	0	0	0	0	0	0	0	32	340	0	0	0	0	0	7	0	0	0	0	0	0	7	0	0	0	0	0	4	0
Odocoileus_virginianus	115	0	0	0	0	770	0	0	0	0	0	0	0	885	13	2	0	0	0	149	0	0	0	0	0	0	0	164	1049	0	0	0	0	0	0	0	0	0	0	0	0	0	1	0	0	0	0	2	0
Hoolock_leuconedys	38	1	0	0	0	180	0	0	0	0	0	1	0	220	9	0	0	0	0	39	0	0	0	0	0	0	0	48	268	0	0	0	0	0	0	0	0	0	0	0	0	0	0	0	0	0	0	1	0
Symphalangus_syndactylus	37	1	0	0	0	180	0	0	0	0	0	0	0	218	7	0	0	0	0	44	0	0	0	0	0	1	0	52	270	0	0	0	0	0	0	0	0	0	0	0	0	0	0	0	0	0	0	0	0
Trachypithecus_phayrei_crepuscula	32	0	0	0	0	165	1	0	0	0	0	0	0	198	14	0	0	0	0	41	0	0	0	0	0	0	0	55	253	0	0	0	0	0	0	0	0	0	0	0	0	0	0	0	0	0	0	2	0
Pygathrix_nigripes	29	0	0	0	0	175	0	0	0	0	0	0	0	204	11	0	0	0	0	31	0	0	0	0	0	0	0	42	246	0	0	0	0	0	0	0	0	0	0	0	0	0	0	0	0	0	0	1	0
Rhinopithecus_strykeri	36	0	0	0	0	192	0	0	0	0	0	0	0	228	10	0	0	0	0	39	1	0	0	0	0	0	0	50	278	0	0	0	0	0	0	0	0	0	0	0	0	0	0	0	0	0	0	0	0
Pongo_pygmaeus	53	0	0	0	0	232	0	0	0	0	0	0	0	285	10	0	0	0	0	59	0	0	0	0	0	1	0	70	355	0	0	0	0	0	0	0	0	0	0	0	0	0	0	0	0	0	0	3	0
Pithecia_pithecia	70	0	0	0	0	231	0	0	0	0	0	0	0	301	12	0	0	0	0	59	0	0	0	0	0	1	0	72	373	0	0	0	0	0	0	0	0	0	0	0	0	0	0	0	0	0	0	0	0
Papio_hamadryas	11	0	0	0	0	282	1	0	0	0	0	1	0	295	6	0	0	0	0	40	0	0	0	0	0	0	0	46	341	0	0	0	0	0	0	0	0	0	0	0	0	0	0	0	0	0	0	2	0
Nomascus_siki	42	1	0	0	0	183	0	0	0	0	0	1	0	227	9	0	0	0	0	40	0	0	0	0	0	0	0	49	276	0	0	0	0	0	1	0	0	0	0	0	0	1	0	0	0	0	0	1	0
Mandrillus_sphinx	40	0	0	0	0	257	1	0	0	0	0	1	0	299	12	0	0	0	0	48	0	0	0	0	0	0	0	60	359	0	0	0	0	0	0	0	0	0	0	0	0	0	0	0	0	0	0	1	0
Macaca_assamensis	4	0	0	0	0	252	0	0	0	0	0	1	0	257	6	0	0	0	0	52	0	0	0	0	0	0	0	58	315	0	0	0	0	0	0	0	0	0	0	0	0	0	0	0	0	0	0	0	0
Loris_tardigradus	133	0	0	0	0	496	1	0	0	0	0	1	0	631	10	1	0	0	0	58	0	0	0	0	0	0	0	69	700	0	0	0	0	0	0	0	0	0	0	0	0	0	0	0	0	0	0	1	0
Lophocebus_aterrimus	41	0	0	0	0	289	0	0	0	0	0	1	0	331	15	0	0	0	0	48	1	0	0	0	0	0	0	64	395	0	0	0	0	0	0	0	0	0	0	0	0	0	0	0	0	0	0	1	0
Galago_moholi	157	0	0	0	0	520	1	0	0	0	0	1	0	679	12	2	0	0	0	69	0	0	0	0	0	0	0	83	762	0	0	0	0	0	0	0	0	0	0	0	0	0	1	0	0	0	0	4	0
Erythrocebus_patas	36	0	0	0	0	273	0	0	0	0	0	1	0	310	10	0	0	0	0	57	1	0	0	0	0	0	0	68	378	0	0	0	0	0	0	0	0	0	0	0	0	0	0	0	0	0	0	0	0
Daubentonia_madagascariensis	134	1	0	0	0	513	1	0	0	0	0	1	0	650	10	0	0	0	0	91	0	0	0	0	0	0	0	101	751	0	0	0	0	0	0	0	0	0	0	0	0	0	0	0	0	0	0	13	0
Chlorocebus_aethiops	34	0	0	0	0	246	1	0	0	0	0	1	0	282	7	0	0	0	0	45	0	0	0	0	0	0	0	52	334	0	0	0	0	0	0	0	0	0	0	0	0	0	0	0	0	0	0	0	0
Cercopithecus_albogularis	31	0	0	0	0	206	0	0	0	0	0	1	0	238	9	0	0	0	0	44	1	0	0	0	0	0	0	54	292	0	0	0	0	0	0	0	0	0	0	0	0	0	0	0	0	0	0	0	0
Ateles_geoffroyi	72	1	0	0	0	239	0	0	0	0	0	1	0	313	15	0	0	0	0	40	0	0	0	0	0	0	0	55	368	0	0	0	0	0	0	0	0	0	0	0	0	0	0	0	0	0	0	0	0
Cebus_albifrons	74	1	0	0	0	279	0	0	0	0	0	1	0	355	17	0	0	0	0	64	0	0	0	0	0	0	0	81	436	0	0	0	0	0	0	0	0	0	0	0	0	0	0	0	0	0	0	0	0
Macaca_silenus	43	0	0	0	0	314	0	0	0	0	0	1	0	358	9	0	0	0	0	37	0	0	0	0	0	0	0	46	404	0	0	0	0	0	0	0	0	0	0	0	0	0	0	0	0	0	0	0	0
Phrynocephalus_versicolor	2	0	0	0	0	46	1	0	0	0	0	1	0	50	0	0	0	0	0	5	0	0	0	0	0	0	0	5	55	0	0	0	0	0	3	0	0	0	0	0	0	3	0	0	0	0	0	0	0
Pseudis_tocantins	0	0	0	0	0	0	0	0	0	0	0	0	0	0	0	0	0	0	0	0	0	0	0	0	0	0	0	0	0	0	0	0	0	0	2	0	0	0	0	0	0	2	0	0	0	0	0	5	0
Azemiops_feae	27	2	0	0	0	442	1	0	0	0	0	1	0	473	2	0	0	0	0	67	0	0	0	0	0	0	0	69	542	0	0	0	0	0	0	0	0	0	0	0	0	0	0	0	0	0	0	2	0
Gulo_gulo_luscus	101	2	0	0	0	481	1	0	0	0	0	0	0	585	20	0	0	0	0	85	0	0	0	0	0	0	0	105	690	5	0	0	0	0	20	0	0	0	0	0	0	25	36	0	0	0	0	167	0
Prochilodus_magdalenae	0	19	107	11	40	2	1	3	0	0	0	2	22	207	0	0	5	0	0	0	1	0	0	0	0	0	23	29	236	0	0	0	0	0	0	0	0	0	0	0	0	0	0	0	1	0	0	0	0
Gymnocypris_eckloni	0	5	38	8	21	1	1	0	0	0	0	2	16	92	0	0	1	0	3	0	1	0	0	0	0	0	8	13	105	0	0	0	0	0	0	0	0	0	0	0	0	0	0	0	0	0	0	0	0
Ginglymostoma_cirratum	0	1	0	0	0	0	2	0	0	0	0	4	0	7	1	0	0	0	0	1	0	0	0	0	0	0	0	2	9	0	0	0	0	0	0	0	0	0	0	0	0	0	0	0	0	0	0	0	0
Syngnathus_scovelli	0	1	21	1	7	0	0	0	0	0	0	1	0	31	0	0	0	0	1	0	0	0	0	0	0	0	1	2	33	0	0	0	0	0	0	0	0	0	0	0	0	0	0	0	0	0	0	0	0
Accipiter_cooperii	13	0	0	0	0	32	0	0	0	0	0	1	0	46	0	0	0	0	0	6	0	0	0	0	0	0	0	6	52	1	0	0	0	0	10	0	0	0	0	0	0	11	1	0	0	0	0	38	1
Chrysocyon_brachyurus	124	0	0	0	0	506	1	0	0	0	0	0	0	631	22	2	0	0	0	91	0	0	0	0	0	0	0	115	746	0	0	0	0	0	0	0	0	0	0	0	0	0	77	0	0	0	0	254	0
Psittacara_holochlorus	5	0	0	0	0	28	0	0	0	0	0	1	0	34	0	0	0	0	0	1	0	0	0	0	0	0	0	1	35	0	0	0	0	0	6	0	0	0	0	0	0	6	0	0	0	0	0	19	0
Eupsittula_cactorum	5	0	0	0	0	34	0	0	0	0	0	1	0	40	1	0	0	0	0	2	0	0	0	0	0	0	0	3	43	0	0	0	0	0	7	0	0	0	0	0	0	7	0	0	0	0	0	77	0
Primolius_couloni	5	0	0	0	0	27	0	0	0	0	0	1	0	33	1	0	0	0	0	2	0	0	0	0	0	0	0	3	36	0	0	0	0	0	7	0	0	0	0	0	0	7	0	0	0	0	0	64	0
Psittacara_leucophthalmus	5	0	0	0	0	25	0	0	0	0	0	1	0	31	0	0	0	0	0	6	0	0	0	0	0	0	0	6	37	0	0	0	0	0	0	0	0	0	0	0	0	0	0	0	0	0	0	30	0
Poicephalus_robustus	5	0	0	0	0	20	0	0	0	0	0	1	0	26	1	0	0	0	0	9	0	0	0	0	0	0	0	10	36	0	0	0	0	0	4	0	0	0	0	0	0	4	0	0	0	0	0	25	0
Amazona_autumnalis	2	0	0	0	0	24	0	0	0	0	0	1	0	27	1	0	0	0	0	8	0	0	0	0	0	0	0	9	36	2	0	0	0	0	6	0	0	0	0	0	0	8	1	0	0	0	0	72	0
Stegophilus_panzeri	0	5	28	4	18	0	2	2	0	0	0	3	10	72	0	1	3	2	0	0	0	0	0	0	0	0	2	8	80	0	1	1	1	0	0	0	0	0	0	0	2	5	0	1	30	12	12	0	3
Cyanopsitta_spixii	5	0	0	0	0	27	0	0	0	0	0	1	0	33	1	0	0	0	0	4	0	0	0	0	0	0	0	5	38	0	0	0	0	0	0	0	0	0	0	0	0	0	0	0	0	0	0	9	0
Actenoides_hombroni	7	0	0	0	0	14	0	0	0	0	0	1	0	22	0	0	0	0	0	2	0	0	0	0	0	0	0	2	24	0	0	0	0	0	3	0	0	0	0	0	0	3	0	0	0	0	0	5	0
Diopsittaca_nobilis	5	0	0	0	0	25	0	0	0	0	0	1	0	31	1	0	0	0	0	1	0	0	0	0	0	0	0	2	33	0	0	0	0	0	7	0	0	0	0	0	0	7	1	0	0	0	0	83	0
Eptatretus_burgeri	0	0	0	0	0	0	1	0	86	0	29	0	0	116	0	0	0	0	0	0	0	0	5	0	2	0	0	7	123	0	0	0	0	0	0	0	0	0	1	0	0	1	0	0	0	0	0	0	0
Neodontobutis_hainanensis	0	2	93	6	7	0	1	0	0	0	0	1	25	135	0	1	16	0	2	0	0	1	0	0	0	0	3	23	158	0	0	0	0	0	0	0	0	0	0	0	0	0	0	0	0	0	0	0	0
Pionus_maximiliani	4	0	0	0	0	21	0	0	0	0	0	1	0	26	0	0	0	0	0	4	0	0	0	0	0	0	0	4	30	1	0	0	0	0	11	0	0	0	0	0	0	12	0	0	0	0	0	51	0
Cacatua_alba	5	0	0	0	0	21	0	0	0	0	0	1	0	27	0	0	0	0	0	7	0	0	0	0	0	0	0	7	34	0	0	0	0	0	4	0	0	0	0	0	0	4	1	0	1	0	0	76	0
Psittacara_wagleri	5	0	0	0	0	27	0	0	0	0	0	1	0	33	1	0	0	0	0	3	0	0	0	0	0	0	0	4	37	0	0	0	0	0	5	0	0	0	0	0	0	5	0	0	0	0	0	86	0
Silurus_asotus	0	13	36	18	31	0	1	1	0	0	0	2	15	117	0	0	5	1	1	0	0	0	0	0	0	0	4	11	128	0	1	0	0	0	0	0	1	0	0	0	1	3	0	0	10	0	0	0	1
Setophaga_petechia	3	0	0	0	0	785	0	0	0	0	0	1	0	789	0	0	0	0	0	80	0	0	0	0	0	0	0	80	869	0	0	0	0	0	0	0	0	0	0	0	0	0	0	0	0	0	0	1	0
Callocephalon_fimbriatum	2	0	0	0	0	18	0	0	0	0	0	1	0	21	0	0	0	0	0	3	0	0	0	0	0	0	0	3	24	2	0	0	0	0	6	0	0	0	0	0	0	8	5	0	0	0	0	32	0
Aratinga_maculata	4	0	0	0	0	29	0	0	0	0	0	1	0	34	1	0	0	0	0	3	0	0	0	0	0	0	0	4	38	0	0	0	0	0	3	0	0	0	0	0	0	3	0	0	0	0	0	74	0
Pyrrhura_roseifrons	5	0	0	0	0	29	0	0	0	0	0	1	0	35	0	0	0	0	0	3	0	0	0	0	0	0	0	3	38	0	0	0	0	0	3	0	0	0	0	0	0	3	1	0	0	0	0	84	0
Eos_semilarvata	4	0	0	0	0	14	0	0	0	0	0	1	0	19	0	0	0	0	0	4	0	0	0	0	0	0	0	4	23	1	0	0	0	0	5	0	0	0	0	0	0	6	0	0	0	0	0	68	0
Hyperoodon_ampullatus	3	0	0	0	0	32	0	0	0	0	0	0	0	35	4	0	0	0	0	22	0	0	0	0	0	0	0	26	61	0	0	0	0	0	0	0	0	0	0	0	0	0	0	0	0	0	0	1	0
Leptodoras_oyakawai	0	6	25	3	14	0	2	0	0	0	0	2	7	59	0	0	0	0	2	0	0	3	0	0	0	0	2	7	66	0	1	0	0	2	0	0	0	0	0	0	0	3	0	1	15	3	7	0	0
Aquila_nipalensis	11	0	0	0	0	38	0	0	0	0	0	1	0	50	0	0	0	0	0	7	0	0	0	0	0	0	0	7	57	2	0	0	0	0	16	0	0	0	0	0	0	18	2	0	0	0	0	74	0
Accipiter_hiogaster	10	0	0	0	0	34	0	0	0	0	0	1	0	45	0	0	0	0	0	3	0	0	0	0	0	0	0	3	48	1	0	0	0	0	4	0	0	0	0	0	0	5	1	0	0	0	0	51	0
Perognathus_longimembris	85	2	0	0	0	718	0	0	0	0	0	1	0	806	6	0	0	0	0	81	0	0	0	0	0	0	0	87	893	0	0	0	0	0	0	0	0	0	0	0	0	0	0	0	0	0	0	0	0
Oostethus_manadensis	0	1	12	1	5	0	0	0	0	0	0	1	2	22	0	0	0	0	2	0	0	0	0	0	0	0	0	2	24	0	0	0	0	0	0	0	0	0	0	0	0	0	0	0	0	0	0	0	0
Falco_tinnunculus	9	0	0	0	0	20	0	0	0	0	0	1	0	30	0	0	0	0	0	1	0	0	0	0	0	0	0	1	31	0	0	0	0	0	0	0	0	0	0	0	0	0	0	0	0	0	0	1	0
Falco_peregrinus_peregrinator	7	0	0	0	0	25	0	0	0	0	0	1	0	33	0	0	0	0	0	2	0	0	0	0	0	0	0	2	35	0	0	0	0	0	0	0	0	0	0	0	0	0	0	0	0	0	0	1	0
Falco_peregrinus_peregrinus	9	0	0	0	0	28	0	0	0	0	0	1	0	38	0	0	0	0	0	2	0	0	0	0	0	0	0	2	40	0	0	0	0	0	0	0	0	0	0	0	0	0	0	0	0	0	0	0	0
Falco_pelegrinoides	10	0	0	0	0	22	0	0	0	0	0	1	0	33	0	0	0	0	0	2	0	0	0	0	0	0	0	2	35	0	0	0	0	0	0	0	0	0	0	0	0	0	0	0	0	0	0	1	0
Pterophyllum_scalare	0	3	15	1	10	0	0	0	0	0	0	0	8	37	0	1	8	0	1	0	0	0	0	0	0	0	2	12	49	0	0	0	0	0	0	0	0	0	0	0	0	0	0	0	1	1	1	0	0
Daboia_siamensis	21	1	0	0	0	338	1	0	0	0	0	1	0	362	1	0	0	0	0	50	0	0	0	0	0	0	0	51	413	1	0	0	0	0	10	0	0	0	0	0	0	11	0	0	0	0	0	29	0
Pyrrhura_hoffmanni	5	0	0	0	0	30	0	0	0	0	0	1	0	36	0	0	0	0	0	2	0	0	0	0	0	0	0	2	38	0	0	0	0	0	8	0	0	0	0	0	0	8	0	0	0	0	0	77	0
Darevskia_valentini	46	3	0	0	0	443	1	0	0	0	0	1	0	494	2	0	0	0	0	58	0	0	0	0	0	0	0	60	554	0	0	0	0	0	11	0	0	0	0	0	0	11	11	0	0	0	0	71	0
Halcyon_malimbica	6	0	0	0	0	18	0	0	0	0	0	1	0	25	2	0	0	0	0	5	0	0	0	0	0	0	0	7	32	0	0	0	0	0	4	0	0	0	0	0	0	4	0	0	0	0	0	294	0
Pyrrhura_lucianii	5	0	0	0	0	32	0	0	0	0	0	1	0	38	0	0	0	0	0	3	0	0	0	0	0	0	0	3	41	0	0	0	0	0	2	0	0	0	0	0	0	2	2	0	0	0	0	115	0
Entomyzon_cyanotis	7	0	0	0	0	32	0	0	0	0	0	1	0	40	0	0	0	0	0	11	0	0	0	0	0	0	0	11	51	0	0	0	0	0	0	0	0	0	0	0	0	0	0	0	0	0	0	2	0
Vulpes_ferrilata	152	1	0	0	0	612	1	0	0	0	0	0	0	766	5	1	0	0	0	56	0	0	0	0	0	0	0	62	828	0	0	0	0	0	0	0	0	0	0	0	0	0	0	0	0	0	0	0	0
Gulo_gulo	73	1	0	0	0	309	1	0	0	0	0	0	0	384	6	0	0	0	0	40	0	0	0	0	0	0	0	46	430	67	1	0	0	0	358	0	0	0	0	0	0	426	22	0	0	0	0	199	0
Pogona_vitticeps	3	0	0	0	0	174	0	0	0	0	0	1	0	178	0	0	0	0	0	25	0	0	0	0	0	0	0	25	203	0	0	0	0	0	7	0	0	0	0	0	0	7	0	0	0	0	0	56	0
Labrus_bergylta	0	4	54	5	11	0	2	1	0	0	0	1	4	82	0	0	6	0	8	1	0	0	0	0	0	0	1	16	98	0	0	0	0	0	0	0	0	0	0	0	0	0	0	0	1	0	1	0	0
Leuciscus_waleckii	0	2	5	2	7	0	1	0	0	0	0	0	0	17	0	2	7	1	4	1	0	0	0	0	0	0	3	18	35	0	0	0	0	0	0	0	0	0	0	0	0	0	0	0	1	0	0	0	0
Saxicola_maurus	0	0	0	0	0	3	0	0	0	0	0	0	0	3	1	0	0	0	0	0	0	0	0	0	0	0	0	1	4	1	0	0	0	0	42	0	0	0	0	1	0	44	0	0	0	0	0	6	0
Lacerta_bilineata	56	3	0	0	0	508	1	0	0	0	0	1	0	569	5	1	0	0	0	78	0	0	0	0	0	0	0	84	653	0	0	0	0	0	1	0	0	0	0	0	0	1	0	0	0	0	0	5	0
Lacerta_viridis	61	4	0	0	0	566	1	0	0	0	0	1	0	633	1	1	1	0	0	88	0	0	0	0	0	0	0	91	724	0	0	0	0	0	0	0	0	0	0	0	0	0	0	0	0	0	0	7	0
Melanogrammus_aeglefinus	0	1	44	3	29	1	0	0	0	0	0	2	13	93	0	0	5	0	5	0	0	1	0	0	0	0	1	12	105	0	0	0	0	0	0	0	0	0	0	0	0	0	0	0	0	0	0	0	0
Osmerus_eperlanus	0	4	34	2	6	0	2	0	0	0	0	1	4	53	0	0	4	2	0	2	0	1	0	0	0	0	2	11	64	0	0	2	0	0	0	0	0	0	0	0	0	2	0	0	6	1	2	0	0
Percopsis_transmontana	0	0	26	4	8	0	1	1	0	0	0	1	6	47	0	0	8	1	3	0	0	0	0	0	0	0	0	12	59	0	0	0	1	0	0	0	0	0	0	1	0	2	0	1	8	0	0	0	0
Parasudis_fraserbrunneri	0	1	34	3	9	0	1	0	0	0	0	2	2	52	0	0	8	0	5	0	0	0	0	0	0	0	0	13	65	0	0	1	0	0	0	0	0	0	0	0	2	3	0	0	13	0	3	1	0
Polymixia_japonica	0	1	30	3	8	0	1	0	0	0	0	2	5	50	0	0	3	0	0	0	0	0	0	0	0	0	0	3	53	0	0	1	0	1	0	0	0	0	0	0	0	2	0	0	24	0	1	0	0
Phycis_blennoides	0	1	26	2	10	0	0	1	0	0	0	2	8	50	0	0	6	0	2	1	0	0	0	0	0	0	0	9	59	0	0	4	0	1	0	0	0	0	0	0	0	5	0	0	2	2	1	0	0
Muraenolepis_marmorata	0	1	23	1	10	0	0	0	0	0	0	1	3	39	0	0	2	0	2	1	0	0	0	0	0	0	0	5	44	0	0	0	0	0	0	0	0	0	0	0	0	0	0	0	3	0	2	0	0
Phycis_phycis	0	1	33	3	12	0	0	0	0	0	0	1	10	60	0	0	9	0	5	1	0	1	0	0	0	1	0	17	77	0	0	2	0	0	0	0	0	0	0	0	0	2	0	0	10	0	4	0	0
Melanonus_zugmayeri	0	0	21	14	13	0	0	0	0	0	0	2	3	53	0	0	1	2	4	0	0	0	0	0	0	0	0	7	60	0	0	0	1	0	0	0	0	0	0	0	0	1	0	0	2	1	8	0	0
Cyttopsis_rosea	0	1	28	2	10	0	1	0	0	0	0	2	2	46	0	0	4	0	0	0	0	0	0	0	0	0	0	4	50	0	0	0	0	1	0	0	0	0	0	0	0	1	0	0	8	1	2	0	0
Macrourus_berglax	0	1	32	1	7	0	0	0	0	0	0	1	7	49	0	0	3	0	2	0	0	0	0	0	0	0	0	5	54	0	0	0	0	0	0	0	0	0	0	0	0	0	0	0	9	0	8	0	0
Bathygadus_melanobranchus	0	1	31	1	14	0	0	1	0	0	0	1	4	53	0	0	4	0	4	1	0	0	0	0	0	0	0	9	62	0	0	1	0	0	0	0	0	0	0	0	0	1	0	0	11	0	3	0	0
Lota_lota	0	1	20	2	7	1	0	1	0	0	0	1	6	39	0	0	3	0	2	0	0	0	0	0	0	0	0	5	44	0	0	0	0	0	0	0	0	0	0	0	0	0	0	0	5	0	3	0	0
Bregmaceros_cantori	0	0	52	1	11	0	0	0	0	0	0	2	12	78	0	0	7	0	4	0	0	0	0	0	0	0	1	12	90	0	0	0	0	0	0	0	0	0	0	0	0	0	0	0	6	0	3	0	0
Typhlichthys_subterraneus	0	0	31	1	8	0	1	0	0	0	0	2	1	44	0	0	5	1	2	0	1	0	0	0	0	0	2	11	55	0	0	2	0	0	0	0	0	0	0	0	0	2	0	0	15	2	2	0	0
Trisopterus_minutus	0	1	43	1	18	0	0	0	0	0	0	1	6	70	0	0	4	0	3	1	0	0	0	0	0	0	1	9	79	0	0	0	0	0	0	0	0	0	0	0	0	0	0	0	17	0	6	0	0
Brosme_brosme	0	1	35	0	20	1	0	1	0	0	0	1	13	72	0	0	8	0	3	0	0	0	0	0	0	0	0	11	83	0	0	1	0	0	0	0	0	0	0	0	2	3	0	0	19	1	5	0	0
Boreogadus_saida	0	0	39	2	17	1	0	0	0	0	0	2	8	69	0	0	3	0	9	0	0	1	0	0	0	0	3	16	85	0	0	0	0	0	0	0	0	0	0	0	0	0	0	1	15	0	10	0	0
Neoniphon_sammara	0	2	30	8	10	0	1	1	0	0	0	2	3	57	0	0	7	0	2	0	0	0	0	0	0	0	0	9	66	0	0	2	0	0	0	0	0	0	0	0	1	3	0	0	11	0	2	1	0
Lampris_guttatus	0	0	9	2	9	0	1	0	0	0	0	2	0	23	0	0	3	0	1	0	0	0	0	0	0	0	0	4	27	0	0	0	0	0	0	0	0	0	0	0	0	0	0	0	0	0	3	0	0
Myripristis_jacobus	0	1	34	4	10	0	1	0	0	0	0	2	4	56	0	0	10	0	2	1	0	0	0	0	0	0	1	14	70	0	0	0	0	0	0	0	0	0	0	0	0	0	0	0	11	1	3	0	0
Gadus_chalcogrammus	0	1	46	2	18	1	0	0	0	0	0	2	13	83	0	0	6	0	2	0	0	0	0	0	0	0	2	10	93	0	0	1	0	0	0	0	1	0	0	0	0	2	0	0	14	2	11	0	0
Regalecus_glesne	0	0	6	2	8	0	1	0	0	0	0	2	1	20	0	0	1	0	2	0	0	0	0	0	0	0	0	3	23	0	0	0	0	1	0	0	0	0	0	0	0	1	0	0	3	0	1	0	0
Gadiculus_argenteus	0	0	31	1	13	1	0	0	0	0	0	1	6	53	0	0	7	0	6	0	0	0	0	0	0	0	0	13	66	0	0	0	0	0	0	0	0	0	0	0	0	0	0	0	10	0	16	0	0
Rondeletia_loricata	0	0	2	3	4	0	0	0	0	0	0	2	0	11	0	0	1	0	0	0	0	0	0	0	0	0	0	1	12	0	0	0	0	0	0	0	0	0	0	0	0	0	0	0	0	1	0	0	1
Holocentrus_rufus	0	2	37	8	8	1	1	0	0	0	0	2	4	63	0	0	11	0	3	0	0	1	0	0	0	0	1	16	79	0	0	0	0	0	0	0	0	0	0	0	0	0	0	5	13	0	4	0	0
Chatrabus_melanurus	0	2	23	5	9	0	0	0	0	0	0	1	3	43	0	0	1	0	2	0	0	0	0	0	0	0	2	5	48	0	0	0	0	1	0	0	0	0	0	0	0	1	0	0	13	0	2	0	1
Sebastes_norvegicus	0	1	48	4	6	0	1	1	0	0	0	1	4	66	0	0	9	0	5	2	0	0	0	0	0	0	3	19	85	0	0	0	0	0	0	0	0	0	0	0	0	0	0	0	22	0	6	2	0
Spondyliosoma_cantharus	0	1	49	3	10	0	0	1	0	0	0	0	4	68	0	2	13	0	5	0	0	1	0	0	0	0	2	23	91	0	0	4	0	0	0	0	0	0	0	1	0	5	0	1	27	1	15	0	2
Helostoma_temminkii	0	4	70	6	17	0	1	1	0	0	0	1	22	122	0	2	18	0	6	3	0	0	0	0	0	0	6	35	157	0	0	4	0	0	0	0	0	0	0	0	1	5	0	3	45	3	2	0	0
Parablennius_parvicornis	0	1	29	2	8	1	0	0	0	0	0	1	11	53	0	0	3	0	4	0	0	0	0	0	0	0	0	7	60	0	0	1	0	2	0	0	0	0	0	0	0	3	0	1	8	0	1	0	1
Chromis_chromis	0	3	37	1	14	0	0	1	0	0	0	1	3	60	0	0	4	1	2	0	0	0	0	0	0	0	2	9	69	0	0	1	0	1	0	0	0	0	0	0	0	2	0	0	11	0	2	0	2
Mora_moro	0	1	21	1	9	0	0	1	0	0	0	1	6	40	0	0	5	0	4	0	0	0	0	0	0	0	0	9	49	0	0	1	0	0	0	0	0	0	0	0	0	1	0	0	5	0	1	0	0
Trachyrincus_scabrus	0	1	25	1	8	0	0	0	0	0	0	2	5	42	0	0	3	0	2	1	0	0	0	0	0	0	0	6	48	0	0	1	0	0	0	0	0	0	0	0	0	1	0	0	6	0	5	0	0
Laemonema_laureysi	0	1	23	1	15	0	0	1	0	0	0	1	9	51	0	0	3	0	1	0	0	0	0	0	0	0	0	4	55	0	0	0	0	0	0	0	0	0	0	0	0	0	0	0	4	0	2	0	0
Arctogadus_glacialis	0	0	48	2	17	1	0	0	0	0	0	1	11	80	0	0	2	0	3	0	0	1	0	0	0	0	3	9	89	0	0	0	0	0	0	0	0	0	0	0	0	0	0	0	13	2	5	0	0
Selene_dorsalis	0	4	45	5	27	0	0	2	0	0	0	1	10	94	0	0	12	0	6	1	0	0	0	0	0	0	0	19	113	0	0	1	0	1	0	0	0	0	0	0	0	2	0	0	21	2	13	0	2
Lesueurigobius_sanzi	0	2	45	3	4	0	1	0	0	0	0	1	6	62	0	0	8	0	6	0	0	0	0	0	0	0	0	14	76	0	0	0	0	0	0	0	0	0	0	0	0	0	0	0	3	0	0	0	0
Brotula_barbata	0	1	36	3	15	0	1	0	0	0	0	1	11	68	0	0	5	0	2	0	0	0	0	0	0	0	0	7	75	0	0	0	0	0	0	0	0	0	0	0	0	0	0	0	9	0	2	0	0
Antennarius_striatus	0	2	24	3	10	0	0	0	0	0	0	1	1	41	0	0	6	0	2	0	0	0	0	0	0	0	0	8	49	0	0	1	0	1	0	0	0	0	0	0	0	2	0	0	11	1	1	0	0
Rhinella_marina	32	9	12	5	32	726	1	0	0	0	0	3	0	820	2	1	3	0	1	179	0	0	0	0	0	0	0	186	1006	0	0	0	0	0	0	0	0	0	0	0	0	0	0	0	0	0	1	6	0
Merluccius_merluccius	0	1	32	1	15	0	0	0	0	0	0	0	5	54	0	0	12	0	2	1	0	0	0	0	0	0	1	16	70	0	0	1	0	0	0	0	0	0	0	0	0	1	0	0	15	0	9	0	0
Lamprogrammus_exutus	0	1	38	2	7	0	0	1	0	0	0	1	5	55	0	0	4	0	3	1	0	0	0	0	0	0	0	8	63	0	0	0	0	0	0	0	0	0	0	0	0	0	0	0	9	0	6	0	2
Beryx_splendens	0	1	9	5	4	0	0	1	0	0	0	2	2	24	0	0	2	0	3	0	0	0	0	0	0	0	0	5	29	0	0	1	0	0	0	0	0	0	0	0	0	1	0	0	6	1	2	1	0
Acanthochaenus_luetkenii	0	0	14	1	2	0	0	0	0	0	0	0	3	20	0	0	0	0	0	0	0	0	0	0	0	0	0	0	20	0	0	0	0	0	0	0	0	0	0	0	0	0	0	0	4	0	0	0	0
Malacocephalus_occidentalis	0	1	36	0	11	1	0	0	0	0	0	2	8	59	0	0	5	0	3	0	0	0	0	0	0	0	1	9	68	0	0	0	0	0	0	0	0	0	0	0	0	0	0	0	14	0	3	0	0
Guentherus_altivela	0	0	11	0	2	0	0	0	0	0	0	1	1	15	0	0	1	0	2	0	0	0	0	0	0	0	1	4	19	0	0	0	0	0	0	0	0	0	0	0	0	0	0	0	9	1	7	0	2
Stylephorus_chordatus	0	0	12	1	2	0	0	0	0	0	0	1	1	17	0	0	5	0	3	0	0	0	0	0	0	0	0	8	25	0	0	2	0	0	0	0	0	0	0	1	0	3	0	0	6	0	1	0	0
Merluccius_polli	0	1	41	1	18	0	0	0	0	0	0	0	10	71	0	0	11	0	6	1	0	0	0	0	0	0	0	18	89	0	0	1	0	0	0	0	0	0	0	0	0	1	0	0	16	2	11	0	0
Pollachius_virens	0	1	41	2	24	1	0	1	0	0	0	2	13	85	0	0	6	0	1	0	0	0	0	0	0	0	1	8	93	0	0	0	0	0	0	0	0	0	0	0	0	0	0	0	12	1	3	0	0
Carapus_acus	0	1	110	5	9	0	1	0	0	0	0	1	29	156	0	0	9	0	1	0	0	0	0	0	0	0	5	15	171	0	0	1	0	0	0	0	0	0	0	0	0	1	0	0	23	0	1	0	0
Merluccius_capensis	0	1	27	2	15	1	0	0	0	0	0	0	8	54	0	0	7	0	11	0	0	0	0	0	0	0	0	18	72	0	0	1	0	1	0	0	0	0	0	0	0	2	0	0	14	0	5	0	0
Myoxocephalus_scorpius	0	0	26	2	3	0	0	0	0	0	0	1	6	38	0	0	3	0	0	0	0	0	0	0	0	0	1	4	42	0	0	1	0	0	0	0	0	0	0	0	0	1	0	0	7	1	1	1	1
Molva_molva	0	1	36	2	13	1	0	0	0	0	0	2	9	64	0	0	3	0	4	0	0	0	0	0	0	0	0	7	71	0	0	1	0	1	0	0	0	0	0	0	0	2	0	0	20	0	9	0	0
Trachyrincus_murrayi	0	1	33	0	13	0	0	0	0	0	0	2	7	56	0	0	0	2	2	1	0	0	0	0	0	0	0	5	61	0	0	1	0	2	0	0	0	0	0	0	0	3	0	0	7	1	1	0	0
Borostomias_antarcticus	0	0	15	1	4	0	0	0	0	0	0	0	6	26	0	0	4	0	2	0	0	0	0	0	0	0	0	6	32	0	0	0	0	1	0	0	0	0	0	0	0	1	0	0	3	0	4	0	0
Zeus_faber	0	1	29	4	16	0	0	0	0	0	0	1	2	53	0	0	6	0	5	0	0	0	0	0	0	0	2	13	66	0	0	0	0	0	0	0	0	0	0	1	0	1	0	0	10	0	7	0	0
Pseudochromis_fuscus	0	1	39	3	7	0	0	0	0	0	0	1	7	58	0	0	4	0	3	0	1	1	0	0	0	0	3	12	70	0	0	3	0	0	0	0	0	0	0	0	0	3	0	0	11	2	2	0	1
Merlangius_merlangus	0	1	47	2	23	1	0	0	0	0	0	2	15	91	0	0	7	0	3	0	0	1	0	0	0	0	1	12	103	0	0	2	0	1	0	0	0	0	0	0	0	3	0	0	15	2	8	0	0
Monocentris_japonicus	0	1	20	4	11	0	1	0	0	0	0	2	7	46	0	0	4	0	2	0	0	0	0	0	0	0	1	7	53	0	0	0	1	0	0	0	0	0	0	0	0	1	0	0	10	0	1	0	0
Benthosema_glaciale	0	0	10	0	0	0	0	1	0	0	0	2	3	16	0	0	3	0	0	0	0	1	0	0	0	0	1	5	21	0	0	0	0	0	0	0	0	0	0	0	0	0	0	0	1	0	3	0	1
Simochromis_diagramma	0	3	109	8	34	0	1	1	0	0	0	1	26	183	0	0	5	0	4	1	0	0	0	0	0	0	6	16	199	0	0	0	0	0	0	0	0	0	0	0	0	0	0	0	0	0	0	0	0
Danionella_dracula	0	2	30	3	18	0	2	4	0	0	0	2	12	73	0	0	1	0	1	0	0	0	0	0	0	0	2	4	77	0	0	0	0	0	0	0	0	0	0	0	0	0	0	0	0	0	0	0	0
Arapaima_gigas	0	4	18	6	29	1	1	0	0	0	0	1	9	69	0	1	2	0	1	0	0	0	0	0	0	0	7	11	80	0	1	9	1	12	0	0	0	0	0	0	2	25	0	1	2	2	8	0	0
Vombatus_ursinus	162	2	0	0	0	973	0	0	0	0	0	2	0	1139	23	1	0	0	0	121	0	0	0	0	0	0	0	145	1284	2	0	0	0	0	32	0	0	0	0	0	0	34	12	0	0	0	0	108	0
Notechis_scutatus	11	0	0	0	0	237	1	0	0	0	0	1	0	250	5	2	0	0	0	53	0	0	0	0	0	0	0	60	310	0	0	0	0	0	11	0	0	0	0	0	0	11	0	0	0	0	0	48	0
Pseudonaja_textilis	10	0	0	0	0	219	1	0	0	0	0	1	0	231	3	2	0	0	0	45	0	0	0	0	0	0	0	50	281	0	0	0	0	0	2	0	0	0	0	0	0	2	1	0	0	0	0	33	0
Epinephelus_coioides	0	6	80	6	27	0	1	1	0	0	0	0	10	131	0	1	18	0	7	5	0	0	0	0	0	0	4	35	166	0	0	0	0	0	0	0	0	0	0	0	0	0	0	0	1	0	0	0	0
Trachinotus_ovatus	0	4	56	4	34	1	1	1	0	0	0	1	8	110	0	0	15	1	5	1	0	0	0	0	0	0	1	23	133	0	0	0	0	0	0	0	0	0	0	0	0	0	0	0	1	0	0	0	0
Hypoplectrus_puella	0	3	64	3	16	0	1	0	0	0	0	1	9	97	0	0	9	0	4	1	0	0	0	0	0	0	3	17	114	0	0	3	0	0	0	0	0	0	0	0	0	3	0	0	8	2	2	0	0
Arctocephalus_gazella	15	0	0	0	0	161	1	0	0	0	0	0	0	177	7	0	0	0	0	60	0	0	0	0	0	0	0	67	244	0	0	0	0	0	1	0	0	0	0	0	0	1	0	0	0	0	0	5	0
Diretmus_argenteus	0	1	8	2	3	0	0	0	0	0	0	1	1	16	0	0	0	1	1	0	0	0	0	0	0	0	1	3	19	0	0	3	0	0	0	0	0	0	0	0	0	3	0	1	5	0	1	0	0
Cetomimus_sp_NI1144	0	0	2	1	0	0	0	0	0	0	0	0	0	3	0	0	0	0	0	0	0	0	0	0	0	0	0	0	3	0	0	0	0	0	0	0	0	0	0	0	0	0	0	0	0	0	0	0	0
Diretmoides_pauciradiatus	0	3	9	3	10	0	0	1	0	0	0	2	2	30	0	0	6	1	4	0	0	0	0	0	0	0	1	12	42	0	0	1	0	1	0	0	0	0	0	0	0	2	0	0	10	1	3	0	0
Opsanus_beta	0	1	19	3	8	0	1	0	0	0	0	1	5	38	0	0	4	0	4	0	0	0	0	0	0	0	1	9	47	0	0	1	0	0	0	0	0	0	0	0	0	1	0	0	19	1	3	0	0
Hoplostethus_atlanticus	0	3	23	1	7	0	1	0	0	0	0	2	3	40	0	0	2	0	0	0	0	0	0	0	0	0	2	4	44	0	0	0	0	0	0	0	0	0	0	0	0	0	0	0	17	0	3	0	0
Gephyroberyx_darwinii	0	1	24	4	6	0	1	0	0	0	0	2	4	42	0	0	6	1	4	0	0	0	0	0	0	0	0	11	53	0	0	1	1	0	0	0	0	0	0	0	0	2	0	0	15	0	2	0	0
Lynx_pardinus	123	1	0	0	0	615	1	0	0	0	0	0	0	740	11	0	0	0	0	64	0	0	0	0	0	0	0	75	815	3	0	0	0	0	32	0	0	0	0	0	0	35	6	0	0	0	0	45	0
Anoplogaster_cornuta	0	0	7	1	1	0	0	0	0	0	0	2	1	12	0	0	1	0	0	0	0	0	0	0	0	0	1	2	14	0	0	0	0	0	0	0	0	0	0	0	0	0	0	0	2	0	0	0	0
Aeoliscus_strigatus	0	3	19	2	5	0	0	0	0	0	0	1	2	32	0	0	0	0	2	0	0	0	0	0	0	0	0	2	34	0	0	2	0	0	0	0	0	0	0	0	0	2	0	0	6	0	0	0	0
Fistularia_tabacaria	0	2	21	2	13	0	1	0	0	0	0	1	3	43	0	0	3	0	5	0	0	0	0	0	0	0	0	8	51	0	0	0	0	1	0	0	0	0	0	0	0	1	0	0	3	0	2	0	0
Dactylopterus_volitans	0	6	33	3	11	2	1	1	0	0	0	1	8	66	0	1	8	0	4	0	0	0	0	0	0	0	2	15	81	0	0	5	0	2	0	0	0	0	0	0	0	7	0	2	21	1	17	0	0
Hippocampus_kuda	0	1	16	1	5	0	0	0	0	0	0	1	0	24	0	0	1	0	0	0	0	0	0	0	0	0	1	2	26	0	0	1	0	0	0	0	0	0	0	0	0	1	0	0	0	0	2	0	0
Dunckerocampus_dactyliophorus	0	1	12	0	5	0	0	0	0	0	0	1	2	21	0	0	4	0	0	0	0	0	0	0	0	0	0	4	25	0	0	2	0	0	0	0	0	0	0	0	0	2	0	0	1	0	2	0	0
Entelurus_aequoreus	0	1	9	1	4	0	0	1	0	0	0	1	0	17	0	0	0	0	1	0	0	0	0	0	0	0	1	2	19	0	0	0	0	0	0	0	0	0	0	0	0	0	0	0	2	0	0	0	0
Hippocampus_whitei	0	1	15	1	7	0	0	0	0	0	0	1	0	25	0	0	1	0	0	0	0	0	0	0	0	0	1	2	27	0	0	1	0	0	0	0	0	0	0	0	0	1	0	0	1	0	1	0	0
Macroramphosus_scolopax	0	1	13	2	7	0	1	1	0	0	0	1	3	29	0	0	3	0	1	0	0	0	0	0	0	0	0	4	33	0	0	0	0	1	0	0	0	0	0	0	0	1	0	0	6	0	3	0	0
Syngnathus_rostellatus	0	1	15	1	5	0	0	0	0	0	0	1	0	23	0	0	0	0	2	0	0	0	0	0	0	0	1	3	26	0	0	0	0	0	0	0	0	0	0	0	0	0	0	0	3	0	0	0	0
Nerophis_ophidion	0	1	16	1	5	0	0	1	0	0	0	1	0	25	0	0	1	0	0	0	0	0	0	0	0	0	0	1	26	0	0	0	0	1	0	0	0	0	0	0	0	1	0	0	0	0	1	0	0
Syngnathus_typhle	0	1	10	1	5	0	0	0	0	0	0	1	0	18	0	0	1	0	1	0	0	0	0	0	0	0	1	3	21	0	0	3	0	0	0	0	0	0	0	0	0	3	0	0	4	0	0	0	0
Anguilla_obscura	0	1	106	2	19	3	1	1	0	0	0	2	29	164	0	0	7	0	1	1	0	0	0	0	0	0	9	18	182	0	0	2	0	0	0	0	0	0	0	0	2	4	0	0	23	1	6	0	0
Anguilla_megastoma	0	1	90	2	22	3	1	1	0	0	0	2	37	159	0	0	16	1	2	1	1	0	0	0	0	0	3	24	183	0	0	0	0	0	0	0	0	0	0	0	1	1	0	0	16	0	6	1	0
Anguilla_marmorata	0	1	91	2	20	4	1	1	0	0	0	2	36	158	0	0	8	0	0	0	1	0	0	0	0	0	4	13	171	0	0	1	0	1	0	0	0	0	0	0	0	2	0	0	12	3	5	0	0
Tyto_alba_alba	12	0	0	0	0	48	0	0	0	0	0	1	0	61	1	0	0	0	0	12	0	0	0	0	0	0	0	13	74	1	0	0	0	0	25	0	0	0	0	0	0	26	0	0	0	0	0	32	0
Aratinga_solstitialis	4	0	0	0	0	33	0	0	0	0	0	1	0	38	1	0	0	0	0	6	0	0	0	0	0	0	0	7	45	0	0	0	0	0	4	0	0	0	0	0	0	4	0	0	0	0	0	5	0
Peromyscus_nudipes	123	1	0	0	0	784	1	0	0	0	0	0	0	909	4	0	0	0	0	66	0	0	0	0	0	0	0	70	979	0	0	0	0	0	5	0	0	0	0	0	0	5	10	0	0	0	0	105	0
Peromyscus_aztecus	114	1	0	0	0	772	1	0	0	0	0	0	0	888	9	2	0	0	0	70	0	0	0	0	0	0	0	81	969	1	0	0	0	0	6	0	0	0	0	0	0	7	17	0	0	0	0	100	0
Peromyscus_melanophrys	119	1	0	0	0	758	1	0	0	0	0	0	0	879	8	0	0	0	0	62	0	0	0	0	0	0	0	70	949	2	0	0	0	0	6	0	0	0	0	0	0	8	12	0	0	0	0	81	0
Peromyscus_attwateri	117	1	0	0	0	782	1	0	0	0	0	0	0	901	7	2	0	0	0	61	0	0	0	0	0	0	0	70	971	0	0	0	0	0	3	0	0	0	0	0	0	3	5	0	0	0	0	66	0
Mustela_putorius	131	0	0	0	0	615	1	0	0	0	0	0	0	747	8	1	0	0	0	77	0	0	0	0	0	0	0	86	833	12	0	0	0	0	20	0	0	0	0	0	0	32	15	0	0	0	0	144	0
Pungitius_pungitius	0	1	71	4	8	0	1	1	0	0	0	1	23	110	0	0	16	0	0	3	0	2	0	0	0	0	0	21	131	0	0	0	0	0	0	0	0	0	0	0	0	0	0	0	0	0	0	0	0
Peromyscus_eremicus	129	1	0	0	0	830	0	0	0	0	0	0	0	960	7	2	0	0	0	90	0	0	0	0	0	0	0	99	1059	3	0	0	0	0	39	0	0	0	0	0	0	42	0	0	0	0	0	13	0
Rangifer_tarandus_tarandus	113	1	0	0	0	687	1	0	0	0	0	0	0	802	12	0	0	0	0	147	0	0	0	0	0	0	0	159	961	2	0	0	0	0	21	0	0	0	0	0	0	23	9	0	0	0	0	46	0
Pteropus_giganteus	109	0	0	0	0	577	0	0	0	0	0	0	0	686	6	1	0	0	0	52	0	0	0	0	0	0	0	59	745	0	0	0	0	0	0	0	0	0	0	0	0	0	0	0	0	0	0	14	0
Mus_minutoides	126	1	0	0	0	883	1	0	0	0	0	0	0	1011	7	2	0	0	0	64	0	0	0	0	0	0	0	73	1084	2	0	0	0	0	33	0	0	0	0	0	0	35	4	0	0	0	0	71	0
Myodes_glareolus	101	1	0	0	0	870	1	0	0	0	0	0	0	973	4	2	0	0	0	67	0	0	0	0	0	0	0	73	1046	1	0	0	0	0	16	0	0	0	0	0	0	17	1	0	0	0	0	13	0
Microtus_agrestis	103	2	0	0	0	969	1	0	0	0	0	0	0	1075	6	1	0	0	0	98	0	0	0	0	0	0	0	105	1180	0	0	0	0	0	0	0	0	0	0	0	0	0	0	0	0	0	0	4	0
Alauda_arvensis	3	0	0	0	0	7	0	0	0	0	0	1	0	11	0	0	0	0	0	4	0	0	0	0	0	0	0	4	15	0	0	0	0	0	13	0	0	0	0	0	0	13	0	0	0	0	0	10	0
Petrochromis_trewavasae	0	3	80	4	31	1	1	1	0	0	0	1	24	146	0	0	18	0	3	0	0	0	0	0	0	0	4	25	171	0	0	11	2	7	0	0	0	0	0	0	5	25	0	0	7	0	2	0	0
Tropheus_moorii	0	3	79	6	37	1	3	1	0	0	0	1	14	145	0	0	9	0	5	0	0	0	0	0	0	0	7	21	166	0	0	18	1	4	0	0	0	0	0	0	4	27	0	0	7	2	3	0	0
Syncerus_caffer	147	1	0	0	0	724	1	0	0	0	0	0	0	873	29	1	0	0	0	163	0	0	0	0	0	0	0	193	1066	0	0	0	0	0	0	0	0	0	0	0	0	0	0	0	0	0	0	10	0
Harpagifer_antarcticus	0	1	88	1	17	0	1	0	0	0	0	1	8	117	0	0	11	0	2	0	0	1	0	0	0	0	0	14	131	0	0	0	0	0	0	0	0	0	0	0	0	0	0	0	2	0	0	0	0
Trematomus_bernacchii	0	1	134	3	27	0	1	1	0	0	0	1	21	189	0	0	17	0	8	1	0	1	0	0	0	0	5	32	221	0	0	0	0	0	0	0	0	0	0	0	0	0	0	0	0	0	0	0	0
Gymnodraco_acuticeps	0	2	92	3	23	0	0	0	0	0	0	1	7	128	0	0	12	0	7	1	0	0	0	0	0	0	2	22	150	0	0	0	0	0	0	0	0	0	0	0	0	0	0	0	1	0	1	0	0
Phalloptychus_januarius	0	3	50	6	28	0	1	1	0	0	0	1	8	98	0	0	6	0	2	0	0	1	0	0	0	0	2	11	109	0	0	0	0	0	0	0	0	0	0	0	0	0	0	0	1	0	1	0	0
Mallotus_villosus	0	3	81	8	23	0	2	0	0	0	0	1	5	123	0	0	7	0	5	0	0	0	0	0	0	1	0	13	136	0	0	1	0	0	0	0	0	0	0	0	0	1	0	0	2	0	1	0	0
Brachyrhaphis_roseni	0	1	41	5	20	0	1	0	0	0	0	1	6	75	0	0	6	0	3	0	0	0	0	0	0	0	0	9	84	0	0	1	0	0	0	0	0	0	0	0	0	1	0	7	12	2	7	0	0
Alfaro_cultratus	0	3	42	5	17	0	1	1	0	0	0	1	9	79	0	0	4	0	4	0	0	0	0	0	0	0	0	8	87	0	0	0	0	0	0	0	0	0	0	0	0	0	0	2	6	0	12	0	0
Poeciliopsis_prolifica	0	3	39	3	13	0	1	1	0	0	0	1	7	68	0	0	6	1	2	0	0	0	0	0	0	0	0	9	77	0	0	0	0	0	0	0	0	0	0	0	0	0	0	0	19	3	7	0	0
Poeciliopsis_paucimaculata	0	3	37	6	19	0	1	1	0	0	0	1	4	72	0	0	5	0	1	0	0	0	0	0	0	0	0	6	78	0	0	0	0	0	0	0	0	0	0	0	0	0	0	0	12	0	7	0	1
Brachyrhaphis_terrabensis	0	2	36	3	14	0	1	0	0	0	0	1	4	61	0	0	6	0	2	0	0	0	0	0	0	0	2	10	71	0	0	0	0	0	0	0	0	0	0	0	1	1	0	4	21	3	15	1	0
Micropoecilia_bifurca	0	3	46	5	25	0	1	1	0	0	0	0	4	85	0	0	4	0	5	0	0	1	0	0	0	1	0	11	96	0	0	0	0	0	0	0	0	0	0	0	0	0	0	3	17	2	13	0	0
Poeciliopsis_gracilis	0	2	44	5	14	0	1	1	0	0	0	1	6	74	0	0	4	1	3	0	0	0	0	0	0	0	1	9	83	0	0	0	0	0	0	0	0	0	0	0	0	0	0	2	15	1	11	0	0
Girardinus_metallicus	0	1	40	6	15	0	1	0	0	0	0	1	4	68	0	0	4	0	3	0	0	1	0	0	0	0	4	12	80	0	0	1	0	0	0	0	0	0	0	0	0	1	0	7	18	0	7	3	0
Poeciliopsis_infans	0	4	34	6	17	0	1	1	0	0	0	1	6	70	0	0	1	0	1	0	0	0	0	0	0	0	1	3	73	0	0	0	0	0	0	0	0	0	0	0	0	0	0	0	18	0	4	0	0
Poeciliopsis_presidionis	0	3	40	6	15	0	1	1	0	0	0	1	7	74	0	0	9	0	4	0	0	0	0	0	0	0	1	14	88	0	0	0	0	0	0	0	0	0	0	0	0	0	0	2	14	0	8	0	0
Poecilia_wingei	0	2	38	4	18	0	1	1	0	0	0	1	6	71	0	0	5	0	3	0	0	0	0	0	0	0	0	8	79	0	0	0	0	0	0	0	0	0	0	0	0	0	0	4	24	3	19	1	0
Poecilia_gillii	0	2	49	1	22	0	1	0	0	0	0	1	4	80	0	2	7	0	3	0	0	1	0	0	0	0	3	16	96	0	0	0	0	0	0	0	0	0	0	0	0	0	0	2	22	9	16	0	0
Diplodus_sargus	0	5	106	4	41	0	1	2	0	0	0	1	15	175	0	0	11	0	1	0	0	0	0	0	0	0	0	12	187	0	0	11	0	3	0	0	0	0	0	0	1	15	0	1	2	0	3	0	0
Mullus_surmuletus	0	1	78	2	33	0	1	1	0	0	0	1	4	121	0	0	3	0	5	0	0	1	0	0	0	0	0	9	130	0	0	7	3	7	0	0	0	0	0	0	2	19	0	0	10	0	7	0	0
Ovis_nivicola_lydekkeri	80	1	0	0	0	491	1	0	0	0	0	0	0	573	25	0	0	0	0	154	0	0	0	0	0	0	0	179	752	0	0	0	0	0	0	0	0	0	0	0	0	0	1	0	0	0	0	6	0
Serranus_cabrilla	0	5	74	4	20	0	1	2	0	0	0	1	11	118	0	0	4	0	5	1	0	0	0	0	0	0	1	11	129	0	1	6	0	0	0	0	0	0	0	0	1	8	0	0	3	0	1	0	0
Danio_albolineatus	0	7	53	7	27	1	1	1	0	0	0	2	22	121	0	1	4	1	3	0	1	0	0	0	0	0	11	21	142	0	1	1	0	1	0	0	0	0	0	0	2	5	0	0	2	2	4	0	0
Danio_jaintianensis	0	7	35	7	18	1	1	1	0	0	0	2	14	86	0	0	7	1	3	0	1	0	0	0	0	0	10	22	108	0	0	1	2	2	0	0	0	0	0	0	2	7	0	0	2	1	5	0	0
Danio_choprai	0	6	38	8	19	1	1	1	0	0	0	2	19	95	0	1	4	1	0	0	1	0	0	0	0	0	8	15	110	0	1	1	1	2	0	0	0	0	0	0	1	6	0	1	5	1	3	0	0
Danio_tinwini	0	4	43	8	31	1	1	1	0	0	0	2	18	109	0	1	4	0	2	0	1	0	0	0	0	0	10	18	127	0	0	6	1	0	0	0	0	0	0	0	0	7	0	0	4	2	1	0	0
Colossoma_macropomum	0	32	131	18	80	2	1	3	0	0	0	2	30	299	0	0	16	2	2	0	1	0	0	0	0	0	46	67	366	0	0	0	0	0	0	0	0	0	0	0	0	0	0	0	1	0	0	0	0
Fratercula_arctica	9	0	0	0	0	43	0	0	0	0	0	1	0	53	2	0	0	0	0	8	0	0	0	0	0	0	0	10	63	0	0	0	0	0	5	0	0	0	0	0	0	5	0	0	0	0	0	1	0
Nyctereutes_procyonoides	165	2	0	0	0	668	1	0	0	0	0	0	0	836	6	0	0	0	0	48	0	0	0	0	0	0	0	54	890	0	0	0	0	0	0	0	0	0	0	0	0	0	0	0	0	0	0	3	0
Cyprinus_carpio_carpio	0	12	99	19	41	1	3	2	0	0	0	4	35	216	0	2	6	0	1	0	1	0	0	0	0	0	12	22	238	0	0	0	0	0	0	0	0	0	0	0	0	0	0	0	0	0	0	0	0
Dicentrarchus_labrax	0	7	94	11	41	1	1	2	0	0	0	1	14	172	0	0	8	0	6	1	0	0	0	0	0	0	1	16	188	0	0	0	0	0	0	0	0	0	0	0	0	0	0	0	0	0	0	0	0
Bubalus_bubalis_bubalis	0	0	0	0	0	0	0	0	0	0	0	0	0	0	0	0	0	0	0	0	0	0	0	0	0	0	0	0	0	0	0	0	0	0	0	0	0	0	0	0	0	0	0	0	0	0	0	0	0
Micropoecilia_picta	0	3	37	3	16	0	0	1	0	0	0	0	5	65	0	2	15	2	9	0	1	0	0	0	0	0	2	31	96	0	0	0	0	0	0	0	0	0	0	0	0	0	0	0	0	0	0	0	0
Bombina_variegata_variegata	13	3	3	3	6	392	1	0	0	0	0	3	0	424	1	0	2	1	2	95	0	0	0	0	0	0	0	101	525	1	0	0	0	0	42	0	0	0	0	0	0	43	7	0	2	2	2	320	0
Dugong_dugon	31	0	0	0	0	287	1	0	0	0	0	0	0	319	22	1	0	0	0	119	0	0	0	0	0	0	0	142	461	0	0	0	0	0	5	0	0	0	0	0	0	5	0	0	0	0	0	15	0
Coregonus_lavaretus	0	0	0	0	0	0	0	0	0	0	0	0	0	0	0	0	0	0	0	0	0	0	0	0	0	0	0	0	0	0	0	0	0	0	0	0	0	0	0	0	0	0	0	0	0	0	0	0	0
Lophiomys_imhausi	108	1	0	0	0	668	1	0	0	0	0	0	0	778	8	1	0	0	0	102	0	0	0	0	0	0	0	111	889	6	0	0	0	0	21	0	0	0	0	0	0	27	3	0	0	0	0	29	0
Psammomys_obesus	70	1	0	0	0	505	0	0	0	0	0	0	0	576	9	0	0	0	0	60	0	0	0	0	0	0	0	69	645	5	0	0	0	0	9	0	0	0	0	0	0	14	5	0	0	0	0	22	0
Menidia_menidia	0	0	40	9	13	0	1	0	0	0	0	1	1	65	0	0	10	0	7	1	0	2	0	0	0	0	1	21	86	0	0	12	0	4	0	0	0	0	0	0	1	17	0	0	21	8	20	0	0
Lagocephalus_sceleratus	0	1	49	3	40	0	1	0	0	0	0	1	3	98	0	0	8	0	4	0	0	0	0	0	0	0	0	12	110	0	0	0	0	0	0	0	0	0	0	0	0	0	0	0	0	0	0	0	0
Ateles_hybridus	34	1	0	0	0	100	0	0	0	0	0	0	0	135	12	0	0	0	0	71	0	0	0	0	0	1	0	84	219	0	0	0	0	0	0	0	0	0	0	0	0	0	0	0	0	0	0	1	0
Helicolenus_avius	0	0	35	2	15	0	0	0	0	0	0	0	4	56	0	0	3	0	0	0	0	0	0	0	0	0	1	4	60	0	0	1	0	2	0	0	0	0	0	0	0	3	0	0	4	1	6	0	0
Adelosebastes_latens	0	4	76	5	26	2	1	1	0	0	0	1	7	123	0	0	8	0	8	2	0	0	0	0	0	0	2	20	143	0	0	1	0	0	0	0	0	0	0	0	0	1	0	1	13	0	5	0	0
Sebastes_helvomaculatus	0	2	68	4	15	2	1	1	0	0	0	1	6	100	0	0	6	0	4	2	0	0	0	0	0	0	2	14	114	0	0	1	0	0	0	0	0	0	0	0	0	1	0	0	10	1	3	0	0
Sebastes_exsul	0	4	67	3	17	2	1	1	0	0	0	1	3	99	0	0	8	0	3	2	0	0	0	0	0	0	1	14	113	0	0	1	0	0	0	0	0	0	0	0	0	1	0	0	8	0	6	0	0
Sebastes_dallii	0	3	75	4	14	2	1	1	0	0	0	1	9	110	0	0	8	0	8	2	0	0	0	0	0	0	3	21	131	0	0	1	0	0	0	0	0	0	0	0	1	2	0	0	5	0	5	0	0
Sebastes_goodei	0	3	62	4	18	1	1	1	0	0	0	1	5	96	0	0	13	0	6	3	0	0	0	0	0	0	1	23	119	0	0	0	0	0	0	0	0	0	0	0	0	0	0	0	10	0	5	0	0
Sebastes_cheni	0	3	67	4	14	1	1	1	0	0	0	1	9	101	0	0	12	0	5	2	0	0	0	0	0	0	1	20	121	0	0	0	0	0	0	0	0	0	0	0	0	0	0	0	14	1	8	0	0
Sebastes_crameri	0	3	77	3	16	1	1	1	0	0	0	1	8	111	0	0	14	0	3	2	0	0	0	0	0	0	1	20	131	0	0	1	0	0	0	0	0	0	0	0	0	1	0	0	5	1	6	0	0
Sebastes_fasciatus	0	5	74	4	14	1	1	1	0	0	0	1	5	106	0	1	10	0	5	2	0	0	0	0	0	0	3	21	127	0	0	1	0	0	0	0	0	0	0	0	0	1	0	1	11	1	7	1	0
Sebastes_entomelas	0	4	81	4	22	2	1	1	0	0	0	1	9	125	0	0	5	0	4	2	0	0	0	0	0	0	1	12	137	0	0	1	0	0	0	0	0	0	0	0	0	1	0	0	9	0	2	0	0
Sebastes_flavidus	0	5	87	4	14	1	1	1	0	0	0	1	9	123	0	0	6	0	4	2	0	0	0	0	0	0	2	14	137	0	0	1	0	0	0	0	0	0	0	0	0	1	0	1	11	1	1	0	0
Sebastes_glaucus	0	3	77	2	17	1	1	1	0	0	0	1	7	110	0	0	9	0	5	2	0	0	0	0	0	0	2	18	128	0	0	0	0	0	0	0	0	0	0	0	0	0	0	0	8	1	10	1	0
Sebastes_ciliatus	0	4	88	7	18	2	1	0	0	0	0	1	8	129	0	0	10	0	5	2	0	0	0	0	0	0	3	20	149	0	0	0	0	0	0	0	0	0	0	0	0	0	0	1	19	1	21	0	0
Helicolenus_hilgendorfi	0	0	40	5	11	0	0	0	0	0	0	0	5	61	0	0	4	0	1	0	0	0	0	0	0	0	2	7	68	0	0	2	0	0	0	0	0	0	0	0	0	2	0	0	9	1	3	0	0
Sebastes_alutus	0	3	72	4	12	3	1	1	0	0	0	1	7	104	0	0	12	0	4	1	0	0	0	0	0	0	2	19	123	0	0	1	0	0	0	0	0	0	0	0	1	2	0	0	20	1	3	0	0
Sebastes_baramenuke	0	4	73	3	17	2	1	1	0	0	0	1	9	111	0	0	9	0	6	2	0	0	0	0	0	0	3	20	131	0	0	0	0	0	0	0	0	0	0	0	0	0	0	0	16	0	5	0	0
Sebastes_caurinus	0	5	63	4	17	1	1	1	0	0	0	1	8	101	0	0	9	0	5	2	0	0	0	0	0	0	0	16	117	0	0	1	0	0	0	0	0	0	0	0	0	1	0	1	17	0	9	0	0
Sebastes_carnatus	0	3	66	4	16	2	1	1	0	0	0	1	9	103	0	0	7	0	3	2	0	0	0	0	0	0	1	13	116	0	0	3	0	0	0	0	0	0	0	0	0	3	0	0	17	0	7	0	0
Sebastes_babcocki	0	5	68	4	16	1	1	1	0	0	0	1	7	104	0	0	12	0	5	2	0	0	0	0	0	0	3	22	126	0	0	0	0	0	0	0	0	0	0	0	1	1	0	0	8	1	7	0	0
Sebastes_aleutianus	0	8	149	5	43	2	1	1	0	0	0	1	9	219	0	0	17	0	4	2	0	0	0	0	0	0	3	26	245	0	0	0	0	0	0	0	0	0	0	0	0	0	0	0	2	0	1	0	0
Sebastes_diploproa	0	3	69	4	14	1	1	1	0	0	0	2	9	104	0	0	7	0	5	2	0	0	0	0	0	0	2	16	120	0	0	0	0	0	0	0	0	0	0	0	0	0	0	0	7	1	8	0	0
Sebastes_constellatus	0	4	71	3	16	2	1	1	0	0	0	1	5	104	0	0	12	0	4	2	0	0	0	0	0	0	3	21	125	0	0	2	0	1	0	0	0	0	0	0	1	4	0	0	7	1	8	0	0
Sebastes_aurora	0	3	72	4	20	1	1	1	0	0	0	1	7	110	0	0	9	0	1	2	0	0	0	0	0	0	1	13	123	0	0	2	0	1	0	0	0	0	0	0	0	3	0	0	14	0	9	0	0
Sebastes_chlorostictus	0	3	69	3	19	1	1	1	0	0	0	1	7	105	0	0	7	0	2	2	0	0	0	0	0	0	3	14	119	0	0	2	0	0	0	0	0	0	0	0	0	2	0	0	3	0	5	0	0
Sebastes_elongatus	0	5	72	4	14	2	1	1	0	0	0	1	8	108	0	0	10	0	2	2	0	0	0	0	0	0	2	16	124	0	0	0	0	0	0	0	0	0	0	0	0	0	0	0	9	0	4	0	0
Hozukius_emblemarius	0	4	77	5	19	1	1	0	0	0	0	1	11	119	0	0	7	0	5	3	0	1	0	0	0	0	2	18	137	0	0	2	0	0	0	0	0	0	0	0	0	2	0	2	19	0	2	0	2
Sebastes_diaconus	0	4	74	4	18	2	1	1	0	0	0	1	9	114	0	0	7	0	4	2	0	0	0	0	0	0	2	15	129	0	0	3	0	2	0	0	0	0	0	0	0	5	0	2	10	1	8	0	0
Sebastes_atrovirens	0	4	72	4	16	0	1	1	0	0	0	1	6	105	0	0	10	0	4	3	0	0	0	0	0	0	2	19	124	0	0	1	0	0	0	0	0	0	0	0	0	1	0	0	7	0	6	0	0
Sebastes_ensifer	0	3	66	4	18	1	1	1	0	0	0	1	8	103	0	0	9	0	4	3	0	0	0	0	0	0	3	19	122	0	0	2	0	0	0	0	0	0	0	0	0	2	0	0	7	0	6	0	0
Sebastes_auriculatus	0	3	79	4	20	1	1	1	0	0	0	1	8	118	0	0	9	0	3	3	0	0	0	0	0	0	1	16	134	0	0	2	0	0	0	0	0	0	0	0	0	2	0	0	4	0	5	0	0
Sebastes_borealis	0	0	42	1	9	0	0	1	0	0	0	0	8	61	0	0	4	0	0	0	0	0	0	0	0	0	1	5	66	0	0	0	0	1	0	0	0	0	0	0	1	2	0	0	8	0	2	3	0
Hozukius_guyotensis	0	4	73	4	21	1	1	0	0	0	0	1	10	115	0	0	12	0	5	2	0	1	0	0	0	0	2	22	137	0	0	0	0	0	0	0	0	0	0	0	0	0	0	0	21	0	8	0	0
Sebastes_iracundus	0	3	73	4	20	2	1	1	0	0	0	1	8	113	0	0	9	0	5	2	0	0	0	0	0	0	1	17	130	0	0	0	0	0	0	0	0	0	0	0	1	1	0	0	20	1	6	0	0
Sebastes_koreanus	0	3	65	5	17	2	1	1	0	0	0	1	8	103	0	0	12	0	3	1	0	0	0	0	0	0	2	18	121	0	0	1	0	0	0	0	0	0	0	0	0	1	0	0	20	0	6	1	0
Sebastes_matsubarae	0	3	81	4	15	2	1	0	0	0	0	1	8	115	0	0	6	0	5	2	0	1	0	0	0	0	1	15	130	0	0	1	0	0	0	0	0	0	0	0	0	1	0	0	7	1	5	0	0
Sebastes_paucispinis	0	4	63	4	18	0	1	1	0	0	0	1	6	98	0	0	10	0	6	2	0	0	0	0	0	0	2	20	118	0	0	0	0	0	0	0	0	0	0	0	0	0	0	0	12	0	1	0	0
Sebastes_nebulosus	0	3	69	4	14	0	1	1	0	0	0	1	8	101	0	0	13	0	6	4	0	0	0	0	0	0	1	24	125	0	0	0	0	0	0	0	0	0	0	0	0	0	0	0	6	0	10	0	0
Sebastes_pachycephalus	0	4	79	4	23	0	1	1	0	0	0	1	6	119	0	0	10	0	6	4	0	0	0	0	0	0	1	21	140	0	0	1	0	1	0	0	0	0	0	0	0	2	0	0	15	1	6	1	0
Sebastes_inermis	0	3	70	4	14	2	1	1	0	0	0	1	10	106	0	0	10	0	5	2	0	0	0	0	0	0	1	18	124	0	0	0	0	0	0	0	0	0	0	0	0	0	0	0	15	0	10	0	0
Sebastes_oblongus	0	3	71	4	18	0	1	1	0	0	0	1	8	107	0	0	12	0	5	3	0	0	0	0	0	0	2	22	129	0	0	2	0	1	0	0	0	0	0	0	0	3	0	0	10	2	5	1	0
Sebastes_joyneri	0	3	75	4	14	1	1	1	0	0	0	1	6	106	0	0	11	0	3	2	0	0	0	0	0	0	1	17	123	0	0	1	0	0	0	0	0	0	0	0	0	1	0	0	7	2	5	1	0
Sebastes_oculatus	0	3	72	3	16	0	1	1	0	0	0	1	10	107	0	0	9	0	3	4	0	0	0	0	0	0	2	18	125	0	0	0	0	0	0	0	0	0	0	0	0	0	0	0	11	0	6	0	0
Sebastes_kiyomatsui	0	3	69	4	17	1	1	0	0	0	0	1	6	102	0	0	8	0	1	3	0	0	0	0	0	0	2	14	116	0	0	1	0	0	0	0	0	0	0	0	0	1	0	0	10	0	7	0	0
Sebastes_melanostomus	0	4	70	4	22	0	1	1	0	0	0	1	9	112	0	0	10	0	3	4	0	0	0	0	0	0	2	19	131	0	0	0	0	0	0	0	0	0	0	0	1	1	0	0	11	1	4	0	0
Sebastes_levis	0	3	64	5	18	2	1	0	0	0	0	1	8	102	0	0	10	0	6	2	0	2	0	0	0	0	2	22	124	0	0	2	0	1	0	0	0	0	0	0	0	3	0	0	4	0	0	0	0
Sebastes_mentella	0	4	75	4	14	0	1	1	0	0	0	1	7	107	0	1	8	0	6	3	0	0	0	0	0	0	5	23	130	0	0	2	0	1	0	0	0	0	0	0	0	3	0	0	12	0	10	1	0
Sebastes_hopkinsi	0	4	80	4	14	1	1	1	0	0	0	1	9	115	0	0	14	0	10	3	0	0	0	0	0	0	2	29	144	0	0	1	0	0	0	0	0	0	0	0	0	1	0	0	16	2	13	0	0
Sebastes_nudus	0	4	79	3	23	0	1	0	0	0	0	1	11	122	0	0	6	1	6	3	0	1	0	0	0	0	2	19	141	0	0	0	0	0	0	0	0	0	0	0	0	0	0	1	17	0	7	1	0
Sebastes_mystinus	0	3	78	4	20	0	1	1	0	0	0	1	10	118	0	0	9	0	3	4	0	0	0	0	0	0	1	17	135	0	0	1	0	0	0	0	0	0	0	0	0	1	0	0	5	0	10	0	0
Sebastes_pinniger	0	3	77	3	16	0	1	1	0	0	0	1	9	111	0	0	10	0	4	3	0	0	0	0	0	0	1	18	129	0	0	0	0	0	0	0	0	0	0	0	0	0	0	0	5	0	2	0	0
Sebastes_maliger	0	2	73	4	18	2	1	1	0	0	0	1	8	110	0	0	8	0	4	2	0	0	0	0	0	0	2	16	126	0	0	1	0	0	0	0	0	0	0	0	0	1	0	1	16	0	6	0	0
Sebastes_miniatus	0	10	113	5	51	0	1	1	0	0	0	1	18	200	0	1	17	0	5	3	0	0	0	0	0	0	2	28	228	0	0	0	0	0	0	0	0	0	0	0	0	0	0	0	0	0	2	0	0
Sebastes_hubbsi	0	4	81	8	16	2	1	0	0	0	0	1	9	122	0	0	11	0	6	2	0	0	0	0	0	0	1	20	142	0	0	1	0	0	0	0	0	0	0	0	0	1	0	1	16	0	5	0	0
Sebastes_jordani	0	3	66	4	14	0	1	0	0	0	0	1	8	97	0	0	5	0	2	3	0	1	0	0	0	0	2	13	110	0	0	1	0	0	0	0	0	0	0	0	0	1	0	0	3	0	7	0	0
Sebastes_minor	0	3	74	4	17	0	1	0	0	0	0	1	7	107	0	0	5	0	6	4	0	0	0	0	0	0	1	16	123	0	0	1	0	0	0	0	0	0	0	0	0	1	0	0	9	0	6	0	0
Sebastes_moseri	0	3	64	4	16	0	1	1	0	0	0	1	7	97	0	0	7	0	3	4	0	0	0	0	0	0	2	16	113	0	0	2	0	0	0	0	0	0	0	0	0	2	0	0	3	1	3	0	0
Sebastes_melanops	0	6	75	4	14	0	1	1	0	0	0	1	9	111	0	0	7	0	1	4	0	0	0	0	0	0	3	15	126	0	0	2	0	1	0	0	0	0	0	0	0	3	0	1	12	0	5	0	0
Sebastes_itinus	0	3	76	4	23	2	1	1	0	0	0	1	9	120	0	1	4	0	6	2	0	0	0	0	0	0	1	14	134	0	0	2	0	0	0	0	0	0	0	0	0	2	0	0	15	0	3	0	0
Sebastes_nivosus	0	6	78	4	15	1	1	1	0	0	0	1	10	117	0	0	8	0	3	3	0	0	0	0	0	0	2	16	133	0	0	1	0	0	0	0	0	0	0	0	0	1	0	0	15	0	13	0	0
Sebastes_saxicola	0	3	63	3	16	0	1	0	0	0	0	1	6	93	0	1	11	0	7	4	0	1	0	0	0	0	1	25	118	0	0	1	0	0	0	0	0	0	0	0	0	1	0	0	9	1	6	0	0
Sebastes_semicinctus	0	3	72	4	13	0	1	0	0	0	0	1	9	103	0	0	9	0	4	3	0	1	0	0	0	0	2	19	122	0	0	2	0	0	0	0	0	0	0	0	0	2	0	0	9	0	7	0	0
Sebastes_variegatus	0	3	73	4	14	0	1	1	0	0	0	1	10	107	0	0	8	0	7	3	0	0	0	0	0	0	1	19	126	0	0	2	0	0	0	0	0	0	0	0	0	2	0	0	20	1	5	0	0
Sebastes_zacentrus	0	4	72	4	14	0	1	1	0	0	0	1	8	105	0	0	13	0	4	3	0	0	0	0	0	0	1	21	126	0	0	1	0	0	0	0	0	0	0	0	0	1	0	0	16	0	9	0	0
Sebastes_steindachneri	0	2	63	4	14	0	1	1	0	0	0	1	6	92	0	0	8	0	4	4	0	0	0	0	0	0	1	17	109	0	0	0	0	1	0	0	0	0	0	0	0	1	0	0	10	0	2	1	0
Sebastes_rastrelliger	0	3	73	4	17	0	1	1	0	0	0	1	5	105	0	0	10	0	5	3	0	0	0	0	0	0	2	20	125	0	0	0	0	0	0	0	0	0	0	0	0	0	0	0	11	0	3	1	0
Sebastes_variabilis	0	4	74	4	20	0	1	0	0	0	0	1	12	116	0	0	12	0	4	4	0	0	0	0	0	0	2	22	138	0	0	5	0	0	0	0	0	0	0	0	0	5	0	0	17	0	17	0	0
Sebastes_serriceps	0	4	66	5	19	0	1	1	0	0	0	1	8	105	0	0	12	0	5	3	0	0	0	0	0	0	1	21	126	0	0	0	0	0	0	0	0	0	0	0	0	0	0	0	5	0	6	0	0
Sebastes_trivittatus	0	3	76	5	14	0	1	1	0	0	0	1	10	111	0	0	6	0	7	4	0	0	0	0	0	0	2	19	130	0	0	0	0	0	0	0	0	0	0	0	0	0	0	0	21	0	7	0	0
Sebastes_scythropus	0	3	71	4	11	0	1	1	0	0	0	1	6	98	0	0	8	0	4	4	0	0	0	0	0	0	1	17	115	0	0	0	0	0	0	0	0	0	0	0	0	0	0	0	6	1	6	0	0
Sebastes_proriger	0	3	77	4	19	0	1	0	0	0	0	1	7	112	0	0	7	0	7	3	0	1	0	0	0	0	1	19	131	0	0	1	0	1	0	0	0	0	0	0	0	2	0	0	9	0	7	0	0
Sebastes_polyspinis	0	4	83	3	17	0	1	0	0	0	0	1	8	117	0	0	7	0	10	3	0	0	0	0	0	0	1	21	138	0	0	0	0	0	0	0	0	0	0	0	0	0	0	0	9	2	17	1	0
Sebastes_ruberrimus	0	3	71	3	13	0	1	0	0	0	0	1	7	99	0	0	8	0	1	4	0	0	0	0	0	0	1	14	113	0	0	0	0	0	0	0	0	0	0	0	0	0	0	0	16	1	9	0	0
Sebastes_reedi	0	3	77	3	22	0	1	1	0	0	0	1	10	118	0	0	13	0	5	4	0	0	0	0	0	0	1	23	141	0	0	0	0	1	0	0	0	0	0	0	0	1	0	0	4	1	7	0	0
Sebastes_rosenblatti	0	3	66	3	15	0	1	1	0	0	0	1	7	97	0	0	8	0	3	4	0	0	0	0	0	0	1	16	113	0	0	0	0	0	0	0	0	0	0	0	0	0	0	0	10	0	4	0	0
Sebastes_rosaceus	0	8	132	5	32	0	1	2	0	0	0	1	24	205	0	1	12	0	4	4	0	0	0	0	0	0	10	31	236	0	0	0	0	0	0	0	0	0	0	0	0	0	0	0	1	0	0	0	0
Sebastes_taczanowskii	0	3	73	4	19	0	1	1	0	0	0	1	8	110	0	0	7	0	10	4	0	0	0	0	0	0	1	22	132	0	0	1	0	0	0	0	0	0	0	0	0	1	0	0	8	0	8	0	0
Sebastes_wilsoni	0	4	80	3	15	0	1	1	0	0	0	1	6	111	0	0	6	1	3	4	0	0	0	0	0	0	2	16	127	0	0	1	0	0	0	0	0	0	0	0	0	1	0	0	10	1	2	0	0
Sebastes_rubrivinctus	0	4	75	5	19	0	1	1	0	0	0	1	8	114	0	0	11	0	4	3	0	0	0	0	0	0	1	19	133	0	0	1	0	0	0	0	0	0	0	0	0	1	0	0	8	0	4	0	0
Sebastes_vulpes	0	0	21	1	5	0	0	0	0	0	0	0	4	31	0	0	2	0	3	1	0	0	0	0	0	0	1	7	38	0	0	1	0	0	0	0	0	0	0	0	0	1	0	0	4	1	0	0	0
Sebastes_thompsoni	0	2	67	3	18	0	1	1	0	0	0	1	10	103	0	0	9	0	2	3	0	0	0	0	0	0	1	15	118	0	0	0	0	0	0	0	0	0	0	0	0	0	0	2	13	0	5	0	0
Sebastes_zonatus	0	3	61	4	12	0	1	1	0	0	0	1	7	90	0	0	4	0	4	4	0	0	0	0	0	0	1	13	103	0	0	2	0	0	0	0	0	0	0	0	0	2	0	0	17	0	3	0	0
Sebastolobus_alascanus	0	4	102	4	20	0	1	1	0	0	0	1	10	143	0	0	6	0	4	3	0	0	0	0	0	0	2	15	158	0	1	2	0	2	0	0	0	0	0	0	0	5	0	0	21	0	3	0	0
Sebastiscus_albofasciatus	0	3	81	4	26	0	1	1	0	0	0	1	8	125	0	0	6	0	5	3	0	0	0	0	0	0	2	16	141	0	0	1	0	0	0	0	0	0	0	0	0	1	0	0	15	2	6	0	0
Sebastiscus_tertius	0	3	73	4	22	1	1	1	0	0	0	1	9	115	0	0	8	0	6	2	0	0	0	0	0	0	1	17	132	0	0	2	0	0	0	0	0	0	0	0	0	2	0	0	13	2	3	0	0
Sebastolobus_altivelis	0	5	84	4	15	0	1	1	0	0	0	1	10	121	0	0	5	0	6	3	0	0	0	0	0	0	2	16	137	0	0	3	0	0	0	0	0	0	0	0	0	3	0	0	27	0	6	0	0
Nanger_dama	83	0	0	0	0	291	1	0	0	0	0	0	0	375	26	2	0	0	0	177	0	0	0	0	0	0	0	205	580	0	0	0	0	0	0	0	0	0	0	0	0	0	0	0	0	0	0	5	0
Ara_rubrogenys	4	0	0	0	0	37	0	0	0	0	0	1	0	42	2	0	0	0	0	7	0	0	0	0	0	0	0	9	51	0	0	0	0	0	0	0	0	0	0	0	0	0	0	0	0	0	0	0	0
Poeciliopsis_turneri	0	4	46	6	24	0	1	1	0	0	0	1	8	91	0	0	4	0	3	0	0	0	0	0	0	0	1	8	99	0	0	0	0	0	0	0	0	0	0	0	0	0	0	0	0	0	0	0	0
Macaca_nigra	35	0	0	0	0	289	0	0	0	0	0	1	0	325	12	0	0	0	0	46	0	0	0	0	0	0	0	58	383	0	0	0	0	0	0	0	0	0	0	0	0	0	0	0	0	0	0	0	0
Tragelaphus_eurycerus	140	0	0	0	0	901	0	0	0	0	0	0	0	1041	15	1	0	0	0	191	1	0	0	0	0	0	0	208	1249	0	0	0	0	0	0	0	0	0	0	0	0	0	0	0	0	0	0	3	0
Trematomus_scotti	0	1	21	1	8	0	1	1	0	0	0	1	1	35	0	0	5	0	6	1	0	0	0	0	0	0	0	12	47	0	0	34	1	5	0	0	1	0	0	0	1	42	0	0	80	3	22	0	0
Bovichtus_diacanthus	0	1	16	3	7	1	1	1	0	0	0	1	1	32	0	0	5	0	2	0	0	0	0	0	0	0	1	8	40	0	0	0	0	0	0	0	0	0	0	0	0	0	0	0	7	0	3	0	0
Cryodraco_antarcticus	0	1	18	1	11	1	1	0	0	0	0	1	2	36	0	0	4	0	4	0	0	0	0	0	0	0	1	9	45	0	0	1	0	0	0	0	0	0	0	0	0	1	0	0	14	1	1	0	0
Akarotaxis_nudiceps	0	1	32	2	6	0	1	1	0	0	0	1	2	46	0	0	7	0	4	0	0	0	0	0	0	0	4	15	61	0	0	0	0	0	0	0	0	0	0	0	0	0	0	0	26	0	2	0	0
Notothenia_rossii	0	1	28	4	5	2	1	0	0	0	0	1	6	48	0	0	3	0	3	0	0	0	0	0	0	0	0	6	54	0	0	0	0	2	0	0	0	0	0	0	0	2	0	0	16	0	1	0	0
Vomeridens_infuscipinnis	0	1	22	2	3	0	1	1	0	0	0	1	1	32	0	0	4	0	2	1	0	1	0	0	0	0	1	9	41	0	0	37	0	2	0	0	0	0	0	0	2	41	0	0	90	2	31	0	0
Histiodraco_velifer	0	1	31	1	6	0	1	1	0	0	0	1	2	44	0	0	5	0	5	1	0	0	0	0	0	0	2	13	57	0	0	1	0	1	0	0	0	0	0	0	0	2	0	0	12	0	3	0	0
Pagetopsis_macropterus	0	1	26	1	10	0	1	0	0	0	0	1	2	42	0	0	5	0	6	0	0	0	0	0	0	0	2	13	55	0	0	0	0	0	0	0	0	0	0	0	1	1	0	0	16	0	1	0	0
Lindbergichthys_nudifrons	0	1	28	2	6	0	1	2	0	0	0	1	1	42	0	0	3	0	5	1	0	0	0	0	0	0	0	9	51	0	0	1	0	1	0	0	0	0	0	0	0	2	0	0	20	0	2	0	0
Dolloidraco_longedorsalis	0	1	18	1	6	1	1	1	0	0	0	0	0	29	0	0	8	0	3	0	0	0	0	0	0	0	2	13	42	0	0	26	0	3	0	0	1	0	0	1	2	33	0	0	72	2	17	0	0
Gobionotothen_gibberifrons	0	1	25	2	9	0	1	0	0	0	0	1	2	41	0	0	3	0	4	1	0	1	0	0	0	0	1	10	51	0	0	4	1	0	0	0	0	0	0	0	0	5	0	0	21	0	4	0	0
Bathydraco_marri	0	1	15	2	7	0	0	0	0	0	0	1	2	28	0	0	8	0	2	0	0	0	0	0	0	0	0	10	38	0	0	29	0	5	0	1	1	0	0	0	2	38	0	1	85	2	23	0	1
Lepidonotothen_squamifrons	0	1	23	2	7	1	1	1	0	0	0	1	1	38	0	0	2	0	3	0	0	0	0	0	0	0	0	5	43	0	0	13	0	3	0	0	0	0	0	0	3	19	0	0	59	1	20	0	0
Trematomus_hansoni	0	1	32	2	9	0	1	2	0	0	0	1	2	50	0	0	6	0	5	0	0	0	0	0	0	0	1	12	62	0	0	37	0	3	1	0	0	0	0	0	3	44	0	0	60	0	7	0	0
Bovichtus_variegatus	0	2	14	3	5	1	1	0	0	0	0	1	2	29	0	0	4	0	3	0	0	0	0	0	0	0	1	8	37	0	0	1	0	0	0	0	0	0	0	0	1	2	0	0	7	0	2	0	0
Chaenodraco_wilsoni	0	1	29	2	5	0	1	0	0	0	0	1	2	41	0	0	4	0	7	2	0	0	0	0	0	0	1	14	55	0	0	1	0	1	0	0	0	0	0	0	0	2	0	0	15	0	3	0	0
Chionobathyscus_dewitti	0	1	14	2	6	0	1	0	0	0	0	1	1	26	0	0	10	0	2	1	0	0	0	0	0	0	1	14	40	0	0	22	0	4	0	0	0	0	0	0	6	32	0	0	109	0	18	0	0
Lepidonotothen_larseni	0	1	19	1	7	1	1	0	0	0	0	1	1	32	0	0	8	0	4	0	0	0	0	0	0	0	0	12	44	0	0	17	0	6	0	0	0	0	0	0	3	26	0	0	80	4	19	0	1
Phodopus_roborovskii	86	0	0	0	0	680	1	0	0	0	0	0	0	767	3	1	0	0	0	68	0	0	0	0	0	0	0	72	839	0	0	0	0	0	0	0	0	0	0	0	0	0	0	0	0	0	0	0	0
Chinchilla_lanigera	93	1	0	0	0	578	0	0	0	0	0	1	0	673	13	1	0	0	0	69	0	0	0	0	0	0	0	83	756	9	0	0	0	0	40	0	0	0	0	0	0	49	3	0	0	0	0	23	0
Pteropus_alecto	96	0	0	0	0	305	0	0	0	0	0	0	0	401	11	1	0	0	0	55	0	0	0	0	0	0	0	67	468	5	0	0	0	0	35	0	0	0	0	0	0	40	7	0	0	0	0	129	2
Cyprinodon_variegatus	0	4	66	4	21	1	1	1	0	0	0	1	8	107	0	0	3	0	1	0	0	0	0	0	0	0	1	5	112	0	0	5	0	5	0	0	0	0	0	0	0	10	0	0	4	0	1	0	0
Nanorana_parkeri	21	7	15	9	15	561	1	0	0	0	0	3	0	632	2	2	0	1	0	80	0	0	0	0	0	0	0	85	717	0	0	0	0	0	5	0	0	0	0	0	0	5	0	0	1	3	2	7	0
Homo_sapiens	61	0	0	0	0	403	0	0	0	0	0	1	0	465	16	0	0	0	0	85	0	0	0	0	0	0	0	101	566	0	0	0	0	0	0	0	0	0	0	0	0	0	0	0	0	0	0	0	0
Mus_musculus	126	1	0	0	0	971	8	0	0	0	0	0	0	1106	8	2	0	0	0	73	1	0	0	0	0	0	0	84	1190	0	0	0	0	0	0	0	0	0	0	0	0	0	0	0	0	0	0	0	0
Danio_rerio	0	7	57	13	40	1	1	1	0	0	0	2	27	149	0	0	6	0	1	0	1	0	0	0	0	0	11	19	168	0	0	0	0	0	0	0	0	0	0	0	0	0	0	0	0	0	0	0	0
Monodelphis_domestica	214	3	0	0	0	957	0	0	0	0	0	2	0	1176	11	3	0	0	0	57	0	0	0	0	0	0	0	71	1247	0	1	0	0	0	7	0	0	0	0	0	0	8	1	0	0	0	0	8	0
Sus_scrofa	153	0	0	0	0	1209	1	0	0	0	0	0	0	1363	23	0	0	0	0	284	0	0	0	0	0	0	0	307	1670	0	0	0	0	0	0	0	0	0	0	0	0	0	0	0	0	0	0	10	0
Oryctolagus_cuniculus	95	1	0	0	0	655	1	0	0	0	0	1	0	753	7	1	0	0	0	75	0	0	0	0	0	0	0	83	836	5	1	0	0	0	17	0	0	0	0	0	0	23	3	0	0	0	0	14	0
Xenopus_tropicalis	12	14	33	17	11	906	1	0	0	0	0	3	0	997	3	2	7	0	0	99	0	0	0	0	0	0	0	111	1108	0	0	0	0	0	0	0	0	0	0	0	0	0	0	0	0	0	0	0	0
Anolis_carolinensis	1	0	0	0	0	107	1	0	0	0	0	1	0	110	0	0	0	0	0	5	0	0	0	0	0	0	0	5	115	0	0	0	0	0	0	0	0	0	0	0	0	0	0	0	0	0	0	1	0
Meleagris_gallopavo	7	0	0	0	0	36	0	0	0	0	0	1	0	44	0	0	0	0	0	31	0	0	0	0	0	0	0	31	75	1	0	0	0	0	26	0	0	0	0	0	0	27	6	0	0	0	0	254	0
Microcebus_murinus	152	1	0	0	0	617	1	0	0	0	0	0	0	771	4	2	0	0	0	52	0	0	0	0	0	0	0	58	829	4	0	0	0	0	12	0	0	0	0	0	0	16	4	0	0	0	0	14	0
Maylandia_zebra	0	3	92	7	45	0	1	1	0	0	0	1	33	183	0	0	9	0	0	2	0	0	0	0	0	0	4	15	198	0	0	0	0	0	0	0	0	0	0	0	0	0	0	0	1	0	0	0	0
Chrysemys_picta_bellii	404	1	0	0	0	508	0	0	0	0	0	1	0	914	0	0	0	0	0	7	0	0	0	0	0	0	0	7	921	43	0	0	0	0	59	0	0	0	0	0	0	102	100	0	0	0	0	177	0
Lepisosteus_oculatus	3	18	59	3	18	29	2	1	0	0	0	2	20	155	0	0	4	2	3	1	0	0	0	0	0	1	18	29	184	2	3	11	2	1	4	0	0	0	0	0	10	33	1	1	5	0	2	13	0
Bos_indicus	149	1	0	0	0	665	1	0	0	0	0	0	0	816	11	0	0	0	0	112	0	0	0	0	0	0	0	123	939	28	0	0	0	0	106	0	0	0	0	0	0	134	3	0	0	0	0	15	0
Ficedula_albicollis	0	0	0	0	0	17	0	0	0	0	0	1	0	18	0	0	0	0	0	3	0	0	0	0	0	0	0	3	21	1	0	0	0	0	4	0	0	0	0	0	0	5	0	0	0	0	0	16	0
Microtus_ochrogaster	98	0	0	0	0	775	1	0	0	0	0	0	0	874	4	2	0	0	0	87	0	0	0	0	0	0	0	93	967	1	0	0	0	0	53	0	0	0	0	0	0	54	5	0	0	0	0	54	0
Chlorocebus_sabaeus	37	0	0	0	0	261	1	0	0	0	0	1	0	300	8	0	0	0	0	37	0	0	0	0	0	0	0	45	345	1	0	0	0	0	31	0	0	0	0	0	0	32	1	0	0	0	0	3	0
Cynoglossus_semilaevis	0	1	50	4	15	0	1	1	0	0	0	1	9	82	0	0	9	1	6	0	0	0	0	0	0	0	0	16	98	0	0	8	0	1	0	0	0	0	0	0	0	9	0	0	10	0	3	0	0
Poecilia_reticulata	0	4	42	6	25	0	1	2	0	0	0	1	7	88	0	0	5	0	3	0	0	0	0	0	0	0	0	8	96	0	0	8	0	4	0	0	0	0	0	0	0	12	0	0	7	0	2	0	0
Corvus_cornix_cornix	6	0	0	0	0	13	0	0	0	0	0	1	0	20	1	0	0	0	0	5	0	0	0	0	0	0	0	6	26	0	0	0	0	0	0	0	0	0	0	0	0	0	0	0	0	0	0	0	0
Nasalis_larvatus	20	0	0	0	0	141	0	0	0	0	0	0	0	161	13	0	0	0	0	32	0	0	0	0	0	0	0	45	206	12	0	0	0	0	39	0	0	0	0	0	0	51	16	0	0	0	0	46	1
Camelus_dromedarius	76	0	0	0	0	480	1	0	0	0	0	0	0	557	10	0	0	0	0	103	0	0	0	0	0	0	0	113	670	0	0	0	0	0	40	0	0	0	0	0	0	40	0	0	0	0	0	90	0
Larimichthys_crocea	0	2	77	4	54	0	1	1	0	0	0	1	9	149	0	0	14	0	10	0	0	0	0	0	0	0	2	26	175	0	0	1	0	1	0	0	0	0	0	0	0	2	0	0	12	0	12	0	0
Capra_aegagrus	108	1	0	0	0	689	1	0	0	0	0	0	0	799	12	1	0	0	0	141	0	0	0	0	0	0	0	154	953	5	0	0	0	0	48	0	0	0	0	0	0	53	38	0	0	0	0	183	0
Xiphophorus_couchianus	0	7	53	5	28	0	1	2	0	0	0	1	9	106	0	0	3	0	4	0	0	0	0	0	0	0	1	8	114	0	0	0	0	0	0	0	0	0	0	0	0	0	0	0	0	0	0	0	0
Nothobranchius_furzeri	0	4	42	11	16	0	1	1	0	0	0	1	9	85	0	0	2	0	2	0	0	0	0	0	0	0	3	7	92	0	0	2	0	0	0	0	0	0	0	0	0	2	0	0	2	1	2	0	0
Parus_major	4	0	0	0	0	17	0	0	0	0	0	1	0	22	0	0	0	0	0	0	0	0	0	0	0	0	0	0	22	1	0	0	0	0	0	0	0	0	0	0	0	1	0	0	0	0	0	1	0
Coturnix_japonica	9	0	0	0	0	37	0	0	0	0	0	1	0	47	0	0	0	0	0	12	0	0	0	0	0	0	0	12	59	1	0	0	0	0	16	0	0	0	0	0	0	17	0	0	0	0	0	11	0
[truncated: 471 more rows]
[truncated: 479 more columns]

## Sheet: c-Modifications_species_phylo
Species name on NCBI	Species name on reference phylogeny	REF to assess subspecies or synonyms	Species class	Reference phylogeny
[truncated: 442 more rows]

[truncated: 16 more sheets: d-Outgroup_sequences, e-Comparison_previous_studies, f-Animal_silhouette_source, g-AOB_Bats, h-Species_diet, i-Mammals_OB, j-Birds_OB, k-Actinopteygii_Lamellae, l-T1R_Mammals, m-Ecology_PGLS_metadata, n-Ecology_PGLS_results, o-Ecological_data_Actino, p-Ecological_data_Aves, q-Ecological_data_Mammals, r-Lepidosauria_Amphibia_blastn, s-Calibration points]
